# Supplementary material
Source: publisher figshare collection journal article supplement (https://acs.figshare.com/ndownloader/files/4085125)
Supplement: Supplementary file 1 [file 4085125]

data_compound_6

_audit_creation_method           SHELXL-97
_audit_block_code                ga_ng8
_audit_block_refno               1246
_audit_block_usercomment         NG-131-02
_audit_creation_date             ?
_audit_update_record             'Mon Oct 29 17:35:06 CET 2012'


_chemical_name_systematic        ?
_chemical_name_common            ?
_chemical_formula_moiety         ?
_chemical_formula_sum            'C54 H65 B2 N P2'
_chemical_melting_point          ?

_exptl_crystal_description       needle
_exptl_crystal_colour            colourless

_diffrn_ambient_temperature      100(2)
_chemical_formula_weight         811.63

loop_
_atom_type_symbol
_atom_type_description
_atom_type_scat_dispersion_real
_atom_type_scat_dispersion_imag
_atom_type_scat_source
C C 0.0033 0.0016 'International Tables Vol C Tables 4.2.6.8 and 6.1.1.4'
H H 0.0000 0.0000 'International Tables Vol C Tables 4.2.6.8 and 6.1.1.4'
B B 0.0013 0.0007 'International Tables Vol C Tables 4.2.6.8 and 6.1.1.4'
N N 0.0061 0.0033 'International Tables Vol C Tables 4.2.6.8 and 6.1.1.4'
P P 0.1023 0.0942 'International Tables Vol C Tables 4.2.6.8 and 6.1.1.4'

_symmetry_cell_setting           orthorhombic
_symmetry_space_group_name_H-M   'P 21 21 21'
_symmetry_int_tables_number      19

_chemical_absolute_configuration ad

loop_
_symmetry_equiv_pos_as_xyz
'x, y, z'
'-x+1/2, -y, z+1/2'
'x+1/2, -y+1/2, -z'
'-x, y+1/2, -z+1/2'

_cell_length_a                   13.495(6)
_cell_length_b                   14.299(7)
_cell_length_c                   24.239(10)
_cell_angle_alpha                90.00
_cell_angle_beta                 90.00
_cell_angle_gamma                90.00
_cell_volume                     4677(4)
_cell_formula_units_Z            4
_cell_measurement_temperature    100(2)
_cell_measurement_reflns_used    8182
_cell_measurement_theta_min      2.20
_cell_measurement_theta_max      28.80
_exptl_crystal_size_max          0.29
_exptl_crystal_size_mid          0.10
_exptl_crystal_size_min          0.06
_exptl_crystal_density_meas      ?
_exptl_crystal_density_diffrn    1.153
_exptl_crystal_density_method    'not measured'
_exptl_crystal_F_000             1744
_exptl_absorpt_coefficient_mu    0.130

_exptl_absorpt_correction_type   multi-scan
_exptl_absorpt_correction_T_min  0.6708
_exptl_absorpt_correction_T_max  0.7461
_exptl_absorpt_process_details
;
multi-scan from symmetry-related measurements (Blessing 1995)
SADABS (Sheldrick & Bruker AXS, 2004-2008)
;

_exptl_special_details
;
 ?
;
_diffrn_radiation_probe          x-ray
_diffrn_radiation_type           MoK\a
_diffrn_radiation_wavelength     0.71073
_diffrn_source                   'sealed X-Ray tube (Mo)'
_diffrn_source_type              'fine focus tube'
_diffrn_radiation_monochromator  graphite
_diffrn_measurement_device_type  'Bruker AXS Smart 1000'
_diffrn_measurement_method       '\f- and \w-scans'
_diffrn_detector_area_resol_mean 8.19
_diffrn_reflns_number            13136
_diffrn_reflns_av_R_equivalents  0.0000
_diffrn_reflns_av_sigmaI/netI    0.0571
_diffrn_reflns_limit_h_min       -18
_diffrn_reflns_limit_h_max       18
_diffrn_reflns_limit_k_min       0
_diffrn_reflns_limit_k_max       19
_diffrn_reflns_limit_l_min       0
_diffrn_reflns_limit_l_max       33
_diffrn_reflns_theta_min         2.08
_diffrn_reflns_theta_max         29.57
_reflns_number_total             13136
_reflns_number_gt                10430
_reflns_threshold_expression     >2sigma(I)
_computing_data_collection       'SMART-5.631 (Bruker AXS, 2003)'

_computing_cell_refinement
;
SAINT 8.x (Bruker AXS, 1997-2011). Includes estimated systematic errors
 of the unit cell constants from Monte Carlo simulations.
;
_computing_data_reduction        'SAINT 8.x (Bruker AXS, 1997-2011)'
_computing_structure_solution    'SUPERFLIP (Palatinus, 2007-2009)'
_computing_structure_refinement  'SHELXL-97 (Sheldrick, 2008)'
_computing_molecular_graphics    ?
_computing_publication_material  'encif (Wadepohl, 2012); encifer 1.4 (CCDC, 2011)'

_refine_special_details
;
 Refinement of F^2^ against ALL reflections.  The weighted R-factor wR and
 goodness of fit S are based on F^2^, conventional R-factors R are based
 on F, with F set to zero for negative F^2^. The threshold expression of
 F^2^ > 2sigma(F^2^) is used only for calculating R-factors(gt) etc. and is
 not relevant to the choice of reflections for refinement.  R-factors based
 on F^2^ are statistically about twice as large as those based on F, and R-
 factors based on ALL data will be even larger.
;

_refine_ls_structure_factor_coef Fsqd
_refine_ls_matrix_type           full
_refine_ls_weighting_scheme      calc
_refine_ls_weighting_details
'calc w=1/[\s^2^(Fo^2^)+(0.0407P)^2^+1.9145P] where P=(Fo^2^+2Fc^2^)/3'
_atom_sites_solution_primary     iterative
_atom_sites_solution_secondary   difmap
_atom_sites_solution_hydrogens   geom
_refine_ls_hydrogen_treatment    mixed
_refine_ls_extinction_method     none
_refine_ls_extinction_coef       ?
_refine_ls_abs_structure_details 'Flack H D (1983), Acta Cryst. A39, 876-881'
_refine_ls_abs_structure_Flack   -0.01(7)
_refine_ls_number_reflns         13136
_refine_ls_number_parameters     544
_refine_ls_number_restraints     0
_refine_ls_R_factor_all          0.0711
_refine_ls_R_factor_gt           0.0471
_refine_ls_wR_factor_ref         0.1081
_refine_ls_wR_factor_gt          0.0970
_refine_ls_goodness_of_fit_ref   1.011
_refine_ls_restrained_S_all      1.011
_refine_ls_shift/su_max          0.001
_refine_ls_shift/su_mean         0.000

loop_
_atom_site_label
_atom_site_type_symbol
_atom_site_fract_x
_atom_site_fract_y
_atom_site_fract_z
_atom_site_U_iso_or_equiv
_atom_site_adp_type
_atom_site_occupancy
_atom_site_symmetry_multiplicity
_atom_site_calc_flag
_atom_site_refinement_flags
_atom_site_disorder_assembly
_atom_site_disorder_group
P1 P -0.00338(4) 0.71641(3) 0.258193(19) 0.01918(10) Uani 1 1 d . . .
P2 P 0.49146(4) 0.79497(3) 0.222740(19) 0.01631(10) Uani 1 1 d . . .
N1 N 0.16095(12) 0.88422(12) 0.20323(7) 0.0166(3) Uani 1 1 d . . .
C2 C 0.23601(14) 0.91078(13) 0.16715(8) 0.0163(4) Uani 1 1 d . . .
C3 C 0.33883(14) 0.90829(13) 0.17462(8) 0.0169(4) Uani 1 1 d . . .
C4 C 0.39602(14) 0.94591(14) 0.13238(8) 0.0184(4) Uani 1 1 d . . .
H4 H 0.4661 0.9443 0.1361 0.022 Uiso 1 1 calc R . .
C5 C 0.35541(15) 0.98645(14) 0.08413(8) 0.0177(4) Uani 1 1 d . . .
C6 C 0.25308(14) 0.98691(13) 0.07814(8) 0.0166(4) Uani 1 1 d . . .
H6 H 0.2237 1.0133 0.0461 0.020 Uiso 1 1 calc R . .
C7 C 0.19361(14) 0.94855(13) 0.11934(8) 0.0157(4) Uani 1 1 d . . .
C8 C 0.08728(14) 0.93976(13) 0.12531(8) 0.0156(4) Uani 1 1 d . . .
C9 C 0.00836(15) 0.96298(12) 0.09080(7) 0.0162(4) Uani 1 1 d . . .
H9 H 0.0206 0.9905 0.0558 0.019 Uiso 1 1 calc R . .
C10 C -0.08797(14) 0.94584(14) 0.10778(8) 0.0176(4) Uani 1 1 d . . .
C11 C -0.10294(14) 0.90579(14) 0.16046(8) 0.0182(4) Uani 1 1 d . . .
H11 H -0.1691 0.8950 0.1723 0.022 Uiso 1 1 calc R . .
C12 C -0.02606(14) 0.88138(13) 0.19595(8) 0.0164(4) Uani 1 1 d . . .
C13 C 0.06989(14) 0.89913(13) 0.17736(8) 0.0161(4) Uani 1 1 d . . .
C14 C -0.04869(15) 0.83691(13) 0.25122(8) 0.0183(4) Uani 1 1 d . . .
H14A H -0.1213 0.8372 0.2569 0.022 Uiso 1 1 calc R . .
H14B H -0.0186 0.8756 0.2807 0.022 Uiso 1 1 calc R . .
C15 C 0.38208(14) 0.87050(14) 0.22772(8) 0.0191(4) Uani 1 1 d . . .
H15A H 0.3294 0.8350 0.2470 0.023 Uiso 1 1 calc R . .
H15B H 0.3994 0.9244 0.2514 0.023 Uiso 1 1 calc R . .
C16 C -0.09622(15) 0.65188(15) 0.29884(8) 0.0212(4) Uani 1 1 d . . .
H16 H -0.0632 0.5925 0.3105 0.025 Uiso 1 1 calc R . .
C17 C -0.17362(16) 0.62375(15) 0.25581(9) 0.0242(4) Uani 1 1 d . . .
H17A H -0.2184 0.5750 0.2707 0.029 Uiso 1 1 calc R . .
H17B H -0.2138 0.6785 0.2446 0.029 Uiso 1 1 calc R . .
C18 C -0.11438(17) 0.58600(15) 0.20693(9) 0.0265(5) Uani 1 1 d . . .
H18A H -0.1587 0.5755 0.1750 0.032 Uiso 1 1 calc R . .
H18B H -0.0830 0.5257 0.2168 0.032 Uiso 1 1 calc R . .
C19 C -0.03400(16) 0.65896(15) 0.19208(9) 0.0242(4) Uani 1 1 d . . .
H19 H -0.0656 0.7070 0.1678 0.029 Uiso 1 1 calc R . .
C20 C 0.45700(15) 0.69665(14) 0.17674(8) 0.0207(4) Uani 1 1 d . . .
H20 H 0.3861 0.7057 0.1660 0.025 Uiso 1 1 calc R . .
C21 C 0.46178(18) 0.61003(15) 0.21496(8) 0.0276(5) Uani 1 1 d . . .
H21A H 0.4194 0.5594 0.2002 0.033 Uiso 1 1 calc R . .
H21B H 0.5307 0.5866 0.2174 0.033 Uiso 1 1 calc R . .
C22 C 0.42527(17) 0.63983(14) 0.27179(8) 0.0234(4) Uani 1 1 d . . .
H22A H 0.4359 0.5891 0.2990 0.028 Uiso 1 1 calc R . .
H22B H 0.3537 0.6549 0.2706 0.028 Uiso 1 1 calc R . .
C23 C 0.48564(14) 0.72649(13) 0.28754(7) 0.0176(4) Uani 1 1 d . . .
H23 H 0.5545 0.7051 0.2961 0.021 Uiso 1 1 calc R . .
C24 C 0.42483(15) 1.03052(15) 0.04163(8) 0.0195(4) Uani 1 1 d . . .
C25 C 0.36852(15) 1.07270(16) -0.00763(8) 0.0248(5) Uani 1 1 d . . .
H25A H 0.3306 1.0235 -0.0262 0.037 Uiso 1 1 calc R . .
H25B H 0.4159 1.1001 -0.0336 0.037 Uiso 1 1 calc R . .
H25C H 0.3232 1.1213 0.0056 0.037 Uiso 1 1 calc R . .
C26 C 0.49699(17) 0.95659(15) 0.01943(9) 0.0284(4) Uani 1 1 d . . .
H26A H 0.5343 0.9293 0.0502 0.043 Uiso 1 1 calc R . .
H26B H 0.5431 0.9860 -0.0066 0.043 Uiso 1 1 calc R . .
H26C H 0.4597 0.9073 0.0005 0.043 Uiso 1 1 calc R . .
C27 C 0.48291(16) 1.10955(15) 0.06954(9) 0.0267(5) Uani 1 1 d . . .
H27A H 0.4366 1.1574 0.0828 0.040 Uiso 1 1 calc R . .
H27B H 0.5288 1.1376 0.0429 0.040 Uiso 1 1 calc R . .
H27C H 0.5204 1.0843 0.1008 0.040 Uiso 1 1 calc R . .
C28 C -0.17769(14) 0.96757(14) 0.07109(8) 0.0187(4) Uani 1 1 d . . .
C29 C -0.24702(15) 1.03664(16) 0.10053(9) 0.0248(5) Uani 1 1 d . . .
H29A H -0.2705 1.0088 0.1351 0.037 Uiso 1 1 calc R . .
H29B H -0.3038 1.0506 0.0767 0.037 Uiso 1 1 calc R . .
H29C H -0.2110 1.0945 0.1086 0.037 Uiso 1 1 calc R . .
C30 C -0.23320(15) 0.87603(16) 0.05928(9) 0.0249(5) Uani 1 1 d . . .
H30A H -0.1886 0.8320 0.0408 0.037 Uiso 1 1 calc R . .
H30B H -0.2902 0.8889 0.0354 0.037 Uiso 1 1 calc R . .
H30C H -0.2562 0.8488 0.0941 0.037 Uiso 1 1 calc R . .
C31 C -0.14657(15) 1.01127(16) 0.01621(9) 0.0243(4) Uani 1 1 d . . .
H31A H -0.1104 1.0695 0.0232 0.037 Uiso 1 1 calc R . .
H31B H -0.2056 1.0247 -0.0059 0.037 Uiso 1 1 calc R . .
H31C H -0.1037 0.9676 -0.0038 0.037 Uiso 1 1 calc R . .
C32 C -0.12820(15) 0.69963(14) 0.35150(8) 0.0207(4) Uani 1 1 d . . .
C33 C -0.21801(16) 0.74572(16) 0.35755(9) 0.0269(5) Uani 1 1 d . . .
H33 H -0.2623 0.7492 0.3272 0.032 Uiso 1 1 calc R . .
C34 C -0.24397(18) 0.78682(18) 0.40742(9) 0.0310(5) Uani 1 1 d . . .
H34 H -0.3058 0.8180 0.4109 0.037 Uiso 1 1 calc R . .
C35 C -0.18029(18) 0.78260(17) 0.45205(9) 0.0302(5) Uani 1 1 d . . .
H35 H -0.1981 0.8108 0.4861 0.036 Uiso 1 1 calc R . .
C36 C -0.09060(18) 0.73695(16) 0.44667(9) 0.0302(5) Uani 1 1 d . . .
H36 H -0.0467 0.7333 0.4772 0.036 Uiso 1 1 calc R . .
C37 C -0.06445(17) 0.69646(15) 0.39671(9) 0.0260(4) Uani 1 1 d . . .
H37 H -0.0021 0.6661 0.3933 0.031 Uiso 1 1 calc R . .
C38 C 0.05856(18) 0.62449(16) 0.16308(9) 0.0281(5) Uani 1 1 d . . .
C39 C 0.0942(2) 0.67084(19) 0.11710(10) 0.0370(6) Uani 1 1 d . . .
H39 H 0.0572 0.7209 0.1016 0.044 Uiso 1 1 calc R . .
C40 C 0.1836(2) 0.6446(2) 0.09346(10) 0.0471(7) Uani 1 1 d . . .
H40 H 0.2081 0.6773 0.0622 0.057 Uiso 1 1 calc R . .
C41 C 0.2371(2) 0.5712(2) 0.11515(12) 0.0502(8) Uani 1 1 d . . .
H41 H 0.2976 0.5528 0.0983 0.060 Uiso 1 1 calc R . .
C42 C 0.2033(2) 0.52433(19) 0.16126(13) 0.0456(7) Uani 1 1 d . . .
H42 H 0.2405 0.4743 0.1765 0.055 Uiso 1 1 calc R . .
C43 C 0.1137(2) 0.55143(17) 0.18511(12) 0.0389(6) Uani 1 1 d . . .
H43 H 0.0900 0.5195 0.2168 0.047 Uiso 1 1 calc R . .
C44 C 0.51648(17) 0.68808(13) 0.12407(8) 0.0239(4) Uani 1 1 d . . .
C45 C 0.47281(18) 0.70885(16) 0.07356(8) 0.0302(5) Uani 1 1 d . . .
H45 H 0.4062 0.7302 0.0725 0.036 Uiso 1 1 calc R . .
C46 C 0.5255(2) 0.69873(17) 0.02463(9) 0.0387(6) Uani 1 1 d . . .
H46 H 0.4948 0.7135 -0.0096 0.046 Uiso 1 1 calc R . .
C47 C 0.6219(2) 0.66737(17) 0.02554(11) 0.0413(7) Uani 1 1 d . . .
H47 H 0.6572 0.6592 -0.0080 0.050 Uiso 1 1 calc R . .
C48 C 0.6671(2) 0.64784(17) 0.07535(11) 0.0388(6) Uani 1 1 d . . .
H48 H 0.7340 0.6273 0.0761 0.047 Uiso 1 1 calc R . .
C49 C 0.61473(18) 0.65824(16) 0.12457(10) 0.0310(5) Uani 1 1 d . . .
H49 H 0.6463 0.6449 0.1587 0.037 Uiso 1 1 calc R . .
C50 C 0.45033(15) 0.78437(14) 0.33612(8) 0.0195(4) Uani 1 1 d . . .
C51 C 0.35893(16) 0.76945(15) 0.36080(8) 0.0238(4) Uani 1 1 d . . .
H51 H 0.3177 0.7202 0.3480 0.029 Uiso 1 1 calc R . .
C52 C 0.32699(18) 0.82553(17) 0.40399(9) 0.0307(5) Uani 1 1 d . . .
H52 H 0.2644 0.8142 0.4207 0.037 Uiso 1 1 calc R . .
C53 C 0.38576(19) 0.89782(17) 0.42285(9) 0.0320(5) Uani 1 1 d . . .
H53 H 0.3636 0.9364 0.4523 0.038 Uiso 1 1 calc R . .
C54 C 0.47677(18) 0.91374(16) 0.39881(9) 0.0302(5) Uani 1 1 d . . .
H54 H 0.5174 0.9634 0.4117 0.036 Uiso 1 1 calc R . .
C55 C 0.50913(17) 0.85744(14) 0.35580(8) 0.0234(4) Uani 1 1 d . . .
H55 H 0.5721 0.8688 0.3396 0.028 Uiso 1 1 calc R . .
B1 B 0.12730(18) 0.7071(2) 0.28780(12) 0.0317(6) Uani 1 1 d . . .
H1A H 0.1366 0.7550 0.3162 0.048 Uiso 1 1 calc R . .
H1B H 0.1759 0.7164 0.2582 0.048 Uiso 1 1 calc R . .
H1C H 0.1366 0.6450 0.3041 0.048 Uiso 1 1 calc R . .
B2 B 0.61534(17) 0.85636(18) 0.21103(10) 0.0228(5) Uani 1 1 d . . .
H2A H 0.6179 0.8808 0.1733 0.034 Uiso 1 1 calc R . .
H2B H 0.6695 0.8117 0.2165 0.034 Uiso 1 1 calc R . .
H2C H 0.6222 0.9081 0.2373 0.034 Uiso 1 1 calc R . .
H1 H 0.1702(17) 0.8463(17) 0.2281(10) 0.022(6) Uiso 1 1 d . . .

loop_
_atom_site_aniso_label
_atom_site_aniso_U_11
_atom_site_aniso_U_22
_atom_site_aniso_U_33
_atom_site_aniso_U_23
_atom_site_aniso_U_13
_atom_site_aniso_U_12
P1 0.0211(2) 0.0180(2) 0.0185(2) 0.00314(18) 0.0017(2) 0.0014(2)
P2 0.0177(2) 0.0166(2) 0.0146(2) 0.00070(17) -0.00014(19) 0.0004(2)
N1 0.0173(8) 0.0170(8) 0.0155(8) 0.0034(6) 0.0000(6) 0.0000(6)
C2 0.0191(9) 0.0146(9) 0.0153(9) -0.0004(7) 0.0014(7) -0.0009(7)
C3 0.0182(9) 0.0165(9) 0.0160(9) -0.0002(7) -0.0016(7) 0.0001(7)
C4 0.0145(9) 0.0210(10) 0.0196(10) 0.0004(8) -0.0004(7) 0.0004(7)
C5 0.0196(10) 0.0182(10) 0.0153(9) -0.0006(7) 0.0009(7) -0.0009(7)
C6 0.0167(9) 0.0184(10) 0.0148(9) 0.0004(7) -0.0021(7) 0.0005(7)
C7 0.0156(9) 0.0165(9) 0.0150(9) -0.0002(7) -0.0021(7) -0.0013(7)
C8 0.0161(9) 0.0138(9) 0.0170(9) -0.0012(7) 0.0009(7) -0.0003(7)
C9 0.0167(9) 0.0160(8) 0.0158(8) 0.0001(6) -0.0007(7) 0.0005(8)
C10 0.0172(9) 0.0166(9) 0.0190(9) -0.0026(8) -0.0017(7) 0.0019(7)
C11 0.0152(9) 0.0168(9) 0.0227(10) -0.0008(8) 0.0026(7) -0.0008(7)
C12 0.0190(10) 0.0138(8) 0.0163(9) 0.0007(7) 0.0027(7) -0.0007(7)
C13 0.0171(9) 0.0138(9) 0.0174(9) -0.0007(7) -0.0021(7) 0.0009(7)
C14 0.0197(9) 0.0173(9) 0.0180(10) 0.0022(7) 0.0038(8) -0.0001(7)
C15 0.0169(9) 0.0229(10) 0.0175(9) 0.0022(8) -0.0012(7) 0.0030(8)
C16 0.0251(11) 0.0173(9) 0.0211(10) 0.0043(8) 0.0017(8) -0.0004(8)
C17 0.0274(11) 0.0207(10) 0.0247(10) 0.0004(8) 0.0005(9) -0.0011(8)
C18 0.0325(12) 0.0216(11) 0.0253(11) -0.0016(9) 0.0017(9) -0.0021(9)
C19 0.0334(12) 0.0201(10) 0.0191(10) 0.0019(8) 0.0024(8) 0.0009(9)
C20 0.0240(10) 0.0215(10) 0.0165(9) -0.0019(8) -0.0002(8) -0.0028(8)
C21 0.0408(13) 0.0192(10) 0.0228(11) -0.0013(8) 0.0043(9) -0.0010(9)
C22 0.0336(12) 0.0185(9) 0.0180(10) 0.0020(8) 0.0012(9) -0.0018(8)
C23 0.0193(9) 0.0187(9) 0.0148(8) 0.0026(7) 0.0007(7) 0.0007(8)
C24 0.0170(9) 0.0251(10) 0.0164(9) 0.0037(8) 0.0006(8) -0.0011(8)
C25 0.0197(10) 0.0362(12) 0.0184(10) 0.0069(9) -0.0023(8) -0.0042(9)
C26 0.0246(10) 0.0344(11) 0.0262(10) 0.0037(9) 0.0067(10) 0.0055(10)
C27 0.0251(11) 0.0282(11) 0.0269(11) 0.0055(9) -0.0007(9) -0.0064(9)
C28 0.0131(9) 0.0234(10) 0.0196(10) 0.0001(8) -0.0023(7) 0.0010(8)
C29 0.0164(10) 0.0317(12) 0.0265(11) -0.0008(9) -0.0013(8) 0.0065(9)
C30 0.0195(10) 0.0289(12) 0.0262(11) -0.0047(9) -0.0013(8) -0.0026(8)
C31 0.0195(10) 0.0318(12) 0.0217(10) 0.0050(9) -0.0029(9) 0.0012(8)
C32 0.0238(10) 0.0177(9) 0.0207(9) 0.0047(8) 0.0040(8) -0.0028(8)
C33 0.0234(11) 0.0314(12) 0.0260(11) 0.0019(9) -0.0003(9) -0.0013(9)
C34 0.0295(12) 0.0355(13) 0.0281(11) 0.0000(10) 0.0070(9) 0.0040(11)
C35 0.0401(13) 0.0297(12) 0.0208(10) 0.0003(9) 0.0037(9) 0.0002(10)
C36 0.0398(14) 0.0268(12) 0.0241(11) 0.0004(9) -0.0066(10) 0.0005(10)
C37 0.0279(11) 0.0229(11) 0.0271(11) 0.0010(9) -0.0023(9) 0.0036(9)
C38 0.0356(12) 0.0241(11) 0.0245(11) -0.0060(9) 0.0083(9) -0.0048(9)
C39 0.0497(16) 0.0397(14) 0.0215(11) -0.0047(10) 0.0046(11) -0.0090(12)
C40 0.0525(18) 0.067(2) 0.0223(12) -0.0091(13) 0.0151(12) -0.0179(16)
C41 0.0424(16) 0.0581(19) 0.0500(17) -0.0277(15) 0.0204(14) -0.0101(14)
C42 0.0411(15) 0.0268(13) 0.069(2) -0.0115(13) 0.0178(14) 0.0017(11)
C43 0.0423(15) 0.0224(12) 0.0521(16) 0.0019(11) 0.0177(13) 0.0007(11)
C44 0.0340(12) 0.0180(9) 0.0196(9) -0.0050(7) 0.0043(9) -0.0063(8)
C45 0.0415(13) 0.0278(11) 0.0214(10) -0.0016(9) 0.0002(9) -0.0073(10)
C46 0.0607(17) 0.0364(13) 0.0192(11) -0.0049(9) 0.0042(10) -0.0154(12)
C47 0.0654(18) 0.0265(12) 0.0321(14) -0.0122(10) 0.0212(13) -0.0170(12)
C48 0.0412(14) 0.0274(12) 0.0479(15) -0.0082(11) 0.0187(12) -0.0033(11)
C49 0.0375(13) 0.0248(11) 0.0307(12) -0.0033(9) 0.0060(10) 0.0009(10)
C50 0.0234(10) 0.0201(9) 0.0151(8) 0.0020(8) -0.0027(7) 0.0030(8)
C51 0.0243(11) 0.0252(11) 0.0218(10) 0.0024(8) 0.0021(8) 0.0002(8)
C52 0.0316(13) 0.0336(13) 0.0268(11) 0.0031(9) 0.0079(10) 0.0015(10)
C53 0.0450(14) 0.0308(12) 0.0203(11) -0.0044(9) 0.0050(10) 0.0051(11)
C54 0.0417(14) 0.0279(11) 0.0210(10) -0.0028(9) -0.0037(9) -0.0076(10)
C55 0.0248(10) 0.0263(10) 0.0191(9) 0.0011(7) -0.0022(9) -0.0016(9)
B1 0.0227(12) 0.0331(14) 0.0394(15) 0.0103(12) -0.0025(10) 0.0008(11)
B2 0.0183(11) 0.0243(12) 0.0259(12) 0.0025(9) 0.0020(9) 0.0008(9)

_geom_special_details
;
 All esds (except the esd in the dihedral angle between two l.s. planes)
 are estimated using the full covariance matrix.  The cell esds are taken
 into account individually in the estimation of esds in distances, angles
 and torsion angles; correlations between esds in cell parameters are only
 used when they are defined by crystal symmetry.  An approximate (isotropic)
 treatment of cell esds is used for estimating esds involving l.s. planes.
;

loop_
_geom_bond_atom_site_label_1
_geom_bond_atom_site_label_2
_geom_bond_distance
_geom_bond_site_symmetry_2
_geom_bond_publ_flag
P1 C14 1.836(2) . ?
P1 C16 1.842(2) . ?
P1 C19 1.848(2) . ?
P1 B1 1.909(3) . ?
P2 C15 1.833(2) . ?
P2 C23 1.8525(19) . ?
P2 C20 1.853(2) . ?
P2 B2 1.909(2) . ?
N1 C2 1.391(2) . ?
N1 C13 1.396(3) . ?
N1 H1 0.82(2) . ?
C2 C3 1.400(3) . ?
C2 C7 1.401(3) . ?
C3 C4 1.391(3) . ?
C3 C15 1.513(3) . ?
C4 C5 1.416(3) . ?
C4 H4 0.9500 . ?
C5 C6 1.389(3) . ?
C5 C24 1.528(3) . ?
C6 C7 1.394(3) . ?
C6 H6 0.9500 . ?
C7 C8 1.448(3) . ?
C8 C9 1.394(3) . ?
C8 C13 1.408(3) . ?
C9 C10 1.385(3) . ?
C9 H9 0.9500 . ?
C10 C11 1.414(3) . ?
C10 C28 1.534(3) . ?
C11 C12 1.392(3) . ?
C11 H11 0.9500 . ?
C12 C13 1.394(3) . ?
C12 C14 1.514(3) . ?
C14 H14A 0.9900 . ?
C14 H14B 0.9900 . ?
C15 H15A 0.9900 . ?
C15 H15B 0.9900 . ?
C16 C32 1.510(3) . ?
C16 C17 1.530(3) . ?
C16 H16 1.0000 . ?
C17 C18 1.528(3) . ?
C17 H17A 0.9900 . ?
C17 H17B 0.9900 . ?
C18 C19 1.547(3) . ?
C18 H18A 0.9900 . ?
C18 H18B 0.9900 . ?
C19 C38 1.516(3) . ?
C19 H19 1.0000 . ?
C20 C44 1.513(3) . ?
C20 C21 1.548(3) . ?
C20 H20 1.0000 . ?
C21 C22 1.524(3) . ?
C21 H21A 0.9900 . ?
C21 H21B 0.9900 . ?
C22 C23 1.531(3) . ?
C22 H22A 0.9900 . ?
C22 H22B 0.9900 . ?
C23 C50 1.516(3) . ?
C23 H23 1.0000 . ?
C24 C27 1.533(3) . ?
C24 C26 1.535(3) . ?
C24 C25 1.539(3) . ?
C25 H25A 0.9800 . ?
C25 H25B 0.9800 . ?
C25 H25C 0.9800 . ?
C26 H26A 0.9800 . ?
C26 H26B 0.9800 . ?
C26 H26C 0.9800 . ?
C27 H27A 0.9800 . ?
C27 H27B 0.9800 . ?
C27 H27C 0.9800 . ?
C28 C31 1.529(3) . ?
C28 C30 1.535(3) . ?
C28 C29 1.536(3) . ?
C29 H29A 0.9800 . ?
C29 H29B 0.9800 . ?
C29 H29C 0.9800 . ?
C30 H30A 0.9800 . ?
C30 H30B 0.9800 . ?
C30 H30C 0.9800 . ?
C31 H31A 0.9800 . ?
C31 H31B 0.9800 . ?
C31 H31C 0.9800 . ?
C32 C33 1.387(3) . ?
C32 C37 1.394(3) . ?
C33 C34 1.389(3) . ?
C33 H33 0.9500 . ?
C34 C35 1.383(3) . ?
C34 H34 0.9500 . ?
C35 C36 1.381(3) . ?
C35 H35 0.9500 . ?
C36 C37 1.388(3) . ?
C36 H36 0.9500 . ?
C37 H37 0.9500 . ?
C38 C39 1.383(3) . ?
C38 C43 1.389(3) . ?
C39 C40 1.388(4) . ?
C39 H39 0.9500 . ?
C40 C41 1.378(4) . ?
C40 H40 0.9500 . ?
C41 C42 1.381(4) . ?
C41 H41 0.9500 . ?
C42 C43 1.395(4) . ?
C42 H42 0.9500 . ?
C43 H43 0.9500 . ?
C44 C45 1.391(3) . ?
C44 C49 1.393(3) . ?
C45 C46 1.390(3) . ?
C45 H45 0.9500 . ?
C46 C47 1.376(4) . ?
C46 H46 0.9500 . ?
C47 C48 1.381(4) . ?
C47 H47 0.9500 . ?
C48 C49 1.395(3) . ?
C48 H48 0.9500 . ?
C49 H49 0.9500 . ?
C50 C51 1.387(3) . ?
C50 C55 1.396(3) . ?
C51 C52 1.388(3) . ?
C51 H51 0.9500 . ?
C52 C53 1.381(3) . ?
C52 H52 0.9500 . ?
C53 C54 1.378(3) . ?
C53 H53 0.9500 . ?
C54 C55 1.387(3) . ?
C54 H54 0.9500 . ?
C55 H55 0.9500 . ?
B1 H1A 0.9800 . ?
B1 H1B 0.9800 . ?
B1 H1C 0.9800 . ?
B2 H2A 0.9800 . ?
B2 H2B 0.9800 . ?
B2 H2C 0.9800 . ?

loop_
_geom_angle_atom_site_label_1
_geom_angle_atom_site_label_2
_geom_angle_atom_site_label_3
_geom_angle
_geom_angle_site_symmetry_1
_geom_angle_site_symmetry_3
_geom_angle_publ_flag
C14 P1 C16 107.03(10) . . ?
C14 P1 C19 105.24(10) . . ?
C16 P1 C19 95.11(10) . . ?
C14 P1 B1 114.08(12) . . ?
C16 P1 B1 113.10(11) . . ?
C19 P1 B1 120.11(12) . . ?
C15 P2 C23 102.80(9) . . ?
C15 P2 C20 106.53(10) . . ?
C23 P2 C20 95.65(9) . . ?
C15 P2 B2 116.36(11) . . ?
C23 P2 B2 113.96(10) . . ?
C20 P2 B2 118.61(10) . . ?
C2 N1 C13 108.48(16) . . ?
C2 N1 H1 122.1(16) . . ?
C13 N1 H1 124.4(17) . . ?
N1 C2 C3 129.32(18) . . ?
N1 C2 C7 109.14(17) . . ?
C3 C2 C7 121.45(18) . . ?
C4 C3 C2 116.43(17) . . ?
C4 C3 C15 123.40(17) . . ?
C2 C3 C15 120.10(17) . . ?
C3 C4 C5 123.49(18) . . ?
C3 C4 H4 118.3 . . ?
C5 C4 H4 118.3 . . ?
C6 C5 C4 118.26(18) . . ?
C6 C5 C24 122.49(18) . . ?
C4 C5 C24 119.23(18) . . ?
C5 C6 C7 119.72(18) . . ?
C5 C6 H6 120.1 . . ?
C7 C6 H6 120.1 . . ?
C6 C7 C2 120.62(18) . . ?
C6 C7 C8 132.58(18) . . ?
C2 C7 C8 106.78(17) . . ?
C9 C8 C13 120.55(17) . . ?
C9 C8 C7 132.57(18) . . ?
C13 C8 C7 106.89(16) . . ?
C10 C9 C8 119.77(17) . . ?
C10 C9 H9 120.1 . . ?
C8 C9 H9 120.1 . . ?
C9 C10 C11 118.29(17) . . ?
C9 C10 C28 122.19(17) . . ?
C11 C10 C28 119.52(17) . . ?
C12 C11 C10 123.58(18) . . ?
C12 C11 H11 118.2 . . ?
C10 C11 H11 118.2 . . ?
C11 C12 C13 116.53(17) . . ?
C11 C12 C14 120.11(17) . . ?
C13 C12 C14 123.35(17) . . ?
C12 C13 N1 130.12(17) . . ?
C12 C13 C8 121.28(17) . . ?
N1 C13 C8 108.59(17) . . ?
C12 C14 P1 114.10(13) . . ?
C12 C14 H14A 108.7 . . ?
P1 C14 H14A 108.7 . . ?
C12 C14 H14B 108.7 . . ?
P1 C14 H14B 108.7 . . ?
H14A C14 H14B 107.6 . . ?
C3 C15 P2 117.72(14) . . ?
C3 C15 H15A 107.9 . . ?
P2 C15 H15A 107.9 . . ?
C3 C15 H15B 107.9 . . ?
P2 C15 H15B 107.9 . . ?
H15A C15 H15B 107.2 . . ?
C32 C16 C17 119.99(18) . . ?
C32 C16 P1 114.83(15) . . ?
C17 C16 P1 103.38(14) . . ?
C32 C16 H16 105.9 . . ?
C17 C16 H16 105.9 . . ?
P1 C16 H16 105.9 . . ?
C18 C17 C16 105.33(18) . . ?
C18 C17 H17A 110.7 . . ?
C16 C17 H17A 110.7 . . ?
C18 C17 H17B 110.7 . . ?
C16 C17 H17B 110.7 . . ?
H17A C17 H17B 108.8 . . ?
C17 C18 C19 107.99(18) . . ?
C17 C18 H18A 110.1 . . ?
C19 C18 H18A 110.1 . . ?
C17 C18 H18B 110.1 . . ?
C19 C18 H18B 110.1 . . ?
H18A C18 H18B 108.4 . . ?
C38 C19 C18 117.79(18) . . ?
C38 C19 P1 111.26(16) . . ?
C18 C19 P1 104.76(14) . . ?
C38 C19 H19 107.5 . . ?
C18 C19 H19 107.5 . . ?
P1 C19 H19 107.5 . . ?
C44 C20 C21 114.71(17) . . ?
C44 C20 P2 115.85(14) . . ?
C21 C20 P2 103.68(13) . . ?
C44 C20 H20 107.4 . . ?
C21 C20 H20 107.4 . . ?
P2 C20 H20 107.4 . . ?
C22 C21 C20 107.68(17) . . ?
C22 C21 H21A 110.2 . . ?
C20 C21 H21A 110.2 . . ?
C22 C21 H21B 110.2 . . ?
C20 C21 H21B 110.2 . . ?
H21A C21 H21B 108.5 . . ?
C21 C22 C23 106.24(17) . . ?
C21 C22 H22A 110.5 . . ?
C23 C22 H22A 110.5 . . ?
C21 C22 H22B 110.5 . . ?
C23 C22 H22B 110.5 . . ?
H22A C22 H22B 108.7 . . ?
C50 C23 C22 117.92(17) . . ?
C50 C23 P2 112.54(13) . . ?
C22 C23 P2 103.82(12) . . ?
C50 C23 H23 107.3 . . ?
C22 C23 H23 107.3 . . ?
P2 C23 H23 107.3 . . ?
C5 C24 C27 108.66(16) . . ?
C5 C24 C26 109.96(17) . . ?
C27 C24 C26 109.76(18) . . ?
C5 C24 C25 112.45(17) . . ?
C27 C24 C25 107.82(17) . . ?
C26 C24 C25 108.14(17) . . ?
C24 C25 H25A 109.5 . . ?
C24 C25 H25B 109.5 . . ?
H25A C25 H25B 109.5 . . ?
C24 C25 H25C 109.5 . . ?
H25A C25 H25C 109.5 . . ?
H25B C25 H25C 109.5 . . ?
C24 C26 H26A 109.5 . . ?
C24 C26 H26B 109.5 . . ?
H26A C26 H26B 109.5 . . ?
C24 C26 H26C 109.5 . . ?
H26A C26 H26C 109.5 . . ?
H26B C26 H26C 109.5 . . ?
C24 C27 H27A 109.5 . . ?
C24 C27 H27B 109.5 . . ?
H27A C27 H27B 109.5 . . ?
C24 C27 H27C 109.5 . . ?
H27A C27 H27C 109.5 . . ?
H27B C27 H27C 109.5 . . ?
C31 C28 C10 111.74(16) . . ?
C31 C28 C30 108.68(17) . . ?
C10 C28 C30 108.70(16) . . ?
C31 C28 C29 107.99(18) . . ?
C10 C28 C29 109.97(16) . . ?
C30 C28 C29 109.73(17) . . ?
C28 C29 H29A 109.5 . . ?
C28 C29 H29B 109.5 . . ?
H29A C29 H29B 109.5 . . ?
C28 C29 H29C 109.5 . . ?
H29A C29 H29C 109.5 . . ?
H29B C29 H29C 109.5 . . ?
C28 C30 H30A 109.5 . . ?
C28 C30 H30B 109.5 . . ?
H30A C30 H30B 109.5 . . ?
C28 C30 H30C 109.5 . . ?
H30A C30 H30C 109.5 . . ?
H30B C30 H30C 109.5 . . ?
C28 C31 H31A 109.5 . . ?
C28 C31 H31B 109.5 . . ?
H31A C31 H31B 109.5 . . ?
C28 C31 H31C 109.5 . . ?
H31A C31 H31C 109.5 . . ?
H31B C31 H31C 109.5 . . ?
C33 C32 C37 118.13(19) . . ?
C33 C32 C16 123.62(19) . . ?
C37 C32 C16 118.25(19) . . ?
C32 C33 C34 120.9(2) . . ?
C32 C33 H33 119.6 . . ?
C34 C33 H33 119.6 . . ?
C35 C34 C33 120.4(2) . . ?
C35 C34 H34 119.8 . . ?
C33 C34 H34 119.8 . . ?
C36 C35 C34 119.4(2) . . ?
C36 C35 H35 120.3 . . ?
C34 C35 H35 120.3 . . ?
C35 C36 C37 120.1(2) . . ?
C35 C36 H36 119.9 . . ?
C37 C36 H36 119.9 . . ?
C36 C37 C32 121.0(2) . . ?
C36 C37 H37 119.5 . . ?
C32 C37 H37 119.5 . . ?
C39 C38 C43 119.0(2) . . ?
C39 C38 C19 120.3(2) . . ?
C43 C38 C19 120.5(2) . . ?
C38 C39 C40 120.4(3) . . ?
C38 C39 H39 119.8 . . ?
C40 C39 H39 119.8 . . ?
C41 C40 C39 120.3(3) . . ?
C41 C40 H40 119.9 . . ?
C39 C40 H40 119.9 . . ?
C40 C41 C42 120.3(3) . . ?
C40 C41 H41 119.8 . . ?
C42 C41 H41 119.8 . . ?
C41 C42 C43 119.2(3) . . ?
C41 C42 H42 120.4 . . ?
C43 C42 H42 120.4 . . ?
C38 C43 C42 120.9(2) . . ?
C38 C43 H43 119.6 . . ?
C42 C43 H43 119.6 . . ?
C45 C44 C49 118.4(2) . . ?
C45 C44 C20 120.1(2) . . ?
C49 C44 C20 121.5(2) . . ?
C46 C45 C44 120.8(2) . . ?
C46 C45 H45 119.6 . . ?
C44 C45 H45 119.6 . . ?
C47 C46 C45 120.2(2) . . ?
C47 C46 H46 119.9 . . ?
C45 C46 H46 119.9 . . ?
C46 C47 C48 119.9(2) . . ?
C46 C47 H47 120.1 . . ?
C48 C47 H47 120.1 . . ?
C47 C48 C49 120.1(3) . . ?
C47 C48 H48 119.9 . . ?
C49 C48 H48 119.9 . . ?
C44 C49 C48 120.5(2) . . ?
C44 C49 H49 119.7 . . ?
C48 C49 H49 119.7 . . ?
C51 C50 C55 118.24(19) . . ?
C51 C50 C23 122.02(18) . . ?
C55 C50 C23 119.70(18) . . ?
C50 C51 C52 120.8(2) . . ?
C50 C51 H51 119.6 . . ?
C52 C51 H51 119.6 . . ?
C53 C52 C51 120.3(2) . . ?
C53 C52 H52 119.9 . . ?
C51 C52 H52 119.9 . . ?
C54 C53 C52 119.7(2) . . ?
C54 C53 H53 120.2 . . ?
C52 C53 H53 120.2 . . ?
C53 C54 C55 120.2(2) . . ?
C53 C54 H54 119.9 . . ?
C55 C54 H54 119.9 . . ?
C54 C55 C50 120.8(2) . . ?
C54 C55 H55 119.6 . . ?
C50 C55 H55 119.6 . . ?
P1 B1 H1A 109.5 . . ?
P1 B1 H1B 109.5 . . ?
H1A B1 H1B 109.5 . . ?
P1 B1 H1C 109.5 . . ?
H1A B1 H1C 109.5 . . ?
H1B B1 H1C 109.5 . . ?
P2 B2 H2A 109.5 . . ?
P2 B2 H2B 109.5 . . ?
H2A B2 H2B 109.5 . . ?
P2 B2 H2C 109.5 . . ?
H2A B2 H2C 109.5 . . ?
H2B B2 H2C 109.5 . . ?

loop_
_geom_torsion_atom_site_label_1
_geom_torsion_atom_site_label_2
_geom_torsion_atom_site_label_3
_geom_torsion_atom_site_label_4
_geom_torsion
_geom_torsion_site_symmetry_1
_geom_torsion_site_symmetry_2
_geom_torsion_site_symmetry_3
_geom_torsion_site_symmetry_4
_geom_torsion_publ_flag
C13 N1 C2 C3 -179.74(19) . . . . ?
C13 N1 C2 C7 3.8(2) . . . . ?
N1 C2 C3 C4 -175.54(19) . . . . ?
C7 C2 C3 C4 0.5(3) . . . . ?
N1 C2 C3 C15 1.5(3) . . . . ?
C7 C2 C3 C15 177.58(18) . . . . ?
C2 C3 C4 C5 0.9(3) . . . . ?
C15 C3 C4 C5 -176.03(18) . . . . ?
C3 C4 C5 C6 -1.4(3) . . . . ?
C3 C4 C5 C24 176.75(18) . . . . ?
C4 C5 C6 C7 0.4(3) . . . . ?
C24 C5 C6 C7 -177.67(18) . . . . ?
C5 C6 C7 C2 1.0(3) . . . . ?
C5 C6 C7 C8 179.1(2) . . . . ?
N1 C2 C7 C6 175.30(17) . . . . ?
C3 C2 C7 C6 -1.5(3) . . . . ?
N1 C2 C7 C8 -3.3(2) . . . . ?
C3 C2 C7 C8 179.94(18) . . . . ?
C6 C7 C8 C9 3.3(4) . . . . ?
C2 C7 C8 C9 -178.4(2) . . . . ?
C6 C7 C8 C13 -176.8(2) . . . . ?
C2 C7 C8 C13 1.5(2) . . . . ?
C13 C8 C9 C10 -0.1(3) . . . . ?
C7 C8 C9 C10 179.8(2) . . . . ?
C8 C9 C10 C11 0.7(3) . . . . ?
C8 C9 C10 C28 -178.44(18) . . . . ?
C9 C10 C11 C12 -0.9(3) . . . . ?
C28 C10 C11 C12 178.20(18) . . . . ?
C10 C11 C12 C13 0.6(3) . . . . ?
C10 C11 C12 C14 -178.72(18) . . . . ?
C11 C12 C13 N1 178.88(19) . . . . ?
C14 C12 C13 N1 -1.9(3) . . . . ?
C11 C12 C13 C8 0.1(3) . . . . ?
C14 C12 C13 C8 179.31(17) . . . . ?
C2 N1 C13 C12 178.3(2) . . . . ?
C2 N1 C13 C8 -2.8(2) . . . . ?
C9 C8 C13 C12 -0.3(3) . . . . ?
C7 C8 C13 C12 179.80(17) . . . . ?
C9 C8 C13 N1 -179.34(17) . . . . ?
C7 C8 C13 N1 0.8(2) . . . . ?
C11 C12 C14 P1 115.14(18) . . . . ?
C13 C12 C14 P1 -64.1(2) . . . . ?
C16 P1 C14 C12 -143.48(14) . . . . ?
C19 P1 C14 C12 -43.11(17) . . . . ?
B1 P1 C14 C12 90.63(17) . . . . ?
C4 C3 C15 P2 -44.9(3) . . . . ?
C2 C3 C15 P2 138.26(17) . . . . ?
C23 P2 C15 C3 -156.33(15) . . . . ?
C20 P2 C15 C3 -56.38(17) . . . . ?
B2 P2 C15 C3 78.41(18) . . . . ?
C14 P1 C16 C32 -49.42(17) . . . . ?
C19 P1 C16 C32 -157.08(16) . . . . ?
B1 P1 C16 C32 77.07(19) . . . . ?
C14 P1 C16 C17 83.13(15) . . . . ?
C19 P1 C16 C17 -24.53(15) . . . . ?
B1 P1 C16 C17 -150.39(15) . . . . ?
C32 C16 C17 C18 175.20(18) . . . . ?
P1 C16 C17 C18 45.73(18) . . . . ?
C16 C17 C18 C19 -50.9(2) . . . . ?
C17 C18 C19 C38 154.87(19) . . . . ?
C17 C18 C19 P1 30.6(2) . . . . ?
C14 P1 C19 C38 119.42(16) . . . . ?
C16 P1 C19 C38 -131.37(16) . . . . ?
B1 P1 C19 C38 -10.9(2) . . . . ?
C14 P1 C19 C18 -112.27(15) . . . . ?
C16 P1 C19 C18 -3.06(15) . . . . ?
B1 P1 C19 C18 117.42(16) . . . . ?
C15 P2 C20 C44 118.11(17) . . . . ?
C23 P2 C20 C44 -136.74(16) . . . . ?
B2 P2 C20 C44 -15.5(2) . . . . ?
C15 P2 C20 C21 -115.31(14) . . . . ?
C23 P2 C20 C21 -10.16(15) . . . . ?
B2 P2 C20 C21 111.10(15) . . . . ?
C44 C20 C21 C22 163.54(18) . . . . ?
P2 C20 C21 C22 36.2(2) . . . . ?
C20 C21 C22 C23 -52.2(2) . . . . ?
C21 C22 C23 C50 166.66(17) . . . . ?
C21 C22 C23 P2 41.42(18) . . . . ?
C15 P2 C23 C50 -37.90(16) . . . . ?
C20 P2 C23 C50 -146.30(14) . . . . ?
B2 P2 C23 C50 88.91(16) . . . . ?
C15 P2 C23 C22 90.71(14) . . . . ?
C20 P2 C23 C22 -17.68(14) . . . . ?
B2 P2 C23 C22 -142.47(14) . . . . ?
C6 C5 C24 C27 118.3(2) . . . . ?
C4 C5 C24 C27 -59.7(2) . . . . ?
C6 C5 C24 C26 -121.5(2) . . . . ?
C4 C5 C24 C26 60.4(2) . . . . ?
C6 C5 C24 C25 -0.9(3) . . . . ?
C4 C5 C24 C25 -179.00(18) . . . . ?
C9 C10 C28 C31 -1.4(3) . . . . ?
C11 C10 C28 C31 179.46(18) . . . . ?
C9 C10 C28 C30 118.5(2) . . . . ?
C11 C10 C28 C30 -60.6(2) . . . . ?
C9 C10 C28 C29 -121.3(2) . . . . ?
C11 C10 C28 C29 59.5(2) . . . . ?
C17 C16 C32 C33 -20.4(3) . . . . ?
P1 C16 C32 C33 103.8(2) . . . . ?
C17 C16 C32 C37 158.98(19) . . . . ?
P1 C16 C32 C37 -76.9(2) . . . . ?
C37 C32 C33 C34 -0.5(3) . . . . ?
C16 C32 C33 C34 178.8(2) . . . . ?
C32 C33 C34 C35 0.1(4) . . . . ?
C33 C34 C35 C36 -0.1(4) . . . . ?
C34 C35 C36 C37 0.6(4) . . . . ?
C35 C36 C37 C32 -1.0(3) . . . . ?
C33 C32 C37 C36 1.0(3) . . . . ?
C16 C32 C37 C36 -178.4(2) . . . . ?
C18 C19 C38 C39 132.8(2) . . . . ?
P1 C19 C38 C39 -106.3(2) . . . . ?
C18 C19 C38 C43 -53.1(3) . . . . ?
P1 C19 C38 C43 67.9(3) . . . . ?
C43 C38 C39 C40 0.0(4) . . . . ?
C19 C38 C39 C40 174.2(2) . . . . ?
C38 C39 C40 C41 0.9(4) . . . . ?
C39 C40 C41 C42 -1.3(4) . . . . ?
C40 C41 C42 C43 0.8(4) . . . . ?
C39 C38 C43 C42 -0.5(4) . . . . ?
C19 C38 C43 C42 -174.6(2) . . . . ?
C41 C42 C43 C38 0.0(4) . . . . ?
C21 C20 C44 C45 130.0(2) . . . . ?
P2 C20 C44 C45 -109.1(2) . . . . ?
C21 C20 C44 C49 -49.0(3) . . . . ?
P2 C20 C44 C49 71.8(2) . . . . ?
C49 C44 C45 C46 1.0(3) . . . . ?
C20 C44 C45 C46 -178.1(2) . . . . ?
C44 C45 C46 C47 0.3(4) . . . . ?
C45 C46 C47 C48 -1.4(4) . . . . ?
C46 C47 C48 C49 1.2(4) . . . . ?
C45 C44 C49 C48 -1.2(3) . . . . ?
C20 C44 C49 C48 177.8(2) . . . . ?
C47 C48 C49 C44 0.2(4) . . . . ?
C22 C23 C50 C51 -9.8(3) . . . . ?
P2 C23 C50 C51 111.05(19) . . . . ?
C22 C23 C50 C55 172.66(18) . . . . ?
P2 C23 C50 C55 -66.5(2) . . . . ?
C55 C50 C51 C52 -0.2(3) . . . . ?
C23 C50 C51 C52 -177.77(19) . . . . ?
C50 C51 C52 C53 0.5(3) . . . . ?
C51 C52 C53 C54 -0.4(4) . . . . ?
C52 C53 C54 C55 0.1(3) . . . . ?
C53 C54 C55 C50 0.2(3) . . . . ?
C51 C50 C55 C54 -0.2(3) . . . . ?
C23 C50 C55 C54 177.47(18) . . . . ?

_diffrn_measured_fraction_theta_max 1.000
_diffrn_reflns_theta_full        29.57
_diffrn_measured_fraction_theta_full 1.000
_refine_diff_density_max         0.388
_refine_diff_density_min         -0.275
_refine_diff_density_rms         0.051

_diffrn_ambient_environment      'perfluoro polyether oil'
_diffrn_measurement_device       'three-circle diffractometer'
_diffrn_measurement_specimen_support 'polyimid foil'
_diffrn_detector                 'CCD plate'
_diffrn_detector_type            CCD-PXL-KAF2


#==end==


data_complex_8
_audit_creation_method
;
CrysAlisPro, Oxford Diffraction Ltd.,
Version 1.171.35.21 (release 20-01-2012 CrysAlis171 .NET)
(compiled Jan 23 2012,18:06:46)
;
_audit_block_code                ga_ng23a
_audit_block_refno               1524
_audit_update_record             'Tue Jun 19 11:38:13 CEST 2012'
_audit_block_usercomment         'NG-265-1, red,plate'


_chemical_name_systematic        ?
_chemical_name_common            ?
_chemical_formula_moiety         ?
_chemical_formula_sum            'C50 H54 Cl N O P2 Pd'
_chemical_melting_point          ?

_exptl_crystal_description       plate
_exptl_crystal_colour            red
_diffrn_ambient_temperature      110.00(10)
_chemical_formula_weight         888.73

loop_
_atom_type_symbol
_atom_type_description
_atom_type_scat_dispersion_real
_atom_type_scat_dispersion_imag
_atom_type_scat_source
C C 0.0181 0.0091 'International Tables Vol C Tables 4.2.6.8 and 6.1.1.4'
H H 0.0000 0.0000 'International Tables Vol C Tables 4.2.6.8 and 6.1.1.4'
Cl Cl 0.3639 0.7018 'International Tables Vol C Tables 4.2.6.8 and 6.1.1.4'
N N 0.0311 0.0180 'International Tables Vol C Tables 4.2.6.8 and 6.1.1.4'
O O 0.0492 0.0322 'International Tables Vol C Tables 4.2.6.8 and 6.1.1.4'
P P 0.2955 0.4335 'International Tables Vol C Tables 4.2.6.8 and 6.1.1.4'
Pd Pd 0.1215 3.9337 'International Tables Vol C Tables 4.2.6.8 and 6.1.1.4'

_symmetry_cell_setting           triclinic
_symmetry_space_group_name_H-M   'P -1'
_symmetry_int_tables_number      2
_chemical_absolute_configuration .

loop_
_symmetry_equiv_pos_as_xyz
'x, y, z'
'-x, -y, -z'

_cell_length_a                   12.7237(4)
_cell_length_b                   13.9205(5)
_cell_length_c                   14.7922(4)
_cell_angle_alpha                63.244(3)
_cell_angle_beta                 75.697(3)
_cell_angle_gamma                68.328(3)
_cell_volume                     2163.78(12)
_cell_formula_units_Z            2
_cell_measurement_temperature    110.00(10)
_cell_measurement_reflns_used    18751
_cell_measurement_theta_min      3.7225
_cell_measurement_theta_max      71.7495
_exptl_crystal_size_max          0.1636
_exptl_crystal_size_mid          0.0631
_exptl_crystal_size_min          0.0248
_exptl_crystal_density_meas      ?
_exptl_crystal_density_diffrn    1.364
_exptl_crystal_density_method    'not measured'
_exptl_crystal_F_000             924
_exptl_absorpt_coefficient_mu    5.010
_exptl_absorpt_correction_type   gaussian
_exptl_absorpt_correction_T_min  0.539
_exptl_absorpt_correction_T_max  0.886
_exptl_absorpt_process_details
;
CrysAlisPro, Agilent Technologies,
Version 1.171.35.21 (release 20-01-2012 CrysAlis171 .NET)
(compiled Jan 23 2012,18:06:46)
Numerical absorption correction based on gaussian integration over
			a multifaceted crystal model
;

_exptl_special_details
;
 ?
;
_diffrn_radiation_probe          x-ray
_diffrn_radiation_type           'Cu K\a'
_diffrn_radiation_wavelength     1.5418
_diffrn_source                   'Agilent SuperNova (Cu) X-ray Source'
_diffrn_radiation_monochromator  mirror
_diffrn_measurement_device_type  'Agilent SuperNova, Dual, Cu at zero, Eos'
_diffrn_measurement_method       '\w scans'
_diffrn_detector_area_resol_mean 15.9241
_diffrn_reflns_number            56830
_diffrn_reflns_av_R_equivalents  0.0668
_diffrn_reflns_av_sigmaI/netI    0.1311
_diffrn_reflns_limit_h_min       -15
_diffrn_reflns_limit_h_max       13
_diffrn_reflns_limit_k_min       -17
_diffrn_reflns_limit_k_max       17
_diffrn_reflns_limit_l_min       -18
_diffrn_reflns_limit_l_max       18
_diffrn_reflns_theta_min         3.7225
_diffrn_reflns_theta_max         71.7495
_reflns_number_total             8291
_reflns_number_gt                7423
_reflns_threshold_expression     >2sigma(I)
_computing_data_collection
;
CrysAlisPro, Agilent Technologies,
Version 1.171.35.21 (release 20-01-2012 CrysAlis171 .NET)
(compiled Jan 23 2012,18:06:46)
;
_computing_cell_refinement
;
CrysAlisPro, Agilent Technologies,
Version 1.171.35.21 (release 20-01-2012 CrysAlis171 .NET)
(compiled Jan 23 2012,18:06:46)
;
_computing_data_reduction
;
CrysAlisPro, Agilent Technologies,
Version 1.171.35.21 (release 20-01-2012 CrysAlis171 .NET)
(compiled Jan 23 2012,18:06:46)
;
_computing_structure_solution    'SUPERFLIP (Palatinus, 2007-2009)'
_computing_structure_refinement  'SHELXL-97 (Sheldrick, 1997)'
_computing_molecular_graphics    ?
_computing_publication_material  'SHELXL-97 (Sheldrick, 1997)'

_refine_special_details
;
 Refinement of F^2^ against ALL reflections.  The weighted R-factor wR and
 goodness of fit S are based on F^2^, conventional R-factors R are based
 on F, with F set to zero for negative F^2^. The threshold expression of
 F^2^ > 2sigma(F^2^) is used only for calculating R-factors(gt) etc. and is
 not relevant to the choice of reflections for refinement.  R-factors based
 on F^2^ are statistically about twice as large as those based on F, and R-
 factors based on ALL data will be even larger.
;

_refine_ls_structure_factor_coef Fsqd
_refine_ls_matrix_type           full
_refine_ls_weighting_scheme      calc
_refine_ls_weighting_details
'calc w=1/[\s^2^(Fo^2^)+(0.0357P)^2^+1.7061P] where P=(Fo^2^+2Fc^2^)/3'
_atom_sites_solution_primary     iterative
_atom_sites_solution_secondary   difmap
_atom_sites_solution_hydrogens   geom
_refine_ls_hydrogen_treatment    constr
_refine_ls_extinction_method     none
_refine_ls_extinction_coef       ?
_refine_ls_number_reflns         8291
_refine_ls_number_parameters     511
_refine_ls_number_restraints     0
_refine_ls_R_factor_all          0.0366
_refine_ls_R_factor_gt           0.0309
_refine_ls_wR_factor_ref         0.0770
_refine_ls_wR_factor_gt          0.0742
_refine_ls_goodness_of_fit_ref   1.020
_refine_ls_restrained_S_all      1.020
_refine_ls_shift/su_max          0.001
_refine_ls_shift/su_mean         0.000

loop_
_atom_site_label
_atom_site_type_symbol
_atom_site_fract_x
_atom_site_fract_y
_atom_site_fract_z
_atom_site_U_iso_or_equiv
_atom_site_adp_type
_atom_site_occupancy
_atom_site_symmetry_multiplicity
_atom_site_calc_flag
_atom_site_refinement_flags
_atom_site_disorder_assembly
_atom_site_disorder_group
Pd Pd 0.230961(15) 0.265801(13) 0.821774(11) 0.01237(6) Uani 1 1 d . . .
Cl Cl 0.18937(5) 0.40947(5) 0.66272(4) 0.01996(13) Uani 1 1 d . . .
P1 P 0.41947(5) 0.25909(5) 0.77261(4) 0.01216(12) Uani 1 1 d . . .
P2 P 0.04226(5) 0.26827(5) 0.85509(4) 0.01274(12) Uani 1 1 d . . .
N1 N 0.26516(17) 0.15607(15) 0.97059(13) 0.0119(4) Uani 1 1 d . . .
C2 C 0.1785(2) 0.15557(18) 1.05075(16) 0.0125(5) Uani 1 1 d . . .
C3 C 0.0666(2) 0.15533(18) 1.05763(17) 0.0140(5) Uani 1 1 d . . .
C4 C -0.0044(2) 0.15963(19) 1.14410(17) 0.0150(5) Uani 1 1 d . . .
H4 H -0.0811 0.1631 1.1474 0.018 Uiso 1 1 calc R . .
C5 C 0.0309(2) 0.15918(19) 1.22782(17) 0.0153(5) Uani 1 1 d . . .
C6 C 0.1437(2) 0.15096(19) 1.22374(17) 0.0140(5) Uani 1 1 d . . .
H6 H 0.1713 0.1464 1.2800 0.017 Uiso 1 1 calc R . .
C7 C 0.2165(2) 0.14937(18) 1.13608(17) 0.0131(5) Uani 1 1 d . . .
C8 C 0.3341(2) 0.14408(18) 1.10937(16) 0.0128(4) Uani 1 1 d . . .
C9 C 0.4156(2) 0.13704(18) 1.16230(16) 0.0138(5) Uani 1 1 d . . .
H9 H 0.3954 0.1372 1.2285 0.017 Uiso 1 1 calc R . .
C10 C 0.5260(2) 0.12989(18) 1.11760(17) 0.0140(5) Uani 1 1 d . . .
C11 C 0.5518(2) 0.12861(18) 1.01928(17) 0.0140(5) Uani 1 1 d . . .
H11 H 0.6278 0.1223 0.9888 0.017 Uiso 1 1 calc R . .
C12 C 0.4730(2) 0.13600(18) 0.96530(16) 0.0134(5) Uani 1 1 d . . .
C13 C 0.3601(2) 0.14722(18) 1.00945(16) 0.0123(4) Uani 1 1 d . . .
C14 C 0.5064(2) 0.13040(18) 0.86259(16) 0.0138(5) Uani 1 1 d . . .
H14A H 0.4932 0.0636 0.8647 0.017 Uiso 1 1 calc R . .
H14B H 0.5880 0.1245 0.8420 0.017 Uiso 1 1 calc R . .
C15 C 0.0257(2) 0.14864(19) 0.97411(16) 0.0141(5) Uani 1 1 d . . .
H15A H -0.0552 0.1507 0.9912 0.017 Uiso 1 1 calc R . .
H15B H 0.0704 0.0770 0.9665 0.017 Uiso 1 1 calc R . .
C16 C -0.0570(2) 0.1717(2) 1.31752(18) 0.0193(5) Uani 1 1 d . . .
C17 C -0.1408(3) 0.2910(2) 1.2802(2) 0.0358(7) Uani 1 1 d . . .
H17A H -0.1000 0.3464 1.2591 0.054 Uiso 1 1 calc R . .
H17B H -0.1998 0.2991 1.3353 0.054 Uiso 1 1 calc R . .
H17C H -0.1760 0.3037 1.2223 0.054 Uiso 1 1 calc R . .
C18 C -0.1212(3) 0.0854(2) 1.3565(2) 0.0278(6) Uani 1 1 d . . .
H18A H -0.1624 0.0983 1.3023 0.042 Uiso 1 1 calc R . .
H18B H -0.1753 0.0929 1.4147 0.042 Uiso 1 1 calc R . .
H18C H -0.0673 0.0094 1.3777 0.042 Uiso 1 1 calc R . .
C19 C 0.0009(3) 0.1544(3) 1.4055(2) 0.0349(7) Uani 1 1 d . . .
H19A H 0.0592 0.0809 1.4258 0.052 Uiso 1 1 calc R . .
H19B H -0.0558 0.1571 1.4634 0.052 Uiso 1 1 calc R . .
H19C H 0.0364 0.2141 1.3834 0.052 Uiso 1 1 calc R . .
C20 C 0.6199(2) 0.1234(2) 1.16972(18) 0.0175(5) Uani 1 1 d . . .
C21 C 0.6635(3) 0.2252(2) 1.1027(2) 0.0291(6) Uani 1 1 d . . .
H21A H 0.6986 0.2202 1.0374 0.044 Uiso 1 1 calc R . .
H21B H 0.7199 0.2260 1.1369 0.044 Uiso 1 1 calc R . .
H21C H 0.5998 0.2947 1.0908 0.044 Uiso 1 1 calc R . .
C22 C 0.5759(2) 0.1264(3) 1.2749(2) 0.0273(6) Uani 1 1 d . . .
H22A H 0.5129 0.1954 1.2682 0.041 Uiso 1 1 calc R . .
H22B H 0.6374 0.1251 1.3048 0.041 Uiso 1 1 calc R . .
H22C H 0.5493 0.0606 1.3190 0.041 Uiso 1 1 calc R . .
C23 C 0.7176(2) 0.0140(2) 1.1828(2) 0.0275(6) Uani 1 1 d . . .
H23A H 0.6896 -0.0509 1.2269 0.041 Uiso 1 1 calc R . .
H23B H 0.7785 0.0124 1.2136 0.041 Uiso 1 1 calc R . .
H23C H 0.7471 0.0106 1.1162 0.041 Uiso 1 1 calc R . .
C24 C 0.4795(2) 0.2554(2) 0.64893(17) 0.0159(5) Uani 1 1 d . . .
C25 C 0.4699(2) 0.3554(2) 0.56217(19) 0.0244(6) Uani 1 1 d . . .
H25 H 0.4305 0.4257 0.5673 0.029 Uiso 1 1 calc R . .
C26 C 0.5179(3) 0.3519(2) 0.46841(19) 0.0287(6) Uani 1 1 d . . .
H26 H 0.5122 0.4202 0.4095 0.034 Uiso 1 1 calc R . .
C27 C 0.5741(3) 0.2496(2) 0.46008(19) 0.0287(6) Uani 1 1 d . . .
H27 H 0.6063 0.2476 0.3955 0.034 Uiso 1 1 calc R . .
C28 C 0.5831(3) 0.1510(2) 0.5453(2) 0.0314(7) Uani 1 1 d . . .
H28 H 0.6217 0.0808 0.5396 0.038 Uiso 1 1 calc R . .
C29 C 0.5361(2) 0.1531(2) 0.64015(19) 0.0242(6) Uani 1 1 d . . .
H29 H 0.5428 0.0846 0.6989 0.029 Uiso 1 1 calc R . .
C30 C 0.4609(2) 0.36867(19) 0.77670(16) 0.0155(5) Uani 1 1 d . . .
C31 C 0.5750(2) 0.3662(2) 0.75467(19) 0.0210(5) Uani 1 1 d . . .
H31 H 0.6293 0.3111 0.7321 0.025 Uiso 1 1 calc R . .
C32 C 0.6090(2) 0.4436(2) 0.7656(2) 0.0258(6) Uani 1 1 d . . .
H32 H 0.6865 0.4419 0.7503 0.031 Uiso 1 1 calc R . .
C33 C 0.5297(3) 0.5239(2) 0.7990(2) 0.0251(6) Uani 1 1 d . . .
H33 H 0.5530 0.5765 0.8074 0.030 Uiso 1 1 calc R . .
C34 C 0.4165(2) 0.5270(2) 0.8201(2) 0.0244(6) Uani 1 1 d . . .
H34 H 0.3623 0.5824 0.8425 0.029 Uiso 1 1 calc R . .
C35 C 0.3819(2) 0.4497(2) 0.80884(18) 0.0190(5) Uani 1 1 d . . .
H35 H 0.3041 0.4524 0.8232 0.023 Uiso 1 1 calc R . .
C36 C -0.0259(2) 0.2596(2) 0.76520(17) 0.0167(5) Uani 1 1 d . . .
C37 C -0.0479(2) 0.1607(2) 0.78375(19) 0.0216(5) Uani 1 1 d . . .
H37 H -0.0232 0.0948 0.8426 0.026 Uiso 1 1 calc R . .
C38 C -0.1058(2) 0.1581(2) 0.7167(2) 0.0275(6) Uani 1 1 d . . .
H38 H -0.1215 0.0909 0.7305 0.033 Uiso 1 1 calc R . .
C39 C -0.1403(2) 0.2534(2) 0.6299(2) 0.0282(6) Uani 1 1 d . . .
H39 H -0.1799 0.2516 0.5842 0.034 Uiso 1 1 calc R . .
C40 C -0.1174(2) 0.3515(2) 0.60960(19) 0.0265(6) Uani 1 1 d . . .
H40 H -0.1405 0.4166 0.5497 0.032 Uiso 1 1 calc R . .
C41 C -0.0605(2) 0.3547(2) 0.67675(19) 0.0223(5) Uani 1 1 d . . .
H41 H -0.0449 0.4222 0.6624 0.027 Uiso 1 1 calc R . .
C42 C -0.0546(2) 0.38894(19) 0.88012(16) 0.0158(5) Uani 1 1 d . . .
C43 C -0.0135(2) 0.4694(2) 0.87903(19) 0.0216(5) Uani 1 1 d . . .
H43 H 0.0647 0.4643 0.8598 0.026 Uiso 1 1 calc R . .
C44 C -0.0866(2) 0.5571(2) 0.90596(19) 0.0241(6) Uani 1 1 d . . .
H44 H -0.0582 0.6121 0.9047 0.029 Uiso 1 1 calc R . .
C45 C -0.2006(2) 0.5648(2) 0.93467(19) 0.0248(6) Uani 1 1 d . . .
H45 H -0.2502 0.6244 0.9539 0.030 Uiso 1 1 calc R . .
C46 C -0.2422(2) 0.4855(2) 0.93534(19) 0.0255(6) Uani 1 1 d . . .
H46 H -0.3204 0.4906 0.9550 0.031 Uiso 1 1 calc R . .
C47 C -0.1697(2) 0.3984(2) 0.90728(18) 0.0196(5) Uani 1 1 d . . .
H47 H -0.1989 0.3451 0.9066 0.024 Uiso 1 1 calc R . .
O O 0.2797(2) 0.1839(2) 0.38986(18) 0.0474(6) Uani 1 1 d . . .
C51 C 0.2904(3) 0.1371(3) 0.4950(3) 0.0429(8) Uani 1 1 d . . .
H51A H 0.3677 0.1275 0.5066 0.052 Uiso 1 1 calc R . .
H51B H 0.2772 0.0623 0.5280 0.052 Uiso 1 1 calc R . .
C52 C 0.2040(4) 0.2160(3) 0.5380(3) 0.0615(13) Uani 1 1 d . . .
H52A H 0.2357 0.2228 0.5889 0.074 Uiso 1 1 calc R . .
H52B H 0.1361 0.1898 0.5708 0.074 Uiso 1 1 calc R . .
C53 C 0.1744(4) 0.3267(3) 0.4480(3) 0.0544(11) Uani 1 1 d . . .
H53A H 0.0926 0.3527 0.4388 0.065 Uiso 1 1 calc R . .
H53B H 0.1930 0.3852 0.4562 0.065 Uiso 1 1 calc R . .
C54 C 0.2463(4) 0.3016(4) 0.3596(3) 0.0607(11) Uani 1 1 d . . .
H54A H 0.2022 0.3400 0.2998 0.073 Uiso 1 1 calc R . .
H54B H 0.3139 0.3282 0.3411 0.073 Uiso 1 1 calc R . .

loop_
_atom_site_aniso_label
_atom_site_aniso_U_11
_atom_site_aniso_U_22
_atom_site_aniso_U_33
_atom_site_aniso_U_23
_atom_site_aniso_U_13
_atom_site_aniso_U_12
Pd 0.01320(10) 0.01442(9) 0.01045(8) -0.00520(6) -0.00034(6) -0.00538(6)
Cl 0.0186(3) 0.0246(3) 0.0117(2) -0.0021(2) -0.0027(2) -0.0071(2)
P1 0.0131(3) 0.0136(3) 0.0104(2) -0.0057(2) 0.0012(2) -0.0051(2)
P2 0.0131(3) 0.0151(3) 0.0115(2) -0.0057(2) -0.0016(2) -0.0050(2)
N1 0.0097(10) 0.0161(9) 0.0106(8) -0.0052(7) 0.0008(7) -0.0057(8)
C2 0.0153(12) 0.0117(10) 0.0111(10) -0.0046(8) -0.0007(9) -0.0051(9)
C3 0.0153(12) 0.0128(10) 0.0136(10) -0.0037(8) -0.0034(9) -0.0046(9)
C4 0.0114(12) 0.0182(11) 0.0166(10) -0.0063(9) -0.0021(9) -0.0063(9)
C5 0.0158(13) 0.0170(11) 0.0154(10) -0.0076(9) 0.0021(9) -0.0082(9)
C6 0.0150(12) 0.0170(11) 0.0132(10) -0.0074(8) -0.0006(9) -0.0068(9)
C7 0.0139(12) 0.0127(10) 0.0149(10) -0.0062(8) -0.0018(9) -0.0052(9)
C8 0.0129(12) 0.0129(10) 0.0137(10) -0.0064(8) 0.0002(8) -0.0045(9)
C9 0.0162(13) 0.0132(10) 0.0145(10) -0.0082(8) -0.0002(9) -0.0044(9)
C10 0.0142(12) 0.0127(10) 0.0184(11) -0.0084(9) -0.0033(9) -0.0036(9)
C11 0.0119(12) 0.0152(10) 0.0155(10) -0.0066(8) 0.0016(9) -0.0059(9)
C12 0.0152(12) 0.0120(10) 0.0118(10) -0.0051(8) -0.0007(9) -0.0026(9)
C13 0.0139(12) 0.0106(10) 0.0123(10) -0.0042(8) -0.0025(8) -0.0033(9)
C14 0.0138(12) 0.0132(10) 0.0122(10) -0.0043(8) -0.0001(8) -0.0033(9)
C15 0.0142(12) 0.0159(11) 0.0145(10) -0.0060(9) -0.0018(9) -0.0069(9)
C16 0.0154(13) 0.0277(13) 0.0190(11) -0.0130(10) 0.0013(10) -0.0080(10)
C17 0.0279(17) 0.0319(15) 0.0378(16) -0.0173(13) 0.0113(13) -0.0033(13)
C18 0.0280(16) 0.0376(15) 0.0216(12) -0.0141(11) 0.0081(11) -0.0178(13)
C19 0.0248(16) 0.070(2) 0.0242(13) -0.0305(14) 0.0096(12) -0.0226(15)
C20 0.0141(13) 0.0214(12) 0.0228(12) -0.0136(10) -0.0034(10) -0.0043(10)
C21 0.0255(16) 0.0325(15) 0.0390(15) -0.0153(12) -0.0057(12) -0.0159(12)
C22 0.0201(15) 0.0446(16) 0.0298(14) -0.0250(12) -0.0039(11) -0.0093(12)
C23 0.0208(15) 0.0311(14) 0.0393(15) -0.0230(12) -0.0139(12) 0.0013(12)
C24 0.0157(13) 0.0221(12) 0.0132(10) -0.0095(9) 0.0025(9) -0.0085(10)
C25 0.0314(16) 0.0206(12) 0.0183(12) -0.0082(10) 0.0012(11) -0.0065(11)
C26 0.0434(19) 0.0282(14) 0.0133(11) -0.0053(10) 0.0018(11) -0.0159(13)
C27 0.0389(18) 0.0395(16) 0.0171(12) -0.0177(11) 0.0082(11) -0.0206(13)
C28 0.0446(19) 0.0281(14) 0.0259(13) -0.0195(12) 0.0080(13) -0.0117(13)
C29 0.0338(16) 0.0202(12) 0.0189(12) -0.0096(10) 0.0058(11) -0.0115(11)
C30 0.0179(13) 0.0168(11) 0.0124(10) -0.0058(8) 0.0002(9) -0.0071(10)
C31 0.0175(14) 0.0192(12) 0.0261(12) -0.0108(10) 0.0015(10) -0.0053(10)
C32 0.0196(15) 0.0285(14) 0.0321(14) -0.0105(11) -0.0018(11) -0.0127(11)
C33 0.0317(16) 0.0240(13) 0.0282(13) -0.0116(11) -0.0055(11) -0.0144(12)
C34 0.0286(16) 0.0241(13) 0.0262(13) -0.0161(11) -0.0019(11) -0.0067(11)
C35 0.0186(14) 0.0221(12) 0.0192(11) -0.0107(10) 0.0004(10) -0.0072(10)
C36 0.0136(13) 0.0240(12) 0.0163(10) -0.0127(9) -0.0008(9) -0.0040(10)
C37 0.0227(14) 0.0242(12) 0.0231(12) -0.0146(10) -0.0061(10) -0.0036(11)
C38 0.0271(16) 0.0305(14) 0.0364(15) -0.0231(12) -0.0056(12) -0.0068(12)
C39 0.0238(15) 0.0423(16) 0.0294(13) -0.0265(12) -0.0080(11) -0.0024(12)
C40 0.0255(15) 0.0344(14) 0.0200(12) -0.0142(11) -0.0072(11) -0.0016(12)
C41 0.0214(14) 0.0261(13) 0.0195(11) -0.0102(10) -0.0029(10) -0.0052(11)
C42 0.0181(13) 0.0171(11) 0.0122(10) -0.0061(8) -0.0031(9) -0.0039(9)
C43 0.0222(14) 0.0220(12) 0.0228(12) -0.0101(10) -0.0017(10) -0.0079(11)
C44 0.0314(16) 0.0182(12) 0.0259(12) -0.0109(10) -0.0027(11) -0.0082(11)
C45 0.0307(16) 0.0193(12) 0.0216(12) -0.0116(10) -0.0010(11) -0.0009(11)
C46 0.0202(14) 0.0267(13) 0.0231(12) -0.0090(10) 0.0028(10) -0.0045(11)
C47 0.0181(14) 0.0205(12) 0.0213(11) -0.0098(10) 0.0003(10) -0.0064(10)
O 0.0395(14) 0.0757(18) 0.0438(13) -0.0427(13) 0.0063(11) -0.0178(13)
C51 0.046(2) 0.0381(17) 0.0456(18) -0.0178(15) -0.0062(16) -0.0104(15)
C52 0.114(4) 0.0317(17) 0.0265(16) -0.0145(14) -0.0011(19) -0.009(2)
C53 0.085(3) 0.0319(17) 0.0434(19) -0.0150(15) -0.014(2) -0.0091(18)
C54 0.074(3) 0.075(3) 0.0279(16) -0.0024(17) -0.0003(18) -0.043(2)

_geom_special_details
;
 All esds (except the esd in the dihedral angle between two l.s. planes)
 are estimated using the full covariance matrix.  The cell esds are taken
 into account individually in the estimation of esds in distances, angles
 and torsion angles; correlations between esds in cell parameters are only
 used when they are defined by crystal symmetry.  An approximate (isotropic)
 treatment of cell esds is used for estimating esds involving l.s. planes.
;

loop_
_geom_bond_atom_site_label_1
_geom_bond_atom_site_label_2
_geom_bond_distance
_geom_bond_site_symmetry_2
_geom_bond_publ_flag
Pd N1 2.0792(18) . ?
Pd P1 2.3075(6) . ?
Pd P2 2.3191(6) . ?
Pd Cl 2.3264(6) . ?
P1 C24 1.816(2) . ?
P1 C30 1.817(2) . ?
P1 C14 1.822(2) . ?
P2 C42 1.812(2) . ?
P2 C36 1.825(2) . ?
P2 C15 1.831(2) . ?
N1 C13 1.405(3) . ?
N1 C2 1.405(3) . ?
C2 C3 1.403(4) . ?
C2 C7 1.417(3) . ?
C3 C4 1.383(3) . ?
C3 C15 1.505(3) . ?
C4 C5 1.414(3) . ?
C4 H4 0.9500 . ?
C5 C6 1.385(4) . ?
C5 C16 1.541(3) . ?
C6 C7 1.399(3) . ?
C6 H6 0.9500 . ?
C7 C8 1.433(3) . ?
C8 C9 1.398(3) . ?
C8 C13 1.417(3) . ?
C9 C10 1.385(3) . ?
C9 H9 0.9500 . ?
C10 C11 1.416(3) . ?
C10 C20 1.531(3) . ?
C11 C12 1.379(3) . ?
C11 H11 0.9500 . ?
C12 C13 1.406(3) . ?
C12 C14 1.503(3) . ?
C14 H14A 0.9900 . ?
C14 H14B 0.9900 . ?
C15 H15A 0.9900 . ?
C15 H15B 0.9900 . ?
C16 C18 1.520(4) . ?
C16 C19 1.535(4) . ?
C16 C17 1.535(4) . ?
C17 H17A 0.9800 . ?
C17 H17B 0.9800 . ?
C17 H17C 0.9800 . ?
C18 H18A 0.9800 . ?
C18 H18B 0.9800 . ?
C18 H18C 0.9800 . ?
C19 H19A 0.9800 . ?
C19 H19B 0.9800 . ?
C19 H19C 0.9800 . ?
C20 C21 1.531(4) . ?
C20 C22 1.532(3) . ?
C20 C23 1.536(3) . ?
C21 H21A 0.9800 . ?
C21 H21B 0.9800 . ?
C21 H21C 0.9800 . ?
C22 H22A 0.9800 . ?
C22 H22B 0.9800 . ?
C22 H22C 0.9800 . ?
C23 H23A 0.9800 . ?
C23 H23B 0.9800 . ?
C23 H23C 0.9800 . ?
C24 C29 1.388(3) . ?
C24 C25 1.394(3) . ?
C25 C26 1.385(3) . ?
C25 H25 0.9500 . ?
C26 C27 1.385(4) . ?
C26 H26 0.9500 . ?
C27 C28 1.373(4) . ?
C27 H27 0.9500 . ?
C28 C29 1.391(3) . ?
C28 H28 0.9500 . ?
C29 H29 0.9500 . ?
C30 C35 1.384(3) . ?
C30 C31 1.398(4) . ?
C31 C32 1.383(4) . ?
C31 H31 0.9500 . ?
C32 C33 1.389(4) . ?
C32 H32 0.9500 . ?
C33 C34 1.384(4) . ?
C33 H33 0.9500 . ?
C34 C35 1.390(4) . ?
C34 H34 0.9500 . ?
C35 H35 0.9500 . ?
C36 C37 1.397(4) . ?
C36 C41 1.398(3) . ?
C37 C38 1.394(4) . ?
C37 H37 0.9500 . ?
C38 C39 1.384(4) . ?
C38 H38 0.9500 . ?
C39 C40 1.387(4) . ?
C39 H39 0.9500 . ?
C40 C41 1.390(4) . ?
C40 H40 0.9500 . ?
C41 H41 0.9500 . ?
C42 C47 1.393(4) . ?
C42 C43 1.393(4) . ?
C43 C44 1.389(3) . ?
C43 H43 0.9500 . ?
C44 C45 1.385(4) . ?
C44 H44 0.9500 . ?
C45 C46 1.385(4) . ?
C45 H45 0.9500 . ?
C46 C47 1.389(3) . ?
C46 H46 0.9500 . ?
C47 H47 0.9500 . ?
O C54 1.408(5) . ?
O C51 1.410(4) . ?
C51 C52 1.488(5) . ?
C51 H51A 0.9900 . ?
C51 H51B 0.9900 . ?
C52 C53 1.504(5) . ?
C52 H52A 0.9900 . ?
C52 H52B 0.9900 . ?
C53 C54 1.501(5) . ?
C53 H53A 0.9900 . ?
C53 H53B 0.9900 . ?
C54 H54A 0.9900 . ?
C54 H54B 0.9900 . ?

loop_
_geom_angle_atom_site_label_1
_geom_angle_atom_site_label_2
_geom_angle_atom_site_label_3
_geom_angle
_geom_angle_site_symmetry_1
_geom_angle_site_symmetry_3
_geom_angle_publ_flag
N1 Pd P1 91.78(6) . . ?
N1 Pd P2 92.50(6) . . ?
P1 Pd P2 173.39(2) . . ?
N1 Pd Cl 171.60(5) . . ?
P1 Pd Cl 87.97(2) . . ?
P2 Pd Cl 88.53(2) . . ?
C24 P1 C30 104.95(11) . . ?
C24 P1 C14 104.51(11) . . ?
C30 P1 C14 102.92(11) . . ?
C24 P1 Pd 118.00(8) . . ?
C30 P1 Pd 116.17(8) . . ?
C14 P1 Pd 108.69(8) . . ?
C42 P2 C36 104.19(11) . . ?
C42 P2 C15 103.24(10) . . ?
C36 P2 C15 104.21(11) . . ?
C42 P2 Pd 113.90(9) . . ?
C36 P2 Pd 120.64(8) . . ?
C15 P2 Pd 108.94(8) . . ?
C13 N1 C2 103.86(18) . . ?
C13 N1 Pd 120.43(14) . . ?
C2 N1 Pd 120.15(15) . . ?
C3 C2 N1 129.3(2) . . ?
C3 C2 C7 118.6(2) . . ?
N1 C2 C7 112.0(2) . . ?
C4 C3 C2 118.1(2) . . ?
C4 C3 C15 121.0(2) . . ?
C2 C3 C15 120.9(2) . . ?
C3 C4 C5 123.7(2) . . ?
C3 C4 H4 118.1 . . ?
C5 C4 H4 118.1 . . ?
C6 C5 C4 117.9(2) . . ?
C6 C5 C16 122.7(2) . . ?
C4 C5 C16 119.4(2) . . ?
C5 C6 C7 119.5(2) . . ?
C5 C6 H6 120.3 . . ?
C7 C6 H6 120.3 . . ?
C6 C7 C2 121.9(2) . . ?
C6 C7 C8 132.0(2) . . ?
C2 C7 C8 106.12(19) . . ?
C9 C8 C13 122.0(2) . . ?
C9 C8 C7 132.2(2) . . ?
C13 C8 C7 105.8(2) . . ?
C10 C9 C8 119.6(2) . . ?
C10 C9 H9 120.2 . . ?
C8 C9 H9 120.2 . . ?
C9 C10 C11 117.8(2) . . ?
C9 C10 C20 122.9(2) . . ?
C11 C10 C20 119.3(2) . . ?
C12 C11 C10 123.7(2) . . ?
C12 C11 H11 118.1 . . ?
C10 C11 H11 118.1 . . ?
C11 C12 C13 118.3(2) . . ?
C11 C12 C14 121.2(2) . . ?
C13 C12 C14 120.5(2) . . ?
N1 C13 C12 129.2(2) . . ?
N1 C13 C8 112.2(2) . . ?
C12 C13 C8 118.5(2) . . ?
C12 C14 P1 107.47(15) . . ?
C12 C14 H14A 110.2 . . ?
P1 C14 H14A 110.2 . . ?
C12 C14 H14B 110.2 . . ?
P1 C14 H14B 110.2 . . ?
H14A C14 H14B 108.5 . . ?
C3 C15 P2 108.90(16) . . ?
C3 C15 H15A 109.9 . . ?
P2 C15 H15A 109.9 . . ?
C3 C15 H15B 109.9 . . ?
P2 C15 H15B 109.9 . . ?
H15A C15 H15B 108.3 . . ?
C18 C16 C19 108.5(2) . . ?
C18 C16 C17 109.6(2) . . ?
C19 C16 C17 109.0(2) . . ?
C18 C16 C5 110.3(2) . . ?
C19 C16 C5 111.0(2) . . ?
C17 C16 C5 108.4(2) . . ?
C16 C17 H17A 109.5 . . ?
C16 C17 H17B 109.5 . . ?
H17A C17 H17B 109.5 . . ?
C16 C17 H17C 109.5 . . ?
H17A C17 H17C 109.5 . . ?
H17B C17 H17C 109.5 . . ?
C16 C18 H18A 109.5 . . ?
C16 C18 H18B 109.5 . . ?
H18A C18 H18B 109.5 . . ?
C16 C18 H18C 109.5 . . ?
H18A C18 H18C 109.5 . . ?
H18B C18 H18C 109.5 . . ?
C16 C19 H19A 109.5 . . ?
C16 C19 H19B 109.5 . . ?
H19A C19 H19B 109.5 . . ?
C16 C19 H19C 109.5 . . ?
H19A C19 H19C 109.5 . . ?
H19B C19 H19C 109.5 . . ?
C21 C20 C10 108.0(2) . . ?
C21 C20 C22 108.8(2) . . ?
C10 C20 C22 111.7(2) . . ?
C21 C20 C23 109.8(2) . . ?
C10 C20 C23 110.3(2) . . ?
C22 C20 C23 108.3(2) . . ?
C20 C21 H21A 109.5 . . ?
C20 C21 H21B 109.5 . . ?
H21A C21 H21B 109.5 . . ?
C20 C21 H21C 109.5 . . ?
H21A C21 H21C 109.5 . . ?
H21B C21 H21C 109.5 . . ?
C20 C22 H22A 109.5 . . ?
C20 C22 H22B 109.5 . . ?
H22A C22 H22B 109.5 . . ?
C20 C22 H22C 109.5 . . ?
H22A C22 H22C 109.5 . . ?
H22B C22 H22C 109.5 . . ?
C20 C23 H23A 109.5 . . ?
C20 C23 H23B 109.5 . . ?
H23A C23 H23B 109.5 . . ?
C20 C23 H23C 109.5 . . ?
H23A C23 H23C 109.5 . . ?
H23B C23 H23C 109.5 . . ?
C29 C24 C25 119.5(2) . . ?
C29 C24 P1 120.28(18) . . ?
C25 C24 P1 120.26(18) . . ?
C26 C25 C24 119.9(2) . . ?
C26 C25 H25 120.0 . . ?
C24 C25 H25 120.0 . . ?
C25 C26 C27 120.4(2) . . ?
C25 C26 H26 119.8 . . ?
C27 C26 H26 119.8 . . ?
C28 C27 C26 119.8(2) . . ?
C28 C27 H27 120.1 . . ?
C26 C27 H27 120.1 . . ?
C27 C28 C29 120.4(2) . . ?
C27 C28 H28 119.8 . . ?
C29 C28 H28 119.8 . . ?
C24 C29 C28 120.0(2) . . ?
C24 C29 H29 120.0 . . ?
C28 C29 H29 120.0 . . ?
C35 C30 C31 119.6(2) . . ?
C35 C30 P1 120.5(2) . . ?
C31 C30 P1 119.68(18) . . ?
C32 C31 C30 120.2(2) . . ?
C32 C31 H31 119.9 . . ?
C30 C31 H31 119.9 . . ?
C31 C32 C33 119.9(3) . . ?
C31 C32 H32 120.1 . . ?
C33 C32 H32 120.1 . . ?
C34 C33 C32 120.0(2) . . ?
C34 C33 H33 120.0 . . ?
C32 C33 H33 120.0 . . ?
C33 C34 C35 120.3(2) . . ?
C33 C34 H34 119.8 . . ?
C35 C34 H34 119.8 . . ?
C30 C35 C34 120.0(2) . . ?
C30 C35 H35 120.0 . . ?
C34 C35 H35 120.0 . . ?
C37 C36 C41 118.7(2) . . ?
C37 C36 P2 121.69(19) . . ?
C41 C36 P2 119.55(19) . . ?
C38 C37 C36 120.6(2) . . ?
C38 C37 H37 119.7 . . ?
C36 C37 H37 119.7 . . ?
C39 C38 C37 119.9(3) . . ?
C39 C38 H38 120.0 . . ?
C37 C38 H38 120.0 . . ?
C38 C39 C40 120.1(2) . . ?
C38 C39 H39 119.9 . . ?
C40 C39 H39 119.9 . . ?
C39 C40 C41 120.1(3) . . ?
C39 C40 H40 119.9 . . ?
C41 C40 H40 119.9 . . ?
C40 C41 C36 120.5(3) . . ?
C40 C41 H41 119.7 . . ?
C36 C41 H41 119.7 . . ?
C47 C42 C43 119.2(2) . . ?
C47 C42 P2 120.40(19) . . ?
C43 C42 P2 120.3(2) . . ?
C44 C43 C42 120.2(3) . . ?
C44 C43 H43 119.9 . . ?
C42 C43 H43 119.9 . . ?
C45 C44 C43 120.3(2) . . ?
C45 C44 H44 119.9 . . ?
C43 C44 H44 119.9 . . ?
C46 C45 C44 119.8(2) . . ?
C46 C45 H45 120.1 . . ?
C44 C45 H45 120.1 . . ?
C45 C46 C47 120.1(3) . . ?
C45 C46 H46 120.0 . . ?
C47 C46 H46 120.0 . . ?
C46 C47 C42 120.4(2) . . ?
C46 C47 H47 119.8 . . ?
C42 C47 H47 119.8 . . ?
C54 O C51 105.7(3) . . ?
O C51 C52 107.3(3) . . ?
O C51 H51A 110.2 . . ?
C52 C51 H51A 110.2 . . ?
O C51 H51B 110.2 . . ?
C52 C51 H51B 110.2 . . ?
H51A C51 H51B 108.5 . . ?
C51 C52 C53 104.7(3) . . ?
C51 C52 H52A 110.8 . . ?
C53 C52 H52A 110.8 . . ?
C51 C52 H52B 110.8 . . ?
C53 C52 H52B 110.8 . . ?
H52A C52 H52B 108.9 . . ?
C54 C53 C52 104.1(3) . . ?
C54 C53 H53A 110.9 . . ?
C52 C53 H53A 110.9 . . ?
C54 C53 H53B 110.9 . . ?
C52 C53 H53B 110.9 . . ?
H53A C53 H53B 109.0 . . ?
O C54 C53 107.2(3) . . ?
O C54 H54A 110.3 . . ?
C53 C54 H54A 110.3 . . ?
O C54 H54B 110.3 . . ?
C53 C54 H54B 110.3 . . ?
H54A C54 H54B 108.5 . . ?

loop_
_geom_torsion_atom_site_label_1
_geom_torsion_atom_site_label_2
_geom_torsion_atom_site_label_3
_geom_torsion_atom_site_label_4
_geom_torsion
_geom_torsion_site_symmetry_1
_geom_torsion_site_symmetry_2
_geom_torsion_site_symmetry_3
_geom_torsion_site_symmetry_4
_geom_torsion_publ_flag
N1 Pd P1 C24 140.60(10) . . . . ?
P2 Pd P1 C24 10.3(2) . . . . ?
Cl Pd P1 C24 -47.80(9) . . . . ?
N1 Pd P1 C30 -93.47(10) . . . . ?
P2 Pd P1 C30 136.27(19) . . . . ?
Cl Pd P1 C30 78.13(8) . . . . ?
N1 Pd P1 C14 21.95(9) . . . . ?
P2 Pd P1 C14 -108.31(19) . . . . ?
Cl Pd P1 C14 -166.45(8) . . . . ?
N1 Pd P2 C42 97.95(9) . . . . ?
P1 Pd P2 C42 -131.82(19) . . . . ?
Cl Pd P2 C42 -73.71(8) . . . . ?
N1 Pd P2 C36 -137.02(11) . . . . ?
P1 Pd P2 C36 -6.8(2) . . . . ?
Cl Pd P2 C36 51.32(10) . . . . ?
N1 Pd P2 C15 -16.70(9) . . . . ?
P1 Pd P2 C15 113.53(19) . . . . ?
Cl Pd P2 C15 171.64(8) . . . . ?
P1 Pd N1 C13 25.10(15) . . . . ?
P2 Pd N1 C13 -159.95(15) . . . . ?
Cl Pd N1 C13 -63.1(5) . . . . ?
P1 Pd N1 C2 156.57(16) . . . . ?
P2 Pd N1 C2 -28.47(16) . . . . ?
Cl Pd N1 C2 68.4(5) . . . . ?
C13 N1 C2 C3 -175.6(2) . . . . ?
Pd N1 C2 C3 46.1(3) . . . . ?
C13 N1 C2 C7 1.4(2) . . . . ?
Pd N1 C2 C7 -136.92(16) . . . . ?
N1 C2 C3 C4 -177.3(2) . . . . ?
C7 C2 C3 C4 5.9(3) . . . . ?
N1 C2 C3 C15 3.7(4) . . . . ?
C7 C2 C3 C15 -173.1(2) . . . . ?
C2 C3 C4 C5 -2.9(3) . . . . ?
C15 C3 C4 C5 176.1(2) . . . . ?
C3 C4 C5 C6 -1.8(3) . . . . ?
C3 C4 C5 C16 176.2(2) . . . . ?
C4 C5 C6 C7 3.3(3) . . . . ?
C16 C5 C6 C7 -174.6(2) . . . . ?
C5 C6 C7 C2 -0.2(3) . . . . ?
C5 C6 C7 C8 178.5(2) . . . . ?
C3 C2 C7 C6 -4.5(3) . . . . ?
N1 C2 C7 C6 178.2(2) . . . . ?
C3 C2 C7 C8 176.48(19) . . . . ?
N1 C2 C7 C8 -0.8(2) . . . . ?
C6 C7 C8 C9 1.1(4) . . . . ?
C2 C7 C8 C9 180.0(2) . . . . ?
C6 C7 C8 C13 -178.9(2) . . . . ?
C2 C7 C8 C13 -0.1(2) . . . . ?
C13 C8 C9 C10 -1.7(3) . . . . ?
C7 C8 C9 C10 178.2(2) . . . . ?
C8 C9 C10 C11 -0.8(3) . . . . ?
C8 C9 C10 C20 179.2(2) . . . . ?
C9 C10 C11 C12 1.2(3) . . . . ?
C20 C10 C11 C12 -178.8(2) . . . . ?
C10 C11 C12 C13 1.0(3) . . . . ?
C10 C11 C12 C14 -178.0(2) . . . . ?
C2 N1 C13 C12 175.2(2) . . . . ?
Pd N1 C13 C12 -46.7(3) . . . . ?
C2 N1 C13 C8 -1.4(2) . . . . ?
Pd N1 C13 C8 136.71(16) . . . . ?
C11 C12 C13 N1 -179.9(2) . . . . ?
C14 C12 C13 N1 -0.9(3) . . . . ?
C11 C12 C13 C8 -3.5(3) . . . . ?
C14 C12 C13 C8 175.6(2) . . . . ?
C9 C8 C13 N1 -179.09(19) . . . . ?
C7 C8 C13 N1 1.0(2) . . . . ?
C9 C8 C13 C12 3.9(3) . . . . ?
C7 C8 C13 C12 -176.03(19) . . . . ?
C11 C12 C14 P1 -122.5(2) . . . . ?
C13 C12 C14 P1 58.5(2) . . . . ?
C24 P1 C14 C12 171.66(17) . . . . ?
C30 P1 C14 C12 62.22(18) . . . . ?
Pd P1 C14 C12 -61.51(17) . . . . ?
C4 C3 C15 P2 122.4(2) . . . . ?
C2 C3 C15 P2 -58.6(2) . . . . ?
C42 P2 C15 C3 -64.62(18) . . . . ?
C36 P2 C15 C3 -173.24(16) . . . . ?
Pd P2 C15 C3 56.76(17) . . . . ?
C6 C5 C16 C18 -129.5(2) . . . . ?
C4 C5 C16 C18 52.6(3) . . . . ?
C6 C5 C16 C19 -9.2(3) . . . . ?
C4 C5 C16 C19 172.9(2) . . . . ?
C6 C5 C16 C17 110.5(3) . . . . ?
C4 C5 C16 C17 -67.4(3) . . . . ?
C9 C10 C20 C21 -119.8(2) . . . . ?
C11 C10 C20 C21 60.2(3) . . . . ?
C9 C10 C20 C22 -0.3(3) . . . . ?
C11 C10 C20 C22 179.7(2) . . . . ?
C9 C10 C20 C23 120.2(2) . . . . ?
C11 C10 C20 C23 -59.8(3) . . . . ?
C30 P1 C24 C29 134.6(2) . . . . ?
C14 P1 C24 C29 26.7(3) . . . . ?
Pd P1 C24 C29 -94.1(2) . . . . ?
C30 P1 C24 C25 -44.8(3) . . . . ?
C14 P1 C24 C25 -152.7(2) . . . . ?
Pd P1 C24 C25 86.4(2) . . . . ?
C29 C24 C25 C26 -0.7(4) . . . . ?
P1 C24 C25 C26 178.7(2) . . . . ?
C24 C25 C26 C27 0.9(5) . . . . ?
C25 C26 C27 C28 -0.5(5) . . . . ?
C26 C27 C28 C29 0.0(5) . . . . ?
C25 C24 C29 C28 0.2(4) . . . . ?
P1 C24 C29 C28 -179.2(2) . . . . ?
C27 C28 C29 C24 0.1(5) . . . . ?
C24 P1 C30 C35 132.9(2) . . . . ?
C14 P1 C30 C35 -118.0(2) . . . . ?
Pd P1 C30 C35 0.6(2) . . . . ?
C24 P1 C30 C31 -52.0(2) . . . . ?
C14 P1 C30 C31 57.1(2) . . . . ?
Pd P1 C30 C31 175.73(16) . . . . ?
C35 C30 C31 C32 0.5(4) . . . . ?
P1 C30 C31 C32 -174.7(2) . . . . ?
C30 C31 C32 C33 0.3(4) . . . . ?
C31 C32 C33 C34 -0.8(4) . . . . ?
C32 C33 C34 C35 0.5(4) . . . . ?
C31 C30 C35 C34 -0.7(4) . . . . ?
P1 C30 C35 C34 174.37(19) . . . . ?
C33 C34 C35 C30 0.2(4) . . . . ?
C42 P2 C36 C37 -125.7(2) . . . . ?
C15 P2 C36 C37 -17.7(2) . . . . ?
Pd P2 C36 C37 104.9(2) . . . . ?
C42 P2 C36 C41 52.4(2) . . . . ?
C15 P2 C36 C41 160.3(2) . . . . ?
Pd P2 C36 C41 -77.0(2) . . . . ?
C41 C36 C37 C38 -1.7(4) . . . . ?
P2 C36 C37 C38 176.4(2) . . . . ?
C36 C37 C38 C39 1.1(4) . . . . ?
C37 C38 C39 C40 0.1(4) . . . . ?
C38 C39 C40 C41 -0.6(4) . . . . ?
C39 C40 C41 C36 0.0(4) . . . . ?
C37 C36 C41 C40 1.2(4) . . . . ?
P2 C36 C41 C40 -177.0(2) . . . . ?
C36 P2 C42 C47 50.4(2) . . . . ?
C15 P2 C42 C47 -58.2(2) . . . . ?
Pd P2 C42 C47 -176.19(16) . . . . ?
C36 P2 C42 C43 -133.9(2) . . . . ?
C15 P2 C42 C43 117.5(2) . . . . ?
Pd P2 C42 C43 -0.5(2) . . . . ?
C47 C42 C43 C44 0.8(4) . . . . ?
P2 C42 C43 C44 -174.99(19) . . . . ?
C42 C43 C44 C45 0.4(4) . . . . ?
C43 C44 C45 C46 -0.8(4) . . . . ?
C44 C45 C46 C47 0.0(4) . . . . ?
C45 C46 C47 C42 1.2(4) . . . . ?
C43 C42 C47 C46 -1.6(4) . . . . ?
P2 C42 C47 C46 174.20(19) . . . . ?
C54 O C51 C52 32.8(4) . . . . ?
O C51 C52 C53 -20.1(5) . . . . ?
C51 C52 C53 C54 0.5(5) . . . . ?
C51 O C54 C53 -32.4(4) . . . . ?
C52 C53 C54 O 19.2(5) . . . . ?

_diffrn_measured_fraction_theta_max 0.976
_diffrn_reflns_theta_full        66.97
_diffrn_measured_fraction_theta_full 0.985
_refine_diff_density_max         0.698
_refine_diff_density_min         -0.680
_refine_diff_density_rms         0.070
_audit_creation_date
;
'Tue Jun 19 11:36:04 2012'
;
_cell_oxdiff_length_a            12.7237(4)
_cell_oxdiff_length_b            13.9205(5)
_cell_oxdiff_length_c            14.7922(4)
_cell_oxdiff_angle_alpha         63.244(3)
_cell_oxdiff_angle_beta          75.697(3)
_cell_oxdiff_angle_gamma         68.328(3)
_cell_oxdiff_volume              2163.78(12)
_cell_oxdiff_measurement_reflns_used 18751
loop_
_exptl_crystal_face_index_h
_exptl_crystal_face_index_k
_exptl_crystal_face_index_l
_exptl_crystal_face_perp_dist
_exptl_oxdiff_crystal_face_indexfrac_h
_exptl_oxdiff_crystal_face_indexfrac_k
_exptl_oxdiff_crystal_face_indexfrac_l
_exptl_oxdiff_crystal_face_x
_exptl_oxdiff_crystal_face_y
_exptl_oxdiff_crystal_face_z
8 3 1 0.0281 8.0000 3.0000 1.0000 -0.1123 -0.2595 -0.9374
-1 -9 -6 0.0800 -1.0000 -9.0000 -6.0000 -0.2093 -0.9711 0.3553
1 8 6 0.0617 1.0000 8.0000 6.0000 0.2632 0.8566 -0.3258
-8 -5 -3 0.0410 -8.0000 -5.0000 -3.0000 -0.0142 0.0250 0.9909
1 1 9 0.0124 1.0000 1.0000 9.0000 0.9918 0.0643 -0.1117
-1 -1 -9 0.0124 -1.0000 -1.0000 -9.0000 -0.9918 -0.0643 0.1117
-8 -3 -1 0.0351 -8.0000 -3.0000 -1.0000 0.1123 0.2595 0.9374
_diffrn_orient_matrix_UB_11      -0.0084695000
_diffrn_orient_matrix_UB_12      -0.0538873000
_diffrn_orient_matrix_UB_13      0.1171261000
_diffrn_orient_matrix_UB_21      -0.0757007000
_diffrn_orient_matrix_UB_22      0.1144118000
_diffrn_orient_matrix_UB_23      0.0028415000
_diffrn_orient_matrix_UB_31      -0.1064664000
_diffrn_orient_matrix_UB_32      -0.0294419000
_diffrn_orient_matrix_UB_33      0.0026928000
_diffrn_measurement_details
;
#__ type_ start__ end____ width___ exp.time_
  1 omega  -20.00    7.00   1.0000    2.0000
omega____ theta____ kappa____ phi______ frames
    -        0.0000   38.0000   60.0000 27

#__ type_ start__ end____ width___ exp.time_
  2 omega  -19.00   64.00   1.0000    2.0000
omega____ theta____ kappa____ phi______ frames
    -        0.0000   57.0000  -90.0000 83

#__ type_ start__ end____ width___ exp.time_
  3 omega  -67.00  -42.00   1.0000    2.0000
omega____ theta____ kappa____ phi______ frames
    -        0.0000  -57.0000    0.0000 25

#__ type_ start__ end____ width___ exp.time_
  4 omega   24.00   61.00   1.0000    2.0000
omega____ theta____ kappa____ phi______ frames
    -        0.0000   38.0000   60.0000 37

#__ type_ start__ end____ width___ exp.time_
  5 omega  -88.00  -40.00   1.0000    7.0000
omega____ theta____ kappa____ phi______ frames
    -      -26.0000  -76.0000  -62.0000 48

#__ type_ start__ end____ width___ exp.time_
  6 omega  -24.00    1.00   1.0000    7.0000
omega____ theta____ kappa____ phi______ frames
    -      -26.0000  -76.0000  -62.0000 25

#__ type_ start__ end____ width___ exp.time_
  7 omega  -24.00    2.00   1.0000    7.0000
omega____ theta____ kappa____ phi______ frames
    -      -30.0000  -80.0000   75.0000 26

#__ type_ start__ end____ width___ exp.time_
  8 omega  -39.00  -12.00   1.0000    7.0000
omega____ theta____ kappa____ phi______ frames
    -      -42.5000  -77.0000   60.0000 27

#__ type_ start__ end____ width___ exp.time_
  9 omega  -40.00  -13.00   1.0000    7.0000
omega____ theta____ kappa____ phi______ frames
    -      -42.5000  -77.0000   30.0000 27

#__ type_ start__ end____ width___ exp.time_
 10 omega  -47.00  -12.00   1.0000    7.0000
omega____ theta____ kappa____ phi______ frames
    -      -42.5000  -77.0000 -150.0000 35

#__ type_ start__ end____ width___ exp.time_
 11 omega  -45.00   29.00   1.0000    7.0000
omega____ theta____ kappa____ phi______ frames
    -      -42.5000   38.0000 -120.0000 74

#__ type_ start__ end____ width___ exp.time_
 12 omega  -49.00   27.00   1.0000    7.0000
omega____ theta____ kappa____ phi______ frames
    -      -42.5000   25.0000   30.0000 76

#__ type_ start__ end____ width___ exp.time_
 13 omega  -42.00  -15.00   1.0000    7.0000
omega____ theta____ kappa____ phi______ frames
    -      -42.5000  -77.0000  120.0000 27

#__ type_ start__ end____ width___ exp.time_
 14 omega  -44.00  -17.00   1.0000    7.0000
omega____ theta____ kappa____ phi______ frames
    -      -42.5000  -77.0000   90.0000 27

#__ type_ start__ end____ width___ exp.time_
 15 omega  -48.00  -13.00   1.0000    7.0000
omega____ theta____ kappa____ phi______ frames
    -      -42.5000  -77.0000  -60.0000 35

#__ type_ start__ end____ width___ exp.time_
 16 omega -111.00  -82.00   1.0000    7.0000
omega____ theta____ kappa____ phi______ frames
    -      -42.5000  -57.0000 -180.0000 29

#__ type_ start__ end____ width___ exp.time_
 17 omega  -46.00   25.00   1.0000    7.0000
omega____ theta____ kappa____ phi______ frames
    -      -42.5000   63.0000  120.0000 71

#__ type_ start__ end____ width___ exp.time_
 18 omega  -40.00  -13.00   1.0000    7.0000
omega____ theta____ kappa____ phi______ frames
    -      -42.5000  -77.0000 -120.0000 27

#__ type_ start__ end____ width___ exp.time_
 19 omega   14.00   39.00   1.0000    7.0000
omega____ theta____ kappa____ phi______ frames
    -       46.0000   80.0000   68.0000 25

#__ type_ start__ end____ width___ exp.time_
 20 omega   15.00   41.00   1.0000    7.0000
omega____ theta____ kappa____ phi______ frames
    -       46.0000   78.0000  -18.0000 26

#__ type_ start__ end____ width___ exp.time_
 21 omega   18.00   43.00   1.0000    7.0000
omega____ theta____ kappa____ phi______ frames
    -       50.0000   80.0000 -112.0000 25

#__ type_ start__ end____ width___ exp.time_
 22 omega   19.00   44.00   1.0000    7.0000
omega____ theta____ kappa____ phi______ frames
    -       50.0000   79.0000   -6.0000 25

#__ type_ start__ end____ width___ exp.time_
 23 omega   19.00   44.00   1.0000    7.0000
omega____ theta____ kappa____ phi______ frames
    -       50.0000   79.0000 -175.0000 25

#__ type_ start__ end____ width___ exp.time_
 24 omega   18.00   43.00   1.0000    7.0000
omega____ theta____ kappa____ phi______ frames
    -       50.0000   80.0000  133.0000 25

#__ type_ start__ end____ width___ exp.time_
 25 omega   19.00   44.00   1.0000    7.0000
omega____ theta____ kappa____ phi______ frames
    -       50.0000   79.0000 -146.0000 25

#__ type_ start__ end____ width___ exp.time_
 26 omega   59.00   86.00   1.0000    7.0000
omega____ theta____ kappa____ phi______ frames
    -       50.0000   77.0000   28.0000 27

#__ type_ start__ end____ width___ exp.time_
 27 omega   21.00   50.00   1.0000    7.0000
omega____ theta____ kappa____ phi______ frames
    -       50.0000   77.0000   28.0000 29

#__ type_ start__ end____ width___ exp.time_
 28 omega   55.00  107.00   1.0000    7.0000
omega____ theta____ kappa____ phi______ frames
    -       54.0000   77.0000  103.0000 52

#__ type_ start__ end____ width___ exp.time_
 29 omega   23.00   48.00   1.0000    7.0000
omega____ theta____ kappa____ phi______ frames
    -       54.0000   78.0000  -18.0000 25

#__ type_ start__ end____ width___ exp.time_
 30 omega   23.00   48.00   1.0000    7.0000
omega____ theta____ kappa____ phi______ frames
    -       54.0000   78.0000   80.0000 25

#__ type_ start__ end____ width___ exp.time_
 31 omega   71.00  123.00   1.0000    7.0000
omega____ theta____ kappa____ phi______ frames
    -       54.0000   76.0000 -127.0000 52

#__ type_ start__ end____ width___ exp.time_
 32 omega   27.00   60.00   1.0000    7.0000
omega____ theta____ kappa____ phi______ frames
    -       54.0000   76.0000 -127.0000 33

#__ type_ start__ end____ width___ exp.time_
 33 omega   23.00   48.00   1.0000    7.0000
omega____ theta____ kappa____ phi______ frames
    -       54.0000   78.0000  165.0000 25

#__ type_ start__ end____ width___ exp.time_
 34 omega   26.00   60.00   1.0000    7.0000
omega____ theta____ kappa____ phi______ frames
    -       54.0000   75.0000  -75.0000 34

#__ type_ start__ end____ width___ exp.time_
 35 omega   23.00   48.00   1.0000    7.0000
omega____ theta____ kappa____ phi______ frames
    -       54.0000   78.0000  100.0000 25

#__ type_ start__ end____ width___ exp.time_
 36 omega    7.00   83.00   1.0000    7.0000
omega____ theta____ kappa____ phi______ frames
    -       55.1171  -77.0000   30.0000 76

#__ type_ start__ end____ width___ exp.time_
 37 omega   26.00   55.00   1.0000    7.0000
omega____ theta____ kappa____ phi______ frames
    -       55.1171   77.0000  -60.0000 29

#__ type_ start__ end____ width___ exp.time_
 38 omega   58.00  103.00   1.0000    7.0000
omega____ theta____ kappa____ phi______ frames
    -       55.1171   77.0000  -60.0000 45

#__ type_ start__ end____ width___ exp.time_
 39 omega   -1.00   84.00   1.0000    7.0000
omega____ theta____ kappa____ phi______ frames
    -       55.1171  -77.0000  -60.0000 85

#__ type_ start__ end____ width___ exp.time_
 40 omega   30.00  112.00   1.0000    7.0000
omega____ theta____ kappa____ phi______ frames
    -       58.0000   76.0000  -35.0000 82

#__ type_ start__ end____ width___ exp.time_
 41 omega   29.00  128.00   1.0000    7.0000
omega____ theta____ kappa____ phi______ frames
    -       58.0000   76.0000   54.0000 99

#__ type_ start__ end____ width___ exp.time_
 42 omega   34.00  128.00   1.0000    7.0000
omega____ theta____ kappa____ phi______ frames
    -       58.0000   74.0000   91.0000 94

#__ type_ start__ end____ width___ exp.time_
 43 omega   30.00  127.00   1.0000    7.0000
omega____ theta____ kappa____ phi______ frames
    -       58.0000   73.0000 -159.0000 97

#__ type_ start__ end____ width___ exp.time_
 44 omega   51.00   78.00   1.0000    7.0000
omega____ theta____ kappa____ phi______ frames
    -       70.0000  -80.0000 -104.0000 27

#__ type_ start__ end____ width___ exp.time_
 45 omega    4.00  105.00   1.0000    7.0000
omega____ theta____ kappa____ phi______ frames
    -       74.0000  -80.0000  159.0000 101

#__ type_ start__ end____ width___ exp.time_
 46 omega   54.00   81.00   1.0000   14.0000
omega____ theta____ kappa____ phi______ frames
    -       90.0000  -79.0000 -118.0000 27

#__ type_ start__ end____ width___ exp.time_
 47 omega  115.00  142.00   1.0000   14.0000
omega____ theta____ kappa____ phi______ frames
    -      110.2342  -80.0000  138.0000 27

#__ type_ start__ end____ width___ exp.time_
 48 omega   70.00  110.00   1.0000   14.0000
omega____ theta____ kappa____ phi______ frames
    -      110.2342  -80.0000  138.0000 40

#__ type_ start__ end____ width___ exp.time_
 49 omega   40.00  142.00   1.0000   14.0000
omega____ theta____ kappa____ phi______ frames
    -      110.2342  -80.0000 -143.0000 102

#__ type_ start__ end____ width___ exp.time_
 50 omega   40.00   66.00   1.0000   14.0000
omega____ theta____ kappa____ phi______ frames
    -      110.2342  -77.0000 -180.0000 26

#__ type_ start__ end____ width___ exp.time_
 51 omega  146.00  172.00   1.0000   14.0000
omega____ theta____ kappa____ phi______ frames
    -      110.2342   77.0000  -60.0000 26

#__ type_ start__ end____ width___ exp.time_
 52 omega   40.00  141.00   1.0000   14.0000
omega____ theta____ kappa____ phi______ frames
    -      110.2342  -80.0000   35.0000 101

#__ type_ start__ end____ width___ exp.time_
 53 omega   80.00  107.00   1.0000   14.0000
omega____ theta____ kappa____ phi______ frames
    -      110.2342   77.0000  -60.0000 27

#__ type_ start__ end____ width___ exp.time_
 54 omega   86.00  111.00   1.0000   14.0000
omega____ theta____ kappa____ phi______ frames
    -      110.2342   38.0000  120.0000 25

#__ type_ start__ end____ width___ exp.time_
 55 omega   91.00  118.00   1.0000   14.0000
omega____ theta____ kappa____ phi______ frames
    -      110.2342  -77.0000 -180.0000 27

#__ type_ start__ end____ width___ exp.time_
 56 omega   89.00  177.00   1.0000   14.0000
omega____ theta____ kappa____ phi______ frames
    -      110.2342   50.0000   60.0000 88

#__ type_ start__ end____ width___ exp.time_
 57 omega   91.00  157.00   1.0000   14.0000
omega____ theta____ kappa____ phi______ frames
    -      110.2342   50.0000  150.0000 66

#__ type_ start__ end____ width___ exp.time_
 58 omega   80.00  106.00   1.0000   14.0000
omega____ theta____ kappa____ phi______ frames
    -      110.2342   77.0000  -90.0000 26

#__ type_ start__ end____ width___ exp.time_
 59 omega  141.00  168.00   1.0000   14.0000
omega____ theta____ kappa____ phi______ frames
    -      110.2342   77.0000 -180.0000 27

#__ type_ start__ end____ width___ exp.time_
 60 omega   85.00  120.00   1.0000   14.0000
omega____ theta____ kappa____ phi______ frames
    -      110.2342   38.0000   30.0000 35

#__ type_ start__ end____ width___ exp.time_
 61 omega   81.00  106.00   1.0000   14.0000
omega____ theta____ kappa____ phi______ frames
    -      110.2342   77.0000   60.0000 25

#__ type_ start__ end____ width___ exp.time_
 62 omega  153.00  178.00   1.0000   14.0000
omega____ theta____ kappa____ phi______ frames
    -      110.2342   77.0000   60.0000 25

#__ type_ start__ end____ width___ exp.time_
 63 omega   81.00  106.00   1.0000   14.0000
omega____ theta____ kappa____ phi______ frames
    -      110.2342   77.0000 -180.0000 25

#__ type_ start__ end____ width___ exp.time_
 64 omega  148.00  175.00   1.0000   14.0000
omega____ theta____ kappa____ phi______ frames
    -      110.2342   77.0000   90.0000 27

#__ type_ start__ end____ width___ exp.time_
 65 omega   80.00  106.00   1.0000   14.0000
omega____ theta____ kappa____ phi______ frames
    -      110.2342   77.0000   90.0000 26

#__ type_ start__ end____ width___ exp.time_
 66 omega   40.00  116.00   1.0000   14.0000
omega____ theta____ kappa____ phi______ frames
    -      110.2342  -80.0000  -78.0000 76

#__ type_ start__ end____ width___ exp.time_
 67 omega   88.00  115.00   1.0000   14.0000
omega____ theta____ kappa____ phi______ frames
    -      110.2342   63.0000 -120.0000 27

#__ type_ start__ end____ width___ exp.time_
 68 omega   81.00  106.00   1.0000   14.0000
omega____ theta____ kappa____ phi______ frames
    -      110.2342   77.0000    0.0000 25

#__ type_ start__ end____ width___ exp.time_
 69 omega   91.00  177.00   1.0000   14.0000
omega____ theta____ kappa____ phi______ frames
    -      110.2342   63.0000 -150.0000 86

#__ type_ start__ end____ width___ exp.time_
 70 omega  123.00  171.00   1.0000   14.0000
omega____ theta____ kappa____ phi______ frames
    -      110.2342   77.0000 -120.0000 48

#__ type_ start__ end____ width___ exp.time_
 71 omega  117.00  142.00   1.0000   14.0000
omega____ theta____ kappa____ phi______ frames
    -      110.2342  -80.0000   96.0000 25

#__ type_ start__ end____ width___ exp.time_
 72 omega   80.00  106.00   1.0000   14.0000
omega____ theta____ kappa____ phi______ frames
    -      110.2342   77.0000 -120.0000 26

#__ type_ start__ end____ width___ exp.time_
 73 omega   92.00  177.00   1.0000   14.0000
omega____ theta____ kappa____ phi______ frames
    -      110.2342   50.0000  -60.0000 85

#__ type_ start__ end____ width___ exp.time_
 74 omega   44.00   99.00   1.0000   14.0000
omega____ theta____ kappa____ phi______ frames
    -      110.2342  -80.0000   96.0000 55

#__ type_ start__ end____ width___ exp.time_
 75 omega  144.00  171.00   1.0000   14.0000
omega____ theta____ kappa____ phi______ frames
    -      110.2342   77.0000  -30.0000 27

#__ type_ start__ end____ width___ exp.time_
 76 omega   80.00  106.00   1.0000   14.0000
omega____ theta____ kappa____ phi______ frames
    -      110.2342   77.0000   30.0000 26

#__ type_ start__ end____ width___ exp.time_
 77 omega   80.00  106.00   1.0000   14.0000
omega____ theta____ kappa____ phi______ frames
    -      110.2342   77.0000  -30.0000 26

#__ type_ start__ end____ width___ exp.time_
 78 omega   91.00  118.00   1.0000   14.0000
omega____ theta____ kappa____ phi______ frames
    -      110.2342   50.0000  120.0000 27

#__ type_ start__ end____ width___ exp.time_
 79 omega   92.00  145.00   1.0000   14.0000
omega____ theta____ kappa____ phi______ frames
    -      110.2342   50.0000    0.0000 53

#__ type_ start__ end____ width___ exp.time_
 80 omega  132.00  172.00   1.0000   14.0000
omega____ theta____ kappa____ phi______ frames
    -      110.2342   63.0000  120.0000 40

#__ type_ start__ end____ width___ exp.time_
 81 omega   90.00  117.00   1.0000   14.0000
omega____ theta____ kappa____ phi______ frames
    -      110.2342   50.0000   90.0000 27

#__ type_ start__ end____ width___ exp.time_
 82 omega   89.00  116.00   1.0000   14.0000
omega____ theta____ kappa____ phi______ frames
    -      110.2342   50.0000 -180.0000 27

#__ type_ start__ end____ width___ exp.time_
 83 omega   89.00  114.00   1.0000   14.0000
omega____ theta____ kappa____ phi______ frames
    -      110.2342   63.0000  120.0000 25

#__ type_ start__ end____ width___ exp.time_
 84 omega   88.00  177.00   1.0000   14.0000
omega____ theta____ kappa____ phi______ frames
    -      110.2342   50.0000   30.0000 89

#__ type_ start__ end____ width___ exp.time_
 85 omega   88.00  117.00   1.0000   14.0000
omega____ theta____ kappa____ phi______ frames
    -      110.2342   50.0000 -120.0000 29

#__ type_ start__ end____ width___ exp.time_
 86 omega   86.00  115.00   1.0000   14.0000
omega____ theta____ kappa____ phi______ frames
    -      110.2342   38.0000   60.0000 29

#__ type_ start__ end____ width___ exp.time_
 87 omega  117.00  149.00   1.0000   14.0000
omega____ theta____ kappa____ phi______ frames
    -      110.2342   50.0000 -150.0000 32

#__ type_ start__ end____ width___ exp.time_
 88 omega  150.00  177.00   1.0000   14.0000
omega____ theta____ kappa____ phi______ frames
    -      110.2342   63.0000   30.0000 27

#__ type_ start__ end____ width___ exp.time_
 89 omega   89.00  114.00   1.0000   14.0000
omega____ theta____ kappa____ phi______ frames
    -      110.2342   63.0000  -30.0000 25

#__ type_ start__ end____ width___ exp.time_
 90 omega   92.00  119.00   1.0000   14.0000
omega____ theta____ kappa____ phi______ frames
    -      110.2342   50.0000  -90.0000 27

#__ type_ start__ end____ width___ exp.time_
 91 omega   39.00   88.00   1.0000   14.0000
omega____ theta____ kappa____ phi______ frames
    -      110.2342  -80.0000   87.0000 49

#__ type_ start__ end____ width___ exp.time_
 92 omega   94.00  121.00   1.0000   14.0000
omega____ theta____ kappa____ phi______ frames
    -      110.2342   50.0000  -30.0000 27

#__ type_ start__ end____ width___ exp.time_
 93 omega   89.00  116.00   1.0000   14.0000
omega____ theta____ kappa____ phi______ frames
    -      110.2342   50.0000 -150.0000 27

#__ type_ start__ end____ width___ exp.time_
 94 omega   89.00  116.00   1.0000   14.0000
omega____ theta____ kappa____ phi______ frames
    -      110.2342   63.0000   30.0000 27

#__ type_ start__ end____ width___ exp.time_
 95 omega   85.00  111.00   1.0000   14.0000
omega____ theta____ kappa____ phi______ frames
    -      110.2342   38.0000  150.0000 26

#__ type_ start__ end____ width___ exp.time_
 96 omega   81.00  106.00   1.0000   14.0000
omega____ theta____ kappa____ phi______ frames
    -      110.2342   77.0000 -150.0000 25

#__ type_ start__ end____ width___ exp.time_
 97 omega   85.00  111.00   1.0000   14.0000
omega____ theta____ kappa____ phi______ frames
    -      110.2342   38.0000  -30.0000 26

#__ type_ start__ end____ width___ exp.time_
 98 omega   88.00  176.00   1.0000   14.0000
omega____ theta____ kappa____ phi______ frames
    -      110.2342   63.0000  -90.0000 88

#__ type_ start__ end____ width___ exp.time_
 99 omega   88.00  115.00   1.0000   14.0000
omega____ theta____ kappa____ phi______ frames
    -      110.2342   63.0000  -60.0000 27

#__ type_ start__ end____ width___ exp.time_
100 omega  152.00  177.00   1.0000   14.0000
omega____ theta____ kappa____ phi______ frames
    -      110.2342   63.0000  -60.0000 25

#__ type_ start__ end____ width___ exp.time_
101 omega   89.00  116.00   1.0000   14.0000
omega____ theta____ kappa____ phi______ frames
    -      110.2342   63.0000   60.0000 27

#__ type_ start__ end____ width___ exp.time_
102 omega   89.00  114.00   1.0000   14.0000
omega____ theta____ kappa____ phi______ frames
    -      110.2342   63.0000  150.0000 25

#__ type_ start__ end____ width___ exp.time_
103 omega   85.00  111.00   1.0000   14.0000
omega____ theta____ kappa____ phi______ frames
    -      110.2342   38.0000  -60.0000 26

#__ type_ start__ end____ width___ exp.time_
104 omega   85.00  178.00   1.0000   14.0000
omega____ theta____ kappa____ phi______ frames
    -      110.2342   38.0000   90.0000 93

#__ type_ start__ end____ width___ exp.time_
105 omega   85.00  115.00   1.0000   14.0000
omega____ theta____ kappa____ phi______ frames
    -      110.2342   38.0000 -120.0000 30

#__ type_ start__ end____ width___ exp.time_
106 omega   86.00  111.00   1.0000   14.0000
omega____ theta____ kappa____ phi______ frames
    -      110.2342   38.0000 -150.0000 25

#__ type_ start__ end____ width___ exp.time_
107 omega   89.00  176.00   1.0000   14.0000
omega____ theta____ kappa____ phi______ frames
    -      110.2342   63.0000    0.0000 87

#__ type_ start__ end____ width___ exp.time_
108 omega  149.00  176.00   1.0000   14.0000
omega____ theta____ kappa____ phi______ frames
    -      110.2342   38.0000 -180.0000 27

#__ type_ start__ end____ width___ exp.time_
109 omega   80.00  106.00   1.0000   14.0000
omega____ theta____ kappa____ phi______ frames
    -      110.2342   77.0000  120.0000 26

#__ type_ start__ end____ width___ exp.time_
110 omega   89.00  114.00   1.0000   14.0000
omega____ theta____ kappa____ phi______ frames
    -      110.2342   63.0000   90.0000 25

#__ type_ start__ end____ width___ exp.time_
111 omega   85.00  111.00   1.0000   14.0000
omega____ theta____ kappa____ phi______ frames
    -      110.2342   38.0000 -180.0000 26

#__ type_ start__ end____ width___ exp.time_
112 omega   85.00  154.00   1.0000   14.0000
omega____ theta____ kappa____ phi______ frames
    -      110.2342   38.0000    0.0000 69

#__ type_ start__ end____ width___ exp.time_
113 omega   85.00  157.00   1.0000   14.0000
omega____ theta____ kappa____ phi______ frames
    -      110.2342   38.0000  -90.0000 72

#__ type_ start__ end____ width___ exp.time_
114 omega   67.00   94.00   1.0000   14.0000
omega____ theta____ kappa____ phi______ frames
    -      110.2342  -78.0000  -17.0000 27

#__ type_ start__ end____ width___ exp.time_
115 omega   88.00  115.00   1.0000   14.0000
omega____ theta____ kappa____ phi______ frames
    -      110.2342   63.0000 -180.0000 27

#__ type_ start__ end____ width___ exp.time_
116 omega   41.00   66.00   1.0000   14.0000
omega____ theta____ kappa____ phi______ frames
    -      110.2342  -78.0000  -17.0000 25

#__ type_ start__ end____ width___ exp.time_
117 omega   81.00  174.00   1.0000   14.0000
omega____ theta____ kappa____ phi______ frames
    -      110.2342   77.0000  150.0000 93

#__ type_ start__ end____ width___ exp.time_
118 omega   77.00  108.00   1.0000   14.0000
omega____ theta____ kappa____ phi______ frames
    -      110.2342   25.0000  -90.0000 31

#__ type_ start__ end____ width___ exp.time_
119 omega   74.00   99.00   1.0000   14.0000
omega____ theta____ kappa____ phi______ frames
    -      110.2342  -79.0000   -4.0000 25

#__ type_ start__ end____ width___ exp.time_
120 omega  -26.00   72.00   1.0000    2.0000
omega____ theta____ kappa____ phi______ frames
    -        0.0000   38.0000 -180.0000 98

#__ type_ start__ end____ width___ exp.time_
121 omega  -73.00   44.00   1.0000    2.0000
omega____ theta____ kappa____ phi______ frames
    -        0.0000  -19.0000 -120.0000 117

#__ type_ start__ end____ width___ exp.time_
122 omega  -26.00   72.00   1.0000    2.0000
omega____ theta____ kappa____ phi______ frames
    -        0.0000   38.0000    0.0000 98

#__ type_ start__ end____ width___ exp.time_
123 omega  -63.00   26.00   1.0000    7.0000
omega____ theta____ kappa____ phi______ frames
    -      -42.5000   57.0000  -90.0000 89

#__ type_ start__ end____ width___ exp.time_
124 omega   20.00  120.00   1.0000    7.0000
omega____ theta____ kappa____ phi______ frames
    -       50.0000   77.0000  -97.0000 100

#__ type_ start__ end____ width___ exp.time_
125 omega   18.00   46.00   1.0000    7.0000
omega____ theta____ kappa____ phi______ frames
    -       50.0000   80.0000  115.0000 28

#__ type_ start__ end____ width___ exp.time_
126 omega   23.00   49.00   1.0000    7.0000
omega____ theta____ kappa____ phi______ frames
    -       54.0000   78.0000  165.0000 26

#__ type_ start__ end____ width___ exp.time_
127 omega  -15.00   85.00   1.0000    7.0000
omega____ theta____ kappa____ phi______ frames
    -       55.1171  -77.0000   60.0000 100

#__ type_ start__ end____ width___ exp.time_
128 omega  -13.00   90.00   1.0000    7.0000
omega____ theta____ kappa____ phi______ frames
    -       58.0000  -80.0000  148.0000 103

#__ type_ start__ end____ width___ exp.time_
129 omega   30.00  128.00   1.0000    7.0000
omega____ theta____ kappa____ phi______ frames
    -       58.0000   74.0000   91.0000 98

#__ type_ start__ end____ width___ exp.time_
130 omega   29.00  128.00   1.0000    7.0000
omega____ theta____ kappa____ phi______ frames
    -       58.0000   76.0000  -35.0000 99

#__ type_ start__ end____ width___ exp.time_
131 omega   30.00  127.00   1.0000    7.0000
omega____ theta____ kappa____ phi______ frames
    -       58.0000   73.0000 -159.0000 97

#__ type_ start__ end____ width___ exp.time_
132 omega   29.00  128.00   1.0000    7.0000
omega____ theta____ kappa____ phi______ frames
    -       58.0000   76.0000   54.0000 99

#__ type_ start__ end____ width___ exp.time_
133 omega   -1.00  102.00   1.0000    7.0000
omega____ theta____ kappa____ phi______ frames
    -       70.0000  -80.0000 -104.0000 103

;
_reflns_odcompleteness_completeness 98.49
_reflns_odcompleteness_theta     66.97
_reflns_odcompleteness_iscentric 1
_diffrn_measurement_device       '\k-geometry diffractometer'
_diffrn_detector                 'CCD plate'
_diffrn_detector_type            'Agilent EOS'
_diffrn_measurement_specimen_support 'polyimid foil'
_refine_ls_abs_structure_details 'Flack H D (1983), Acta Cryst. A39, 876-881'


#==end==


data_complex_9a

_audit_creation_method           SHELXL-97
_audit_block_code                ga_ng17
_audit_block_refno               1411
_audit_update_record             'Thu Jan 12 11:24:40 CET 2012'

_audit_block_usercomment         NG-197-3


_chemical_name_systematic        ?
_chemical_name_common            ?
_chemical_formula_moiety         ?
_chemical_formula_sum            'C49 H46 Cl10 D3 N Ni P2'
_exptl_crystal_recrystallization_method CDCl3
_chemical_melting_point          ?

_exptl_crystal_description       irregular
_exptl_crystal_colour            red

_diffrn_ambient_temperature      100(2)
_chemical_formula_weight         1130.06

loop_
_atom_type_symbol
_atom_type_description
_atom_type_scat_dispersion_real
_atom_type_scat_dispersion_imag
_atom_type_scat_source
C C 0.0033 0.0016 'International Tables Vol C Tables 4.2.6.8 and 6.1.1.4'
D D 0.0000 0.0000 'International Tables Vol C Tables 4.2.6.8 and 6.1.1.4'
Cl Cl 0.1484 0.1585 'International Tables Vol C Tables 4.2.6.8 and 6.1.1.4'
N N 0.0061 0.0033 'International Tables Vol C Tables 4.2.6.8 and 6.1.1.4'
Ni Ni 0.3393 1.1124 'International Tables Vol C Tables 4.2.6.8 and 6.1.1.4'
P P 0.1023 0.0942 'International Tables Vol C Tables 4.2.6.8 and 6.1.1.4'
H H 0.0000 0.0000 'International Tables Vol C Tables 4.2.6.8 and 6.1.1.4'

_symmetry_cell_setting           triclinic
_symmetry_space_group_name_H-M   'P -1'
_symmetry_int_tables_number      2

_chemical_absolute_configuration .

loop_
_symmetry_equiv_pos_as_xyz
'x, y, z'
'-x, -y, -z'

_cell_length_a                   12.8435(11)
_cell_length_b                   13.5446(11)
_cell_length_c                   15.6628(13)
_cell_angle_alpha                97.951(2)
_cell_angle_beta                 99.082(2)
_cell_angle_gamma                111.5740(10)
_cell_volume                     2444.2(4)
_cell_formula_units_Z            2
_cell_measurement_temperature    100(2)
_cell_measurement_reflns_used    8120
_cell_measurement_theta_min      2.28
_cell_measurement_theta_max      29.85
_exptl_crystal_size_max          0.16
_exptl_crystal_size_mid          0.11
_exptl_crystal_size_min          0.06
_exptl_crystal_density_meas      ?
_exptl_crystal_density_diffrn    1.535
_exptl_crystal_density_method    'not measured'
_exptl_crystal_F_000             1156
_exptl_absorpt_coefficient_mu    1.046

_exptl_absorpt_correction_type   multi-scan
_exptl_absorpt_correction_T_min  0.6810
_exptl_absorpt_correction_T_max  0.7464
_exptl_absorpt_process_details
;
multi-scan from symmetry-related measurements (Blessing 1995)
SADABS (Sheldrick & Bruker AXS, 2004-2008)
;

_exptl_special_details
;
 ?
;
_diffrn_radiation_probe          x-ray
_diffrn_radiation_type           MoK\a
_diffrn_radiation_wavelength     0.71073
_diffrn_source                   'fine-focus sealed tube (Mo)'
_diffrn_radiation_monochromator  graphite
_diffrn_measurement_device_type  'Bruker AXS Smart 1000'
_diffrn_measurement_method       '\f- and \w-scans'
_diffrn_detector_area_resol_mean 8.19
_diffrn_reflns_number            59758
_diffrn_reflns_av_R_equivalents  0.0627
_diffrn_reflns_av_sigmaI/netI    0.0639
_diffrn_reflns_limit_h_min       -18
_diffrn_reflns_limit_h_max       17
_diffrn_reflns_limit_k_min       -19
_diffrn_reflns_limit_k_max       19
_diffrn_reflns_limit_l_min       0
_diffrn_reflns_limit_l_max       22
_diffrn_reflns_theta_min         1.35
_diffrn_reflns_theta_max         30.51
_reflns_number_total             14904
_reflns_number_gt                10471
_reflns_threshold_expression     >2sigma(I)
_computing_data_collection       'SMART-5.631 (Bruker AXS, 2003)'

_computing_cell_refinement
;
SAINT (Bruker AXS, 1997-2008). Includes estimated systematic errors
 of the unit cell constants from Monte Carlo simulations.
;
_computing_data_reduction        'SAINT (Bruker AXS, 1997-2008)'
_computing_structure_solution    'SUPERFLIP (Palatinus, 2007-2009)'
_computing_structure_refinement  'SHELXL-97 (Sheldrick, 1997)'
_computing_molecular_graphics    ?
_computing_publication_material  'SHELXL-97 (Sheldrick, 1997)'

_refine_special_details
;
 Refinement of F^2^ against ALL reflections.  The weighted R-factor wR and
 goodness of fit S are based on F^2^, conventional R-factors R are based
 on F, with F set to zero for negative F^2^. The threshold expression of
 F^2^ > 2sigma(F^2^) is used only for calculating R-factors(gt) etc. and is
 not relevant to the choice of reflections for refinement.  R-factors based
 on F^2^ are statistically about twice as large as those based on F, and R-
 factors based on ALL data will be even larger.
 electron density attributed to disordered CDCl3 was removed
 from the structure (and the corresponding Fo) with the BYPASS
 procedure (PLATON/SQUEEZE, see _platon_squeeze_).

;

_refine_ls_structure_factor_coef Fsqd
_refine_ls_matrix_type           full
_refine_ls_weighting_scheme      calc
_refine_ls_weighting_details
'calc w=1/[\s^2^(Fo^2^)+(0.0704P)^2^+0.5560P] where P=(Fo^2^+2Fc^2^)/3'
_atom_sites_solution_primary     dual
_atom_sites_solution_secondary   difmap
_atom_sites_solution_hydrogens   geom

_refine_ls_hydrogen_treatment    constr
_refine_ls_extinction_method     none
_refine_ls_extinction_coef       ?
_refine_ls_number_reflns         14904
_refine_ls_number_parameters     502
_refine_ls_number_restraints     0
_refine_ls_R_factor_all          0.0773
_refine_ls_R_factor_gt           0.0518
_refine_ls_wR_factor_ref         0.1375
_refine_ls_wR_factor_gt          0.1268
_refine_ls_goodness_of_fit_ref   1.033
_refine_ls_restrained_S_all      1.033
_refine_ls_shift/su_max          0.001
_refine_ls_shift/su_mean         0.000

loop_
_atom_site_label
_atom_site_type_symbol
_atom_site_fract_x
_atom_site_fract_y
_atom_site_fract_z
_atom_site_U_iso_or_equiv
_atom_site_adp_type
_atom_site_occupancy
_atom_site_symmetry_multiplicity
_atom_site_calc_flag
_atom_site_refinement_flags
_atom_site_disorder_assembly
_atom_site_disorder_group
Ni Ni 0.48980(2) 0.36651(2) 0.224409(18) 0.01321(7) Uani 1 1 d . . .
Cl1 Cl 0.56922(5) 0.37503(4) 0.36083(3) 0.01772(11) Uani 1 1 d . . .
P2 P 0.62396(5) 0.52938(4) 0.22997(4) 0.01262(11) Uani 1 1 d . . .
P1 P 0.33466(5) 0.24147(4) 0.24583(4) 0.01252(11) Uani 1 1 d . . .
N1 N 0.44489(15) 0.32497(14) 0.09766(12) 0.0139(3) Uani 1 1 d . . .
C13 C 0.37936(18) 0.21560(17) 0.05552(14) 0.0133(4) Uani 1 1 d . . .
C12 C 0.28035(18) 0.14078(18) 0.07320(14) 0.0151(4) Uani 1 1 d . . .
C11 C 0.2339(2) 0.03553(18) 0.02351(15) 0.0174(4) Uani 1 1 d . . .
H11 H 0.1682 -0.0158 0.0368 0.021 Uiso 1 1 calc R . .
C10 C 0.2785(2) -0.00003(18) -0.04592(15) 0.0177(4) Uani 1 1 d . . .
C9 C 0.3719(2) 0.07625(18) -0.06626(15) 0.0177(4) Uani 1 1 d . . .
H9 H 0.4025 0.0561 -0.1139 0.021 Uiso 1 1 calc R . .
C8 C 0.42140(19) 0.18325(17) -0.01673(14) 0.0147(4) Uani 1 1 d . . .
C7 C 0.51621(18) 0.27837(17) -0.02296(14) 0.0139(4) Uani 1 1 d . . .
C6 C 0.58709(19) 0.29724(18) -0.08315(14) 0.0152(4) Uani 1 1 d . . .
H6 H 0.5786 0.2395 -0.1294 0.018 Uiso 1 1 calc R . .
C5 C 0.67003(19) 0.40063(19) -0.07518(15) 0.0166(4) Uani 1 1 d . . .
C4 C 0.67730(18) 0.48405(18) -0.00671(14) 0.0153(4) Uani 1 1 d . . .
H4 H 0.7335 0.5552 -0.0012 0.018 Uiso 1 1 calc R . .
C3 C 0.60651(18) 0.46753(18) 0.05309(14) 0.0140(4) Uani 1 1 d . . .
C2 C 0.52654(18) 0.36197(17) 0.04687(14) 0.0130(4) Uani 1 1 d . . .
C15 C 0.61291(18) 0.56079(17) 0.12048(14) 0.0138(4) Uani 1 1 d . . .
H15A H 0.5433 0.5758 0.1047 0.017 Uiso 1 1 calc R . .
H15B H 0.6807 0.6267 0.1208 0.017 Uiso 1 1 calc R . .
C14 C 0.22558(18) 0.17500(18) 0.14307(14) 0.0161(4) Uani 1 1 d . . .
H14A H 0.1631 0.1107 0.1522 0.019 Uiso 1 1 calc R . .
H14B H 0.1920 0.2257 0.1242 0.019 Uiso 1 1 calc R . .
C20 C 0.2225(2) -0.11925(19) -0.09514(16) 0.0229(5) Uani 1 1 d . . .
C23 C 0.2298(3) -0.1918(2) -0.0307(2) 0.0429(8) Uani 1 1 d . . .
H23A H 0.3106 -0.1741 -0.0044 0.064 Uiso 1 1 calc R . .
H23B H 0.1929 -0.2681 -0.0623 0.064 Uiso 1 1 calc R . .
H23C H 0.1905 -0.1801 0.0161 0.064 Uiso 1 1 calc R . .
C22 C 0.0982(3) -0.1477(3) -0.1385(3) 0.0608(12) Uani 1 1 d . . .
H22A H 0.0566 -0.1374 -0.0930 0.091 Uiso 1 1 calc R . .
H22B H 0.0630 -0.2237 -0.1706 0.091 Uiso 1 1 calc R . .
H22C H 0.0946 -0.1005 -0.1799 0.091 Uiso 1 1 calc R . .
C21 C 0.2842(5) -0.1428(3) -0.1670(3) 0.0770(16) Uani 1 1 d . . .
H21A H 0.2810 -0.0980 -0.2105 0.115 Uiso 1 1 calc R . .
H21B H 0.2462 -0.2198 -0.1965 0.115 Uiso 1 1 calc R . .
H21C H 0.3646 -0.1257 -0.1397 0.115 Uiso 1 1 calc R . .
C16 C 0.7530(2) 0.4255(2) -0.13745(15) 0.0198(5) Uani 1 1 d . . .
C19 C 0.7243(3) 0.3278(3) -0.2119(2) 0.0530(10) Uani 1 1 d . . .
H19A H 0.7182 0.2641 -0.1867 0.080 Uiso 1 1 calc R . .
H19B H 0.7852 0.3434 -0.2449 0.080 Uiso 1 1 calc R . .
H19C H 0.6510 0.3133 -0.2519 0.080 Uiso 1 1 calc R . .
C17 C 0.8737(3) 0.4540(4) -0.0837(2) 0.0535(10) Uani 1 1 d . . .
H17A H 0.8937 0.5156 -0.0344 0.080 Uiso 1 1 calc R . .
H17B H 0.9287 0.4736 -0.1217 0.080 Uiso 1 1 calc R . .
H17C H 0.8764 0.3912 -0.0605 0.080 Uiso 1 1 calc R . .
C18 C 0.7486(3) 0.5190(3) -0.1782(2) 0.0464(9) Uani 1 1 d . . .
H18A H 0.6698 0.5008 -0.2104 0.070 Uiso 1 1 calc R . .
H18B H 0.8001 0.5327 -0.2192 0.070 Uiso 1 1 calc R . .
H18C H 0.7731 0.5842 -0.1314 0.070 Uiso 1 1 calc R . .
C36 C 0.61213(18) 0.64276(18) 0.29910(15) 0.0163(4) Uani 1 1 d . . .
C37 C 0.6235(2) 0.73756(19) 0.26876(16) 0.0205(5) Uani 1 1 d . . .
H37 H 0.6368 0.7429 0.2113 0.025 Uiso 1 1 calc R . .
C38 C 0.6154(2) 0.8241(2) 0.32217(17) 0.0250(5) Uani 1 1 d . . .
H38 H 0.6250 0.8889 0.3015 0.030 Uiso 1 1 calc R . .
C39 C 0.5935(2) 0.8167(2) 0.40519(17) 0.0250(5) Uani 1 1 d . . .
H39 H 0.5866 0.8756 0.4409 0.030 Uiso 1 1 calc R . .
C40 C 0.5815(2) 0.7228(2) 0.43621(16) 0.0241(5) Uani 1 1 d . . .
H40 H 0.5665 0.7173 0.4932 0.029 Uiso 1 1 calc R . .
C41 C 0.5916(2) 0.63689(19) 0.38375(15) 0.0192(4) Uani 1 1 d . . .
H41 H 0.5845 0.5732 0.4056 0.023 Uiso 1 1 calc R . .
C42 C 0.77186(18) 0.54529(18) 0.26625(14) 0.0148(4) Uani 1 1 d . . .
C47 C 0.8507(2) 0.6303(2) 0.33358(16) 0.0223(5) Uani 1 1 d . . .
H47 H 0.8282 0.6831 0.3623 0.027 Uiso 1 1 calc R . .
C46 C 0.9633(2) 0.6377(2) 0.35894(18) 0.0286(6) Uani 1 1 d . . .
H46 H 1.0171 0.6959 0.4049 0.034 Uiso 1 1 calc R . .
C45 C 0.9968(2) 0.5612(2) 0.31756(17) 0.0253(5) Uani 1 1 d . . .
H45 H 1.0733 0.5665 0.3352 0.030 Uiso 1 1 calc R . .
C44 C 0.9184(2) 0.4767(2) 0.25040(17) 0.0245(5) Uani 1 1 d . . .
H44 H 0.9414 0.4242 0.2216 0.029 Uiso 1 1 calc R . .
C43 C 0.8061(2) 0.4682(2) 0.22493(16) 0.0205(5) Uani 1 1 d . . .
H43 H 0.7525 0.4095 0.1792 0.025 Uiso 1 1 calc R . .
C24 C 0.26116(19) 0.29221(18) 0.31959(14) 0.0157(4) Uani 1 1 d . . .
C25 C 0.1456(2) 0.2321(2) 0.31702(17) 0.0278(6) Uani 1 1 d . . .
H25 H 0.1071 0.1613 0.2804 0.033 Uiso 1 1 calc R . .
C26 C 0.0860(2) 0.2752(3) 0.3677(2) 0.0356(7) Uani 1 1 d . . .
H26 H 0.0069 0.2344 0.3642 0.043 Uiso 1 1 calc R . .
C27 C 0.1416(2) 0.3767(2) 0.42289(17) 0.0284(6) Uani 1 1 d . . .
H27 H 0.1012 0.4055 0.4579 0.034 Uiso 1 1 calc R . .
C28 C 0.2562(2) 0.4362(2) 0.42700(17) 0.0251(5) Uani 1 1 d . . .
H28 H 0.2949 0.5059 0.4654 0.030 Uiso 1 1 calc R . .
C29 C 0.3151(2) 0.39466(19) 0.37518(15) 0.0191(4) Uani 1 1 d . . .
H29 H 0.3936 0.4370 0.3778 0.023 Uiso 1 1 calc R . .
C30 C 0.35922(19) 0.13023(17) 0.28444(14) 0.0157(4) Uani 1 1 d . . .
C35 C 0.4252(2) 0.0863(2) 0.24193(17) 0.0242(5) Uani 1 1 d . . .
H35 H 0.4571 0.1167 0.1961 0.029 Uiso 1 1 calc R . .
C34 C 0.4444(2) -0.0010(2) 0.26608(19) 0.0292(6) Uani 1 1 d . . .
H34 H 0.4884 -0.0311 0.2363 0.035 Uiso 1 1 calc R . .
C33 C 0.3994(2) -0.0448(2) 0.33403(17) 0.0279(6) Uani 1 1 d . . .
H33 H 0.4124 -0.1050 0.3505 0.033 Uiso 1 1 calc R . .
C32 C 0.3361(2) -0.0009(2) 0.37727(16) 0.0262(5) Uani 1 1 d . . .
H32 H 0.3063 -0.0303 0.4242 0.031 Uiso 1 1 calc R . .
C31 C 0.3153(2) 0.08652(19) 0.35268(16) 0.0215(5) Uani 1 1 d . . .
H31 H 0.2712 0.1162 0.3826 0.026 Uiso 1 1 calc R . .
Cl11 Cl 0.75880(7) 0.12077(6) 0.41530(5) 0.03912(18) Uani 1 1 d . . .
Cl12 Cl 0.84170(6) 0.35148(6) 0.42254(5) 0.03342(16) Uani 1 1 d . . .
Cl13 Cl 0.69138(7) 0.25655(6) 0.53448(5) 0.03640(17) Uani 1 1 d . . .
C51 C 0.7254(2) 0.2362(2) 0.43087(17) 0.0250(5) Uani 1 1 d . . .
D51 D 0.6571 0.2240 0.38357 0.030 Uiso 1 1 d R . .

loop_
_atom_site_aniso_label
_atom_site_aniso_U_11
_atom_site_aniso_U_22
_atom_site_aniso_U_33
_atom_site_aniso_U_23
_atom_site_aniso_U_13
_atom_site_aniso_U_12
Ni 0.01485(13) 0.01307(14) 0.01136(13) 0.00278(10) 0.00251(10) 0.00529(11)
Cl1 0.0203(2) 0.0183(3) 0.0136(2) 0.00390(19) 0.00050(19) 0.0079(2)
P2 0.0146(2) 0.0117(2) 0.0118(2) 0.00234(19) 0.00244(19) 0.0057(2)
P1 0.0150(2) 0.0121(2) 0.0115(2) 0.00263(19) 0.00374(19) 0.0062(2)
N1 0.0170(8) 0.0118(8) 0.0119(8) 0.0012(7) 0.0035(7) 0.0049(7)
C13 0.0161(10) 0.0119(9) 0.0121(9) 0.0024(7) 0.0019(7) 0.0064(8)
C12 0.0174(10) 0.0165(10) 0.0116(10) 0.0025(8) 0.0022(8) 0.0077(8)
C11 0.0210(11) 0.0143(10) 0.0153(10) 0.0025(8) 0.0024(8) 0.0060(9)
C10 0.0231(11) 0.0133(10) 0.0151(10) 0.0025(8) 0.0018(8) 0.0068(9)
C9 0.0251(11) 0.0161(10) 0.0134(10) 0.0014(8) 0.0044(8) 0.0105(9)
C8 0.0203(10) 0.0137(10) 0.0124(10) 0.0051(8) 0.0037(8) 0.0085(8)
C7 0.0180(10) 0.0149(10) 0.0118(9) 0.0031(8) 0.0026(8) 0.0101(8)
C6 0.0204(10) 0.0164(10) 0.0142(10) 0.0050(8) 0.0055(8) 0.0119(9)
C5 0.0190(10) 0.0217(11) 0.0154(10) 0.0070(9) 0.0063(8) 0.0129(9)
C4 0.0163(10) 0.0182(10) 0.0139(10) 0.0065(8) 0.0050(8) 0.0078(8)
C3 0.0176(10) 0.0165(10) 0.0093(9) 0.0038(8) 0.0020(7) 0.0084(8)
C2 0.0147(9) 0.0123(9) 0.0137(10) 0.0047(8) 0.0027(7) 0.0068(8)
C15 0.0162(9) 0.0112(9) 0.0119(10) 0.0027(7) 0.0012(8) 0.0040(8)
C14 0.0155(10) 0.0164(10) 0.0147(10) 0.0026(8) 0.0036(8) 0.0048(8)
C20 0.0321(13) 0.0132(10) 0.0206(12) 0.0005(9) 0.0048(10) 0.0076(10)
C23 0.065(2) 0.0255(15) 0.0379(17) 0.0056(12) 0.0019(15) 0.0228(15)
C22 0.054(2) 0.0228(15) 0.077(3) -0.0244(16) -0.0372(19) 0.0164(15)
C21 0.128(4) 0.0187(15) 0.063(2) -0.0134(15) 0.064(3) -0.005(2)
C16 0.0221(11) 0.0257(12) 0.0178(11) 0.0083(9) 0.0105(9) 0.0127(10)
C19 0.064(2) 0.0417(19) 0.046(2) -0.0047(15) 0.0399(18) 0.0056(17)
C17 0.0276(15) 0.104(3) 0.0445(19) 0.036(2) 0.0190(14) 0.0315(18)
C18 0.068(2) 0.055(2) 0.051(2) 0.0365(17) 0.0430(18) 0.0427(19)
C36 0.0158(10) 0.0155(10) 0.0166(10) 0.0008(8) 0.0016(8) 0.0069(8)
C37 0.0283(12) 0.0168(11) 0.0180(11) 0.0030(9) 0.0025(9) 0.0121(10)
C38 0.0373(14) 0.0180(11) 0.0227(12) 0.0009(9) 0.0019(10) 0.0177(11)
C39 0.0311(13) 0.0226(12) 0.0227(12) -0.0037(10) 0.0010(10) 0.0172(11)
C40 0.0294(13) 0.0228(12) 0.0187(12) -0.0017(9) 0.0058(10) 0.0110(10)
C41 0.0234(11) 0.0158(10) 0.0165(11) 0.0005(8) 0.0045(9) 0.0066(9)
C42 0.0138(9) 0.0158(10) 0.0142(10) 0.0037(8) 0.0027(8) 0.0052(8)
C47 0.0191(11) 0.0239(12) 0.0214(12) -0.0001(9) 0.0014(9) 0.0087(10)
C46 0.0191(11) 0.0324(14) 0.0259(13) 0.0015(11) -0.0022(10) 0.0055(10)
C45 0.0177(11) 0.0348(14) 0.0260(13) 0.0126(11) 0.0054(9) 0.0110(10)
C44 0.0228(12) 0.0292(13) 0.0278(13) 0.0081(10) 0.0098(10) 0.0152(10)
C43 0.0192(11) 0.0232(12) 0.0210(11) 0.0024(9) 0.0041(9) 0.0116(9)
C24 0.0186(10) 0.0183(10) 0.0128(10) 0.0036(8) 0.0044(8) 0.0096(9)
C25 0.0224(12) 0.0299(14) 0.0260(13) -0.0025(11) 0.0094(10) 0.0060(11)
C26 0.0231(13) 0.0419(17) 0.0369(16) -0.0037(13) 0.0136(11) 0.0089(12)
C27 0.0308(13) 0.0389(15) 0.0215(12) 0.0005(11) 0.0098(10) 0.0211(12)
C28 0.0306(13) 0.0264(13) 0.0200(12) -0.0008(10) 0.0035(10) 0.0164(11)
C29 0.0201(11) 0.0184(11) 0.0191(11) 0.0005(9) 0.0022(9) 0.0101(9)
C30 0.0175(10) 0.0127(10) 0.0150(10) 0.0008(8) 0.0008(8) 0.0058(8)
C35 0.0309(13) 0.0276(13) 0.0252(13) 0.0132(10) 0.0146(10) 0.0181(11)
C34 0.0390(15) 0.0292(14) 0.0327(14) 0.0125(11) 0.0144(12) 0.0241(12)
C33 0.0424(15) 0.0207(12) 0.0256(13) 0.0095(10) 0.0066(11) 0.0170(12)
C32 0.0451(15) 0.0172(11) 0.0176(11) 0.0087(9) 0.0091(11) 0.0115(11)
C31 0.0335(13) 0.0159(11) 0.0175(11) 0.0050(9) 0.0101(10) 0.0103(10)
Cl11 0.0585(5) 0.0314(4) 0.0428(4) 0.0127(3) 0.0214(4) 0.0294(4)
Cl12 0.0283(3) 0.0340(4) 0.0449(4) 0.0190(3) 0.0143(3) 0.0139(3)
Cl13 0.0516(4) 0.0349(4) 0.0390(4) 0.0179(3) 0.0275(3) 0.0250(3)
C51 0.0304(13) 0.0240(12) 0.0268(13) 0.0098(10) 0.0091(10) 0.0152(11)

_geom_special_details
;
 All esds (except the esd in the dihedral angle between two l.s. planes)
 are estimated using the full covariance matrix.  The cell esds are taken
 into account individually in the estimation of esds in distances, angles
 and torsion angles; correlations between esds in cell parameters are only
 used when they are defined by crystal symmetry.  An approximate (isotropic)
 treatment of cell esds is used for estimating esds involving l.s. planes.
;

loop_
_geom_bond_atom_site_label_1
_geom_bond_atom_site_label_2
_geom_bond_distance
_geom_bond_site_symmetry_2
_geom_bond_publ_flag
Ni N1 1.9187(18) . ?
Ni Cl1 2.1855(6) . ?
Ni P1 2.1994(6) . ?
Ni P2 2.2243(6) . ?
P2 C42 1.817(2) . ?
P2 C15 1.820(2) . ?
P2 C36 1.821(2) . ?
P1 C30 1.810(2) . ?
P1 C24 1.817(2) . ?
P1 C14 1.823(2) . ?
N1 C2 1.404(3) . ?
N1 C13 1.406(3) . ?
C13 C12 1.401(3) . ?
C13 C8 1.412(3) . ?
C12 C11 1.384(3) . ?
C12 C14 1.500(3) . ?
C11 C10 1.414(3) . ?
C11 H11 0.9500 . ?
C10 C9 1.381(3) . ?
C10 C20 1.532(3) . ?
C9 C8 1.401(3) . ?
C9 H9 0.9500 . ?
C8 C7 1.439(3) . ?
C7 C6 1.396(3) . ?
C7 C2 1.413(3) . ?
C6 C5 1.387(3) . ?
C6 H6 0.9500 . ?
C5 C4 1.411(3) . ?
C5 C16 1.535(3) . ?
C4 C3 1.390(3) . ?
C4 H4 0.9500 . ?
C3 C2 1.399(3) . ?
C3 C15 1.498(3) . ?
C15 H15A 0.9900 . ?
C15 H15B 0.9900 . ?
C14 H14A 0.9900 . ?
C14 H14B 0.9900 . ?
C20 C22 1.513(4) . ?
C20 C23 1.518(4) . ?
C20 C21 1.538(4) . ?
C23 H23A 0.9800 . ?
C23 H23B 0.9800 . ?
C23 H23C 0.9800 . ?
C22 H22A 0.9800 . ?
C22 H22B 0.9800 . ?
C22 H22C 0.9800 . ?
C21 H21A 0.9800 . ?
C21 H21B 0.9800 . ?
C21 H21C 0.9800 . ?
C16 C18 1.510(4) . ?
C16 C17 1.523(4) . ?
C16 C19 1.524(4) . ?
C19 H19A 0.9800 . ?
C19 H19B 0.9800 . ?
C19 H19C 0.9800 . ?
C17 H17A 0.9800 . ?
C17 H17B 0.9800 . ?
C17 H17C 0.9800 . ?
C18 H18A 0.9800 . ?
C18 H18B 0.9800 . ?
C18 H18C 0.9800 . ?
C36 C37 1.396(3) . ?
C36 C41 1.399(3) . ?
C37 C38 1.390(3) . ?
C37 H37 0.9500 . ?
C38 C39 1.382(4) . ?
C38 H38 0.9500 . ?
C39 C40 1.389(4) . ?
C39 H39 0.9500 . ?
C40 C41 1.388(3) . ?
C40 H40 0.9500 . ?
C41 H41 0.9500 . ?
C42 C47 1.390(3) . ?
C42 C43 1.394(3) . ?
C47 C46 1.400(3) . ?
C47 H47 0.9500 . ?
C46 C45 1.382(4) . ?
C46 H46 0.9500 . ?
C45 C44 1.384(4) . ?
C45 H45 0.9500 . ?
C44 C43 1.392(3) . ?
C44 H44 0.9500 . ?
C43 H43 0.9500 . ?
C24 C29 1.390(3) . ?
C24 C25 1.397(3) . ?
C25 C26 1.395(4) . ?
C25 H25 0.9500 . ?
C26 C27 1.379(4) . ?
C26 H26 0.9500 . ?
C27 C28 1.379(4) . ?
C27 H27 0.9500 . ?
C28 C29 1.389(3) . ?
C28 H28 0.9500 . ?
C29 H29 0.9500 . ?
C30 C31 1.389(3) . ?
C30 C35 1.398(3) . ?
C35 C34 1.382(3) . ?
C35 H35 0.9500 . ?
C34 C33 1.391(4) . ?
C34 H34 0.9500 . ?
C33 C32 1.376(4) . ?
C33 H33 0.9500 . ?
C32 C31 1.395(3) . ?
C32 H32 0.9500 . ?
C31 H31 0.9500 . ?
Cl11 C51 1.763(3) . ?
Cl12 C51 1.758(3) . ?
Cl13 C51 1.757(3) . ?
C51 D51 1.0000 . ?

loop_
_geom_angle_atom_site_label_1
_geom_angle_atom_site_label_2
_geom_angle_atom_site_label_3
_geom_angle
_geom_angle_site_symmetry_1
_geom_angle_site_symmetry_3
_geom_angle_publ_flag
N1 Ni Cl1 160.29(6) . . ?
N1 Ni P1 95.00(6) . . ?
Cl1 Ni P1 86.16(2) . . ?
N1 Ni P2 95.69(6) . . ?
Cl1 Ni P2 89.42(2) . . ?
P1 Ni P2 159.99(2) . . ?
C42 P2 C15 105.68(10) . . ?
C42 P2 C36 105.19(10) . . ?
C15 P2 C36 103.87(10) . . ?
C42 P2 Ni 115.87(7) . . ?
C15 P2 Ni 109.89(7) . . ?
C36 P2 Ni 115.27(8) . . ?
C30 P1 C24 108.09(10) . . ?
C30 P1 C14 103.62(10) . . ?
C24 P1 C14 104.01(10) . . ?
C30 P1 Ni 113.75(7) . . ?
C24 P1 Ni 114.75(8) . . ?
C14 P1 Ni 111.61(7) . . ?
C2 N1 C13 104.30(17) . . ?
C2 N1 Ni 120.02(14) . . ?
C13 N1 Ni 120.26(14) . . ?
C12 C13 N1 129.45(19) . . ?
C12 C13 C8 118.78(19) . . ?
N1 C13 C8 111.71(18) . . ?
C11 C12 C13 118.2(2) . . ?
C11 C12 C14 121.3(2) . . ?
C13 C12 C14 120.57(19) . . ?
C12 C11 C10 123.8(2) . . ?
C12 C11 H11 118.1 . . ?
C10 C11 H11 118.1 . . ?
C9 C10 C11 117.4(2) . . ?
C9 C10 C20 123.0(2) . . ?
C11 C10 C20 119.6(2) . . ?
C10 C9 C8 120.1(2) . . ?
C10 C9 H9 119.9 . . ?
C8 C9 H9 119.9 . . ?
C9 C8 C13 121.5(2) . . ?
C9 C8 C7 132.4(2) . . ?
C13 C8 C7 106.15(18) . . ?
C6 C7 C2 121.8(2) . . ?
C6 C7 C8 132.2(2) . . ?
C2 C7 C8 105.87(18) . . ?
C5 C6 C7 119.7(2) . . ?
C5 C6 H6 120.1 . . ?
C7 C6 H6 120.1 . . ?
C6 C5 C4 117.9(2) . . ?
C6 C5 C16 122.1(2) . . ?
C4 C5 C16 120.0(2) . . ?
C3 C4 C5 123.4(2) . . ?
C3 C4 H4 118.3 . . ?
C5 C4 H4 118.3 . . ?
C4 C3 C2 118.2(2) . . ?
C4 C3 C15 120.88(19) . . ?
C2 C3 C15 120.85(19) . . ?
C3 C2 N1 129.10(19) . . ?
C3 C2 C7 118.82(19) . . ?
N1 C2 C7 111.90(18) . . ?
C3 C15 P2 110.35(14) . . ?
C3 C15 H15A 109.6 . . ?
P2 C15 H15A 109.6 . . ?
C3 C15 H15B 109.6 . . ?
P2 C15 H15B 109.6 . . ?
H15A C15 H15B 108.1 . . ?
C12 C14 P1 108.87(15) . . ?
C12 C14 H14A 109.9 . . ?
P1 C14 H14A 109.9 . . ?
C12 C14 H14B 109.9 . . ?
P1 C14 H14B 109.9 . . ?
H14A C14 H14B 108.3 . . ?
C22 C20 C23 110.2(3) . . ?
C22 C20 C10 109.7(2) . . ?
C23 C20 C10 109.7(2) . . ?
C22 C20 C21 108.6(3) . . ?
C23 C20 C21 106.6(3) . . ?
C10 C20 C21 112.0(2) . . ?
C20 C23 H23A 109.5 . . ?
C20 C23 H23B 109.5 . . ?
H23A C23 H23B 109.5 . . ?
C20 C23 H23C 109.5 . . ?
H23A C23 H23C 109.5 . . ?
H23B C23 H23C 109.5 . . ?
C20 C22 H22A 109.5 . . ?
C20 C22 H22B 109.5 . . ?
H22A C22 H22B 109.5 . . ?
C20 C22 H22C 109.5 . . ?
H22A C22 H22C 109.5 . . ?
H22B C22 H22C 109.5 . . ?
C20 C21 H21A 109.5 . . ?
C20 C21 H21B 109.5 . . ?
H21A C21 H21B 109.5 . . ?
C20 C21 H21C 109.5 . . ?
H21A C21 H21C 109.5 . . ?
H21B C21 H21C 109.5 . . ?
C18 C16 C17 110.3(3) . . ?
C18 C16 C19 108.4(3) . . ?
C17 C16 C19 107.7(3) . . ?
C18 C16 C5 110.2(2) . . ?
C17 C16 C5 108.1(2) . . ?
C19 C16 C5 112.0(2) . . ?
C16 C19 H19A 109.5 . . ?
C16 C19 H19B 109.5 . . ?
H19A C19 H19B 109.5 . . ?
C16 C19 H19C 109.5 . . ?
H19A C19 H19C 109.5 . . ?
H19B C19 H19C 109.5 . . ?
C16 C17 H17A 109.5 . . ?
C16 C17 H17B 109.5 . . ?
H17A C17 H17B 109.5 . . ?
C16 C17 H17C 109.5 . . ?
H17A C17 H17C 109.5 . . ?
H17B C17 H17C 109.5 . . ?
C16 C18 H18A 109.5 . . ?
C16 C18 H18B 109.5 . . ?
H18A C18 H18B 109.5 . . ?
C16 C18 H18C 109.5 . . ?
H18A C18 H18C 109.5 . . ?
H18B C18 H18C 109.5 . . ?
C37 C36 C41 118.5(2) . . ?
C37 C36 P2 120.66(17) . . ?
C41 C36 P2 120.80(17) . . ?
C38 C37 C36 120.4(2) . . ?
C38 C37 H37 119.8 . . ?
C36 C37 H37 119.8 . . ?
C39 C38 C37 120.5(2) . . ?
C39 C38 H38 119.7 . . ?
C37 C38 H38 119.7 . . ?
C38 C39 C40 119.8(2) . . ?
C38 C39 H39 120.1 . . ?
C40 C39 H39 120.1 . . ?
C41 C40 C39 119.8(2) . . ?
C41 C40 H40 120.1 . . ?
C39 C40 H40 120.1 . . ?
C40 C41 C36 120.9(2) . . ?
C40 C41 H41 119.6 . . ?
C36 C41 H41 119.6 . . ?
C47 C42 C43 119.4(2) . . ?
C47 C42 P2 122.50(17) . . ?
C43 C42 P2 118.09(17) . . ?
C42 C47 C46 119.8(2) . . ?
C42 C47 H47 120.1 . . ?
C46 C47 H47 120.1 . . ?
C45 C46 C47 120.5(2) . . ?
C45 C46 H46 119.7 . . ?
C47 C46 H46 119.7 . . ?
C46 C45 C44 119.7(2) . . ?
C46 C45 H45 120.2 . . ?
C44 C45 H45 120.2 . . ?
C45 C44 C43 120.3(2) . . ?
C45 C44 H44 119.9 . . ?
C43 C44 H44 119.9 . . ?
C44 C43 C42 120.3(2) . . ?
C44 C43 H43 119.9 . . ?
C42 C43 H43 119.9 . . ?
C29 C24 C25 118.1(2) . . ?
C29 C24 P1 121.28(17) . . ?
C25 C24 P1 120.48(18) . . ?
C26 C25 C24 120.6(2) . . ?
C26 C25 H25 119.7 . . ?
C24 C25 H25 119.7 . . ?
C27 C26 C25 120.3(3) . . ?
C27 C26 H26 119.9 . . ?
C25 C26 H26 119.9 . . ?
C28 C27 C26 119.7(2) . . ?
C28 C27 H27 120.1 . . ?
C26 C27 H27 120.1 . . ?
C27 C28 C29 120.2(2) . . ?
C27 C28 H28 119.9 . . ?
C29 C28 H28 119.9 . . ?
C28 C29 C24 121.1(2) . . ?
C28 C29 H29 119.4 . . ?
C24 C29 H29 119.4 . . ?
C31 C30 C35 119.1(2) . . ?
C31 C30 P1 123.55(18) . . ?
C35 C30 P1 117.35(17) . . ?
C34 C35 C30 120.5(2) . . ?
C34 C35 H35 119.8 . . ?
C30 C35 H35 119.8 . . ?
C35 C34 C33 120.1(2) . . ?
C35 C34 H34 120.0 . . ?
C33 C34 H34 120.0 . . ?
C32 C33 C34 119.8(2) . . ?
C32 C33 H33 120.1 . . ?
C34 C33 H33 120.1 . . ?
C33 C32 C31 120.5(2) . . ?
C33 C32 H32 119.8 . . ?
C31 C32 H32 119.8 . . ?
C30 C31 C32 120.0(2) . . ?
C30 C31 H31 120.0 . . ?
C32 C31 H31 120.0 . . ?
D51 C51 Cl13 108.70(9) . . ?
D51 C51 Cl12 108.70(9) . . ?
Cl13 C51 Cl12 110.28(15) . . ?
D51 C51 Cl11 108.70(9) . . ?
Cl13 C51 Cl11 110.33(14) . . ?
Cl12 C51 Cl11 110.09(14) . . ?

loop_
_geom_torsion_atom_site_label_1
_geom_torsion_atom_site_label_2
_geom_torsion_atom_site_label_3
_geom_torsion_atom_site_label_4
_geom_torsion
_geom_torsion_site_symmetry_1
_geom_torsion_site_symmetry_2
_geom_torsion_site_symmetry_3
_geom_torsion_site_symmetry_4
_geom_torsion_publ_flag
N1 Ni P2 C42 -108.78(10) . . . . ?
Cl1 Ni P2 C42 52.14(8) . . . . ?
P1 Ni P2 C42 129.23(10) . . . . ?
N1 Ni P2 C15 10.88(9) . . . . ?
Cl1 Ni P2 C15 171.80(8) . . . . ?
P1 Ni P2 C15 -111.11(10) . . . . ?
N1 Ni P2 C36 127.79(10) . . . . ?
Cl1 Ni P2 C36 -71.28(8) . . . . ?
P1 Ni P2 C36 5.81(11) . . . . ?
N1 Ni P1 C30 106.13(10) . . . . ?
Cl1 Ni P1 C30 -54.13(8) . . . . ?
P2 Ni P1 C30 -131.78(10) . . . . ?
N1 Ni P1 C24 -128.66(10) . . . . ?
Cl1 Ni P1 C24 71.07(8) . . . . ?
P2 Ni P1 C24 -6.58(11) . . . . ?
N1 Ni P1 C14 -10.68(10) . . . . ?
Cl1 Ni P1 C14 -170.94(8) . . . . ?
P2 Ni P1 C14 111.41(10) . . . . ?
Cl1 Ni N1 C2 -71.8(2) . . . . ?
P1 Ni N1 C2 -164.43(15) . . . . ?
P2 Ni N1 C2 32.51(16) . . . . ?
Cl1 Ni N1 C13 60.0(3) . . . . ?
P1 Ni N1 C13 -32.57(16) . . . . ?
P2 Ni N1 C13 164.38(15) . . . . ?
C2 N1 C13 C12 -174.4(2) . . . . ?
Ni N1 C13 C12 47.3(3) . . . . ?
C2 N1 C13 C8 2.7(2) . . . . ?
Ni N1 C13 C8 -135.59(16) . . . . ?
N1 C13 C12 C11 -177.7(2) . . . . ?
C8 C13 C12 C11 5.4(3) . . . . ?
N1 C13 C12 C14 3.4(3) . . . . ?
C8 C13 C12 C14 -173.53(19) . . . . ?
C13 C12 C11 C10 -2.0(3) . . . . ?
C14 C12 C11 C10 176.9(2) . . . . ?
C12 C11 C10 C9 -1.9(3) . . . . ?
C12 C11 C10 C20 178.3(2) . . . . ?
C11 C10 C9 C8 2.3(3) . . . . ?
C20 C10 C9 C8 -177.9(2) . . . . ?
C10 C9 C8 C13 1.1(3) . . . . ?
C10 C9 C8 C7 -179.2(2) . . . . ?
C12 C13 C8 C9 -5.1(3) . . . . ?
N1 C13 C8 C9 177.49(19) . . . . ?
C12 C13 C8 C7 175.17(19) . . . . ?
N1 C13 C8 C7 -2.2(2) . . . . ?
C9 C8 C7 C6 3.6(4) . . . . ?
C13 C8 C7 C6 -176.7(2) . . . . ?
C9 C8 C7 C2 -178.9(2) . . . . ?
C13 C8 C7 C2 0.8(2) . . . . ?
C2 C7 C6 C5 -0.3(3) . . . . ?
C8 C7 C6 C5 176.9(2) . . . . ?
C7 C6 C5 C4 -1.5(3) . . . . ?
C7 C6 C5 C16 178.0(2) . . . . ?
C6 C5 C4 C3 0.5(3) . . . . ?
C16 C5 C4 C3 -179.0(2) . . . . ?
C5 C4 C3 C2 2.2(3) . . . . ?
C5 C4 C3 C15 -175.8(2) . . . . ?
C4 C3 C2 N1 -178.6(2) . . . . ?
C15 C3 C2 N1 -0.6(3) . . . . ?
C4 C3 C2 C7 -3.9(3) . . . . ?
C15 C3 C2 C7 174.09(19) . . . . ?
C13 N1 C2 C3 172.9(2) . . . . ?
Ni N1 C2 C3 -48.7(3) . . . . ?
C13 N1 C2 C7 -2.1(2) . . . . ?
Ni N1 C2 C7 136.27(15) . . . . ?
C6 C7 C2 C3 3.0(3) . . . . ?
C8 C7 C2 C3 -174.76(19) . . . . ?
C6 C7 C2 N1 178.64(19) . . . . ?
C8 C7 C2 N1 0.8(2) . . . . ?
C4 C3 C15 P2 -130.59(18) . . . . ?
C2 C3 C15 P2 51.5(2) . . . . ?
C42 P2 C15 C3 76.56(16) . . . . ?
C36 P2 C15 C3 -172.98(15) . . . . ?
Ni P2 C15 C3 -49.14(16) . . . . ?
C11 C12 C14 P1 128.81(19) . . . . ?
C13 C12 C14 P1 -52.3(2) . . . . ?
C30 P1 C14 C12 -73.56(17) . . . . ?
C24 P1 C14 C12 173.50(15) . . . . ?
Ni P1 C14 C12 49.24(17) . . . . ?
C9 C10 C20 C22 -119.3(3) . . . . ?
C11 C10 C20 C22 60.4(3) . . . . ?
C9 C10 C20 C23 119.5(3) . . . . ?
C11 C10 C20 C23 -60.8(3) . . . . ?
C9 C10 C20 C21 1.4(4) . . . . ?
C11 C10 C20 C21 -178.9(3) . . . . ?
C6 C5 C16 C18 126.6(3) . . . . ?
C4 C5 C16 C18 -53.9(3) . . . . ?
C6 C5 C16 C17 -112.7(3) . . . . ?
C4 C5 C16 C17 66.8(3) . . . . ?
C6 C5 C16 C19 5.9(3) . . . . ?
C4 C5 C16 C19 -174.7(3) . . . . ?
C42 P2 C36 C37 96.6(2) . . . . ?
C15 P2 C36 C37 -14.2(2) . . . . ?
Ni P2 C36 C37 -134.46(17) . . . . ?
C42 P2 C36 C41 -83.3(2) . . . . ?
C15 P2 C36 C41 165.90(18) . . . . ?
Ni P2 C36 C41 45.6(2) . . . . ?
C41 C36 C37 C38 0.5(3) . . . . ?
P2 C36 C37 C38 -179.41(19) . . . . ?
C36 C37 C38 C39 -1.4(4) . . . . ?
C37 C38 C39 C40 1.2(4) . . . . ?
C38 C39 C40 C41 0.0(4) . . . . ?
C39 C40 C41 C36 -0.9(4) . . . . ?
C37 C36 C41 C40 0.7(3) . . . . ?
P2 C36 C41 C40 -179.40(18) . . . . ?
C15 P2 C42 C47 109.5(2) . . . . ?
C36 P2 C42 C47 0.0(2) . . . . ?
Ni P2 C42 C47 -128.59(18) . . . . ?
C15 P2 C42 C43 -71.1(2) . . . . ?
C36 P2 C42 C43 179.36(18) . . . . ?
Ni P2 C42 C43 50.8(2) . . . . ?
C43 C42 C47 C46 0.2(4) . . . . ?
P2 C42 C47 C46 179.60(19) . . . . ?
C42 C47 C46 C45 -0.1(4) . . . . ?
C47 C46 C45 C44 0.2(4) . . . . ?
C46 C45 C44 C43 -0.5(4) . . . . ?
C45 C44 C43 C42 0.6(4) . . . . ?
C47 C42 C43 C44 -0.5(4) . . . . ?
P2 C42 C43 C44 -179.92(19) . . . . ?
C30 P1 C24 C29 111.9(2) . . . . ?
C14 P1 C24 C29 -138.46(19) . . . . ?
Ni P1 C24 C29 -16.3(2) . . . . ?
C30 P1 C24 C25 -73.0(2) . . . . ?
C14 P1 C24 C25 36.7(2) . . . . ?
Ni P1 C24 C25 158.93(18) . . . . ?
C29 C24 C25 C26 1.2(4) . . . . ?
P1 C24 C25 C26 -174.1(2) . . . . ?
C24 C25 C26 C27 -1.7(5) . . . . ?
C25 C26 C27 C28 0.8(5) . . . . ?
C26 C27 C28 C29 0.6(4) . . . . ?
C27 C28 C29 C24 -1.1(4) . . . . ?
C25 C24 C29 C28 0.2(4) . . . . ?
P1 C24 C29 C28 175.49(19) . . . . ?
C24 P1 C30 C31 6.8(2) . . . . ?
C14 P1 C30 C31 -103.1(2) . . . . ?
Ni P1 C30 C31 135.51(18) . . . . ?
C24 P1 C30 C35 -173.78(18) . . . . ?
C14 P1 C30 C35 76.3(2) . . . . ?
Ni P1 C30 C35 -45.1(2) . . . . ?
C31 C30 C35 C34 1.4(4) . . . . ?
P1 C30 C35 C34 -178.0(2) . . . . ?
C30 C35 C34 C33 -1.0(4) . . . . ?
C35 C34 C33 C32 -0.2(4) . . . . ?
C34 C33 C32 C31 0.9(4) . . . . ?
C35 C30 C31 C32 -0.8(4) . . . . ?
P1 C30 C31 C32 178.59(19) . . . . ?
C33 C32 C31 C30 -0.4(4) . . . . ?

_diffrn_measured_fraction_theta_max 0.997
_diffrn_reflns_theta_full        30.51
_diffrn_measured_fraction_theta_full 0.997
_refine_diff_density_max         0.864
_refine_diff_density_min         -0.658
_refine_diff_density_rms         0.108

_diffrn_ambient_environment      'perfluoro polyether oil'
_diffrn_measurement_device       'three-circle diffractometer'
_diffrn_measurement_specimen_support 'polyimid foil'
_diffrn_detector                 'CCD plate'
_diffrn_detector_type            CCD-PXL-KAF2
_refine_ls_abs_structure_details 'Flack H D (1983), Acta Cryst. A39, 876-881'

# SQUEEZE RESULTS (APPEND TO CIF)
# Ref.: P. v. d. Sluis, A. L. Spek, Acta Cryst. 1990, A46, 194.
# Note: Data are Listed for all Voids in the P1 Unit Cell
# i.e. Centre of Gravity, Solvent Accessible Volume,
# Recovered number of Electrons in the Void and
# Details about the Squeezed Material
loop_
_platon_squeeze_void_nr
_platon_squeeze_void_average_x
_platon_squeeze_void_average_y
_platon_squeeze_void_average_z
_platon_squeeze_void_volume
_platon_squeeze_void_count_electrons
_platon_squeeze_void_content
1 0.000 0.000 0.500 433 202 'disordered CDCl3'
_platon_squeeze_details
;
;


#==end==


data_complex_9b

_audit_creation_method           SHELXL-97
_audit_block_code                ga_ng20
_audit_block_refno               1447
_audit_update_record             'Mon Jun 18 14:46:50 CEST 2012'

_audit_block_usercomment         ng198-03


_chemical_name_systematic        ?
_chemical_name_common            ?
_chemical_formula_moiety         ?
_chemical_formula_sum            'C47 H47 Br Cl3 N Ni P2'
_chemical_melting_point          ?

_exptl_crystal_description       plate
_exptl_crystal_colour            red

_diffrn_ambient_temperature      100(2)
_chemical_formula_weight         932.77

loop_
_atom_type_symbol
_atom_type_description
_atom_type_scat_dispersion_real
_atom_type_scat_dispersion_imag
_atom_type_scat_source
C C 0.0033 0.0016 'International Tables Vol C Tables 4.2.6.8 and 6.1.1.4'
H H 0.0000 0.0000 'International Tables Vol C Tables 4.2.6.8 and 6.1.1.4'
N N 0.0061 0.0033 'International Tables Vol C Tables 4.2.6.8 and 6.1.1.4'
P P 0.1023 0.0942 'International Tables Vol C Tables 4.2.6.8 and 6.1.1.4'
Ni Ni 0.3393 1.1124 'International Tables Vol C Tables 4.2.6.8 and 6.1.1.4'
Br Br -0.2901 2.4595 'International Tables Vol C Tables 4.2.6.8 and 6.1.1.4'
Cl Cl 0.1484 0.1585 'International Tables Vol C Tables 4.2.6.8 and 6.1.1.4'

_symmetry_cell_setting           triclinic
_symmetry_space_group_name_H-M   'P -1'
_symmetry_int_tables_number      2

_chemical_absolute_configuration .

loop_
_symmetry_equiv_pos_as_xyz
'x, y, z'
'-x, -y, -z'

_cell_length_a                   12.639(6)
_cell_length_b                   14.010(7)
_cell_length_c                   14.816(8)
_cell_angle_alpha                62.554(11)
_cell_angle_beta                 76.346(10)
_cell_angle_gamma                68.730(13)
_cell_volume                     2162.1(19)
_cell_formula_units_Z            2
_cell_measurement_temperature    100(2)
_cell_measurement_reflns_used    5529
_cell_measurement_theta_min      2.42
_cell_measurement_theta_max      25.44
_exptl_crystal_size_max          0.14
_exptl_crystal_size_mid          0.07
_exptl_crystal_size_min          0.06
_exptl_crystal_density_meas      ?
_exptl_crystal_density_diffrn    1.433
_exptl_crystal_density_method    'not measured'
_exptl_crystal_F_000             960
loop_
 _exptl_crystal_face_index_h
 _exptl_crystal_face_index_k
 _exptl_crystal_face_index_l
 _exptl_crystal_face_perp_dist
    1.00    1.00    4.00    0.0290
    1.00   -1.00    0.00    0.0880
   -1.00   -1.00   -4.00    0.0360
   -1.00    1.00    0.00    0.0640
    1.00    1.00    0.00    0.0090
   -1.00   -1.00    0.00    0.0230

_exptl_absorpt_coefficient_mu    1.666

_exptl_absorpt_correction_type   analytical
_exptl_absorpt_correction_T_min  0.7947
_exptl_absorpt_correction_T_max  0.9605
_exptl_absorpt_process_details
;
SADABS (Sheldrick & Bruker AXS, 2004-2008)
;

_exptl_special_details
;
 ?
;
_diffrn_radiation_probe          x-ray
_diffrn_radiation_type           MoK\a
_diffrn_radiation_wavelength     0.71073
_diffrn_source                   'fine-focus sealed tube (Mo)'
_diffrn_radiation_monochromator  graphite
_diffrn_measurement_device_type  'Bruker AXS Smart 1000'
_diffrn_measurement_method       '\f- and \w-scans'
_diffrn_detector_area_resol_mean 8.19
_diffrn_reflns_number            40954
_diffrn_reflns_av_R_equivalents  0.0719
_diffrn_reflns_av_sigmaI/netI    0.0610
_diffrn_reflns_limit_h_min       -15
_diffrn_reflns_limit_h_max       15
_diffrn_reflns_limit_k_min       -15
_diffrn_reflns_limit_k_max       17
_diffrn_reflns_limit_l_min       0
_diffrn_reflns_limit_l_max       18
_diffrn_reflns_theta_min         1.71
_diffrn_reflns_theta_max         26.42
_reflns_number_total             8874
_reflns_number_gt                6432
_reflns_threshold_expression     >2sigma(I)
_computing_data_collection       'SMART-5.631 (Bruker AXS, 2003)'

_computing_cell_refinement
;
SAINT (Bruker AXS, 1997-2008). Includes estimated systematic errors
 of the unit cell constants from Monte Carlo simulations.
;
_computing_data_reduction        'SAINT (Bruker AXS, 1997-2008)'
_computing_structure_solution    'SIR2011 (Giacovazzo et al., 2011)'
_computing_structure_refinement  'SHELXL-97 (Sheldrick, 1997)'
_computing_molecular_graphics    ?
_computing_publication_material  'SHELXL-97 (Sheldrick, 1997)'

_refine_special_details
;
 Refinement of F^2^ against ALL reflections.  The weighted R-factor wR and
 goodness of fit S are based on F^2^, conventional R-factors R are based
 on F, with F set to zero for negative F^2^. The threshold expression of
 F^2^ > 2sigma(F^2^) is used only for calculating R-factors(gt) etc. and is
 not relevant to the choice of reflections for refinement.  R-factors based
 on F^2^ are statistically about twice as large as those based on F, and R-
 factors based on ALL data will be even larger.
;

_refine_ls_structure_factor_coef Fsqd
_refine_ls_matrix_type           full
_refine_ls_weighting_scheme      calc
_refine_ls_weighting_details
'calc w=1/[\s^2^(Fo^2^)+(0.0427P)^2^+5.4856P] where P=(Fo^2^+2Fc^2^)/3'
_atom_sites_solution_primary     dual
_atom_sites_solution_secondary   difmap
_atom_sites_solution_hydrogens   geom

_refine_ls_hydrogen_treatment    constr
_refine_ls_extinction_method     none
_refine_ls_extinction_coef       ?
_refine_ls_number_reflns         8874
_refine_ls_number_parameters     530
_refine_ls_number_restraints     48
_refine_ls_R_factor_all          0.0850
_refine_ls_R_factor_gt           0.0515
_refine_ls_wR_factor_ref         0.1213
_refine_ls_wR_factor_gt          0.1071
_refine_ls_goodness_of_fit_ref   1.017
_refine_ls_restrained_S_all      1.245
_refine_ls_shift/su_max          0.000
_refine_ls_shift/su_mean         0.000

loop_
_atom_site_label
_atom_site_type_symbol
_atom_site_fract_x
_atom_site_fract_y
_atom_site_fract_z
_atom_site_U_iso_or_equiv
_atom_site_adp_type
_atom_site_occupancy
_atom_site_symmetry_multiplicity
_atom_site_calc_flag
_atom_site_refinement_flags
_atom_site_disorder_assembly
_atom_site_disorder_group
Br Br 0.31263(5) 0.59333(5) 0.83236(4) 0.03766(18) Uani 1 1 d . . .
Ni Ni 0.26883(5) 0.74025(5) 0.67461(4) 0.01440(15) Uani 1 1 d . . .
P1 P 0.45218(10) 0.73363(10) 0.64640(8) 0.0140(2) Uani 1 1 d . . .
P2 P 0.08874(10) 0.74383(10) 0.72786(8) 0.0135(2) Uani 1 1 d . . .
N1 N 0.2356(3) 0.8391(3) 0.5334(3) 0.0124(7) Uani 1 1 d . . .
C2 C 0.1383(3) 0.8499(3) 0.4951(3) 0.0110(9) Uani 1 1 d . . .
C3 C 0.0251(4) 0.8646(3) 0.5387(3) 0.0126(9) Uani 1 1 d . . .
C4 C -0.0561(4) 0.8713(3) 0.4859(3) 0.0140(9) Uani 1 1 d . . .
H4 H -0.1321 0.8789 0.5163 0.017 Uiso 1 1 calc R . .
C5 C -0.0321(4) 0.8674(4) 0.3893(3) 0.0157(9) Uani 1 1 d . . .
C6 C 0.0787(4) 0.8581(3) 0.3450(3) 0.0129(9) Uani 1 1 d . . .
H6 H 0.0977 0.8560 0.2799 0.016 Uiso 1 1 calc R . .
C7 C 0.1624(4) 0.8519(3) 0.3963(3) 0.0125(9) Uani 1 1 d . . .
C8 C 0.2804(4) 0.8454(3) 0.3690(3) 0.0115(9) Uani 1 1 d . . .
C9 C 0.3520(4) 0.8432(4) 0.2820(3) 0.0144(9) Uani 1 1 d . . .
H9 H 0.3229 0.8463 0.2269 0.017 Uiso 1 1 calc R . .
C10 C 0.4647(4) 0.8364(4) 0.2759(3) 0.0167(9) Uani 1 1 d . . .
C11 C 0.5017(4) 0.8395(4) 0.3572(3) 0.0146(9) Uani 1 1 d . . .
H11 H 0.5783 0.8388 0.3522 0.018 Uiso 1 1 calc R . .
C12 C 0.4324(4) 0.8433(4) 0.4436(3) 0.0132(9) Uani 1 1 d . . .
C13 C 0.3204(3) 0.8408(3) 0.4527(3) 0.0111(9) Uani 1 1 d . . .
C14 C 0.4745(4) 0.8509(4) 0.5263(3) 0.0136(9) Uani 1 1 d . . .
H14A H 0.4319 0.9234 0.5312 0.016 Uiso 1 1 calc R . .
H14B H 0.5565 0.8459 0.5111 0.016 Uiso 1 1 calc R . .
C15 C -0.0043(4) 0.8706(4) 0.6401(3) 0.0136(9) Uani 1 1 d . . .
H15A H -0.0852 0.8738 0.6634 0.016 Uiso 1 1 calc R . .
H15B H 0.0083 0.9384 0.6357 0.016 Uiso 1 1 calc R . .
C16 C -0.1271(4) 0.8695(4) 0.3402(4) 0.0215(10) Uani 1 1 d . . .
C17 C -0.1663(5) 0.7660(5) 0.4105(4) 0.0334(13) Uani 1 1 d . . .
H17A H -0.1014 0.6981 0.4211 0.050 Uiso 1 1 calc R . .
H17B H -0.2251 0.7636 0.3794 0.050 Uiso 1 1 calc R . .
H17C H -0.1977 0.7698 0.4763 0.050 Uiso 1 1 calc R . .
C18 C -0.2276(4) 0.9770(5) 0.3278(5) 0.0381(15) Uani 1 1 d . . .
H18A H -0.2549 0.9792 0.3946 0.057 Uiso 1 1 calc R . .
H18B H -0.2895 0.9766 0.2988 0.057 Uiso 1 1 calc R . .
H18C H -0.2021 1.0433 0.2821 0.057 Uiso 1 1 calc R . .
C19 C -0.0879(4) 0.8663(5) 0.2359(4) 0.0281(12) Uani 1 1 d . . .
H19A H -0.0614 0.9319 0.1898 0.042 Uiso 1 1 calc R . .
H19B H -0.1517 0.8677 0.2079 0.042 Uiso 1 1 calc R . .
H19C H -0.0255 0.7973 0.2429 0.042 Uiso 1 1 calc R . .
C20 C 0.5516(4) 0.8238(4) 0.1862(4) 0.0235(11) Uani 1 1 d . . .
C21 C 0.6495(4) 0.7154(5) 0.2286(4) 0.0339(13) Uani 1 1 d . . .
H21A H 0.6893 0.7215 0.2741 0.051 Uiso 1 1 calc R . .
H21B H 0.7029 0.7042 0.1720 0.051 Uiso 1 1 calc R . .
H21C H 0.6187 0.6513 0.2668 0.051 Uiso 1 1 calc R . .
C22 C 0.4959(5) 0.8141(6) 0.1107(4) 0.0433(16) Uani 1 1 d . . .
H22A H 0.4699 0.7468 0.1452 0.065 Uiso 1 1 calc R . .
H22B H 0.5515 0.8084 0.0534 0.065 Uiso 1 1 calc R . .
H22C H 0.4307 0.8809 0.0851 0.065 Uiso 1 1 calc R . .
C23 C 0.5980(5) 0.9236(5) 0.1318(4) 0.0383(14) Uani 1 1 d . . .
H23A H 0.5352 0.9928 0.1054 0.057 Uiso 1 1 calc R . .
H23B H 0.6528 0.9149 0.0751 0.057 Uiso 1 1 calc R . .
H23C H 0.6360 0.9280 0.1797 0.057 Uiso 1 1 calc R . .
C24 C 0.5251(4) 0.7397(4) 0.7354(3) 0.0201(10) Uani 1 1 d . . .
C25 C 0.5418(4) 0.8394(5) 0.7190(4) 0.0261(11) Uani 1 1 d . . .
H25 H 0.5105 0.9070 0.6629 0.031 Uiso 1 1 calc R . .
C26 C 0.6039(5) 0.8414(6) 0.7842(5) 0.0382(15) Uani 1 1 d . . .
H26 H 0.6153 0.9099 0.7718 0.046 Uiso 1 1 calc R . .
C27 C 0.6484(5) 0.7447(6) 0.8658(4) 0.0426(17) Uani 1 1 d . . .
H27 H 0.6910 0.7461 0.9098 0.051 Uiso 1 1 calc R . .
C28 C 0.6312(5) 0.6443(6) 0.8845(4) 0.0426(16) Uani 1 1 d . . .
H28 H 0.6612 0.5776 0.9418 0.051 Uiso 1 1 calc R . .
C29 C 0.5699(4) 0.6416(5) 0.8192(4) 0.0306(13) Uani 1 1 d . . .
H29 H 0.5587 0.5729 0.8318 0.037 Uiso 1 1 calc R . .
C30 C 0.5474(4) 0.6127(4) 0.6236(3) 0.0170(10) Uani 1 1 d . . .
C31 C 0.6636(4) 0.6017(4) 0.5997(4) 0.0231(11) Uani 1 1 d . . .
H31 H 0.6935 0.6540 0.6014 0.028 Uiso 1 1 calc R . .
C32 C 0.7355(4) 0.5153(4) 0.5733(4) 0.0300(12) Uani 1 1 d . . .
H32 H 0.8142 0.5095 0.5556 0.036 Uiso 1 1 calc R . .
C33 C 0.6933(5) 0.4376(4) 0.5727(4) 0.0309(12) Uani 1 1 d . . .
H33 H 0.7432 0.3775 0.5558 0.037 Uiso 1 1 calc R . .
C34 C 0.5789(4) 0.4470(4) 0.5965(4) 0.0295(12) Uani 1 1 d . . .
H34 H 0.5499 0.3938 0.5955 0.035 Uiso 1 1 calc R . .
C35 C 0.5057(4) 0.5343(4) 0.6220(4) 0.0240(11) Uani 1 1 d . . .
H35 H 0.4268 0.5404 0.6384 0.029 Uiso 1 1 calc R . .
C36 C 0.0297(4) 0.7448(4) 0.8516(3) 0.0187(10) Uani 1 1 d . . .
C37 C 0.0303(5) 0.6450(4) 0.9384(4) 0.0281(12) Uani 1 1 d . . .
H37 H 0.0654 0.5747 0.9339 0.034 Uiso 1 1 calc R . .
C38 C -0.0202(5) 0.6484(5) 1.0313(4) 0.0367(14) Uani 1 1 d . . .
H38 H -0.0205 0.5802 1.0899 0.044 Uiso 1 1 calc R . .
C39 C -0.0695(6) 0.7491(5) 1.0392(4) 0.0417(15) Uani 1 1 d . . .
H39 H -0.1040 0.7506 1.1030 0.050 Uiso 1 1 calc R . .
C40 C -0.0692(6) 0.8473(5) 0.9553(5) 0.0502(18) Uani 1 1 d . . .
H40 H -0.1027 0.9171 0.9612 0.060 Uiso 1 1 calc R . .
C41 C -0.0200(5) 0.8457(5) 0.8612(4) 0.0350(14) Uani 1 1 d . . .
H41 H -0.0206 0.9145 0.8032 0.042 Uiso 1 1 calc R . .
C42 C 0.0476(4) 0.6345(4) 0.7235(3) 0.0149(9) Uani 1 1 d . . .
C43 C 0.1248(4) 0.5589(4) 0.6865(3) 0.0193(10) Uani 1 1 d . . .
H43 H 0.2021 0.5588 0.6698 0.023 Uiso 1 1 calc R . .
C44 C 0.0898(4) 0.4829(4) 0.6736(4) 0.0249(11) Uani 1 1 d . . .
H44 H 0.1434 0.4312 0.6481 0.030 Uiso 1 1 calc R . .
C45 C -0.0211(5) 0.4823(4) 0.6974(4) 0.0297(12) Uani 1 1 d . . .
H45 H -0.0444 0.4300 0.6887 0.036 Uiso 1 1 calc R . .
C46 C -0.0998(4) 0.5579(5) 0.7343(4) 0.0326(13) Uani 1 1 d . . .
H46 H -0.1771 0.5577 0.7506 0.039 Uiso 1 1 calc R . .
C47 C -0.0658(4) 0.6332(4) 0.7471(4) 0.0253(11) Uani 1 1 d . . .
H47 H -0.1200 0.6849 0.7724 0.030 Uiso 1 1 calc R . .
Cl1A Cl 0.2428(2) 0.6671(2) 1.1763(2) 0.0431(7) Uani 0.642(4) 1 d PDU A 1
Cl1B Cl 0.3161(9) 0.6333(5) 1.1082(7) 0.150(5) Uani 0.358(4) 1 d PDU A 2
Cl2A Cl 0.1822(4) 0.8854(2) 1.0156(3) 0.0747(12) Uani 0.642(4) 1 d PDU A 1
Cl2B Cl 0.1364(6) 0.8471(9) 1.0654(9) 0.135(4) Uani 0.358(4) 1 d PDU A 2
Cl3A Cl 0.3733(3) 0.7062(4) 0.9874(3) 0.0776(14) Uani 0.642(4) 1 d PDU A 1
Cl3B Cl 0.3274(5) 0.8247(5) 0.9274(3) 0.0584(18) Uani 0.358(4) 1 d PDU A 2
C91 C 0.2377(4) 0.7481(4) 1.0339(4) 0.0514(18) Uani 1 1 d D . .
H91 H 0.1864 0.7268 1.0090 0.062 Uiso 1 1 calc R A 1

loop_
_atom_site_aniso_label
_atom_site_aniso_U_11
_atom_site_aniso_U_22
_atom_site_aniso_U_33
_atom_site_aniso_U_23
_atom_site_aniso_U_13
_atom_site_aniso_U_12
Br 0.0236(3) 0.0509(4) 0.0174(3) 0.0093(2) -0.0073(2) -0.0159(3)
Ni 0.0126(3) 0.0178(3) 0.0108(3) -0.0037(2) -0.0009(2) -0.0053(2)
P1 0.0129(6) 0.0169(6) 0.0110(5) -0.0042(5) -0.0022(4) -0.0044(5)
P2 0.0140(6) 0.0147(6) 0.0122(5) -0.0068(5) 0.0014(4) -0.0044(5)
N1 0.0099(18) 0.0151(19) 0.0113(18) -0.0055(15) -0.0008(14) -0.0025(15)
C2 0.011(2) 0.008(2) 0.013(2) -0.0041(17) -0.0021(16) -0.0006(16)
C3 0.015(2) 0.008(2) 0.013(2) -0.0055(17) -0.0010(17) 0.0001(17)
C4 0.009(2) 0.011(2) 0.022(2) -0.0084(19) 0.0002(17) -0.0019(17)
C5 0.017(2) 0.009(2) 0.022(2) -0.0070(19) -0.0071(19) -0.0010(18)
C6 0.015(2) 0.011(2) 0.016(2) -0.0088(18) -0.0023(17) -0.0013(17)
C7 0.011(2) 0.009(2) 0.016(2) -0.0057(18) -0.0030(17) -0.0005(17)
C8 0.012(2) 0.007(2) 0.014(2) -0.0038(17) -0.0018(17) -0.0028(17)
C9 0.017(2) 0.013(2) 0.013(2) -0.0044(18) -0.0034(17) -0.0045(18)
C10 0.017(2) 0.018(2) 0.013(2) -0.0052(19) 0.0020(18) -0.0063(19)
C11 0.010(2) 0.018(2) 0.015(2) -0.0046(19) 0.0008(17) -0.0078(18)
C12 0.015(2) 0.011(2) 0.011(2) -0.0018(17) -0.0027(17) -0.0035(17)
C13 0.012(2) 0.009(2) 0.010(2) -0.0038(17) 0.0001(16) -0.0028(17)
C14 0.010(2) 0.015(2) 0.016(2) -0.0069(18) -0.0009(17) -0.0042(18)
C15 0.012(2) 0.014(2) 0.015(2) -0.0082(18) 0.0016(17) -0.0020(17)
C16 0.015(2) 0.024(3) 0.032(3) -0.018(2) -0.005(2) -0.002(2)
C17 0.029(3) 0.045(3) 0.044(3) -0.025(3) -0.004(2) -0.020(3)
C18 0.020(3) 0.045(4) 0.064(4) -0.042(3) -0.022(3) 0.012(2)
C19 0.026(3) 0.033(3) 0.037(3) -0.023(3) -0.011(2) -0.004(2)
C20 0.019(2) 0.040(3) 0.016(2) -0.017(2) 0.0041(19) -0.010(2)
C21 0.022(3) 0.048(4) 0.033(3) -0.026(3) 0.011(2) -0.008(3)
C22 0.028(3) 0.090(5) 0.028(3) -0.042(3) 0.011(2) -0.020(3)
C23 0.037(3) 0.048(4) 0.027(3) -0.017(3) 0.018(2) -0.021(3)
C24 0.013(2) 0.035(3) 0.015(2) -0.013(2) 0.0010(18) -0.008(2)
C25 0.022(3) 0.035(3) 0.026(3) -0.020(2) -0.004(2) -0.003(2)
C26 0.026(3) 0.060(4) 0.047(4) -0.042(3) -0.004(3) -0.006(3)
C27 0.021(3) 0.091(5) 0.029(3) -0.042(4) -0.002(2) -0.008(3)
C28 0.027(3) 0.073(5) 0.020(3) -0.010(3) -0.007(2) -0.015(3)
C29 0.023(3) 0.048(4) 0.015(2) -0.006(2) -0.002(2) -0.013(2)
C30 0.017(2) 0.014(2) 0.015(2) -0.0017(18) -0.0036(18) -0.0037(19)
C31 0.021(3) 0.015(2) 0.033(3) -0.008(2) -0.005(2) -0.005(2)
C32 0.020(3) 0.024(3) 0.037(3) -0.009(2) 0.000(2) -0.002(2)
C33 0.029(3) 0.016(3) 0.042(3) -0.012(2) -0.005(2) 0.002(2)
C34 0.028(3) 0.018(3) 0.046(3) -0.016(2) -0.005(2) -0.006(2)
C35 0.018(2) 0.021(3) 0.032(3) -0.009(2) -0.004(2) -0.007(2)
C36 0.022(2) 0.024(3) 0.016(2) -0.012(2) 0.0041(19) -0.012(2)
C37 0.043(3) 0.026(3) 0.018(3) -0.010(2) 0.004(2) -0.016(2)
C38 0.060(4) 0.039(3) 0.018(3) -0.012(2) 0.013(3) -0.033(3)
C39 0.063(4) 0.053(4) 0.020(3) -0.023(3) 0.019(3) -0.031(3)
C40 0.079(5) 0.038(4) 0.036(3) -0.028(3) 0.022(3) -0.020(3)
C41 0.055(4) 0.025(3) 0.020(3) -0.011(2) 0.009(2) -0.013(3)
C42 0.017(2) 0.015(2) 0.015(2) -0.0064(19) -0.0012(18) -0.0058(18)
C43 0.019(2) 0.019(3) 0.018(2) -0.008(2) -0.0019(19) -0.003(2)
C44 0.029(3) 0.020(3) 0.028(3) -0.016(2) -0.005(2) -0.001(2)
C45 0.035(3) 0.019(3) 0.040(3) -0.014(2) -0.016(3) -0.004(2)
C46 0.020(3) 0.032(3) 0.051(4) -0.018(3) -0.007(2) -0.008(2)
C47 0.017(2) 0.022(3) 0.039(3) -0.019(2) 0.002(2) -0.003(2)
Cl1A 0.0411(14) 0.0336(13) 0.0464(15) -0.0083(11) -0.0009(11) -0.0151(11)
Cl1B 0.251(12) 0.058(4) 0.137(8) 0.040(5) -0.134(8) -0.075(6)
Cl2A 0.116(3) 0.0223(14) 0.074(2) 0.0018(14) -0.043(2) -0.0150(16)
Cl2B 0.086(5) 0.206(9) 0.204(9) -0.179(8) 0.085(6) -0.076(6)
Cl3A 0.064(2) 0.142(4) 0.071(2) -0.082(3) 0.0345(16) -0.052(2)
Cl3B 0.068(3) 0.100(5) 0.041(3) -0.045(3) 0.030(2) -0.062(3)
C91 0.039(4) 0.053(4) 0.085(5) -0.042(4) -0.001(3) -0.022(3)

_geom_special_details
;
 All esds (except the esd in the dihedral angle between two l.s. planes)
 are estimated using the full covariance matrix.  The cell esds are taken
 into account individually in the estimation of esds in distances, angles
 and torsion angles; correlations between esds in cell parameters are only
 used when they are defined by crystal symmetry.  An approximate (isotropic)
 treatment of cell esds is used for estimating esds involving l.s. planes.
;

loop_
_geom_bond_atom_site_label_1
_geom_bond_atom_site_label_2
_geom_bond_distance
_geom_bond_site_symmetry_2
_geom_bond_publ_flag
Br Ni 2.3142(12) . ?
Ni N1 1.948(4) . ?
Ni P2 2.2161(16) . ?
Ni P1 2.2307(17) . ?
P1 C30 1.814(5) . ?
P1 C24 1.824(5) . ?
P1 C14 1.830(4) . ?
P2 C36 1.814(5) . ?
P2 C42 1.817(5) . ?
P2 C15 1.818(4) . ?
N1 C13 1.403(5) . ?
N1 C2 1.405(5) . ?
C2 C3 1.407(6) . ?
C2 C7 1.412(6) . ?
C3 C4 1.383(6) . ?
C3 C15 1.495(6) . ?
C4 C5 1.414(6) . ?
C4 H4 0.9500 . ?
C5 C6 1.385(6) . ?
C5 C16 1.530(6) . ?
C6 C7 1.398(6) . ?
C6 H6 0.9500 . ?
C7 C8 1.431(6) . ?
C8 C9 1.395(6) . ?
C8 C13 1.413(6) . ?
C9 C10 1.376(6) . ?
C9 H9 0.9500 . ?
C10 C11 1.414(6) . ?
C10 C20 1.546(6) . ?
C11 C12 1.381(6) . ?
C11 H11 0.9500 . ?
C12 C13 1.402(6) . ?
C12 C14 1.505(6) . ?
C14 H14A 0.9900 . ?
C14 H14B 0.9900 . ?
C15 H15A 0.9900 . ?
C15 H15B 0.9900 . ?
C16 C17 1.522(7) . ?
C16 C19 1.524(7) . ?
C16 C18 1.543(7) . ?
C17 H17A 0.9800 . ?
C17 H17B 0.9800 . ?
C17 H17C 0.9800 . ?
C18 H18A 0.9800 . ?
C18 H18B 0.9800 . ?
C18 H18C 0.9800 . ?
C19 H19A 0.9800 . ?
C19 H19B 0.9800 . ?
C19 H19C 0.9800 . ?
C20 C23 1.510(7) . ?
C20 C22 1.532(7) . ?
C20 C21 1.535(7) . ?
C21 H21A 0.9800 . ?
C21 H21B 0.9800 . ?
C21 H21C 0.9800 . ?
C22 H22A 0.9800 . ?
C22 H22B 0.9800 . ?
C22 H22C 0.9800 . ?
C23 H23A 0.9800 . ?
C23 H23B 0.9800 . ?
C23 H23C 0.9800 . ?
C24 C25 1.391(7) . ?
C24 C29 1.395(7) . ?
C25 C26 1.395(7) . ?
C25 H25 0.9500 . ?
C26 C27 1.368(9) . ?
C26 H26 0.9500 . ?
C27 C28 1.391(9) . ?
C27 H27 0.9500 . ?
C28 C29 1.395(7) . ?
C28 H28 0.9500 . ?
C29 H29 0.9500 . ?
C30 C35 1.391(7) . ?
C30 C31 1.395(6) . ?
C31 C32 1.384(7) . ?
C31 H31 0.9500 . ?
C32 C33 1.380(7) . ?
C32 H32 0.9500 . ?
C33 C34 1.377(7) . ?
C33 H33 0.9500 . ?
C34 C35 1.391(7) . ?
C34 H34 0.9500 . ?
C35 H35 0.9500 . ?
C36 C41 1.383(7) . ?
C36 C37 1.395(7) . ?
C37 C38 1.389(7) . ?
C37 H37 0.9500 . ?
C38 C39 1.367(8) . ?
C38 H38 0.9500 . ?
C39 C40 1.365(8) . ?
C39 H39 0.9500 . ?
C40 C41 1.393(7) . ?
C40 H40 0.9500 . ?
C41 H41 0.9500 . ?
C42 C43 1.381(6) . ?
C42 C47 1.398(6) . ?
C43 C44 1.391(7) . ?
C43 H43 0.9500 . ?
C44 C45 1.364(7) . ?
C44 H44 0.9500 . ?
C45 C46 1.387(7) . ?
C45 H45 0.9500 . ?
C46 C47 1.373(7) . ?
C46 H46 0.9500 . ?
C47 H47 0.9500 . ?
Cl1A C91 1.883(6) . ?
Cl1B C91 1.584(6) . ?
Cl2A C91 1.701(5) . ?
Cl2B C91 1.675(7) . ?
Cl3A C91 1.686(5) . ?
Cl3B C91 1.844(6) . ?
C91 H91 1.0000 . ?

loop_
_geom_angle_atom_site_label_1
_geom_angle_atom_site_label_2
_geom_angle_atom_site_label_3
_geom_angle
_geom_angle_site_symmetry_1
_geom_angle_site_symmetry_3
_geom_angle_publ_flag
N1 Ni P2 93.66(11) . . ?
N1 Ni P1 94.34(11) . . ?
P2 Ni P1 170.62(5) . . ?
N1 Ni Br 168.07(11) . . ?
P2 Ni Br 86.16(4) . . ?
P1 Ni Br 87.02(4) . . ?
C30 P1 C24 103.1(2) . . ?
C30 P1 C14 102.1(2) . . ?
C24 P1 C14 103.1(2) . . ?
C30 P1 Ni 114.21(16) . . ?
C24 P1 Ni 122.31(15) . . ?
C14 P1 Ni 109.70(14) . . ?
C36 P2 C42 104.9(2) . . ?
C36 P2 C15 103.3(2) . . ?
C42 P2 C15 101.6(2) . . ?
C36 P2 Ni 120.57(16) . . ?
C42 P2 Ni 114.83(15) . . ?
C15 P2 Ni 109.53(15) . . ?
C13 N1 C2 103.9(3) . . ?
C13 N1 Ni 121.4(3) . . ?
C2 N1 Ni 121.5(3) . . ?
N1 C2 C3 129.2(4) . . ?
N1 C2 C7 111.9(4) . . ?
C3 C2 C7 118.8(4) . . ?
C4 C3 C2 118.2(4) . . ?
C4 C3 C15 121.8(4) . . ?
C2 C3 C15 120.0(4) . . ?
C3 C4 C5 123.5(4) . . ?
C3 C4 H4 118.2 . . ?
C5 C4 H4 118.2 . . ?
C6 C5 C4 117.8(4) . . ?
C6 C5 C16 123.0(4) . . ?
C4 C5 C16 119.2(4) . . ?
C5 C6 C7 120.0(4) . . ?
C5 C6 H6 120.0 . . ?
C7 C6 H6 120.0 . . ?
C6 C7 C2 121.6(4) . . ?
C6 C7 C8 132.4(4) . . ?
C2 C7 C8 106.1(4) . . ?
C9 C8 C13 121.6(4) . . ?
C9 C8 C7 132.4(4) . . ?
C13 C8 C7 106.0(4) . . ?
C10 C9 C8 120.2(4) . . ?
C10 C9 H9 119.9 . . ?
C8 C9 H9 119.9 . . ?
C9 C10 C11 117.5(4) . . ?
C9 C10 C20 123.3(4) . . ?
C11 C10 C20 119.2(4) . . ?
C12 C11 C10 123.5(4) . . ?
C12 C11 H11 118.3 . . ?
C10 C11 H11 118.3 . . ?
C11 C12 C13 118.3(4) . . ?
C11 C12 C14 121.5(4) . . ?
C13 C12 C14 120.2(4) . . ?
C12 C13 N1 129.5(4) . . ?
C12 C13 C8 118.4(4) . . ?
N1 C13 C8 112.0(4) . . ?
C12 C14 P1 107.5(3) . . ?
C12 C14 H14A 110.2 . . ?
P1 C14 H14A 110.2 . . ?
C12 C14 H14B 110.2 . . ?
P1 C14 H14B 110.2 . . ?
H14A C14 H14B 108.5 . . ?
C3 C15 P2 106.4(3) . . ?
C3 C15 H15A 110.5 . . ?
P2 C15 H15A 110.5 . . ?
C3 C15 H15B 110.5 . . ?
P2 C15 H15B 110.5 . . ?
H15A C15 H15B 108.6 . . ?
C17 C16 C19 108.4(4) . . ?
C17 C16 C5 107.8(4) . . ?
C19 C16 C5 112.7(4) . . ?
C17 C16 C18 109.7(4) . . ?
C19 C16 C18 108.5(4) . . ?
C5 C16 C18 109.7(4) . . ?
C16 C17 H17A 109.5 . . ?
C16 C17 H17B 109.5 . . ?
H17A C17 H17B 109.5 . . ?
C16 C17 H17C 109.5 . . ?
H17A C17 H17C 109.5 . . ?
H17B C17 H17C 109.5 . . ?
C16 C18 H18A 109.5 . . ?
C16 C18 H18B 109.5 . . ?
H18A C18 H18B 109.5 . . ?
C16 C18 H18C 109.5 . . ?
H18A C18 H18C 109.5 . . ?
H18B C18 H18C 109.5 . . ?
C16 C19 H19A 109.5 . . ?
C16 C19 H19B 109.5 . . ?
H19A C19 H19B 109.5 . . ?
C16 C19 H19C 109.5 . . ?
H19A C19 H19C 109.5 . . ?
H19B C19 H19C 109.5 . . ?
C23 C20 C22 109.7(5) . . ?
C23 C20 C21 109.7(4) . . ?
C22 C20 C21 108.0(5) . . ?
C23 C20 C10 110.1(4) . . ?
C22 C20 C10 110.6(4) . . ?
C21 C20 C10 108.7(4) . . ?
C20 C21 H21A 109.5 . . ?
C20 C21 H21B 109.5 . . ?
H21A C21 H21B 109.5 . . ?
C20 C21 H21C 109.5 . . ?
H21A C21 H21C 109.5 . . ?
H21B C21 H21C 109.5 . . ?
C20 C22 H22A 109.5 . . ?
C20 C22 H22B 109.5 . . ?
H22A C22 H22B 109.5 . . ?
C20 C22 H22C 109.5 . . ?
H22A C22 H22C 109.5 . . ?
H22B C22 H22C 109.5 . . ?
C20 C23 H23A 109.5 . . ?
C20 C23 H23B 109.5 . . ?
H23A C23 H23B 109.5 . . ?
C20 C23 H23C 109.5 . . ?
H23A C23 H23C 109.5 . . ?
H23B C23 H23C 109.5 . . ?
C25 C24 C29 118.8(4) . . ?
C25 C24 P1 121.4(4) . . ?
C29 C24 P1 119.7(4) . . ?
C24 C25 C26 120.8(5) . . ?
C24 C25 H25 119.6 . . ?
C26 C25 H25 119.6 . . ?
C27 C26 C25 120.0(6) . . ?
C27 C26 H26 120.0 . . ?
C25 C26 H26 120.0 . . ?
C26 C27 C28 120.1(5) . . ?
C26 C27 H27 119.9 . . ?
C28 C27 H27 119.9 . . ?
C27 C28 C29 120.1(6) . . ?
C27 C28 H28 120.0 . . ?
C29 C28 H28 120.0 . . ?
C24 C29 C28 120.1(6) . . ?
C24 C29 H29 120.0 . . ?
C28 C29 H29 120.0 . . ?
C35 C30 C31 118.8(4) . . ?
C35 C30 P1 121.1(4) . . ?
C31 C30 P1 119.9(4) . . ?
C32 C31 C30 120.5(5) . . ?
C32 C31 H31 119.8 . . ?
C30 C31 H31 119.8 . . ?
C33 C32 C31 120.2(5) . . ?
C33 C32 H32 119.9 . . ?
C31 C32 H32 119.9 . . ?
C34 C33 C32 120.0(5) . . ?
C34 C33 H33 120.0 . . ?
C32 C33 H33 120.0 . . ?
C33 C34 C35 120.2(5) . . ?
C33 C34 H34 119.9 . . ?
C35 C34 H34 119.9 . . ?
C34 C35 C30 120.3(5) . . ?
C34 C35 H35 119.9 . . ?
C30 C35 H35 119.9 . . ?
C41 C36 C37 118.5(4) . . ?
C41 C36 P2 120.2(4) . . ?
C37 C36 P2 121.3(4) . . ?
C38 C37 C36 120.1(5) . . ?
C38 C37 H37 119.9 . . ?
C36 C37 H37 119.9 . . ?
C39 C38 C37 120.5(5) . . ?
C39 C38 H38 119.7 . . ?
C37 C38 H38 119.7 . . ?
C40 C39 C38 120.0(5) . . ?
C40 C39 H39 120.0 . . ?
C38 C39 H39 120.0 . . ?
C39 C40 C41 120.3(5) . . ?
C39 C40 H40 119.9 . . ?
C41 C40 H40 119.9 . . ?
C36 C41 C40 120.5(5) . . ?
C36 C41 H41 119.7 . . ?
C40 C41 H41 119.7 . . ?
C43 C42 C47 118.6(4) . . ?
C43 C42 P2 120.6(3) . . ?
C47 C42 P2 120.4(3) . . ?
C42 C43 C44 120.3(4) . . ?
C42 C43 H43 119.8 . . ?
C44 C43 H43 119.8 . . ?
C45 C44 C43 120.4(5) . . ?
C45 C44 H44 119.8 . . ?
C43 C44 H44 119.8 . . ?
C44 C45 C46 120.1(5) . . ?
C44 C45 H45 120.0 . . ?
C46 C45 H45 120.0 . . ?
C47 C46 C45 119.9(5) . . ?
C47 C46 H46 120.1 . . ?
C45 C46 H46 120.1 . . ?
C46 C47 C42 120.8(5) . . ?
C46 C47 H47 119.6 . . ?
C42 C47 H47 119.6 . . ?
Cl1B C91 Cl2B 127.3(6) . . ?
Cl1B C91 Cl3A 64.0(5) . . ?
Cl2B C91 Cl3A 146.9(5) . . ?
Cl1B C91 Cl2A 139.7(5) . . ?
Cl2B C91 Cl2A 31.2(3) . . ?
Cl3A C91 Cl2A 117.7(4) . . ?
Cl1B C91 Cl3B 109.5(5) . . ?
Cl2B C91 Cl3B 105.1(5) . . ?
Cl3A C91 Cl3B 47.8(3) . . ?
Cl2A C91 Cl3B 73.9(3) . . ?
Cl1B C91 Cl1A 44.2(5) . . ?
Cl2B C91 Cl1A 83.4(5) . . ?
Cl3A C91 Cl1A 103.9(3) . . ?
Cl2A C91 Cl1A 104.6(3) . . ?
Cl3B C91 Cl1A 136.2(4) . . ?
Cl1B C91 H91 105.7 . . ?
Cl2B C91 H91 97.0 . . ?
Cl3A C91 H91 110.1 . . ?
Cl2A C91 H91 110.1 . . ?
Cl3B C91 H91 111.3 . . ?
Cl1A C91 H91 110.1 . . ?

loop_
_geom_torsion_atom_site_label_1
_geom_torsion_atom_site_label_2
_geom_torsion_atom_site_label_3
_geom_torsion_atom_site_label_4
_geom_torsion
_geom_torsion_site_symmetry_1
_geom_torsion_site_symmetry_2
_geom_torsion_site_symmetry_3
_geom_torsion_site_symmetry_4
_geom_torsion_publ_flag
N1 Ni P1 C30 -95.65(19) . . . . ?
P2 Ni P1 C30 115.9(3) . . . . ?
Br Ni P1 C30 72.47(16) . . . . ?
N1 Ni P1 C24 139.0(2) . . . . ?
P2 Ni P1 C24 -9.4(4) . . . . ?
Br Ni P1 C24 -52.9(2) . . . . ?
N1 Ni P1 C14 18.21(19) . . . . ?
P2 Ni P1 C14 -130.2(3) . . . . ?
Br Ni P1 C14 -173.67(15) . . . . ?
N1 Ni P2 C36 -142.9(2) . . . . ?
P1 Ni P2 C36 5.5(4) . . . . ?
Br Ni P2 C36 49.01(19) . . . . ?
N1 Ni P2 C42 90.05(19) . . . . ?
P1 Ni P2 C42 -121.5(3) . . . . ?
Br Ni P2 C42 -78.00(16) . . . . ?
N1 Ni P2 C15 -23.46(18) . . . . ?
P1 Ni P2 C15 125.0(3) . . . . ?
Br Ni P2 C15 168.50(15) . . . . ?
P2 Ni N1 C13 -158.0(3) . . . . ?
P1 Ni N1 C13 26.9(3) . . . . ?
Br Ni N1 C13 -69.3(7) . . . . ?
P2 Ni N1 C2 -23.3(3) . . . . ?
P1 Ni N1 C2 161.6(3) . . . . ?
Br Ni N1 C2 65.4(7) . . . . ?
C13 N1 C2 C3 -173.0(4) . . . . ?
Ni N1 C2 C3 45.7(6) . . . . ?
C13 N1 C2 C7 3.2(5) . . . . ?
Ni N1 C2 C7 -138.0(3) . . . . ?
N1 C2 C3 C4 -179.0(4) . . . . ?
C7 C2 C3 C4 5.0(6) . . . . ?
N1 C2 C3 C15 0.1(7) . . . . ?
C7 C2 C3 C15 -175.9(4) . . . . ?
C2 C3 C4 C5 -1.8(6) . . . . ?
C15 C3 C4 C5 179.1(4) . . . . ?
C3 C4 C5 C6 -1.0(6) . . . . ?
C3 C4 C5 C16 176.9(4) . . . . ?
C4 C5 C6 C7 0.6(6) . . . . ?
C16 C5 C6 C7 -177.2(4) . . . . ?
C5 C6 C7 C2 2.7(6) . . . . ?
C5 C6 C7 C8 -177.9(4) . . . . ?
N1 C2 C7 C6 177.7(4) . . . . ?
C3 C2 C7 C6 -5.6(6) . . . . ?
N1 C2 C7 C8 -1.8(5) . . . . ?
C3 C2 C7 C8 174.8(4) . . . . ?
C6 C7 C8 C9 0.0(8) . . . . ?
C2 C7 C8 C9 179.5(4) . . . . ?
C6 C7 C8 C13 -179.9(4) . . . . ?
C2 C7 C8 C13 -0.4(5) . . . . ?
C13 C8 C9 C10 -0.1(6) . . . . ?
C7 C8 C9 C10 -179.9(4) . . . . ?
C8 C9 C10 C11 -4.1(6) . . . . ?
C8 C9 C10 C20 174.9(4) . . . . ?
C9 C10 C11 C12 3.2(7) . . . . ?
C20 C10 C11 C12 -175.8(4) . . . . ?
C10 C11 C12 C13 1.9(7) . . . . ?
C10 C11 C12 C14 -177.7(4) . . . . ?
C11 C12 C13 N1 177.2(4) . . . . ?
C14 C12 C13 N1 -3.2(7) . . . . ?
C11 C12 C13 C8 -6.1(6) . . . . ?
C14 C12 C13 C8 173.6(4) . . . . ?
C2 N1 C13 C12 173.4(4) . . . . ?
Ni N1 C13 C12 -45.2(6) . . . . ?
C2 N1 C13 C8 -3.5(4) . . . . ?
Ni N1 C13 C8 137.8(3) . . . . ?
C9 C8 C13 C12 5.3(6) . . . . ?
C7 C8 C13 C12 -174.8(4) . . . . ?
C9 C8 C13 N1 -177.4(4) . . . . ?
C7 C8 C13 N1 2.5(5) . . . . ?
C11 C12 C14 P1 -124.9(4) . . . . ?
C13 C12 C14 P1 55.5(5) . . . . ?
C30 P1 C14 C12 65.1(3) . . . . ?
C24 P1 C14 C12 171.8(3) . . . . ?
Ni P1 C14 C12 -56.4(3) . . . . ?
C4 C3 C15 P2 124.1(4) . . . . ?
C2 C3 C15 P2 -54.9(5) . . . . ?
C36 P2 C15 C3 -169.5(3) . . . . ?
C42 P2 C15 C3 -61.0(3) . . . . ?
Ni P2 C15 C3 60.8(3) . . . . ?
C6 C5 C16 C17 116.6(5) . . . . ?
C4 C5 C16 C17 -61.2(5) . . . . ?
C6 C5 C16 C19 -2.9(6) . . . . ?
C4 C5 C16 C19 179.3(4) . . . . ?
C6 C5 C16 C18 -124.0(5) . . . . ?
C4 C5 C16 C18 58.2(6) . . . . ?
C9 C10 C20 C23 118.5(5) . . . . ?
C11 C10 C20 C23 -62.6(6) . . . . ?
C9 C10 C20 C22 -2.9(7) . . . . ?
C11 C10 C20 C22 176.0(5) . . . . ?
C9 C10 C20 C21 -121.3(5) . . . . ?
C11 C10 C20 C21 57.6(6) . . . . ?
C30 P1 C24 C25 130.7(4) . . . . ?
C14 P1 C24 C25 24.8(4) . . . . ?
Ni P1 C24 C25 -99.1(4) . . . . ?
C30 P1 C24 C29 -46.3(4) . . . . ?
C14 P1 C24 C29 -152.2(4) . . . . ?
Ni P1 C24 C29 83.9(4) . . . . ?
C29 C24 C25 C26 1.1(7) . . . . ?
P1 C24 C25 C26 -176.0(4) . . . . ?
C24 C25 C26 C27 -0.6(8) . . . . ?
C25 C26 C27 C28 -0.4(8) . . . . ?
C26 C27 C28 C29 0.9(8) . . . . ?
C25 C24 C29 C28 -0.6(7) . . . . ?
P1 C24 C29 C28 176.5(4) . . . . ?
C27 C28 C29 C24 -0.4(8) . . . . ?
C24 P1 C30 C35 136.5(4) . . . . ?
C14 P1 C30 C35 -116.8(4) . . . . ?
Ni P1 C30 C35 1.5(4) . . . . ?
C24 P1 C30 C31 -48.4(4) . . . . ?
C14 P1 C30 C31 58.3(4) . . . . ?
Ni P1 C30 C31 176.6(3) . . . . ?
C35 C30 C31 C32 1.0(7) . . . . ?
P1 C30 C31 C32 -174.3(4) . . . . ?
C30 C31 C32 C33 -1.4(8) . . . . ?
C31 C32 C33 C34 1.2(8) . . . . ?
C32 C33 C34 C35 -0.5(8) . . . . ?
C33 C34 C35 C30 0.0(8) . . . . ?
C31 C30 C35 C34 -0.3(7) . . . . ?
P1 C30 C35 C34 174.9(4) . . . . ?
C42 P2 C36 C41 -139.2(4) . . . . ?
C15 P2 C36 C41 -33.2(5) . . . . ?
Ni P2 C36 C41 89.3(4) . . . . ?
C42 P2 C36 C37 39.0(5) . . . . ?
C15 P2 C36 C37 145.0(4) . . . . ?
Ni P2 C36 C37 -92.4(4) . . . . ?
C41 C36 C37 C38 1.3(8) . . . . ?
P2 C36 C37 C38 -177.0(4) . . . . ?
C36 C37 C38 C39 -0.9(9) . . . . ?
C37 C38 C39 C40 -0.1(10) . . . . ?
C38 C39 C40 C41 0.8(11) . . . . ?
C37 C36 C41 C40 -0.6(9) . . . . ?
P2 C36 C41 C40 177.7(5) . . . . ?
C39 C40 C41 C36 -0.4(10) . . . . ?
C36 P2 C42 C43 -136.4(4) . . . . ?
C15 P2 C42 C43 116.4(4) . . . . ?
Ni P2 C42 C43 -1.7(4) . . . . ?
C36 P2 C42 C47 50.6(4) . . . . ?
C15 P2 C42 C47 -56.7(4) . . . . ?
Ni P2 C42 C47 -174.8(3) . . . . ?
C47 C42 C43 C44 -0.2(7) . . . . ?
P2 C42 C43 C44 -173.4(4) . . . . ?
C42 C43 C44 C45 0.0(7) . . . . ?
C43 C44 C45 C46 0.3(8) . . . . ?
C44 C45 C46 C47 -0.2(8) . . . . ?
C45 C46 C47 C42 0.0(8) . . . . ?
C43 C42 C47 C46 0.3(7) . . . . ?
P2 C42 C47 C46 173.4(4) . . . . ?

_diffrn_measured_fraction_theta_max 0.998
_diffrn_reflns_theta_full        26.37
_diffrn_measured_fraction_theta_full 0.998
_refine_diff_density_max         1.229
_refine_diff_density_min         -1.202
_refine_diff_density_rms         0.096

_diffrn_ambient_environment      'perfluoro polyether oil'
_diffrn_measurement_device       'three-circle diffractometer'
_diffrn_measurement_specimen_support 'polyimid foil'
_diffrn_detector                 'CCD plate'
_diffrn_detector_type            CCD-PXL-KAF2
_refine_ls_abs_structure_details 'Flack H D (1983), Acta Cryst. A39, 876-881'


#==end==


data_complex_10
_audit_creation_method
;
CrysAlisPro, Oxford Diffraction Ltd.,
Version 1.171.35.19 (release 27-10-2011 CrysAlis171 .NET)
(compiled Oct 27 2011,15:02:11)
;
_audit_block_code                ga_ng15
_audit_block_refno               1370
_audit_update_record             'Wed Nov 16 12:06:35 CET 2011'


_chemical_name_systematic        ?
_chemical_name_common            ?
_chemical_formula_moiety         ?
_chemical_formula_sum            'C53 H60 N Ni O P2'
_chemical_properties_physical    air-sensitive
_chemical_melting_point          ?

_exptl_crystal_description       neddle
_exptl_crystal_colour            yellow
_diffrn_ambient_temperature      120.0(2)
_chemical_formula_weight         847.67

loop_
_atom_type_symbol
_atom_type_description
_atom_type_scat_dispersion_real
_atom_type_scat_dispersion_imag
_atom_type_scat_source
C C 0.0181 0.0091 'International Tables Vol C Tables 4.2.6.8 and 6.1.1.4'
H H 0.0000 0.0000 'International Tables Vol C Tables 4.2.6.8 and 6.1.1.4'
N N 0.0311 0.0180 'International Tables Vol C Tables 4.2.6.8 and 6.1.1.4'
Ni Ni -3.0029 0.5091 'International Tables Vol C Tables 4.2.6.8 and 6.1.1.4'
O O 0.0492 0.0322 'International Tables Vol C Tables 4.2.6.8 and 6.1.1.4'
P P 0.2955 0.4335 'International Tables Vol C Tables 4.2.6.8 and 6.1.1.4'

_symmetry_cell_setting           triclinic
_symmetry_space_group_name_H-M   'P -1'
_symmetry_int_tables_number      2
_chemical_absolute_configuration .

loop_
_symmetry_equiv_pos_as_xyz
'x, y, z'
'-x, -y, -z'

_cell_length_a                   13.3657(8)
_cell_length_b                   14.1839(12)
_cell_length_c                   14.3602(11)
_cell_angle_alpha                116.303(8)
_cell_angle_beta                 106.596(6)
_cell_angle_gamma                96.028(6)
_cell_volume                     2252.3(3)
_cell_formula_units_Z            2
_cell_measurement_temperature    120.0(2)
_cell_measurement_reflns_used    23414
_cell_measurement_theta_min      3.5769
_cell_measurement_theta_max      72.4293
_exptl_crystal_size_max          0.2950
_exptl_crystal_size_mid          0.1021
_exptl_crystal_size_min          0.1016
_exptl_crystal_density_meas      ?
_exptl_crystal_density_diffrn    1.250
_exptl_crystal_density_method    'not measured'
_exptl_crystal_F_000             902
_exptl_absorpt_coefficient_mu    1.581
_exptl_absorpt_correction_type   multi-scan
_exptl_absorpt_correction_T_min  0.47332
_exptl_absorpt_correction_T_max  1.00000
_exptl_absorpt_process_details
;
CrysAlisPro, Agilent Technologies,
Version 1.171.35.19 (release 27-10-2011 CrysAlis171 .NET)
(compiled Oct 27 2011,15:02:11)
Empirical absorption correction using spherical harmonics,
 implemented in SCALE3 ABSPACK scaling algorithm.
;

_exptl_special_details
;
 ?
;
_diffrn_radiation_probe          x-ray
_diffrn_radiation_type           'Cu K\a'
_diffrn_radiation_wavelength     1.5418
_diffrn_source                   'Agilent SuperNova (Cu) X-ray Source'
_diffrn_radiation_monochromator  mirror
_diffrn_measurement_device_type  'Agilent SuperNova, Dual, Cu at zero, Eos'
_diffrn_measurement_method       '\w and \p scans'
_diffrn_detector_area_resol_mean 15.9241
_diffrn_reflns_number            60163
_diffrn_reflns_av_R_equivalents  0.0716
_diffrn_reflns_av_sigmaI/netI    0.0914
_diffrn_reflns_limit_h_min       -16
_diffrn_reflns_limit_h_max       14
_diffrn_reflns_limit_k_min       -17
_diffrn_reflns_limit_k_max       17
_diffrn_reflns_limit_l_min       -17
_diffrn_reflns_limit_l_max       17
_diffrn_reflns_theta_min         3.5769
_diffrn_reflns_theta_max         72.4293
_reflns_number_total             8624
_reflns_number_gt                7836
_reflns_threshold_expression     >2sigma(I)
_computing_data_collection
;
CrysAlisPro, Agilent Technologies,
Version 1.171.35.19 (release 27-10-2011 CrysAlis171 .NET)
(compiled Oct 27 2011,15:02:11)
;
_computing_cell_refinement
;
CrysAlisPro, Agilent Technologies,
Version 1.171.35.19 (release 27-10-2011 CrysAlis171 .NET)
(compiled Oct 27 2011,15:02:11)
;
_computing_data_reduction
;
CrysAlisPro, Agilent Technologies,
Version 1.171.35.19 (release 27-10-2011 CrysAlis171 .NET)
(compiled Oct 27 2011,15:02:11)
;
_computing_structure_solution    'SUPERFLIP (Palatinus, 2007-2009)'
_computing_structure_refinement  'SHELXL-97 (Sheldrick, 1997)'
_computing_molecular_graphics    ?
_computing_publication_material  'SHELXL-97 (Sheldrick, 1997)'

_refine_special_details
;
 Refinement of F^2^ against ALL reflections.  The weighted R-factor wR and
 goodness of fit S are based on F^2^, conventional R-factors R are based
 on F, with F set to zero for negative F^2^. The threshold expression of
 F^2^ > 2sigma(F^2^) is used only for calculating R-factors(gt) etc. and is
 not relevant to the choice of reflections for refinement.  R-factors based
 on F^2^ are statistically about twice as large as those based on F, and R-
 factors based on ALL data will be even larger.
 electron density attributed to disordered thf was removed
 from the structure (and the corresponding Fo) with the BYPASS
 procedure (PLATON/SQUEEZE, see _platon_squeeze_).
;

_refine_ls_structure_factor_coef Fsqd
_refine_ls_matrix_type           full
_refine_ls_weighting_scheme      calc
_refine_ls_weighting_details
'calc w=1/[\s^2^(Fo^2^)+(0.1028P)^2^+0.8214P] where P=(Fo^2^+2Fc^2^)/3'
_atom_sites_solution_primary     dual
_atom_sites_solution_secondary   difmap
_atom_sites_solution_hydrogens   geom
_refine_ls_hydrogen_treatment    mixed
_refine_ls_extinction_method     none
_refine_ls_extinction_coef       ?
_refine_ls_number_reflns         8624
_refine_ls_number_parameters     461
_refine_ls_number_restraints     0
_refine_ls_R_factor_all          0.0554
_refine_ls_R_factor_gt           0.0525
_refine_ls_wR_factor_ref         0.1540
_refine_ls_wR_factor_gt          0.1506
_refine_ls_goodness_of_fit_ref   1.079
_refine_ls_restrained_S_all      1.079
_refine_ls_shift/su_max          0.001
_refine_ls_shift/su_mean         0.000

loop_
_atom_site_label
_atom_site_type_symbol
_atom_site_fract_x
_atom_site_fract_y
_atom_site_fract_z
_atom_site_U_iso_or_equiv
_atom_site_adp_type
_atom_site_occupancy
_atom_site_symmetry_multiplicity
_atom_site_calc_flag
_atom_site_refinement_flags
_atom_site_disorder_assembly
_atom_site_disorder_group
Ni Ni 0.81037(3) 0.73600(2) 0.68944(3) 0.02025(12) Uani 1 1 d . . .
H H 0.716(3) 0.652(2) 0.643(3) 0.052(9) Uiso 1 1 d . . .
P1 P 0.79398(4) 0.74080(4) 0.83533(4) 0.01924(13) Uani 1 1 d . . .
P2 P 0.77998(4) 0.70890(4) 0.52385(4) 0.01958(13) Uani 1 1 d . . .
N1 N 0.95429(14) 0.83440(12) 0.76101(13) 0.0197(3) Uani 1 1 d . . .
C2 C 1.01958(16) 0.83823(14) 0.70161(16) 0.0199(4) Uani 1 1 d . . .
C3 C 0.98851(16) 0.82528(14) 0.59352(16) 0.0215(4) Uani 1 1 d . . .
C4 C 1.06789(17) 0.82416(15) 0.54860(16) 0.0232(4) Uani 1 1 d . . .
H4 H 1.0472 0.8139 0.4750 0.028 Uiso 1 1 calc R . .
C5 C 1.17830(17) 0.83759(15) 0.60706(16) 0.0238(4) Uani 1 1 d . . .
C6 C 1.20917(17) 0.85855(15) 0.71615(16) 0.0235(4) Uani 1 1 d . . .
H6 H 1.2833 0.8725 0.7590 0.028 Uiso 1 1 calc R . .
C7 C 1.13056(16) 0.85924(14) 0.76371(15) 0.0205(4) Uani 1 1 d . . .
C8 C 1.13541(16) 0.87235(14) 0.87034(15) 0.0201(4) Uani 1 1 d . . .
C9 C 1.22111(16) 0.89370(14) 0.96636(16) 0.0209(4) Uani 1 1 d . . .
H9 H 1.2933 0.9029 0.9684 0.025 Uiso 1 1 calc R . .
C10 C 1.20048(17) 0.90142(15) 1.05851(16) 0.0218(4) Uani 1 1 d . . .
C11 C 1.09223(17) 0.88872(14) 1.05223(15) 0.0215(4) Uani 1 1 d . . .
H11 H 1.0782 0.8952 1.1158 0.026 Uiso 1 1 calc R . .
C12 C 1.00497(16) 0.86724(14) 0.95856(15) 0.0204(4) Uani 1 1 d . . .
C13 C 1.02706(16) 0.85708(14) 0.86437(15) 0.0193(4) Uani 1 1 d . . .
C14 C 0.89309(16) 0.86128(14) 0.96137(15) 0.0208(4) Uani 1 1 d . . .
H14A H 0.8728 0.9281 0.9665 0.025 Uiso 1 1 calc R . .
H14B H 0.8925 0.8577 1.0285 0.025 Uiso 1 1 calc R . .
C15 C 0.87404(16) 0.81670(15) 0.52937(16) 0.0219(4) Uani 1 1 d . . .
H15A H 0.8660 0.7997 0.4524 0.026 Uiso 1 1 calc R . .
H15B H 0.8571 0.8873 0.5663 0.026 Uiso 1 1 calc R . .
C16 C 1.25885(18) 0.83002(19) 0.54743(18) 0.0299(5) Uani 1 1 d . . .
C17 C 1.2095(2) 0.7292(3) 0.4296(2) 0.0549(8) Uani 1 1 d . . .
H17A H 1.1439 0.7377 0.3853 0.082 Uiso 1 1 calc R . .
H17B H 1.1910 0.6637 0.4353 0.082 Uiso 1 1 calc R . .
H17C H 1.2622 0.7219 0.3930 0.082 Uiso 1 1 calc R . .
C18 C 1.2836(3) 0.9320(3) 0.5389(3) 0.0629(9) Uani 1 1 d . . .
H18A H 1.3171 0.9959 0.6142 0.094 Uiso 1 1 calc R . .
H18B H 1.2162 0.9407 0.4976 0.094 Uiso 1 1 calc R . .
H18C H 1.3336 0.9255 0.4993 0.094 Uiso 1 1 calc R . .
C19 C 1.3645(2) 0.8154(2) 0.6085(2) 0.0403(6) Uani 1 1 d . . .
H19A H 1.3487 0.7516 0.6176 0.060 Uiso 1 1 calc R . .
H19B H 1.4016 0.8807 0.6823 0.060 Uiso 1 1 calc R . .
H19C H 1.4111 0.8045 0.5650 0.060 Uiso 1 1 calc R . .
C20 C 1.29028(17) 0.92542(16) 1.16700(16) 0.0246(4) Uani 1 1 d . . .
C21 C 1.40028(19) 0.9258(2) 1.15526(19) 0.0342(5) Uani 1 1 d . . .
H21A H 1.4203 0.9824 1.1374 0.051 Uiso 1 1 calc R . .
H21B H 1.3960 0.8543 1.0951 0.051 Uiso 1 1 calc R . .
H21C H 1.4551 0.9408 1.2258 0.051 Uiso 1 1 calc R . .
C22 C 1.2997(2) 1.0375(2) 1.26262(19) 0.0402(6) Uani 1 1 d . . .
H22A H 1.2289 1.0399 1.2691 0.060 Uiso 1 1 calc R . .
H22B H 1.3239 1.0946 1.2469 0.060 Uiso 1 1 calc R . .
H22C H 1.3524 1.0497 1.3330 0.060 Uiso 1 1 calc R . .
C23 C 1.2629(2) 0.8376(2) 1.1972(2) 0.0407(6) Uani 1 1 d . . .
H23A H 1.3214 0.8520 1.2653 0.061 Uiso 1 1 calc R . .
H23B H 1.2552 0.7657 1.1356 0.061 Uiso 1 1 calc R . .
H23C H 1.1948 0.8390 1.2101 0.061 Uiso 1 1 calc R . .
C24 C 0.66460(16) 0.74863(15) 0.85241(17) 0.0223(4) Uani 1 1 d . . .
C25 C 0.65605(19) 0.83065(17) 0.94763(19) 0.0302(5) Uani 1 1 d . . .
H25 H 0.7195 0.8841 1.0072 0.036 Uiso 1 1 calc R . .
C26 C 0.5562(2) 0.8348(2) 0.9560(2) 0.0394(6) Uani 1 1 d . . .
H26 H 0.5513 0.8920 1.0207 0.047 Uiso 1 1 calc R . .
C27 C 0.4625(2) 0.7559(2) 0.8707(2) 0.0371(5) Uani 1 1 d . . .
H27 H 0.3941 0.7584 0.8776 0.045 Uiso 1 1 calc R . .
C28 C 0.46970(19) 0.6738(2) 0.7758(2) 0.0358(5) Uani 1 1 d . . .
H28 H 0.4061 0.6196 0.7172 0.043 Uiso 1 1 calc R . .
C29 C 0.56947(18) 0.67082(17) 0.76637(18) 0.0299(5) Uani 1 1 d . . .
H29 H 0.5736 0.6150 0.7004 0.036 Uiso 1 1 calc R . .
C30 C 0.82556(16) 0.62640(14) 0.85271(15) 0.0217(4) Uani 1 1 d . . .
C31 C 0.77485(19) 0.58023(17) 0.90075(18) 0.0281(4) Uani 1 1 d . . .
H31 H 0.7182 0.6060 0.9232 0.034 Uiso 1 1 calc R . .
C32 C 0.8074(2) 0.49609(17) 0.91583(19) 0.0340(5) Uani 1 1 d . . .
H32 H 0.7726 0.4644 0.9484 0.041 Uiso 1 1 calc R . .
C33 C 0.8889(2) 0.45887(17) 0.8841(2) 0.0357(5) Uani 1 1 d . . .
H33 H 0.9111 0.4020 0.8952 0.043 Uiso 1 1 calc R . .
C34 C 0.9395(2) 0.50405(19) 0.8354(2) 0.0386(5) Uani 1 1 d . . .
H34 H 0.9961 0.4780 0.8132 0.046 Uiso 1 1 calc R . .
C35 C 0.90712(19) 0.58712(17) 0.81934(19) 0.0314(5) Uani 1 1 d . . .
H35 H 0.9411 0.6173 0.7852 0.038 Uiso 1 1 calc R . .
C36 C 0.64628(17) 0.70790(15) 0.44476(16) 0.0230(4) Uani 1 1 d . . .
C37 C 0.6307(2) 0.7736(2) 0.3974(2) 0.0389(6) Uani 1 1 d . . .
H37 H 0.6914 0.8240 0.4081 0.047 Uiso 1 1 calc R . .
C38 C 0.5269(2) 0.7670(2) 0.3341(2) 0.0450(6) Uani 1 1 d . . .
H38 H 0.5172 0.8132 0.3024 0.054 Uiso 1 1 calc R . .
C39 C 0.43847(19) 0.69409(19) 0.31713(19) 0.0337(5) Uani 1 1 d . . .
H39 H 0.3679 0.6888 0.2726 0.040 Uiso 1 1 calc R . .
C40 C 0.45218(19) 0.62841(19) 0.3649(2) 0.0362(5) Uani 1 1 d . . .
H40 H 0.3910 0.5782 0.3538 0.043 Uiso 1 1 calc R . .
C41 C 0.55516(19) 0.63575(18) 0.4291(2) 0.0329(5) Uani 1 1 d . . .
H41 H 0.5641 0.5913 0.4630 0.039 Uiso 1 1 calc R . .
C42 C 0.80149(16) 0.58484(15) 0.42686(16) 0.0231(4) Uani 1 1 d . . .
C43 C 0.84561(19) 0.51743(17) 0.46368(18) 0.0299(5) Uani 1 1 d . . .
H43 H 0.8610 0.5344 0.5390 0.036 Uiso 1 1 calc R . .
C44 C 0.8674(2) 0.42496(18) 0.3906(2) 0.0369(5) Uani 1 1 d . . .
H44 H 0.8971 0.3788 0.4160 0.044 Uiso 1 1 calc R . .
C45 C 0.8459(2) 0.40042(17) 0.2814(2) 0.0375(5) Uani 1 1 d . . .
H45 H 0.8619 0.3379 0.2321 0.045 Uiso 1 1 calc R . .
C46 C 0.8014(2) 0.46621(18) 0.2434(2) 0.0371(5) Uani 1 1 d . . .
H46 H 0.7859 0.4484 0.1678 0.045 Uiso 1 1 calc R . .
C47 C 0.7792(2) 0.55852(17) 0.31571(18) 0.0310(5) Uani 1 1 d . . .
H47 H 0.7487 0.6038 0.2895 0.037 Uiso 1 1 calc R . .

loop_
_atom_site_aniso_label
_atom_site_aniso_U_11
_atom_site_aniso_U_22
_atom_site_aniso_U_33
_atom_site_aniso_U_23
_atom_site_aniso_U_13
_atom_site_aniso_U_12
Ni 0.0138(2) 0.02226(19) 0.02102(19) 0.00990(14) 0.00430(14) 0.00128(13)
P1 0.0135(3) 0.0200(2) 0.0220(2) 0.00953(19) 0.00575(19) 0.00272(18)
P2 0.0142(3) 0.0202(2) 0.0211(2) 0.00940(18) 0.00442(18) 0.00280(18)
N1 0.0152(9) 0.0200(7) 0.0212(7) 0.0088(6) 0.0060(6) 0.0028(6)
C2 0.0132(10) 0.0183(8) 0.0244(9) 0.0083(7) 0.0064(7) 0.0026(7)
C3 0.0171(10) 0.0191(8) 0.0235(9) 0.0090(7) 0.0045(7) 0.0023(7)
C4 0.0183(11) 0.0260(9) 0.0235(9) 0.0124(7) 0.0062(8) 0.0028(7)
C5 0.0174(11) 0.0255(9) 0.0277(10) 0.0128(8) 0.0086(8) 0.0041(7)
C6 0.0138(10) 0.0248(9) 0.0271(9) 0.0107(8) 0.0053(8) 0.0031(7)
C7 0.0161(10) 0.0181(8) 0.0218(9) 0.0069(7) 0.0053(7) 0.0033(7)
C8 0.0159(10) 0.0191(8) 0.0231(9) 0.0086(7) 0.0077(7) 0.0042(7)
C9 0.0132(10) 0.0213(8) 0.0256(9) 0.0096(7) 0.0070(7) 0.0046(7)
C10 0.0164(10) 0.0212(8) 0.0225(9) 0.0087(7) 0.0040(7) 0.0045(7)
C11 0.0199(11) 0.0209(8) 0.0211(9) 0.0085(7) 0.0076(8) 0.0044(7)
C12 0.0168(10) 0.0176(8) 0.0230(9) 0.0074(7) 0.0071(7) 0.0032(7)
C13 0.0150(10) 0.0162(8) 0.0215(9) 0.0067(7) 0.0048(7) 0.0023(7)
C14 0.0159(10) 0.0209(8) 0.0219(9) 0.0079(7) 0.0074(7) 0.0022(7)
C15 0.0160(10) 0.0226(8) 0.0242(9) 0.0115(7) 0.0044(7) 0.0032(7)
C16 0.0203(12) 0.0428(12) 0.0301(10) 0.0185(9) 0.0133(9) 0.0085(9)
C17 0.0257(15) 0.086(2) 0.0312(12) 0.0104(13) 0.0117(10) 0.0175(14)
C18 0.063(2) 0.079(2) 0.100(3) 0.066(2) 0.062(2) 0.0324(18)
C19 0.0183(12) 0.0665(16) 0.0357(12) 0.0225(11) 0.0139(10) 0.0128(11)
C20 0.0172(11) 0.0297(10) 0.0243(9) 0.0133(8) 0.0044(8) 0.0066(8)
C21 0.0199(12) 0.0493(13) 0.0305(11) 0.0206(10) 0.0045(9) 0.0088(9)
C22 0.0332(14) 0.0435(13) 0.0252(11) 0.0076(10) -0.0001(9) 0.0147(10)
C23 0.0257(13) 0.0562(14) 0.0489(14) 0.0383(12) 0.0061(10) 0.0094(11)
C24 0.0138(10) 0.0252(9) 0.0319(10) 0.0167(8) 0.0100(8) 0.0046(7)
C25 0.0192(12) 0.0310(10) 0.0362(11) 0.0122(9) 0.0131(9) 0.0033(8)
C26 0.0301(14) 0.0364(11) 0.0488(14) 0.0141(10) 0.0228(11) 0.0079(10)
C27 0.0191(12) 0.0432(12) 0.0535(14) 0.0239(11) 0.0191(10) 0.0104(10)
C28 0.0153(12) 0.0411(12) 0.0438(13) 0.0190(10) 0.0067(9) 0.0023(9)
C29 0.0198(12) 0.0321(10) 0.0317(10) 0.0125(9) 0.0077(9) 0.0043(8)
C30 0.0159(10) 0.0199(8) 0.0221(9) 0.0078(7) 0.0029(7) 0.0014(7)
C31 0.0234(12) 0.0294(10) 0.0324(10) 0.0170(8) 0.0094(9) 0.0060(8)
C32 0.0349(14) 0.0291(10) 0.0339(11) 0.0178(9) 0.0059(10) 0.0021(9)
C33 0.0338(14) 0.0245(10) 0.0384(12) 0.0150(9) 0.0009(10) 0.0066(9)
C34 0.0312(14) 0.0329(11) 0.0515(14) 0.0188(10) 0.0164(11) 0.0153(10)
C35 0.0265(13) 0.0302(10) 0.0397(12) 0.0175(9) 0.0143(9) 0.0097(9)
C36 0.0172(10) 0.0239(9) 0.0238(9) 0.0091(7) 0.0065(8) 0.0056(7)
C37 0.0189(12) 0.0509(13) 0.0561(15) 0.0380(12) 0.0084(10) 0.0065(10)
C38 0.0240(14) 0.0624(16) 0.0639(17) 0.0479(14) 0.0090(12) 0.0135(11)
C39 0.0170(12) 0.0421(12) 0.0362(11) 0.0178(10) 0.0041(9) 0.0104(9)
C40 0.0176(12) 0.0354(11) 0.0467(13) 0.0191(10) 0.0040(10) 0.0017(9)
C41 0.0197(12) 0.0328(10) 0.0446(12) 0.0227(10) 0.0051(9) 0.0038(8)
C42 0.0156(10) 0.0210(8) 0.0269(9) 0.0094(7) 0.0057(8) 0.0016(7)
C43 0.0243(12) 0.0279(10) 0.0317(11) 0.0139(8) 0.0045(9) 0.0057(8)
C44 0.0290(13) 0.0272(10) 0.0494(14) 0.0174(10) 0.0099(10) 0.0094(9)
C45 0.0329(14) 0.0237(10) 0.0466(13) 0.0085(9) 0.0175(11) 0.0072(9)
C46 0.0421(15) 0.0308(11) 0.0333(11) 0.0102(9) 0.0173(10) 0.0082(10)
C47 0.0344(13) 0.0285(10) 0.0300(10) 0.0137(8) 0.0122(9) 0.0107(9)

_geom_special_details
;
 All esds (except the esd in the dihedral angle between two l.s. planes)
 are estimated using the full covariance matrix.  The cell esds are taken
 into account individually in the estimation of esds in distances, angles
 and torsion angles; correlations between esds in cell parameters are only
 used when they are defined by crystal symmetry.  An approximate (isotropic)
 treatment of cell esds is used for estimating esds involving l.s. planes.
;

loop_
_geom_bond_atom_site_label_1
_geom_bond_atom_site_label_2
_geom_bond_distance
_geom_bond_site_symmetry_2
_geom_bond_publ_flag
Ni N1 1.9339(17) . ?
Ni P2 2.1384(6) . ?
Ni P1 2.1403(6) . ?
Ni H 1.40(3) . ?
P1 C30 1.8210(19) . ?
P1 C24 1.822(2) . ?
P1 C14 1.8344(19) . ?
P2 C42 1.812(2) . ?
P2 C36 1.818(2) . ?
P2 C15 1.832(2) . ?
N1 C13 1.392(2) . ?
N1 C2 1.396(3) . ?
C2 C3 1.406(3) . ?
C2 C7 1.414(3) . ?
C3 C4 1.388(3) . ?
C3 C15 1.504(3) . ?
C4 C5 1.418(3) . ?
C4 H4 0.9500 . ?
C5 C6 1.380(3) . ?
C5 C16 1.541(3) . ?
C6 C7 1.406(3) . ?
C6 H6 0.9500 . ?
C7 C8 1.439(3) . ?
C8 C9 1.400(3) . ?
C8 C13 1.414(3) . ?
C9 C10 1.388(3) . ?
C9 H9 0.9500 . ?
C10 C11 1.411(3) . ?
C10 C20 1.536(3) . ?
C11 C12 1.389(3) . ?
C11 H11 0.9500 . ?
C12 C13 1.415(3) . ?
C12 C14 1.502(3) . ?
C14 H14A 0.9900 . ?
C14 H14B 0.9900 . ?
C15 H15A 0.9900 . ?
C15 H15B 0.9900 . ?
C16 C18 1.516(4) . ?
C16 C19 1.523(3) . ?
C16 C17 1.537(3) . ?
C17 H17A 0.9800 . ?
C17 H17B 0.9800 . ?
C17 H17C 0.9800 . ?
C18 H18A 0.9800 . ?
C18 H18B 0.9800 . ?
C18 H18C 0.9800 . ?
C19 H19A 0.9800 . ?
C19 H19B 0.9800 . ?
C19 H19C 0.9800 . ?
C20 C21 1.527(3) . ?
C20 C23 1.532(3) . ?
C20 C22 1.534(3) . ?
C21 H21A 0.9800 . ?
C21 H21B 0.9800 . ?
C21 H21C 0.9800 . ?
C22 H22A 0.9800 . ?
C22 H22B 0.9800 . ?
C22 H22C 0.9800 . ?
C23 H23A 0.9800 . ?
C23 H23B 0.9800 . ?
C23 H23C 0.9800 . ?
C24 C25 1.394(3) . ?
C24 C29 1.400(3) . ?
C25 C26 1.379(3) . ?
C25 H25 0.9500 . ?
C26 C27 1.390(4) . ?
C26 H26 0.9500 . ?
C27 C28 1.384(4) . ?
C27 H27 0.9500 . ?
C28 C29 1.381(3) . ?
C28 H28 0.9500 . ?
C29 H29 0.9500 . ?
C30 C35 1.385(3) . ?
C30 C31 1.392(3) . ?
C31 C32 1.394(3) . ?
C31 H31 0.9500 . ?
C32 C33 1.366(4) . ?
C32 H32 0.9500 . ?
C33 C34 1.389(4) . ?
C33 H33 0.9500 . ?
C34 C35 1.385(3) . ?
C34 H34 0.9500 . ?
C35 H35 0.9500 . ?
C36 C37 1.377(3) . ?
C36 C41 1.400(3) . ?
C37 C38 1.391(3) . ?
C37 H37 0.9500 . ?
C38 C39 1.372(4) . ?
C38 H38 0.9500 . ?
C39 C40 1.380(3) . ?
C39 H39 0.9500 . ?
C40 C41 1.384(3) . ?
C40 H40 0.9500 . ?
C41 H41 0.9500 . ?
C42 C43 1.389(3) . ?
C42 C47 1.397(3) . ?
C43 C44 1.394(3) . ?
C43 H43 0.9500 . ?
C44 C45 1.378(4) . ?
C44 H44 0.9500 . ?
C45 C46 1.381(4) . ?
C45 H45 0.9500 . ?
C46 C47 1.391(3) . ?
C46 H46 0.9500 . ?
C47 H47 0.9500 . ?

loop_
_geom_angle_atom_site_label_1
_geom_angle_atom_site_label_2
_geom_angle_atom_site_label_3
_geom_angle
_geom_angle_site_symmetry_1
_geom_angle_site_symmetry_3
_geom_angle_publ_flag
N1 Ni P2 97.69(5) . . ?
N1 Ni P1 97.89(5) . . ?
P2 Ni P1 164.12(3) . . ?
N1 Ni H 169.4(13) . . ?
P2 Ni H 87.1(13) . . ?
P1 Ni H 78.1(13) . . ?
C30 P1 C24 105.57(9) . . ?
C30 P1 C14 104.07(9) . . ?
C24 P1 C14 104.48(9) . . ?
C30 P1 Ni 113.30(7) . . ?
C24 P1 Ni 118.40(7) . . ?
C14 P1 Ni 109.76(6) . . ?
C42 P2 C36 103.14(9) . . ?
C42 P2 C15 103.14(9) . . ?
C36 P2 C15 104.81(9) . . ?
C42 P2 Ni 116.86(7) . . ?
C36 P2 Ni 117.67(7) . . ?
C15 P2 Ni 109.64(6) . . ?
C13 N1 C2 104.36(16) . . ?
C13 N1 Ni 123.14(13) . . ?
C2 N1 Ni 122.60(12) . . ?
N1 C2 C3 128.59(19) . . ?
N1 C2 C7 112.15(17) . . ?
C3 C2 C7 119.26(18) . . ?
C4 C3 C2 117.91(18) . . ?
C4 C3 C15 120.51(18) . . ?
C2 C3 C15 121.55(18) . . ?
C3 C4 C5 123.27(18) . . ?
C3 C4 H4 118.4 . . ?
C5 C4 H4 118.4 . . ?
C6 C5 C4 118.19(19) . . ?
C6 C5 C16 122.79(19) . . ?
C4 C5 C16 119.01(18) . . ?
C5 C6 C7 119.80(19) . . ?
C5 C6 H6 120.1 . . ?
C7 C6 H6 120.1 . . ?
C6 C7 C2 121.23(18) . . ?
C6 C7 C8 133.14(19) . . ?
C2 C7 C8 105.53(17) . . ?
C9 C8 C13 121.31(18) . . ?
C9 C8 C7 132.91(19) . . ?
C13 C8 C7 105.78(17) . . ?
C10 C9 C8 119.92(19) . . ?
C10 C9 H9 120.0 . . ?
C8 C9 H9 120.0 . . ?
C9 C10 C11 118.07(18) . . ?
C9 C10 C20 122.90(19) . . ?
C11 C10 C20 119.02(17) . . ?
C12 C11 C10 123.79(18) . . ?
C12 C11 H11 118.1 . . ?
C10 C11 H11 118.1 . . ?
C11 C12 C13 117.44(18) . . ?
C11 C12 C14 120.26(17) . . ?
C13 C12 C14 122.22(18) . . ?
N1 C13 C8 112.14(17) . . ?
N1 C13 C12 128.41(18) . . ?
C8 C13 C12 119.44(18) . . ?
C12 C14 P1 110.77(13) . . ?
C12 C14 H14A 109.5 . . ?
P1 C14 H14A 109.5 . . ?
C12 C14 H14B 109.5 . . ?
P1 C14 H14B 109.5 . . ?
H14A C14 H14B 108.1 . . ?
C3 C15 P2 109.67(13) . . ?
C3 C15 H15A 109.7 . . ?
P2 C15 H15A 109.7 . . ?
C3 C15 H15B 109.7 . . ?
P2 C15 H15B 109.7 . . ?
H15A C15 H15B 108.2 . . ?
C18 C16 C19 109.1(2) . . ?
C18 C16 C17 109.7(3) . . ?
C19 C16 C17 106.7(2) . . ?
C18 C16 C5 110.3(2) . . ?
C19 C16 C5 111.72(18) . . ?
C17 C16 C5 109.32(19) . . ?
C16 C17 H17A 109.5 . . ?
C16 C17 H17B 109.5 . . ?
H17A C17 H17B 109.5 . . ?
C16 C17 H17C 109.5 . . ?
H17A C17 H17C 109.5 . . ?
H17B C17 H17C 109.5 . . ?
C16 C18 H18A 109.5 . . ?
C16 C18 H18B 109.5 . . ?
H18A C18 H18B 109.5 . . ?
C16 C18 H18C 109.5 . . ?
H18A C18 H18C 109.5 . . ?
H18B C18 H18C 109.5 . . ?
C16 C19 H19A 109.5 . . ?
C16 C19 H19B 109.5 . . ?
H19A C19 H19B 109.5 . . ?
C16 C19 H19C 109.5 . . ?
H19A C19 H19C 109.5 . . ?
H19B C19 H19C 109.5 . . ?
C21 C20 C23 107.87(18) . . ?
C21 C20 C22 108.38(19) . . ?
C23 C20 C22 109.2(2) . . ?
C21 C20 C10 111.94(17) . . ?
C23 C20 C10 109.67(17) . . ?
C22 C20 C10 109.72(17) . . ?
C20 C21 H21A 109.5 . . ?
C20 C21 H21B 109.5 . . ?
H21A C21 H21B 109.5 . . ?
C20 C21 H21C 109.5 . . ?
H21A C21 H21C 109.5 . . ?
H21B C21 H21C 109.5 . . ?
C20 C22 H22A 109.5 . . ?
C20 C22 H22B 109.5 . . ?
H22A C22 H22B 109.5 . . ?
C20 C22 H22C 109.5 . . ?
H22A C22 H22C 109.5 . . ?
H22B C22 H22C 109.5 . . ?
C20 C23 H23A 109.5 . . ?
C20 C23 H23B 109.5 . . ?
H23A C23 H23B 109.5 . . ?
C20 C23 H23C 109.5 . . ?
H23A C23 H23C 109.5 . . ?
H23B C23 H23C 109.5 . . ?
C25 C24 C29 118.3(2) . . ?
C25 C24 P1 122.48(16) . . ?
C29 C24 P1 119.25(16) . . ?
C26 C25 C24 120.5(2) . . ?
C26 C25 H25 119.7 . . ?
C24 C25 H25 119.7 . . ?
C25 C26 C27 120.6(2) . . ?
C25 C26 H26 119.7 . . ?
C27 C26 H26 119.7 . . ?
C28 C27 C26 119.5(2) . . ?
C28 C27 H27 120.2 . . ?
C26 C27 H27 120.2 . . ?
C29 C28 C27 119.9(2) . . ?
C29 C28 H28 120.1 . . ?
C27 C28 H28 120.1 . . ?
C28 C29 C24 121.1(2) . . ?
C28 C29 H29 119.4 . . ?
C24 C29 H29 119.4 . . ?
C35 C30 C31 119.37(19) . . ?
C35 C30 P1 117.18(15) . . ?
C31 C30 P1 123.41(16) . . ?
C30 C31 C32 119.8(2) . . ?
C30 C31 H31 120.1 . . ?
C32 C31 H31 120.1 . . ?
C33 C32 C31 120.4(2) . . ?
C33 C32 H32 119.8 . . ?
C31 C32 H32 119.8 . . ?
C32 C33 C34 120.1(2) . . ?
C32 C33 H33 119.9 . . ?
C34 C33 H33 119.9 . . ?
C35 C34 C33 119.9(2) . . ?
C35 C34 H34 120.1 . . ?
C33 C34 H34 120.1 . . ?
C30 C35 C34 120.4(2) . . ?
C30 C35 H35 119.8 . . ?
C34 C35 H35 119.8 . . ?
C37 C36 C41 118.4(2) . . ?
C37 C36 P2 122.80(17) . . ?
C41 C36 P2 118.80(16) . . ?
C36 C37 C38 120.6(2) . . ?
C36 C37 H37 119.7 . . ?
C38 C37 H37 119.7 . . ?
C39 C38 C37 120.4(2) . . ?
C39 C38 H38 119.8 . . ?
C37 C38 H38 119.8 . . ?
C38 C39 C40 119.9(2) . . ?
C38 C39 H39 120.1 . . ?
C40 C39 H39 120.1 . . ?
C39 C40 C41 119.9(2) . . ?
C39 C40 H40 120.1 . . ?
C41 C40 H40 120.1 . . ?
C40 C41 C36 120.8(2) . . ?
C40 C41 H41 119.6 . . ?
C36 C41 H41 119.6 . . ?
C43 C42 C47 119.12(19) . . ?
C43 C42 P2 120.22(16) . . ?
C47 C42 P2 120.58(15) . . ?
C42 C43 C44 120.3(2) . . ?
C42 C43 H43 119.8 . . ?
C44 C43 H43 119.8 . . ?
C45 C44 C43 120.0(2) . . ?
C45 C44 H44 120.0 . . ?
C43 C44 H44 120.0 . . ?
C44 C45 C46 120.4(2) . . ?
C44 C45 H45 119.8 . . ?
C46 C45 H45 119.8 . . ?
C45 C46 C47 120.0(2) . . ?
C45 C46 H46 120.0 . . ?
C47 C46 H46 120.0 . . ?
C46 C47 C42 120.2(2) . . ?
C46 C47 H47 119.9 . . ?
C42 C47 H47 119.9 . . ?

loop_
_geom_torsion_atom_site_label_1
_geom_torsion_atom_site_label_2
_geom_torsion_atom_site_label_3
_geom_torsion_atom_site_label_4
_geom_torsion
_geom_torsion_site_symmetry_1
_geom_torsion_site_symmetry_2
_geom_torsion_site_symmetry_3
_geom_torsion_site_symmetry_4
_geom_torsion_publ_flag
N1 Ni P1 C30 -97.45(9) . . . . ?
P2 Ni P1 C30 93.73(11) . . . . ?
N1 Ni P1 C24 138.15(8) . . . . ?
P2 Ni P1 C24 -30.67(12) . . . . ?
N1 Ni P1 C14 18.40(8) . . . . ?
P2 Ni P1 C14 -150.42(10) . . . . ?
N1 Ni P2 C42 98.65(9) . . . . ?
P1 Ni P2 C42 -92.53(11) . . . . ?
N1 Ni P2 C36 -137.75(9) . . . . ?
P1 Ni P2 C36 31.07(12) . . . . ?
N1 Ni P2 C15 -18.18(9) . . . . ?
P1 Ni P2 C15 150.65(10) . . . . ?
P2 Ni N1 C13 -162.24(14) . . . . ?
P1 Ni N1 C13 20.83(15) . . . . ?
P2 Ni N1 C2 -21.95(15) . . . . ?
P1 Ni N1 C2 161.12(14) . . . . ?
C13 N1 C2 C3 -177.47(17) . . . . ?
Ni N1 C2 C3 36.1(3) . . . . ?
C13 N1 C2 C7 1.9(2) . . . . ?
Ni N1 C2 C7 -144.61(13) . . . . ?
N1 C2 C3 C4 -175.11(17) . . . . ?
C7 C2 C3 C4 5.6(3) . . . . ?
N1 C2 C3 C15 7.0(3) . . . . ?
C7 C2 C3 C15 -172.33(16) . . . . ?
C2 C3 C4 C5 -1.3(3) . . . . ?
C15 C3 C4 C5 176.64(17) . . . . ?
C3 C4 C5 C6 -3.5(3) . . . . ?
C3 C4 C5 C16 177.37(18) . . . . ?
C4 C5 C6 C7 4.0(3) . . . . ?
C16 C5 C6 C7 -176.99(18) . . . . ?
C5 C6 C7 C2 0.3(3) . . . . ?
C5 C6 C7 C8 176.29(19) . . . . ?
N1 C2 C7 C6 175.35(16) . . . . ?
C3 C2 C7 C6 -5.3(3) . . . . ?
N1 C2 C7 C8 -1.6(2) . . . . ?
C3 C2 C7 C8 177.80(16) . . . . ?
C6 C7 C8 C9 3.2(4) . . . . ?
C2 C7 C8 C9 179.62(19) . . . . ?
C6 C7 C8 C13 -175.77(19) . . . . ?
C2 C7 C8 C13 0.65(19) . . . . ?
C13 C8 C9 C10 -0.7(3) . . . . ?
C7 C8 C9 C10 -179.56(18) . . . . ?
C8 C9 C10 C11 -0.9(3) . . . . ?
C8 C9 C10 C20 -179.56(17) . . . . ?
C9 C10 C11 C12 1.1(3) . . . . ?
C20 C10 C11 C12 179.80(17) . . . . ?
C10 C11 C12 C13 0.4(3) . . . . ?
C10 C11 C12 C14 -176.49(17) . . . . ?
C2 N1 C13 C8 -1.4(2) . . . . ?
Ni N1 C13 C8 144.82(13) . . . . ?
C2 N1 C13 C12 177.66(17) . . . . ?
Ni N1 C13 C12 -36.1(3) . . . . ?
C9 C8 C13 N1 -178.63(16) . . . . ?
C7 C8 C13 N1 0.5(2) . . . . ?
C9 C8 C13 C12 2.2(3) . . . . ?
C7 C8 C13 C12 -178.69(15) . . . . ?
C11 C12 C13 N1 179.00(17) . . . . ?
C14 C12 C13 N1 -4.2(3) . . . . ?
C11 C12 C13 C8 -2.0(3) . . . . ?
C14 C12 C13 C8 174.84(16) . . . . ?
C11 C12 C14 P1 -133.59(15) . . . . ?
C13 C12 C14 P1 49.7(2) . . . . ?
C30 P1 C14 C12 70.44(15) . . . . ?
C24 P1 C14 C12 -179.05(13) . . . . ?
Ni P1 C14 C12 -51.12(14) . . . . ?
C4 C3 C15 P2 129.08(16) . . . . ?
C2 C3 C15 P2 -53.0(2) . . . . ?
C42 P2 C15 C3 -72.37(15) . . . . ?
C36 P2 C15 C3 179.98(13) . . . . ?
Ni P2 C15 C3 52.79(14) . . . . ?
C6 C5 C16 C18 -105.0(3) . . . . ?
C4 C5 C16 C18 74.0(3) . . . . ?
C6 C5 C16 C19 16.4(3) . . . . ?
C4 C5 C16 C19 -164.5(2) . . . . ?
C6 C5 C16 C17 134.3(2) . . . . ?
C4 C5 C16 C17 -46.7(3) . . . . ?
C9 C10 C20 C21 -6.8(3) . . . . ?
C11 C10 C20 C21 174.51(18) . . . . ?
C9 C10 C20 C23 -126.5(2) . . . . ?
C11 C10 C20 C23 54.8(2) . . . . ?
C9 C10 C20 C22 113.6(2) . . . . ?
C11 C10 C20 C22 -65.1(2) . . . . ?
C30 P1 C24 C25 106.97(18) . . . . ?
C14 P1 C24 C25 -2.5(2) . . . . ?
Ni P1 C24 C25 -124.91(16) . . . . ?
C30 P1 C24 C29 -74.14(18) . . . . ?
C14 P1 C24 C29 176.43(16) . . . . ?
Ni P1 C24 C29 53.98(18) . . . . ?
C29 C24 C25 C26 -0.3(3) . . . . ?
P1 C24 C25 C26 178.63(18) . . . . ?
C24 C25 C26 C27 1.3(4) . . . . ?
C25 C26 C27 C28 -1.1(4) . . . . ?
C26 C27 C28 C29 -0.1(4) . . . . ?
C27 C28 C29 C24 1.2(4) . . . . ?
C25 C24 C29 C28 -1.0(3) . . . . ?
P1 C24 C29 C28 -179.91(17) . . . . ?
C24 P1 C30 C35 165.95(16) . . . . ?
C14 P1 C30 C35 -84.34(17) . . . . ?
Ni P1 C30 C35 34.84(18) . . . . ?
C24 P1 C30 C31 -16.4(2) . . . . ?
C14 P1 C30 C31 93.36(18) . . . . ?
Ni P1 C30 C31 -147.46(16) . . . . ?
C35 C30 C31 C32 0.7(3) . . . . ?
P1 C30 C31 C32 -176.96(16) . . . . ?
C30 C31 C32 C33 0.2(3) . . . . ?
C31 C32 C33 C34 -0.6(3) . . . . ?
C32 C33 C34 C35 0.1(4) . . . . ?
C31 C30 C35 C34 -1.2(3) . . . . ?
P1 C30 C35 C34 176.61(18) . . . . ?
C33 C34 C35 C30 0.8(4) . . . . ?
C42 P2 C36 C37 -104.0(2) . . . . ?
C15 P2 C36 C37 3.6(2) . . . . ?
Ni P2 C36 C37 125.72(19) . . . . ?
C42 P2 C36 C41 74.61(18) . . . . ?
C15 P2 C36 C41 -177.75(17) . . . . ?
Ni P2 C36 C41 -55.66(18) . . . . ?
C41 C36 C37 C38 -1.0(4) . . . . ?
P2 C36 C37 C38 177.6(2) . . . . ?
C36 C37 C38 C39 -0.5(4) . . . . ?
C37 C38 C39 C40 1.3(4) . . . . ?
C38 C39 C40 C41 -0.5(4) . . . . ?
C39 C40 C41 C36 -1.1(4) . . . . ?
C37 C36 C41 C40 1.8(3) . . . . ?
P2 C36 C41 C40 -176.84(19) . . . . ?
C36 P2 C42 C43 -136.72(18) . . . . ?
C15 P2 C42 C43 114.37(18) . . . . ?
Ni P2 C42 C43 -6.0(2) . . . . ?
C36 P2 C42 C47 46.5(2) . . . . ?
C15 P2 C42 C47 -62.37(19) . . . . ?
Ni P2 C42 C47 177.29(15) . . . . ?
C47 C42 C43 C44 0.1(3) . . . . ?
P2 C42 C43 C44 -176.66(18) . . . . ?
C42 C43 C44 C45 0.4(4) . . . . ?
C43 C44 C45 C46 -0.9(4) . . . . ?
C44 C45 C46 C47 0.8(4) . . . . ?
C45 C46 C47 C42 -0.2(4) . . . . ?
C43 C42 C47 C46 -0.3(3) . . . . ?
P2 C42 C47 C46 176.52(19) . . . . ?

_diffrn_measured_fraction_theta_max 0.963
_diffrn_reflns_theta_full        66.97
_diffrn_measured_fraction_theta_full 0.983
_refine_diff_density_max         0.978
_refine_diff_density_min         -0.768
_refine_diff_density_rms         0.079
_audit_creation_date
;
'Tue Nov 15 13:47:51 2011'
;
_cell_oxdiff_length_a            13.3840(6)
_cell_oxdiff_length_b            14.2036(8)
_cell_oxdiff_length_c            14.3503(7)
_cell_oxdiff_angle_alpha         116.251(5)
_cell_oxdiff_angle_beta          106.504(4)
_cell_oxdiff_angle_gamma         96.243(4)
_cell_oxdiff_volume              2257.02(18)
_cell_oxdiff_measurement_reflns_used 23414
loop_
_exptl_crystal_face_index_h
_exptl_crystal_face_index_k
_exptl_crystal_face_index_l
_exptl_crystal_face_perp_dist
_exptl_oxdiff_crystal_face_indexfrac_h
_exptl_oxdiff_crystal_face_indexfrac_k
_exptl_oxdiff_crystal_face_indexfrac_l
_exptl_oxdiff_crystal_face_x
_exptl_oxdiff_crystal_face_y
_exptl_oxdiff_crystal_face_z
-8 2 1 0.0314 -8.0020 2.0076 0.9784 0.0447 -0.1872 0.9164
-2 6 3 0.1166 -2.0005 6.0073 2.9831 0.3537 -0.8768 0.0287
-2 -3 -5 0.1320 -1.9966 -3.0112 -4.9922 -0.0636 0.8874 0.4913
-1 -7 8 0.0510 -1.0130 -6.9742 7.9930 -0.9164 -0.2635 -0.0639
1 7 -8 0.0510 1.0130 6.9742 -7.9930 0.9164 0.2635 0.0639
8 -2 -1 0.0702 8.0020 -2.0076 -0.9784 -0.0447 0.1872 -0.9164
4 -5 -5 0.1346 4.0038 -5.0146 -4.9766 -0.1692 0.9872 -0.2163
_diffrn_orient_matrix_UB_11      0.0101242000
_diffrn_orient_matrix_UB_12      0.0827145000
_diffrn_orient_matrix_UB_13      -0.0411941000
_diffrn_orient_matrix_UB_21      -0.0141380000
_diffrn_orient_matrix_UB_22      -0.0930746000
_diffrn_orient_matrix_UB_23      -0.1159640000
_diffrn_orient_matrix_UB_31      -0.1235581000
_diffrn_orient_matrix_UB_32      -0.0171733000
_diffrn_orient_matrix_UB_33      -0.0386396000
_diffrn_measurement_details
;
#__ type_ start__ end____ width___ exp.time_
  1 omega  -14.00   72.00   1.0000    1.5000
omega____ theta____ kappa____ phi______ frames
    -        0.0000   38.0000  120.0000 86

#__ type_ start__ end____ width___ exp.time_
  2 omega  -16.00   26.00   1.0000    1.5000
omega____ theta____ kappa____ phi______ frames
    -       14.0000   77.0000 -123.0000 42

#__ type_ start__ end____ width___ exp.time_
  3 omega   37.00   82.00   1.0000    1.5000
omega____ theta____ kappa____ phi______ frames
    -       14.0000   77.0000 -123.0000 45

#__ type_ start__ end____ width___ exp.time_
  4 omega  -25.00    1.00   1.0000    3.0000
omega____ theta____ kappa____ phi______ frames
    -      -30.0000  -78.0000   -8.0000 26

#__ type_ start__ end____ width___ exp.time_
  5 omega  -65.00   10.00   1.0000    3.0000
omega____ theta____ kappa____ phi______ frames
    -      -42.5000   77.0000  120.0000 75

#__ type_ start__ end____ width___ exp.time_
  6 omega  -38.00  -12.00   1.0000    3.0000
omega____ theta____ kappa____ phi______ frames
    -      -42.5000  -77.0000  150.0000 26

#__ type_ start__ end____ width___ exp.time_
  7 omega -112.00  -67.00   1.0000    3.0000
omega____ theta____ kappa____ phi______ frames
    -      -42.5000  -77.0000 -150.0000 45

#__ type_ start__ end____ width___ exp.time_
  8 omega  -50.00   29.00   1.0000    3.0000
omega____ theta____ kappa____ phi______ frames
    -      -42.5000   38.0000 -120.0000 79

#__ type_ start__ end____ width___ exp.time_
  9 omega  -41.00  -12.00   1.0000    3.0000
omega____ theta____ kappa____ phi______ frames
    -      -42.5000  -77.0000 -150.0000 29

#__ type_ start__ end____ width___ exp.time_
 10 omega -111.00  -86.00   1.0000    3.0000
omega____ theta____ kappa____ phi______ frames
    -      -42.5000  -77.0000  150.0000 25

#__ type_ start__ end____ width___ exp.time_
 11 omega  -69.00  -42.00   1.0000    3.0000
omega____ theta____ kappa____ phi______ frames
    -      -42.5000  -77.0000  150.0000 27

#__ type_ start__ end____ width___ exp.time_
 12 omega   14.00   39.00   1.0000    3.0000
omega____ theta____ kappa____ phi______ frames
    -       46.0000   80.0000  -92.0000 25

#__ type_ start__ end____ width___ exp.time_
 13 omega   14.00   39.00   1.0000    3.0000
omega____ theta____ kappa____ phi______ frames
    -       46.0000   80.0000   67.0000 25

#__ type_ start__ end____ width___ exp.time_
 14 omega   19.00   44.00   1.0000    3.0000
omega____ theta____ kappa____ phi______ frames
    -       50.0000   79.0000  -66.0000 25

#__ type_ start__ end____ width___ exp.time_
 15 omega   18.00   43.00   1.0000    3.0000
omega____ theta____ kappa____ phi______ frames
    -       50.0000   80.0000    7.0000 25

#__ type_ start__ end____ width___ exp.time_
 16 omega   19.00   44.00   1.0000    3.0000
omega____ theta____ kappa____ phi______ frames
    -       50.0000   79.0000   87.0000 25

#__ type_ start__ end____ width___ exp.time_
 17 omega   20.00   47.00   1.0000    3.0000
omega____ theta____ kappa____ phi______ frames
    -       50.0000   79.0000  158.0000 27

#__ type_ start__ end____ width___ exp.time_
 18 omega   18.00   44.00   1.0000    3.0000
omega____ theta____ kappa____ phi______ frames
    -       50.0000   80.0000 -135.0000 26

#__ type_ start__ end____ width___ exp.time_
 19 omega   19.00   44.00   1.0000    3.0000
omega____ theta____ kappa____ phi______ frames
    -       50.0000   78.0000  -16.0000 25

#__ type_ start__ end____ width___ exp.time_
 20 omega   75.00  122.00   1.0000    3.0000
omega____ theta____ kappa____ phi______ frames
    -       54.0000   76.0000   87.0000 47

#__ type_ start__ end____ width___ exp.time_
 21 omega   89.00  124.00   1.0000    3.0000
omega____ theta____ kappa____ phi______ frames
    -       54.0000   75.0000 -161.0000 35

#__ type_ start__ end____ width___ exp.time_
 22 omega   24.00   86.00   1.0000    3.0000
omega____ theta____ kappa____ phi______ frames
    -       54.0000   77.0000  120.0000 62

#__ type_ start__ end____ width___ exp.time_
 23 omega   24.00  121.00   1.0000    3.0000
omega____ theta____ kappa____ phi______ frames
    -       54.0000   77.0000  -53.0000 97

#__ type_ start__ end____ width___ exp.time_
 24 omega   25.00   52.00   1.0000    3.0000
omega____ theta____ kappa____ phi______ frames
    -       54.0000   76.0000   87.0000 27

#__ type_ start__ end____ width___ exp.time_
 25 omega   25.00   51.00   1.0000    3.0000
omega____ theta____ kappa____ phi______ frames
    -       54.0000   75.0000 -161.0000 26

#__ type_ start__ end____ width___ exp.time_
 26 omega   23.00   48.00   1.0000    3.0000
omega____ theta____ kappa____ phi______ frames
    -       54.0000   78.0000   44.0000 25

#__ type_ start__ end____ width___ exp.time_
 27 omega   99.00  124.00   1.0000    3.0000
omega____ theta____ kappa____ phi______ frames
    -       54.0000   77.0000  120.0000 25

#__ type_ start__ end____ width___ exp.time_
 28 omega   -9.00   75.00   1.0000    3.0000
omega____ theta____ kappa____ phi______ frames
    -       55.1171  -77.0000    0.0000 84

#__ type_ start__ end____ width___ exp.time_
 29 omega   30.00   87.00   1.0000    3.0000
omega____ theta____ kappa____ phi______ frames
    -       58.0000   75.0000  103.0000 57

#__ type_ start__ end____ width___ exp.time_
 30 omega   95.00  126.00   1.0000    3.0000
omega____ theta____ kappa____ phi______ frames
    -       58.0000   75.0000 -131.0000 31

#__ type_ start__ end____ width___ exp.time_
 31 omega   96.00  127.00   1.0000    3.0000
omega____ theta____ kappa____ phi______ frames
    -       58.0000   75.0000  103.0000 31

#__ type_ start__ end____ width___ exp.time_
 32 omega   29.00   57.00   1.0000    3.0000
omega____ theta____ kappa____ phi______ frames
    -       58.0000   75.0000 -131.0000 28

#__ type_ start__ end____ width___ exp.time_
 33 omega   34.00  127.00   1.0000    3.0000
omega____ theta____ kappa____ phi______ frames
    -       58.0000   73.0000   33.0000 93

#__ type_ start__ end____ width___ exp.time_
 34 omega   75.00  102.00   1.0000    3.0000
omega____ theta____ kappa____ phi______ frames
    -       58.0000   75.0000   -7.0000 27

#__ type_ start__ end____ width___ exp.time_
 35 omega   94.00  127.00   1.0000    3.0000
omega____ theta____ kappa____ phi______ frames
    -       58.0000   70.0000 -113.0000 33

#__ type_ start__ end____ width___ exp.time_
 36 omega   43.00   90.00   1.0000    3.0000
omega____ theta____ kappa____ phi______ frames
    -       58.0000   70.0000 -113.0000 47

#__ type_ start__ end____ width___ exp.time_
 37 omega   30.00   66.00   1.0000    3.0000
omega____ theta____ kappa____ phi______ frames
    -       58.0000   75.0000   -7.0000 36

#__ type_ start__ end____ width___ exp.time_
 38 omega    2.00   79.00   1.0000    3.0000
omega____ theta____ kappa____ phi______ frames
    -       70.0000  -80.0000  -99.0000 77

#__ type_ start__ end____ width___ exp.time_
 39 omega   44.00   94.00   1.0000    3.0000
omega____ theta____ kappa____ phi______ frames
    -       78.0000  -79.0000  117.0000 50

#__ type_ start__ end____ width___ exp.time_
 40 omega   74.00  136.00   1.0000    6.0000
omega____ theta____ kappa____ phi______ frames
    -      110.2342  -79.0000  154.0000 62

#__ type_ start__ end____ width___ exp.time_
 41 omega   80.00  107.00   1.0000    6.0000
omega____ theta____ kappa____ phi______ frames
    -      110.2342   77.0000  -60.0000 27

#__ type_ start__ end____ width___ exp.time_
 42 omega   39.00  100.00   1.0000    6.0000
omega____ theta____ kappa____ phi______ frames
    -      110.2342  -80.0000  -42.0000 61

#__ type_ start__ end____ width___ exp.time_
 43 omega   39.00  141.00   1.0000    6.0000
omega____ theta____ kappa____ phi______ frames
    -      110.2342  -80.0000   13.0000 102

#__ type_ start__ end____ width___ exp.time_
 44 omega  125.00  177.00   1.0000    6.0000
omega____ theta____ kappa____ phi______ frames
    -      110.2342   63.0000   30.0000 52

#__ type_ start__ end____ width___ exp.time_
 45 omega   88.00  118.00   1.0000    6.0000
omega____ theta____ kappa____ phi______ frames
    -      110.2342   63.0000   30.0000 30

#__ type_ start__ end____ width___ exp.time_
 46 omega   48.00  138.00   1.0000    6.0000
omega____ theta____ kappa____ phi______ frames
    -      110.2342  -79.0000   64.0000 90

#__ type_ start__ end____ width___ exp.time_
 47 omega   85.00  111.00   1.0000    6.0000
omega____ theta____ kappa____ phi______ frames
    -      110.2342   38.0000   90.0000 26

#__ type_ start__ end____ width___ exp.time_
 48 omega   88.00  170.00   1.0000    6.0000
omega____ theta____ kappa____ phi______ frames
    -      110.2342   63.0000  150.0000 82

#__ type_ start__ end____ width___ exp.time_
 49 omega   85.00  112.00   1.0000    6.0000
omega____ theta____ kappa____ phi______ frames
    -      110.2342   38.0000 -150.0000 27

#__ type_ start__ end____ width___ exp.time_
 50 omega   80.00  178.00   1.0000    6.0000
omega____ theta____ kappa____ phi______ frames
    -      110.2342   77.0000  -30.0000 98

#__ type_ start__ end____ width___ exp.time_
 51 omega  137.00  176.00   1.0000    6.0000
omega____ theta____ kappa____ phi______ frames
    -      110.2342   77.0000  -90.0000 39

#__ type_ start__ end____ width___ exp.time_
 52 omega   80.00  106.00   1.0000    6.0000
omega____ theta____ kappa____ phi______ frames
    -      110.2342   77.0000  -90.0000 26

#__ type_ start__ end____ width___ exp.time_
 53 omega   88.00  175.00   1.0000    6.0000
omega____ theta____ kappa____ phi______ frames
    -      110.2342   63.0000  -60.0000 87

#__ type_ start__ end____ width___ exp.time_
 54 omega   88.00  178.00   1.0000    6.0000
omega____ theta____ kappa____ phi______ frames
    -      110.2342   63.0000 -150.0000 90

#__ type_ start__ end____ width___ exp.time_
 55 omega   80.00  106.00   1.0000    6.0000
omega____ theta____ kappa____ phi______ frames
    -      110.2342   77.0000  150.0000 26

#__ type_ start__ end____ width___ exp.time_
 56 omega  121.00  177.00   1.0000    6.0000
omega____ theta____ kappa____ phi______ frames
    -      110.2342   77.0000    0.0000 56

#__ type_ start__ end____ width___ exp.time_
 57 omega   80.00  107.00   1.0000    6.0000
omega____ theta____ kappa____ phi______ frames
    -      110.2342   77.0000    0.0000 27

#__ type_ start__ end____ width___ exp.time_
 58 omega   85.00  111.00   1.0000    6.0000
omega____ theta____ kappa____ phi______ frames
    -      110.2342   38.0000   30.0000 26

#__ type_ start__ end____ width___ exp.time_
 59 omega   80.00  106.00   1.0000    6.0000
omega____ theta____ kappa____ phi______ frames
    -      110.2342   77.0000  120.0000 26

#__ type_ start__ end____ width___ exp.time_
 60 omega   81.00  106.00   1.0000    6.0000
omega____ theta____ kappa____ phi______ frames
    -      110.2342   77.0000 -120.0000 25

#__ type_ start__ end____ width___ exp.time_
 61 omega   88.00  116.00   1.0000    6.0000
omega____ theta____ kappa____ phi______ frames
    -      110.2342   63.0000  -30.0000 28

#__ type_ start__ end____ width___ exp.time_
 62 omega   80.00  107.00   1.0000    6.0000
omega____ theta____ kappa____ phi______ frames
    -      110.2342   77.0000   30.0000 27

#__ type_ start__ end____ width___ exp.time_
 63 omega  115.00  177.00   1.0000    6.0000
omega____ theta____ kappa____ phi______ frames
    -      110.2342   77.0000   60.0000 62

#__ type_ start__ end____ width___ exp.time_
 64 omega   91.00  118.00   1.0000    6.0000
omega____ theta____ kappa____ phi______ frames
    -      110.2342   50.0000   90.0000 27

#__ type_ start__ end____ width___ exp.time_
 65 omega   80.00  106.00   1.0000    6.0000
omega____ theta____ kappa____ phi______ frames
    -      110.2342   77.0000   60.0000 26

#__ type_ start__ end____ width___ exp.time_
 66 omega   89.00  114.00   1.0000    6.0000
omega____ theta____ kappa____ phi______ frames
    -      110.2342   50.0000 -180.0000 25

#__ type_ start__ end____ width___ exp.time_
 67 omega   81.00  106.00   1.0000    6.0000
omega____ theta____ kappa____ phi______ frames
    -      110.2342   77.0000 -150.0000 25

#__ type_ start__ end____ width___ exp.time_
 68 omega   85.00  148.00   1.0000    6.0000
omega____ theta____ kappa____ phi______ frames
    -      110.2342   38.0000  -60.0000 63

#__ type_ start__ end____ width___ exp.time_
 69 omega   88.00  117.00   1.0000    6.0000
omega____ theta____ kappa____ phi______ frames
    -      110.2342   50.0000  150.0000 29

#__ type_ start__ end____ width___ exp.time_
 70 omega   80.00  178.00   1.0000    6.0000
omega____ theta____ kappa____ phi______ frames
    -      110.2342   77.0000 -180.0000 98

#__ type_ start__ end____ width___ exp.time_
 71 omega   94.00  156.00   1.0000    6.0000
omega____ theta____ kappa____ phi______ frames
    -      110.2342   50.0000   60.0000 62

#__ type_ start__ end____ width___ exp.time_
 72 omega   88.00  172.00   1.0000    6.0000
omega____ theta____ kappa____ phi______ frames
    -      110.2342   63.0000   90.0000 84

#__ type_ start__ end____ width___ exp.time_
 73 omega   80.00  106.00   1.0000    6.0000
omega____ theta____ kappa____ phi______ frames
    -      110.2342   77.0000   90.0000 26

#__ type_ start__ end____ width___ exp.time_
 74 omega   88.00  114.00   1.0000    6.0000
omega____ theta____ kappa____ phi______ frames
    -      110.2342   63.0000  -90.0000 26

#__ type_ start__ end____ width___ exp.time_
 75 omega   93.00  120.00   1.0000    6.0000
omega____ theta____ kappa____ phi______ frames
    -      110.2342   50.0000   30.0000 27

#__ type_ start__ end____ width___ exp.time_
 76 omega   88.00  177.00   1.0000    6.0000
omega____ theta____ kappa____ phi______ frames
    -      110.2342   63.0000 -120.0000 89

#__ type_ start__ end____ width___ exp.time_
 77 omega   89.00  114.00   1.0000    6.0000
omega____ theta____ kappa____ phi______ frames
    -      110.2342   50.0000 -150.0000 25

#__ type_ start__ end____ width___ exp.time_
 78 omega   88.00  178.00   1.0000    6.0000
omega____ theta____ kappa____ phi______ frames
    -      110.2342   63.0000  120.0000 90

#__ type_ start__ end____ width___ exp.time_
 79 omega   72.00  142.00   1.0000    6.0000
omega____ theta____ kappa____ phi______ frames
    -      110.2342  -80.0000 -134.0000 70

#__ type_ start__ end____ width___ exp.time_
 80 omega  -26.00   72.00   1.0000    1.5000
omega____ theta____ kappa____ phi______ frames
    -        0.0000   38.0000  -30.0000 98

#__ type_ start__ end____ width___ exp.time_
 81 phi    120.00  240.00   1.0000    1.5000
omega____ theta____ kappa____ phi______ frames
 -40.0000    0.0000    0.0000     -     120

#__ type_ start__ end____ width___ exp.time_
 82 omega  -30.00   70.00   1.0000    1.5000
omega____ theta____ kappa____ phi______ frames
    -        0.0000   77.0000    0.0000 100

#__ type_ start__ end____ width___ exp.time_
 83 omega  -28.00    1.00   1.0000    3.0000
omega____ theta____ kappa____ phi______ frames
    -      -30.0000  -78.0000   -8.0000 29

#__ type_ start__ end____ width___ exp.time_
 84 omega  -51.00   30.00   1.0000    3.0000
omega____ theta____ kappa____ phi______ frames
    -      -42.5000   25.0000   60.0000 81

#__ type_ start__ end____ width___ exp.time_
 85 omega   14.00   46.00   1.0000    3.0000
omega____ theta____ kappa____ phi______ frames
    -       46.0000   80.0000  164.0000 32

#__ type_ start__ end____ width___ exp.time_
 86 omega   14.00   46.00   1.0000    3.0000
omega____ theta____ kappa____ phi______ frames
    -       46.0000   80.0000   67.0000 32

#__ type_ start__ end____ width___ exp.time_
 87 omega   15.00   49.00   1.0000    3.0000
omega____ theta____ kappa____ phi______ frames
    -       46.0000   78.0000 -108.0000 34

#__ type_ start__ end____ width___ exp.time_
 88 omega   14.00   46.00   1.0000    3.0000
omega____ theta____ kappa____ phi______ frames
    -       46.0000   80.0000  108.0000 32

#__ type_ start__ end____ width___ exp.time_
 89 omega   14.00   46.00   1.0000    3.0000
omega____ theta____ kappa____ phi______ frames
    -       46.0000   80.0000  -43.0000 32

#__ type_ start__ end____ width___ exp.time_
 90 omega   19.00   49.00   1.0000    3.0000
omega____ theta____ kappa____ phi______ frames
    -       50.0000   78.0000  -16.0000 30

#__ type_ start__ end____ width___ exp.time_
 91 omega   19.00   47.00   1.0000    3.0000
omega____ theta____ kappa____ phi______ frames
    -       50.0000   79.0000   87.0000 28

#__ type_ start__ end____ width___ exp.time_
 92 omega   19.00   47.00   1.0000    3.0000
omega____ theta____ kappa____ phi______ frames
    -       50.0000   79.0000  158.0000 28

#__ type_ start__ end____ width___ exp.time_
 93 omega   18.00   46.00   1.0000    3.0000
omega____ theta____ kappa____ phi______ frames
    -       50.0000   80.0000 -135.0000 28

#__ type_ start__ end____ width___ exp.time_
 94 omega   18.00   46.00   1.0000    3.0000
omega____ theta____ kappa____ phi______ frames
    -       50.0000   80.0000  135.0000 28

#__ type_ start__ end____ width___ exp.time_
 95 omega   25.00  124.00   1.0000    3.0000
omega____ theta____ kappa____ phi______ frames
    -       54.0000   76.0000   87.0000 99

#__ type_ start__ end____ width___ exp.time_
 96 omega   24.00  124.00   1.0000    3.0000
omega____ theta____ kappa____ phi______ frames
    -       54.0000   77.0000  120.0000 100

#__ type_ start__ end____ width___ exp.time_
 97 omega   24.00  124.00   1.0000    3.0000
omega____ theta____ kappa____ phi______ frames
    -       54.0000   77.0000  -53.0000 100

#__ type_ start__ end____ width___ exp.time_
 98 omega   23.00   49.00   1.0000    3.0000
omega____ theta____ kappa____ phi______ frames
    -       54.0000   78.0000   44.0000 26

#__ type_ start__ end____ width___ exp.time_
 99 omega   25.00  124.00   1.0000    3.0000
omega____ theta____ kappa____ phi______ frames
    -       54.0000   75.0000 -161.0000 99

#__ type_ start__ end____ width___ exp.time_
100 omega  -15.00   85.00   1.0000    3.0000
omega____ theta____ kappa____ phi______ frames
    -       55.1171  -77.0000 -150.0000 100

#__ type_ start__ end____ width___ exp.time_
101 omega   30.00  128.00   1.0000    3.0000
omega____ theta____ kappa____ phi______ frames
    -       55.1171   38.0000   60.0000 98

#__ type_ start__ end____ width___ exp.time_
102 omega  -15.00   85.00   1.0000    3.0000
omega____ theta____ kappa____ phi______ frames
    -       55.1171  -77.0000  -30.0000 100

#__ type_ start__ end____ width___ exp.time_
103 omega   29.00  128.00   1.0000    3.0000
omega____ theta____ kappa____ phi______ frames
    -       58.0000   75.0000  103.0000 99

#__ type_ start__ end____ width___ exp.time_
104 omega   30.00  127.00   1.0000    3.0000
omega____ theta____ kappa____ phi______ frames
    -       58.0000   73.0000   33.0000 97

#__ type_ start__ end____ width___ exp.time_
105 omega   32.00  127.00   1.0000    3.0000
omega____ theta____ kappa____ phi______ frames
    -       58.0000   70.0000 -113.0000 95

#__ type_ start__ end____ width___ exp.time_
106 omega   29.00  128.00   1.0000    3.0000
omega____ theta____ kappa____ phi______ frames
    -       58.0000   75.0000   -7.0000 99

#__ type_ start__ end____ width___ exp.time_
107 omega   -1.00  102.00   1.0000    3.0000
omega____ theta____ kappa____ phi______ frames
    -       70.0000  -80.0000  -99.0000 103

#__ type_ start__ end____ width___ exp.time_
108 omega    7.00  109.00   1.0000    3.0000
omega____ theta____ kappa____ phi______ frames
    -       78.0000  -79.0000  117.0000 102

#__ type_ start__ end____ width___ exp.time_
109 omega   11.00  114.00   1.0000    3.0000
omega____ theta____ kappa____ phi______ frames
    -       82.0000  -80.0000   91.0000 103

#__ type_ start__ end____ width___ exp.time_
110 omega   37.00   94.00   1.0000    6.0000
omega____ theta____ kappa____ phi______ frames
    -      110.2342  -25.0000 -120.0000 57

#__ type_ start__ end____ width___ exp.time_
111 omega   85.00  178.00   1.0000    6.0000
omega____ theta____ kappa____ phi______ frames
    -      110.2342   38.0000  -90.0000 93

#__ type_ start__ end____ width___ exp.time_
112 omega   88.00  178.00   1.0000    6.0000
omega____ theta____ kappa____ phi______ frames
    -      110.2342   50.0000  120.0000 90

#__ type_ start__ end____ width___ exp.time_
113 omega   39.00  142.00   1.0000    6.0000
omega____ theta____ kappa____ phi______ frames
    -      110.2342  -80.0000 -171.0000 103

#__ type_ start__ end____ width___ exp.time_
114 omega   37.00   94.00   1.0000    6.0000
omega____ theta____ kappa____ phi______ frames
    -      110.2342  -25.0000  150.0000 57

#__ type_ start__ end____ width___ exp.time_
115 omega   37.00   94.00   1.0000    6.0000
omega____ theta____ kappa____ phi______ frames
    -      110.2342  -25.0000   90.0000 57

#__ type_ start__ end____ width___ exp.time_
116 omega   37.00   94.00   1.0000    6.0000
omega____ theta____ kappa____ phi______ frames
    -      110.2342  -25.0000  -30.0000 57

#__ type_ start__ end____ width___ exp.time_
117 omega   85.00  110.00   1.0000    6.0000
omega____ theta____ kappa____ phi______ frames
    -      110.2342   38.0000   60.0000 25

#__ type_ start__ end____ width___ exp.time_
118 omega   37.00   94.00   1.0000    6.0000
omega____ theta____ kappa____ phi______ frames
    -      110.2342  -25.0000   30.0000 57

;
_reflns_odcompleteness_completeness 98.32
_reflns_odcompleteness_theta     66.97
_reflns_odcompleteness_iscentric 1
_diffrn_measurement_device       '\k-geometry diffractometer'
_diffrn_detector                 'CCD plate'
_diffrn_detector_type            'Agilent EOS'
_diffrn_measurement_specimen_support 'polyimid foil'
_refine_ls_abs_structure_details 'Flack H D (1983), Acta Cryst. A39, 876-881'

# SQUEEZE RESULTS (APPEND TO CIF)
# Ref.: P. v. d. Sluis, A. L. Spek, Acta Cryst. 1990, A46, 194.
# Note: Data are Listed for all Voids in the P1 Unit Cell
# i.e. Centre of Gravity, Solvent Accessible Volume,
# Recovered number of Electrons in the Void and
# Details about the Squeezed Material
loop_
  _platon_squeeze_void_nr
  _platon_squeeze_void_average_x
  _platon_squeeze_void_average_y
  _platon_squeeze_void_average_z
  _platon_squeeze_void_volume
  _platon_squeeze_void_count_electrons
  _platon_squeeze_void_content
   1 -0.041 -0.041  0.459       411       130 'thf'
   2  0.372  0.558  0.510        12         0 ' '
   3  0.472  0.986  0.444         6         0 ' '
   4  0.536  0.018  0.572         6         0 ' '
   5  0.627  0.442  0.490        12         0 ' '
_platon_squeeze_details
;
;

#==end==


data_complex_11

_audit_creation_method           SHELXL-97
_audit_block_code                ga_ng9
_audit_block_refno               1251

_chemical_name_systematic        ?
_chemical_name_common            ?
_chemical_formula_moiety         ?
_chemical_formula_sum            'C47 H46 N O P2 Rh'
_chemical_melting_point          ?

_exptl_crystal_description       needle
_exptl_crystal_colour            yellow

_diffrn_ambient_temperature      100(2)
_chemical_formula_weight         805.70

loop_
_atom_type_symbol
_atom_type_description
_atom_type_scat_dispersion_real
_atom_type_scat_dispersion_imag
_atom_type_scat_source
C C 0.0033 0.0016 'International Tables Vol C Tables 4.2.6.8 and 6.1.1.4'
H H 0.0000 0.0000 'International Tables Vol C Tables 4.2.6.8 and 6.1.1.4'
N N 0.0061 0.0033 'International Tables Vol C Tables 4.2.6.8 and 6.1.1.4'
O O 0.0106 0.0060 'International Tables Vol C Tables 4.2.6.8 and 6.1.1.4'
P P 0.1023 0.0942 'International Tables Vol C Tables 4.2.6.8 and 6.1.1.4'
Rh Rh -1.1178 0.9187 'International Tables Vol C Tables 4.2.6.8 and 6.1.1.4'

_symmetry_cell_setting           triclinic
_symmetry_space_group_name_H-M   'P -1'
_symmetry_int_tables_number      2

_chemical_absolute_configuration .

loop_
_symmetry_equiv_pos_as_xyz
'x, y, z'
'-x, -y, -z'

_cell_length_a                   12.603(6)
_cell_length_b                   12.885(5)
_cell_length_c                   14.088(6)
_cell_angle_alpha                109.973(8)
_cell_angle_beta                 112.326(16)
_cell_angle_gamma                92.626(6)
_cell_volume                     1947.9(15)
_cell_formula_units_Z            2
_cell_measurement_temperature    100(2)
_cell_measurement_reflns_used    8185
_cell_measurement_theta_min      2.71
_cell_measurement_theta_max      31.89
_exptl_crystal_size_max          0.13
_exptl_crystal_size_mid          0.10
_exptl_crystal_size_min          0.08
_exptl_crystal_density_meas      ?
_exptl_crystal_density_diffrn    1.374
_exptl_crystal_density_method    'not measured'
_exptl_crystal_F_000             836
_exptl_absorpt_coefficient_mu    0.558

_exptl_absorpt_correction_type   multi-scan
_exptl_absorpt_correction_T_min  0.6840
_exptl_absorpt_correction_T_max  0.7464
_exptl_absorpt_process_details
;
multi-scan from symmetry-related measurements (Blessing 1995)
SADABS (Sheldrick & Bruker AXS, 2004-2008)
;

_exptl_special_details
;
 ?
;
_diffrn_radiation_probe          x-ray
_diffrn_radiation_type           MoK\a
_diffrn_radiation_wavelength     0.71073
_diffrn_source                   'fine-focus sealed tube'
_diffrn_radiation_monochromator  graphite
_diffrn_measurement_device_type  'Bruker AXS Smart 1000'
_diffrn_measurement_method       '\f- and \w-scans'
_diffrn_detector_area_resol_mean 8.19
_diffrn_reflns_number            48824
_diffrn_reflns_av_R_equivalents  0.0401
_diffrn_reflns_av_sigmaI/netI    0.0357
_diffrn_reflns_limit_h_min       -18
_diffrn_reflns_limit_h_max       16
_diffrn_reflns_limit_k_min       -19
_diffrn_reflns_limit_k_max       18
_diffrn_reflns_limit_l_min       0
_diffrn_reflns_limit_l_max       20
_diffrn_reflns_theta_min         1.78
_diffrn_reflns_theta_max         32.22
_reflns_number_total             12744
_reflns_number_gt                10597
_reflns_threshold_expression     >2sigma(I)
_computing_data_collection       'SMART-5.631 (Bruker AXS, 2003)'

_computing_cell_refinement
;
SAINT (Bruker AXS, 1997-2008). Includes estimated systematic errors
 of the unit cell constants from Monte Carlo simulations.
;
_computing_data_reduction        'SAINT (Bruker AXS, 1997-2008); SADABS (Bruker AXS, 2008)'
_computing_structure_solution    'SUPERFLIP (Palatinus, 2007-2009)'
_computing_structure_refinement  'SHELXL-97 (Sheldrick, 1997)'
_computing_molecular_graphics    ?
_computing_publication_material  'SHELXL-97 (Sheldrick, 1997)'

_refine_special_details
;
 Refinement of F^2^ against ALL reflections.  The weighted R-factor wR and
 goodness of fit S are based on F^2^, conventional R-factors R are based
 on F, with F set to zero for negative F^2^. The threshold expression of
 F^2^ > 2sigma(F^2^) is used only for calculating R-factors(gt) etc. and is
 not relevant to the choice of reflections for refinement.  R-factors based
 on F^2^ are statistically about twice as large as those based on F, and R-
 factors based on ALL data will be even larger.
;

_refine_ls_structure_factor_coef Fsqd
_refine_ls_matrix_type           full
_refine_ls_weighting_scheme      calc
_refine_ls_weighting_details
'calc w=1/[\s^2^(Fo^2^)+(0.0332P)^2^+1.5816P] where P=(Fo^2^+2Fc^2^)/3'
_atom_sites_solution_primary     dual
_atom_sites_solution_secondary   difmap
_atom_sites_solution_hydrogens   geom

_refine_ls_hydrogen_treatment    constr
_refine_ls_extinction_method     none
_refine_ls_extinction_coef       ?
_refine_ls_number_reflns         12744
_refine_ls_number_parameters     506
_refine_ls_number_restraints     0
_refine_ls_R_factor_all          0.0458
_refine_ls_R_factor_gt           0.0333
_refine_ls_wR_factor_ref         0.0810
_refine_ls_wR_factor_gt          0.0745
_refine_ls_goodness_of_fit_ref   1.028
_refine_ls_restrained_S_all      1.028
_refine_ls_shift/su_max          0.001
_refine_ls_shift/su_mean         0.000

loop_
_atom_site_label
_atom_site_type_symbol
_atom_site_fract_x
_atom_site_fract_y
_atom_site_fract_z
_atom_site_U_iso_or_equiv
_atom_site_adp_type
_atom_site_occupancy
_atom_site_symmetry_multiplicity
_atom_site_calc_flag
_atom_site_refinement_flags
_atom_site_disorder_assembly
_atom_site_disorder_group
Rh Rh 0.339297(11) 0.205393(10) 0.253643(10) 0.01215(4) Uani 1 1 d . . .
P1 P 0.51497(4) 0.15831(3) 0.25792(3) 0.01184(7) Uani 1 1 d . . .
P2 P 0.16681(4) 0.25806(3) 0.25334(3) 0.01144(7) Uani 1 1 d . . .
O O 0.46468(13) 0.44396(12) 0.38079(14) 0.0342(3) Uani 1 1 d . . .
N1 N 0.25145(12) 0.03483(11) 0.16127(11) 0.0127(2) Uani 1 1 d . . .
C2 C 0.13996(13) -0.00640(12) 0.14911(12) 0.0113(3) Uani 1 1 d . . .
C3 C 0.04238(14) 0.04541(13) 0.13725(12) 0.0124(3) Uani 1 1 d . . .
C4 C -0.05742(14) -0.01241(13) 0.13067(13) 0.0139(3) Uani 1 1 d . . .
H4 H -0.1224 0.0235 0.1252 0.017 Uiso 1 1 calc R . .
C5 C -0.06810(14) -0.12151(13) 0.13168(13) 0.0126(3) Uani 1 1 d . . .
C6 C 0.02613(14) -0.17443(13) 0.13680(13) 0.0132(3) Uani 1 1 d . . .
H6 H 0.0209 -0.2492 0.1344 0.016 Uiso 1 1 calc R . .
C7 C 0.12905(13) -0.11749(13) 0.14554(12) 0.0117(3) Uani 1 1 d . . .
C8 C 0.23848(14) -0.14967(13) 0.15333(13) 0.0123(3) Uani 1 1 d . . .
C9 C 0.28099(14) -0.24682(13) 0.15861(14) 0.0150(3) Uani 1 1 d . . .
H9 H 0.2324 -0.3079 0.1550 0.018 Uiso 1 1 calc R . .
C10 C 0.39411(15) -0.25411(14) 0.16913(14) 0.0158(3) Uani 1 1 d . A .
C11 C 0.45979(14) -0.16369(13) 0.16728(14) 0.0147(3) Uani 1 1 d . . .
H11 H 0.5362 -0.1692 0.1713 0.018 Uiso 1 1 calc R . .
C12 C 0.41888(14) -0.06675(13) 0.15983(13) 0.0131(3) Uani 1 1 d . . .
C13 C 0.30865(14) -0.05599(13) 0.15993(13) 0.0121(3) Uani 1 1 d . . .
C14 C 0.49004(14) 0.02105(13) 0.14800(13) 0.0135(3) Uani 1 1 d . . .
H14A H 0.4480 0.0248 0.0743 0.016 Uiso 1 1 calc R . .
H14B H 0.5661 0.0003 0.1530 0.016 Uiso 1 1 calc R . .
C15 C 0.04348(14) 0.15885(13) 0.13027(13) 0.0138(3) Uani 1 1 d . . .
H15A H -0.0307 0.1832 0.1273 0.017 Uiso 1 1 calc R . .
H15B H 0.0517 0.1554 0.0621 0.017 Uiso 1 1 calc R . .
C16 C -0.17876(14) -0.17453(14) 0.13211(14) 0.0149(3) Uani 1 1 d . . .
C17 C -0.18391(17) -0.10301(16) 0.24199(15) 0.0226(4) Uani 1 1 d . . .
H17A H -0.1138 -0.1021 0.3047 0.034 Uiso 1 1 calc R . .
H17B H -0.2538 -0.1355 0.2451 0.034 Uiso 1 1 calc R . .
H17C H -0.1875 -0.0258 0.2463 0.034 Uiso 1 1 calc R . .
C18 C -0.28859(16) -0.17564(18) 0.03373(16) 0.0255(4) Uani 1 1 d . . .
H18A H -0.2926 -0.0982 0.0389 0.038 Uiso 1 1 calc R . .
H18B H -0.3585 -0.2092 0.0360 0.038 Uiso 1 1 calc R . .
H18C H -0.2846 -0.2202 -0.0364 0.038 Uiso 1 1 calc R . .
C19 C -0.17805(16) -0.29558(15) 0.12489(17) 0.0235(4) Uani 1 1 d . . .
H19A H -0.1724 -0.3416 0.0561 0.035 Uiso 1 1 calc R . .
H19B H -0.2506 -0.3265 0.1248 0.035 Uiso 1 1 calc R . .
H19C H -0.1108 -0.2962 0.1891 0.035 Uiso 1 1 calc R . .
C20 C 0.44790(16) -0.35417(15) 0.18643(18) 0.0229(4) Uani 1 1 d . . .
C21A C 0.4914(3) -0.3279(3) 0.3185(3) 0.0308(8) Uani 0.625(5) 1 d P A 1
H21A H 0.5462 -0.2551 0.3626 0.046 Uiso 0.625(5) 1 calc PR A 1
H21B H 0.5306 -0.3874 0.3356 0.046 Uiso 0.625(5) 1 calc PR A 1
H21C H 0.4236 -0.3255 0.3367 0.046 Uiso 0.625(5) 1 calc PR A 1
C21B C 0.5475(6) -0.3229(5) 0.2849(6) 0.0372(18) Uani 0.375(5) 1 d P A 2
H21D H 0.6044 -0.2657 0.2883 0.056 Uiso 0.375(5) 1 calc PR A 2
H21E H 0.5818 -0.3890 0.2881 0.056 Uiso 0.375(5) 1 calc PR A 2
H21F H 0.5270 -0.2918 0.3480 0.056 Uiso 0.375(5) 1 calc PR A 2
C22A C 0.3632(4) -0.4611(4) 0.1251(5) 0.0311(10) Uani 0.625(5) 1 d P A 1
H22A H 0.2994 -0.4558 0.1491 0.047 Uiso 0.625(5) 1 calc PR A 1
H22B H 0.4021 -0.5216 0.1400 0.047 Uiso 0.625(5) 1 calc PR A 1
H22C H 0.3313 -0.4776 0.0452 0.047 Uiso 0.625(5) 1 calc PR A 1
C22B C 0.3521(8) -0.4536(7) 0.1646(8) 0.0293(17) Uani 0.375(5) 1 d P A 2
H22D H 0.3223 -0.4296 0.2219 0.044 Uiso 0.375(5) 1 calc PR A 2
H22E H 0.3872 -0.5195 0.1671 0.044 Uiso 0.375(5) 1 calc PR A 2
H22F H 0.2875 -0.4733 0.0911 0.044 Uiso 0.375(5) 1 calc PR A 2
C23A C 0.5585(3) -0.3617(3) 0.1687(4) 0.0322(9) Uani 0.625(5) 1 d P A 1
H23A H 0.5416 -0.3700 0.0923 0.048 Uiso 0.625(5) 1 calc PR A 1
H23B H 0.5883 -0.4271 0.1810 0.048 Uiso 0.625(5) 1 calc PR A 1
H23C H 0.6176 -0.2929 0.2212 0.048 Uiso 0.625(5) 1 calc PR A 1
C23B C 0.4786(6) -0.4129(5) 0.0780(6) 0.0339(17) Uani 0.375(5) 1 d P A 2
H23D H 0.4057 -0.4435 0.0098 0.051 Uiso 0.375(5) 1 calc PR A 2
H23E H 0.5199 -0.4739 0.0870 0.051 Uiso 0.375(5) 1 calc PR A 2
H23F H 0.5283 -0.3560 0.0731 0.051 Uiso 0.375(5) 1 calc PR A 2
C24 C 0.61479(14) 0.25175(13) 0.24212(13) 0.0149(3) Uani 1 1 d . . .
C25 C 0.62855(16) 0.22655(15) 0.14379(15) 0.0213(3) Uani 1 1 d . . .
H25 H 0.5859 0.1578 0.0822 0.026 Uiso 1 1 calc R . .
C26 C 0.70432(18) 0.30116(17) 0.13468(17) 0.0272(4) Uani 1 1 d . . .
H26 H 0.7138 0.2825 0.0674 0.033 Uiso 1 1 calc R . .
C27 C 0.76591(18) 0.40241(17) 0.22344(17) 0.0269(4) Uani 1 1 d . . .
H27 H 0.8168 0.4536 0.2169 0.032 Uiso 1 1 calc R . .
C28 C 0.75281(16) 0.42855(15) 0.32190(16) 0.0240(4) Uani 1 1 d . . .
H28 H 0.7950 0.4977 0.3830 0.029 Uiso 1 1 calc R . .
C29 C 0.67821(15) 0.35379(14) 0.33141(14) 0.0185(3) Uani 1 1 d . . .
H29 H 0.6701 0.3721 0.3993 0.022 Uiso 1 1 calc R . .
C30 C 0.60725(14) 0.13681(13) 0.38235(13) 0.0148(3) Uani 1 1 d . . .
C31 C 0.72114(15) 0.12010(14) 0.40155(14) 0.0178(3) Uani 1 1 d . . .
H31 H 0.7542 0.1273 0.3531 0.021 Uiso 1 1 calc R . .
C32 C 0.78626(17) 0.09296(15) 0.49114(15) 0.0223(3) Uani 1 1 d . . .
H32 H 0.8632 0.0805 0.5031 0.027 Uiso 1 1 calc R . .
C33 C 0.73911(17) 0.08400(15) 0.56334(15) 0.0241(4) Uani 1 1 d . . .
H33 H 0.7837 0.0652 0.6244 0.029 Uiso 1 1 calc R . .
C34 C 0.62732(17) 0.10250(17) 0.54622(16) 0.0252(4) Uani 1 1 d . . .
H34 H 0.5956 0.0974 0.5962 0.030 Uiso 1 1 calc R . .
C35 C 0.56115(16) 0.12855(16) 0.45571(15) 0.0216(3) Uani 1 1 d . . .
H35 H 0.4842 0.1408 0.4440 0.026 Uiso 1 1 calc R . .
C36 C 0.14449(14) 0.39690(13) 0.25356(13) 0.0140(3) Uani 1 1 d . . .
C37 C 0.06521(15) 0.41142(14) 0.16044(14) 0.0171(3) Uani 1 1 d . . .
H37 H 0.0231 0.3480 0.0927 0.021 Uiso 1 1 calc R . .
C38 C 0.04800(17) 0.51959(14) 0.16717(15) 0.0206(3) Uani 1 1 d . . .
H38 H -0.0063 0.5296 0.1040 0.025 Uiso 1 1 calc R . .
C39 C 0.10995(16) 0.61247(14) 0.26585(15) 0.0193(3) Uani 1 1 d . . .
H39 H 0.0974 0.6858 0.2703 0.023 Uiso 1 1 calc R . .
C40 C 0.19000(16) 0.59808(14) 0.35774(14) 0.0191(3) Uani 1 1 d . . .
H40 H 0.2334 0.6618 0.4248 0.023 Uiso 1 1 calc R . .
C41 C 0.20690(16) 0.49091(14) 0.35204(14) 0.0182(3) Uani 1 1 d . . .
H41 H 0.2613 0.4814 0.4156 0.022 Uiso 1 1 calc R . .
C42 C 0.13112(14) 0.25686(13) 0.36699(13) 0.0144(3) Uani 1 1 d . . .
C43 C 0.19535(16) 0.20668(16) 0.43767(15) 0.0213(3) Uani 1 1 d . . .
H43 H 0.2596 0.1759 0.4286 0.026 Uiso 1 1 calc R . .
C44 C 0.16513(19) 0.20177(19) 0.52157(17) 0.0290(4) Uani 1 1 d . . .
H44 H 0.2086 0.1670 0.5694 0.035 Uiso 1 1 calc R . .
C45 C 0.07243(18) 0.24709(18) 0.53578(16) 0.0279(4) Uani 1 1 d . . .
H45 H 0.0532 0.2445 0.5940 0.034 Uiso 1 1 calc R . .
C46 C 0.00716(18) 0.29648(17) 0.46507(16) 0.0254(4) Uani 1 1 d . . .
H46 H -0.0571 0.3270 0.4743 0.030 Uiso 1 1 calc R . .
C47 C 0.03655(16) 0.30103(15) 0.38060(15) 0.0199(3) Uani 1 1 d . . .
H47 H -0.0081 0.3344 0.3319 0.024 Uiso 1 1 calc R . .
C48 C 0.41553(16) 0.35194(15) 0.33285(16) 0.0204(3) Uani 1 1 d . . .

loop_
_atom_site_aniso_label
_atom_site_aniso_U_11
_atom_site_aniso_U_22
_atom_site_aniso_U_33
_atom_site_aniso_U_23
_atom_site_aniso_U_13
_atom_site_aniso_U_12
Rh 0.01336(6) 0.00987(6) 0.01144(6) 0.00312(4) 0.00440(4) 0.00158(4)
P1 0.01249(18) 0.01094(17) 0.01024(17) 0.00310(14) 0.00400(14) 0.00069(13)
P2 0.01372(18) 0.00987(16) 0.01008(17) 0.00384(13) 0.00426(14) 0.00338(13)
O 0.0306(8) 0.0151(6) 0.0455(9) -0.0004(6) 0.0160(7) -0.0021(5)
N1 0.0124(6) 0.0116(6) 0.0126(6) 0.0041(5) 0.0043(5) 0.0023(5)
C2 0.0124(7) 0.0107(6) 0.0093(6) 0.0035(5) 0.0034(5) 0.0017(5)
C3 0.0139(7) 0.0113(6) 0.0103(6) 0.0041(5) 0.0033(5) 0.0036(5)
C4 0.0138(7) 0.0143(7) 0.0126(7) 0.0047(6) 0.0047(6) 0.0045(5)
C5 0.0128(7) 0.0139(7) 0.0116(7) 0.0053(5) 0.0051(6) 0.0031(5)
C6 0.0146(7) 0.0125(7) 0.0126(7) 0.0053(5) 0.0054(6) 0.0035(5)
C7 0.0132(7) 0.0116(6) 0.0108(6) 0.0050(5) 0.0049(5) 0.0035(5)
C8 0.0134(7) 0.0119(6) 0.0124(7) 0.0050(5) 0.0059(6) 0.0030(5)
C9 0.0164(7) 0.0140(7) 0.0180(7) 0.0079(6) 0.0090(6) 0.0043(6)
C10 0.0187(8) 0.0137(7) 0.0187(8) 0.0074(6) 0.0103(6) 0.0064(6)
C11 0.0134(7) 0.0154(7) 0.0171(7) 0.0065(6) 0.0078(6) 0.0047(6)
C12 0.0138(7) 0.0121(6) 0.0115(7) 0.0033(5) 0.0047(6) 0.0015(5)
C13 0.0134(7) 0.0110(6) 0.0109(6) 0.0038(5) 0.0045(5) 0.0028(5)
C14 0.0139(7) 0.0123(7) 0.0138(7) 0.0035(5) 0.0069(6) 0.0014(5)
C15 0.0157(7) 0.0114(6) 0.0125(7) 0.0051(5) 0.0035(6) 0.0042(5)
C16 0.0130(7) 0.0166(7) 0.0156(7) 0.0069(6) 0.0061(6) 0.0032(6)
C17 0.0265(9) 0.0229(8) 0.0225(9) 0.0072(7) 0.0161(8) 0.0038(7)
C18 0.0145(8) 0.0403(11) 0.0237(9) 0.0181(8) 0.0056(7) 0.0021(7)
C19 0.0200(8) 0.0173(8) 0.0370(10) 0.0112(7) 0.0152(8) 0.0026(6)
C20 0.0204(8) 0.0187(8) 0.0426(11) 0.0184(8) 0.0198(8) 0.0105(7)
C21A 0.0357(19) 0.0316(17) 0.0340(18) 0.0227(15) 0.0137(15) 0.0177(14)
C21B 0.038(3) 0.025(3) 0.039(3) 0.016(2) 0.001(3) 0.013(2)
C22A 0.0202(18) 0.0141(15) 0.055(3) 0.012(2) 0.013(2) 0.0047(12)
C22B 0.029(3) 0.021(3) 0.056(5) 0.023(3) 0.027(4) 0.012(2)
C23A 0.0291(18) 0.0274(16) 0.063(3) 0.0275(18) 0.0325(19) 0.0192(14)
C23B 0.056(4) 0.021(3) 0.052(4) 0.021(3) 0.044(4) 0.026(3)
C24 0.0141(7) 0.0148(7) 0.0144(7) 0.0060(6) 0.0044(6) 0.0006(5)
C25 0.0232(9) 0.0207(8) 0.0160(8) 0.0042(6) 0.0075(7) -0.0038(7)
C26 0.0294(10) 0.0312(10) 0.0234(9) 0.0127(8) 0.0128(8) -0.0028(8)
C27 0.0257(9) 0.0249(9) 0.0310(10) 0.0151(8) 0.0100(8) -0.0028(7)
C28 0.0213(9) 0.0175(8) 0.0258(9) 0.0064(7) 0.0050(7) -0.0032(6)
C29 0.0195(8) 0.0155(7) 0.0175(8) 0.0052(6) 0.0062(6) -0.0002(6)
C30 0.0166(7) 0.0126(7) 0.0121(7) 0.0040(5) 0.0039(6) 0.0014(5)
C31 0.0201(8) 0.0156(7) 0.0167(7) 0.0049(6) 0.0078(6) 0.0055(6)
C32 0.0224(9) 0.0188(8) 0.0208(8) 0.0067(7) 0.0045(7) 0.0079(7)
C33 0.0289(10) 0.0191(8) 0.0163(8) 0.0077(7) 0.0010(7) 0.0007(7)
C34 0.0269(9) 0.0309(10) 0.0180(8) 0.0132(7) 0.0070(7) 0.0001(8)
C35 0.0179(8) 0.0290(9) 0.0176(8) 0.0105(7) 0.0061(7) 0.0006(7)
C36 0.0174(7) 0.0121(7) 0.0147(7) 0.0057(6) 0.0082(6) 0.0053(5)
C37 0.0217(8) 0.0144(7) 0.0140(7) 0.0058(6) 0.0060(6) 0.0043(6)
C38 0.0273(9) 0.0174(8) 0.0179(8) 0.0101(6) 0.0070(7) 0.0076(7)
C39 0.0262(9) 0.0126(7) 0.0222(8) 0.0089(6) 0.0110(7) 0.0067(6)
C40 0.0243(9) 0.0127(7) 0.0171(8) 0.0039(6) 0.0074(7) 0.0028(6)
C41 0.0234(8) 0.0135(7) 0.0159(7) 0.0059(6) 0.0060(6) 0.0052(6)
C42 0.0164(7) 0.0134(7) 0.0116(7) 0.0045(5) 0.0044(6) 0.0023(5)
C43 0.0228(9) 0.0252(9) 0.0202(8) 0.0135(7) 0.0089(7) 0.0079(7)
C44 0.0327(11) 0.0390(11) 0.0242(9) 0.0220(9) 0.0121(8) 0.0097(9)
C45 0.0321(10) 0.0348(10) 0.0218(9) 0.0132(8) 0.0150(8) 0.0014(8)
C46 0.0254(9) 0.0304(10) 0.0259(9) 0.0120(8) 0.0156(8) 0.0065(7)
C47 0.0206(8) 0.0228(8) 0.0199(8) 0.0104(7) 0.0100(7) 0.0069(6)
C48 0.0190(8) 0.0174(8) 0.0246(9) 0.0054(7) 0.0110(7) 0.0053(6)

_geom_special_details
;
 All esds (except the esd in the dihedral angle between two l.s. planes)
 are estimated using the full covariance matrix.  The cell esds are taken
 into account individually in the estimation of esds in distances, angles
 and torsion angles; correlations between esds in cell parameters are only
 used when they are defined by crystal symmetry.  An approximate (isotropic)
 treatment of cell esds is used for estimating esds involving l.s. planes.
;

loop_
_geom_bond_atom_site_label_1
_geom_bond_atom_site_label_2
_geom_bond_distance
_geom_bond_site_symmetry_2
_geom_bond_publ_flag
Rh C48 1.8203(19) . ?
Rh N1 2.1161(15) . ?
Rh P2 2.3057(11) . ?
Rh P1 2.3065(11) . ?
P1 C30 1.8206(18) . ?
P1 C14 1.8257(17) . ?
P1 C24 1.8272(17) . ?
P2 C15 1.8199(17) . ?
P2 C36 1.8227(17) . ?
P2 C42 1.8247(18) . ?
O C48 1.146(2) . ?
N1 C13 1.401(2) . ?
N1 C2 1.404(2) . ?
C2 C3 1.408(2) . ?
C2 C7 1.413(2) . ?
C3 C4 1.387(2) . ?
C3 C15 1.498(2) . ?
C4 C5 1.411(2) . ?
C4 H4 0.9500 . ?
C5 C6 1.387(2) . ?
C5 C16 1.528(2) . ?
C6 C7 1.402(2) . ?
C6 H6 0.9500 . ?
C7 C8 1.433(2) . ?
C8 C9 1.398(2) . ?
C8 C13 1.418(2) . ?
C9 C10 1.387(2) . ?
C9 H9 0.9500 . ?
C10 C11 1.411(2) . ?
C10 C20 1.533(2) . ?
C11 C12 1.394(2) . ?
C11 H11 0.9500 . ?
C12 C13 1.403(2) . ?
C12 C14 1.504(2) . ?
C14 H14A 0.9900 . ?
C14 H14B 0.9900 . ?
C15 H15A 0.9900 . ?
C15 H15B 0.9900 . ?
C16 C19 1.529(2) . ?
C16 C17 1.535(2) . ?
C16 C18 1.538(2) . ?
C17 H17A 0.9800 . ?
C17 H17B 0.9800 . ?
C17 H17C 0.9800 . ?
C18 H18A 0.9800 . ?
C18 H18B 0.9800 . ?
C18 H18C 0.9800 . ?
C19 H19A 0.9800 . ?
C19 H19B 0.9800 . ?
C19 H19C 0.9800 . ?
C20 C21B 1.382(6) . ?
C20 C22A 1.461(5) . ?
C20 C23A 1.509(3) . ?
C20 C22B 1.581(8) . ?
C20 C21A 1.629(4) . ?
C20 C23B 1.656(6) . ?
C21A H21A 0.9800 . ?
C21A H21B 0.9800 . ?
C21A H21C 0.9800 . ?
C21B H21D 0.9800 . ?
C21B H21E 0.9800 . ?
C21B H21F 0.9800 . ?
C22A H22A 0.9800 . ?
C22A H22B 0.9800 . ?
C22A H22C 0.9800 . ?
C22B H22D 0.9800 . ?
C22B H22E 0.9800 . ?
C22B H22F 0.9800 . ?
C23A H23A 0.9800 . ?
C23A H23B 0.9800 . ?
C23A H23C 0.9800 . ?
C23B H23D 0.9800 . ?
C23B H23E 0.9800 . ?
C23B H23F 0.9800 . ?
C24 C25 1.391(2) . ?
C24 C29 1.400(2) . ?
C25 C26 1.395(2) . ?
C25 H25 0.9500 . ?
C26 C27 1.387(3) . ?
C26 H26 0.9500 . ?
C27 C28 1.387(3) . ?
C27 H27 0.9500 . ?
C28 C29 1.389(2) . ?
C28 H28 0.9500 . ?
C29 H29 0.9500 . ?
C30 C35 1.394(2) . ?
C30 C31 1.397(2) . ?
C31 C32 1.389(2) . ?
C31 H31 0.9500 . ?
C32 C33 1.391(3) . ?
C32 H32 0.9500 . ?
C33 C34 1.383(3) . ?
C33 H33 0.9500 . ?
C34 C35 1.394(3) . ?
C34 H34 0.9500 . ?
C35 H35 0.9500 . ?
C36 C37 1.394(2) . ?
C36 C41 1.395(2) . ?
C37 C38 1.397(2) . ?
C37 H37 0.9500 . ?
C38 C39 1.388(2) . ?
C38 H38 0.9500 . ?
C39 C40 1.385(2) . ?
C39 H39 0.9500 . ?
C40 C41 1.387(2) . ?
C40 H40 0.9500 . ?
C41 H41 0.9500 . ?
C42 C43 1.393(2) . ?
C42 C47 1.394(2) . ?
C43 C44 1.392(3) . ?
C43 H43 0.9500 . ?
C44 C45 1.381(3) . ?
C44 H44 0.9500 . ?
C45 C46 1.390(3) . ?
C45 H45 0.9500 . ?
C46 C47 1.392(3) . ?
C46 H46 0.9500 . ?
C47 H47 0.9500 . ?

loop_
_geom_angle_atom_site_label_1
_geom_angle_atom_site_label_2
_geom_angle_atom_site_label_3
_geom_angle
_geom_angle_site_symmetry_1
_geom_angle_site_symmetry_3
_geom_angle_publ_flag
C48 Rh N1 179.67(7) . . ?
C48 Rh P2 89.82(6) . . ?
N1 Rh P2 90.49(5) . . ?
C48 Rh P1 88.42(6) . . ?
N1 Rh P1 91.28(5) . . ?
P2 Rh P1 178.209(16) . . ?
C30 P1 C14 102.05(8) . . ?
C30 P1 C24 103.74(8) . . ?
C14 P1 C24 104.67(8) . . ?
C30 P1 Rh 115.04(6) . . ?
C14 P1 Rh 110.57(6) . . ?
C24 P1 Rh 118.98(6) . . ?
C15 P2 C36 105.14(8) . . ?
C15 P2 C42 102.97(8) . . ?
C36 P2 C42 101.55(7) . . ?
C15 P2 Rh 109.57(6) . . ?
C36 P2 Rh 118.67(5) . . ?
C42 P2 Rh 117.20(6) . . ?
C13 N1 C2 104.15(12) . . ?
C13 N1 Rh 123.25(11) . . ?
C2 N1 Rh 123.64(10) . . ?
N1 C2 C3 129.39(14) . . ?
N1 C2 C7 111.82(13) . . ?
C3 C2 C7 118.76(14) . . ?
C4 C3 C2 118.01(14) . . ?
C4 C3 C15 119.97(14) . . ?
C2 C3 C15 122.02(14) . . ?
C3 C4 C5 123.86(15) . . ?
C3 C4 H4 118.1 . . ?
C5 C4 H4 118.1 . . ?
C6 C5 C4 117.61(14) . . ?
C6 C5 C16 122.64(14) . . ?
C4 C5 C16 119.70(14) . . ?
C5 C6 C7 119.90(14) . . ?
C5 C6 H6 120.1 . . ?
C7 C6 H6 120.1 . . ?
C6 C7 C2 121.69(14) . . ?
C6 C7 C8 132.12(14) . . ?
C2 C7 C8 106.19(13) . . ?
C9 C8 C13 121.78(15) . . ?
C9 C8 C7 132.42(14) . . ?
C13 C8 C7 105.76(13) . . ?
C10 C9 C8 120.07(15) . . ?
C10 C9 H9 120.0 . . ?
C8 C9 H9 120.0 . . ?
C9 C10 C11 117.43(15) . . ?
C9 C10 C20 121.58(14) . . ?
C11 C10 C20 120.96(15) . . ?
C12 C11 C10 123.71(15) . . ?
C12 C11 H11 118.1 . . ?
C10 C11 H11 118.1 . . ?
C11 C12 C13 118.09(14) . . ?
C11 C12 C14 120.31(14) . . ?
C13 C12 C14 121.56(14) . . ?
N1 C13 C12 129.57(14) . . ?
N1 C13 C8 111.97(14) . . ?
C12 C13 C8 118.41(14) . . ?
C12 C14 P1 109.80(11) . . ?
C12 C14 H14A 109.7 . . ?
P1 C14 H14A 109.7 . . ?
C12 C14 H14B 109.7 . . ?
P1 C14 H14B 109.7 . . ?
H14A C14 H14B 108.2 . . ?
C3 C15 P2 107.97(11) . . ?
C3 C15 H15A 110.1 . . ?
P2 C15 H15A 110.1 . . ?
C3 C15 H15B 110.1 . . ?
P2 C15 H15B 110.1 . . ?
H15A C15 H15B 108.4 . . ?
C5 C16 C19 112.11(14) . . ?
C5 C16 C17 107.54(13) . . ?
C19 C16 C17 108.68(14) . . ?
C5 C16 C18 110.77(14) . . ?
C19 C16 C18 108.24(15) . . ?
C17 C16 C18 109.47(15) . . ?
C16 C17 H17A 109.5 . . ?
C16 C17 H17B 109.5 . . ?
H17A C17 H17B 109.5 . . ?
C16 C17 H17C 109.5 . . ?
H17A C17 H17C 109.5 . . ?
H17B C17 H17C 109.5 . . ?
C16 C18 H18A 109.5 . . ?
C16 C18 H18B 109.5 . . ?
H18A C18 H18B 109.5 . . ?
C16 C18 H18C 109.5 . . ?
H18A C18 H18C 109.5 . . ?
H18B C18 H18C 109.5 . . ?
C16 C19 H19A 109.5 . . ?
C16 C19 H19B 109.5 . . ?
H19A C19 H19B 109.5 . . ?
C16 C19 H19C 109.5 . . ?
H19A C19 H19C 109.5 . . ?
H19B C19 H19C 109.5 . . ?
C21B C20 C22A 128.2(4) . . ?
C21B C20 C23A 67.2(4) . . ?
C22A C20 C23A 112.6(3) . . ?
C21B C20 C10 113.2(3) . . ?
C22A C20 C10 113.1(2) . . ?
C23A C20 C10 113.64(17) . . ?
C21B C20 C22B 115.2(5) . . ?
C22A C20 C22B 22.3(3) . . ?
C23A C20 C22B 128.3(3) . . ?
C10 C20 C22B 111.5(3) . . ?
C21B C20 C21A 37.7(3) . . ?
C22A C20 C21A 107.0(3) . . ?
C23A C20 C21A 104.0(2) . . ?
C10 C20 C21A 105.62(17) . . ?
C22B C20 C21A 86.7(4) . . ?
C21B C20 C23B 110.7(4) . . ?
C22A C20 C23B 78.0(3) . . ?
C23A C20 C23B 44.7(3) . . ?
C10 C20 C23B 105.1(2) . . ?
C22B C20 C23B 99.9(4) . . ?
C21A C20 C23B 143.6(3) . . ?
C20 C21A H21A 109.5 . . ?
C20 C21A H21B 109.5 . . ?
C20 C21A H21C 109.5 . . ?
C20 C21B H21D 109.5 . . ?
C20 C21B H21E 109.5 . . ?
H21D C21B H21E 109.5 . . ?
C20 C21B H21F 109.5 . . ?
H21D C21B H21F 109.5 . . ?
H21E C21B H21F 109.5 . . ?
C20 C22A H22A 109.5 . . ?
C20 C22A H22B 109.5 . . ?
C20 C22A H22C 109.5 . . ?
C20 C22B H22D 109.5 . . ?
C20 C22B H22E 109.5 . . ?
H22D C22B H22E 109.5 . . ?
C20 C22B H22F 109.5 . . ?
H22D C22B H22F 109.5 . . ?
H22E C22B H22F 109.5 . . ?
C20 C23A H23A 109.5 . . ?
C20 C23A H23B 109.5 . . ?
C20 C23A H23C 109.5 . . ?
C20 C23B H23D 109.5 . . ?
C20 C23B H23E 109.5 . . ?
H23D C23B H23E 109.5 . . ?
C20 C23B H23F 109.5 . . ?
H23D C23B H23F 109.5 . . ?
H23E C23B H23F 109.5 . . ?
C25 C24 C29 118.53(15) . . ?
C25 C24 P1 122.52(13) . . ?
C29 C24 P1 118.94(13) . . ?
C24 C25 C26 120.66(17) . . ?
C24 C25 H25 119.7 . . ?
C26 C25 H25 119.7 . . ?
C27 C26 C25 120.25(18) . . ?
C27 C26 H26 119.9 . . ?
C25 C26 H26 119.9 . . ?
C26 C27 C28 119.62(17) . . ?
C26 C27 H27 120.2 . . ?
C28 C27 H27 120.2 . . ?
C27 C28 C29 120.17(17) . . ?
C27 C28 H28 119.9 . . ?
C29 C28 H28 119.9 . . ?
C28 C29 C24 120.78(17) . . ?
C28 C29 H29 119.6 . . ?
C24 C29 H29 119.6 . . ?
C35 C30 C31 119.13(16) . . ?
C35 C30 P1 119.65(13) . . ?
C31 C30 P1 121.05(13) . . ?
C32 C31 C30 120.27(16) . . ?
C32 C31 H31 119.9 . . ?
C30 C31 H31 119.9 . . ?
C31 C32 C33 120.15(18) . . ?
C31 C32 H32 119.9 . . ?
C33 C32 H32 119.9 . . ?
C34 C33 C32 119.99(17) . . ?
C34 C33 H33 120.0 . . ?
C32 C33 H33 120.0 . . ?
C33 C34 C35 120.07(18) . . ?
C33 C34 H34 120.0 . . ?
C35 C34 H34 120.0 . . ?
C30 C35 C34 120.38(18) . . ?
C30 C35 H35 119.8 . . ?
C34 C35 H35 119.8 . . ?
C37 C36 C41 119.51(15) . . ?
C37 C36 P2 122.32(12) . . ?
C41 C36 P2 118.14(12) . . ?
C36 C37 C38 119.71(16) . . ?
C36 C37 H37 120.1 . . ?
C38 C37 H37 120.1 . . ?
C39 C38 C37 120.29(16) . . ?
C39 C38 H38 119.9 . . ?
C37 C38 H38 119.9 . . ?
C40 C39 C38 119.92(16) . . ?
C40 C39 H39 120.0 . . ?
C38 C39 H39 120.0 . . ?
C39 C40 C41 120.15(16) . . ?
C39 C40 H40 119.9 . . ?
C41 C40 H40 119.9 . . ?
C40 C41 C36 120.41(16) . . ?
C40 C41 H41 119.8 . . ?
C36 C41 H41 119.8 . . ?
C43 C42 C47 119.55(16) . . ?
C43 C42 P2 119.82(13) . . ?
C47 C42 P2 120.55(12) . . ?
C44 C43 C42 119.81(18) . . ?
C44 C43 H43 120.1 . . ?
C42 C43 H43 120.1 . . ?
C45 C44 C43 120.43(18) . . ?
C45 C44 H44 119.8 . . ?
C43 C44 H44 119.8 . . ?
C44 C45 C46 120.19(17) . . ?
C44 C45 H45 119.9 . . ?
C46 C45 H45 119.9 . . ?
C45 C46 C47 119.62(18) . . ?
C45 C46 H46 120.2 . . ?
C47 C46 H46 120.2 . . ?
C46 C47 C42 120.39(17) . . ?
C46 C47 H47 119.8 . . ?
C42 C47 H47 119.8 . . ?
O C48 Rh 178.26(17) . . ?

loop_
_geom_torsion_atom_site_label_1
_geom_torsion_atom_site_label_2
_geom_torsion_atom_site_label_3
_geom_torsion_atom_site_label_4
_geom_torsion
_geom_torsion_site_symmetry_1
_geom_torsion_site_symmetry_2
_geom_torsion_site_symmetry_3
_geom_torsion_site_symmetry_4
_geom_torsion_publ_flag
C48 Rh P1 C30 84.93(9) . . . . ?
N1 Rh P1 C30 -95.19(7) . . . . ?
P2 Rh P1 C30 75.0(5) . . . . ?
C48 Rh P1 C14 -160.15(8) . . . . ?
N1 Rh P1 C14 19.74(7) . . . . ?
P2 Rh P1 C14 -170.1(5) . . . . ?
C48 Rh P1 C24 -39.01(9) . . . . ?
N1 Rh P1 C24 140.87(7) . . . . ?
P2 Rh P1 C24 -49.0(5) . . . . ?
C48 Rh P2 C15 152.05(8) . . . . ?
N1 Rh P2 C15 -27.84(7) . . . . ?
P1 Rh P2 C15 162.0(5) . . . . ?
C48 Rh P2 C36 31.36(9) . . . . ?
N1 Rh P2 C36 -148.53(7) . . . . ?
P1 Rh P2 C36 41.3(5) . . . . ?
C48 Rh P2 C42 -91.17(9) . . . . ?
N1 Rh P2 C42 88.94(7) . . . . ?
P1 Rh P2 C42 -81.2(5) . . . . ?
C48 Rh N1 C13 43(15) . . . . ?
P2 Rh N1 C13 -157.61(12) . . . . ?
P1 Rh N1 C13 22.09(12) . . . . ?
C48 Rh N1 C2 -175(100) . . . . ?
P2 Rh N1 C2 -15.65(12) . . . . ?
P1 Rh N1 C2 164.04(11) . . . . ?
C13 N1 C2 C3 -175.18(15) . . . . ?
Rh N1 C2 C3 36.9(2) . . . . ?
C13 N1 C2 C7 2.71(17) . . . . ?
Rh N1 C2 C7 -145.19(11) . . . . ?
N1 C2 C3 C4 -177.65(15) . . . . ?
C7 C2 C3 C4 4.6(2) . . . . ?
N1 C2 C3 C15 3.1(2) . . . . ?
C7 C2 C3 C15 -174.65(14) . . . . ?
C2 C3 C4 C5 -2.1(2) . . . . ?
C15 C3 C4 C5 177.19(14) . . . . ?
C3 C4 C5 C6 -1.7(2) . . . . ?
C3 C4 C5 C16 175.79(15) . . . . ?
C4 C5 C6 C7 2.7(2) . . . . ?
C16 C5 C6 C7 -174.64(14) . . . . ?
C5 C6 C7 C2 -0.1(2) . . . . ?
C5 C6 C7 C8 179.30(16) . . . . ?
N1 C2 C7 C6 178.24(14) . . . . ?
C3 C2 C7 C6 -3.6(2) . . . . ?
N1 C2 C7 C8 -1.33(17) . . . . ?
C3 C2 C7 C8 176.81(13) . . . . ?
C6 C7 C8 C9 -2.5(3) . . . . ?
C2 C7 C8 C9 177.00(17) . . . . ?
C6 C7 C8 C13 179.87(16) . . . . ?
C2 C7 C8 C13 -0.63(16) . . . . ?
C13 C8 C9 C10 -0.9(2) . . . . ?
C7 C8 C9 C10 -178.16(16) . . . . ?
C8 C9 C10 C11 -3.8(2) . . . . ?
C8 C9 C10 C20 174.04(16) . . . . ?
C9 C10 C11 C12 2.5(2) . . . . ?
C20 C10 C11 C12 -175.27(16) . . . . ?
C10 C11 C12 C13 3.4(2) . . . . ?
C10 C11 C12 C14 -174.49(15) . . . . ?
C2 N1 C13 C12 174.16(16) . . . . ?
Rh N1 C13 C12 -37.8(2) . . . . ?
C2 N1 C13 C8 -3.13(17) . . . . ?
Rh N1 C13 C8 144.92(11) . . . . ?
C11 C12 C13 N1 174.99(15) . . . . ?
C14 C12 C13 N1 -7.2(3) . . . . ?
C11 C12 C13 C8 -7.9(2) . . . . ?
C14 C12 C13 C8 169.99(14) . . . . ?
C9 C8 C13 N1 -175.53(14) . . . . ?
C7 C8 C13 N1 2.41(17) . . . . ?
C9 C8 C13 C12 6.8(2) . . . . ?
C7 C8 C13 C12 -175.22(14) . . . . ?
C11 C12 C14 P1 -125.19(14) . . . . ?
C13 C12 C14 P1 57.00(18) . . . . ?
C30 P1 C14 C12 66.07(13) . . . . ?
C24 P1 C14 C12 173.95(11) . . . . ?
Rh P1 C14 C12 -56.77(12) . . . . ?
C4 C3 C15 P2 124.81(14) . . . . ?
C2 C3 C15 P2 -55.97(17) . . . . ?
C36 P2 C15 C3 -168.46(11) . . . . ?
C42 P2 C15 C3 -62.49(12) . . . . ?
Rh P2 C15 C3 62.95(12) . . . . ?
C6 C5 C16 C19 -6.7(2) . . . . ?
C4 C5 C16 C19 175.95(15) . . . . ?
C6 C5 C16 C17 112.66(17) . . . . ?
C4 C5 C16 C17 -64.65(19) . . . . ?
C6 C5 C16 C18 -127.76(17) . . . . ?
C4 C5 C16 C18 54.9(2) . . . . ?
C9 C10 C20 C21B -119.7(4) . . . . ?
C11 C10 C20 C21B 58.0(4) . . . . ?
C9 C10 C20 C22A 36.3(3) . . . . ?
C11 C10 C20 C22A -146.0(3) . . . . ?
C9 C10 C20 C23A 166.2(2) . . . . ?
C11 C10 C20 C23A -16.1(3) . . . . ?
C9 C10 C20 C22B 12.2(4) . . . . ?
C11 C10 C20 C22B -170.1(4) . . . . ?
C9 C10 C20 C21A -80.4(2) . . . . ?
C11 C10 C20 C21A 97.3(2) . . . . ?
C9 C10 C20 C23B 119.5(3) . . . . ?
C11 C10 C20 C23B -62.8(3) . . . . ?
C30 P1 C24 C25 126.50(15) . . . . ?
C14 P1 C24 C25 19.87(17) . . . . ?
Rh P1 C24 C25 -104.20(15) . . . . ?
C30 P1 C24 C29 -54.85(15) . . . . ?
C14 P1 C24 C29 -161.48(14) . . . . ?
Rh P1 C24 C29 74.45(14) . . . . ?
C29 C24 C25 C26 0.3(3) . . . . ?
P1 C24 C25 C26 178.94(15) . . . . ?
C24 C25 C26 C27 -0.8(3) . . . . ?
C25 C26 C27 C28 0.8(3) . . . . ?
C26 C27 C28 C29 -0.1(3) . . . . ?
C27 C28 C29 C24 -0.4(3) . . . . ?
C25 C24 C29 C28 0.3(3) . . . . ?
P1 C24 C29 C28 -178.37(14) . . . . ?
C14 P1 C30 C35 -107.93(15) . . . . ?
C24 P1 C30 C35 143.48(14) . . . . ?
Rh P1 C30 C35 11.82(16) . . . . ?
C14 P1 C30 C31 67.30(15) . . . . ?
C24 P1 C30 C31 -41.29(15) . . . . ?
Rh P1 C30 C31 -172.95(11) . . . . ?
C35 C30 C31 C32 1.5(2) . . . . ?
P1 C30 C31 C32 -173.72(13) . . . . ?
C30 C31 C32 C33 -1.0(3) . . . . ?
C31 C32 C33 C34 -0.2(3) . . . . ?
C32 C33 C34 C35 0.9(3) . . . . ?
C31 C30 C35 C34 -0.8(3) . . . . ?
P1 C30 C35 C34 174.49(14) . . . . ?
C33 C34 C35 C30 -0.4(3) . . . . ?
C15 P2 C36 C37 -14.60(16) . . . . ?
C42 P2 C36 C37 -121.62(15) . . . . ?
Rh P2 C36 C37 108.32(14) . . . . ?
C15 P2 C36 C41 163.38(13) . . . . ?
C42 P2 C36 C41 56.36(15) . . . . ?
Rh P2 C36 C41 -73.70(14) . . . . ?
C41 C36 C37 C38 -0.9(3) . . . . ?
P2 C36 C37 C38 177.09(13) . . . . ?
C36 C37 C38 C39 0.4(3) . . . . ?
C37 C38 C39 C40 0.6(3) . . . . ?
C38 C39 C40 C41 -1.2(3) . . . . ?
C39 C40 C41 C36 0.7(3) . . . . ?
C37 C36 C41 C40 0.3(3) . . . . ?
P2 C36 C41 C40 -177.71(14) . . . . ?
C15 P2 C42 C43 109.08(15) . . . . ?
C36 P2 C42 C43 -142.21(14) . . . . ?
Rh P2 C42 C43 -11.24(16) . . . . ?
C15 P2 C42 C47 -67.87(15) . . . . ?
C36 P2 C42 C47 40.83(15) . . . . ?
Rh P2 C42 C47 171.80(12) . . . . ?
C47 C42 C43 C44 -0.4(3) . . . . ?
P2 C42 C43 C44 -177.43(15) . . . . ?
C42 C43 C44 C45 -0.5(3) . . . . ?
C43 C44 C45 C46 1.1(3) . . . . ?
C44 C45 C46 C47 -0.7(3) . . . . ?
C45 C46 C47 C42 -0.3(3) . . . . ?
C43 C42 C47 C46 0.8(3) . . . . ?
P2 C42 C47 C46 177.79(14) . . . . ?
N1 Rh C48 O 30(18) . . . . ?
P2 Rh C48 O -129(6) . . . . ?
P1 Rh C48 O 51(6) . . . . ?

_diffrn_measured_fraction_theta_max 0.925
_diffrn_reflns_theta_full        31.00
_diffrn_measured_fraction_theta_full 0.989
_refine_diff_density_max         0.960
_refine_diff_density_min         -0.465
_refine_diff_density_rms         0.086

_diffrn_ambient_environment      'perfluoro polyether oil'
_diffrn_measurement_device       'three-circle diffractometer'
_diffrn_measurement_specimen_support 'polyimid foil'
_diffrn_detector                 'CCD plate'
_diffrn_detector_type            CCD-PXL-KAF2
_refine_ls_abs_structure_details 'Flack H D (1983), Acta Cryst. A39, 876-881'


#==end==


data_complex_13b

_audit_creation_method           SHELXL-97
_audit_block_code                ga_ng24b
_audit_block_refno               1552
_audit_block_usercomment         'NGBP-004, needle, green'
_audit_creation_date
;
'Tue Jul 31 00:22:06 2012'
;
_audit_update_record             'Mon Oct 29 17:37:06 CET 2012'


_chemical_name_systematic        ?
_chemical_name_common            ?
_chemical_formula_moiety         ?
_chemical_formula_sum            'C59 H70 Br N Ni P2'
_chemical_melting_point          ?

_exptl_crystal_description       needle
_exptl_crystal_colour            green
_diffrn_ambient_temperature      120.01(10)
_chemical_formula_weight         993.72

loop_
_atom_type_symbol
_atom_type_description
_atom_type_scat_dispersion_real
_atom_type_scat_dispersion_imag
_atom_type_scat_source
C C 0.0181 0.0091 'International Tables Vol C Tables 4.2.6.8 and 6.1.1.4'
H H 0.0000 0.0000 'International Tables Vol C Tables 4.2.6.8 and 6.1.1.4'
Br Br -0.6763 1.2805 'International Tables Vol C Tables 4.2.6.8 and 6.1.1.4'
N N 0.0311 0.0180 'International Tables Vol C Tables 4.2.6.8 and 6.1.1.4'
Ni Ni -3.0029 0.5091 'International Tables Vol C Tables 4.2.6.8 and 6.1.1.4'
P P 0.2955 0.4335 'International Tables Vol C Tables 4.2.6.8 and 6.1.1.4'

_symmetry_cell_setting           orthorhombic
_symmetry_space_group_name_H-M   'P 21 21 21'
_symmetry_int_tables_number      19
_chemical_absolute_configuration ad

loop_
_symmetry_equiv_pos_as_xyz
'x, y, z'
'-x+1/2, -y, z+1/2'
'x+1/2, -y+1/2, -z'
'-x, y+1/2, -z+1/2'

_cell_length_a                   10.0831(7)
_cell_length_b                   20.0090(11)
_cell_length_c                   25.1315(11)
_cell_angle_alpha                90.00
_cell_angle_beta                 90.00
_cell_angle_gamma                90.00
_cell_volume                     5070.4(5)
_cell_formula_units_Z            4
_cell_measurement_temperature    120.01(10)
_cell_measurement_reflns_used    21126
_cell_measurement_theta_min      3.5144
_cell_measurement_theta_max      73.3544
_exptl_crystal_size_max          0.3288
_exptl_crystal_size_mid          0.0720
_exptl_crystal_size_min          0.0333
_exptl_crystal_density_meas      ?
_exptl_crystal_density_diffrn    1.302
_exptl_crystal_density_method    'not measured'
_exptl_crystal_F_000             2096
_exptl_absorpt_coefficient_mu    2.354
_exptl_absorpt_correction_type   gaussian
_exptl_absorpt_correction_T_min  0.890
_exptl_absorpt_correction_T_max  0.981
_exptl_absorpt_process_details
;
CrysAlisPro, Agilent Technologies,
Version 1.171.35.21 (release 20-01-2012 CrysAlis171 .NET)
(compiled Jan 23 2012,18:06:46)
Numerical absorption correction based on gaussian integration over
			a multifaceted crystal model
;

_exptl_special_details
;
 ?
;
_diffrn_radiation_probe          x-ray
_diffrn_radiation_type           'Cu K\a'
_diffrn_radiation_wavelength     1.5418
_diffrn_source                   'microfocus X-Ray tube'
_diffrn_source_type              'Agilent SuperNova (Cu) X-ray Source'
_diffrn_radiation_monochromator  mirror
_diffrn_measurement_device_type  'Agilent SuperNova, Dual, Cu at zero, Eos'
_diffrn_measurement_method       '\w scans'
_diffrn_detector_area_resol_mean 7.9621
_diffrn_reflns_number            122909
_diffrn_reflns_av_R_equivalents  0.1064
_diffrn_reflns_av_sigmaI/netI    0.0392
_diffrn_reflns_limit_h_min       -12
_diffrn_reflns_limit_h_max       12
_diffrn_reflns_limit_k_min       -24
_diffrn_reflns_limit_k_max       24
_diffrn_reflns_limit_l_min       -30
_diffrn_reflns_limit_l_max       30
_diffrn_reflns_theta_min         3.52
_diffrn_reflns_theta_max         73.51
_reflns_number_total             9958
_reflns_number_gt                9344
_reflns_threshold_expression     >2sigma(I)
_computing_data_collection
;
CrysAlisPro, Agilent Technologies,
Version 1.171.35.21 (release 20-01-2012 CrysAlis171 .NET)
(compiled Jan 23 2012,18:06:46)
;
_computing_cell_refinement
;
CrysAlisPro, Agilent Technologies,
Version 1.171.35.21 (release 20-01-2012 CrysAlis171 .NET)
(compiled Jan 23 2012,18:06:46)
;
_computing_data_reduction
;
CrysAlisPro, Agilent Technologies,
Version 1.171.35.21 (release 20-01-2012 CrysAlis171 .NET)
(compiled Jan 23 2012,18:06:46)
;
_computing_structure_solution    'SUPERFLIP (Palatinus, 2007-2009)'
_computing_structure_refinement  'SHELXL-97 (Sheldrick, 2008)'
_computing_molecular_graphics    ?
_computing_publication_material  'encif (Wadepohl, 2012); encifer 1.4 (CCDC, 2011)'

_refine_special_details
;
 Refinement of F^2^ against ALL reflections.  The weighted R-factor wR and
 goodness of fit S are based on F^2^, conventional R-factors R are based
 on F, with F set to zero for negative F^2^. The threshold expression of
 F^2^ > 2sigma(F^2^) is used only for calculating R-factors(gt) etc. and is
 not relevant to the choice of reflections for refinement.  R-factors based
 on F^2^ are statistically about twice as large as those based on F, and R-
 factors based on ALL data will be even larger.
;

_refine_ls_structure_factor_coef Fsqd
_refine_ls_matrix_type           full
_refine_ls_weighting_scheme      calc
_refine_ls_weighting_details
'calc w=1/[\s^2^(Fo^2^)+(0.0752P)^2^+1.4243P] where P=(Fo^2^+2Fc^2^)/3'
_atom_sites_solution_primary     iterative
_atom_sites_solution_secondary   difmap
_atom_sites_solution_hydrogens   geom
_refine_ls_hydrogen_treatment    constr
_refine_ls_extinction_method     none
_refine_ls_extinction_coef       ?
_refine_ls_abs_structure_details 'Flack H D (1983), Acta Cryst. A39, 876-881'
_refine_ls_abs_structure_Flack   -0.027(15)
_refine_ls_number_reflns         9958
_refine_ls_number_parameters     585
_refine_ls_number_restraints     0
_refine_ls_R_factor_all          0.0463
_refine_ls_R_factor_gt           0.0426
_refine_ls_wR_factor_ref         0.1153
_refine_ls_wR_factor_gt          0.1108
_refine_ls_goodness_of_fit_ref   1.029
_refine_ls_restrained_S_all      1.029
_refine_ls_shift/su_max          0.002
_refine_ls_shift/su_mean         0.000

loop_
_atom_site_label
_atom_site_type_symbol
_atom_site_fract_x
_atom_site_fract_y
_atom_site_fract_z
_atom_site_U_iso_or_equiv
_atom_site_adp_type
_atom_site_occupancy
_atom_site_symmetry_multiplicity
_atom_site_calc_flag
_atom_site_refinement_flags
_atom_site_disorder_assembly
_atom_site_disorder_group
Br1 Br -0.25909(4) -0.406384(17) -0.874611(12) 0.04219(12) Uani 1 1 d . . .
Ni Ni -0.25084(5) -0.41485(2) -0.783109(17) 0.02075(11) Uani 1 1 d . . .
P1 P -0.31797(7) -0.51903(3) -0.78712(3) 0.02053(14) Uani 1 1 d . . .
P2 P -0.16955(7) -0.31358(3) -0.77646(3) 0.02079(14) Uani 1 1 d . . .
N1 N -0.2509(2) -0.42055(10) -0.70616(9) 0.0215(4) Uani 1 1 d . . .
C2 C -0.1724(3) -0.38511(13) -0.67043(11) 0.0214(5) Uani 1 1 d . . .
C3 C -0.0680(3) -0.33956(13) -0.67895(11) 0.0224(5) Uani 1 1 d . . .
C4 C -0.0075(3) -0.31044(14) -0.63518(11) 0.0248(6) Uani 1 1 d . . .
H4 H 0.0624 -0.2795 -0.6413 0.030 Uiso 1 1 calc R . .
C5 C -0.0439(3) -0.32417(14) -0.58152(11) 0.0249(6) Uani 1 1 d . . .
C6 C -0.1468(3) -0.36831(14) -0.57384(11) 0.0245(6) Uani 1 1 d . . .
H6 H -0.1759 -0.3782 -0.5388 0.029 Uiso 1 1 calc R . .
C7 C -0.2088(3) -0.39867(13) -0.61723(11) 0.0226(6) Uani 1 1 d . . .
C8 C -0.3146(3) -0.44638(13) -0.61980(11) 0.0231(5) Uani 1 1 d . . .
C9 C -0.3845(3) -0.47945(14) -0.57981(11) 0.0245(6) Uani 1 1 d . . .
H9 H -0.3681 -0.4691 -0.5435 0.029 Uiso 1 1 calc R . .
C10 C -0.4779(3) -0.52744(14) -0.59308(11) 0.0245(6) Uani 1 1 d . . .
C11 C -0.4996(3) -0.53943(14) -0.64771(11) 0.0248(6) Uani 1 1 d . . .
H11 H -0.5638 -0.5720 -0.6572 0.030 Uiso 1 1 calc R . .
C12 C -0.4330(3) -0.50652(14) -0.68853(11) 0.0230(6) Uani 1 1 d . . .
C13 C -0.3369(3) -0.45862(13) -0.67466(11) 0.0221(5) Uani 1 1 d . . .
C14 C -0.4639(3) -0.52494(15) -0.74531(11) 0.0248(6) Uani 1 1 d . . .
H14A H -0.5335 -0.4947 -0.7592 0.030 Uiso 1 1 calc R . .
H14B H -0.4987 -0.5712 -0.7465 0.030 Uiso 1 1 calc R . .
C15 C -0.0233(3) -0.32078(14) -0.73416(11) 0.0230(6) Uani 1 1 d . . .
H15A H 0.0371 -0.3554 -0.7484 0.028 Uiso 1 1 calc R . .
H15B H 0.0249 -0.2777 -0.7332 0.028 Uiso 1 1 calc R . .
C16 C -0.1931(3) -0.57923(14) -0.76089(12) 0.0268(6) Uani 1 1 d . . .
H16 H -0.2319 -0.6007 -0.7285 0.032 Uiso 1 1 calc R . .
C17 C -0.1806(4) -0.63350(16) -0.80408(15) 0.0370(7) Uani 1 1 d . . .
H17A H -0.1132 -0.6203 -0.8308 0.044 Uiso 1 1 calc R . .
H17B H -0.1531 -0.6764 -0.7879 0.044 Uiso 1 1 calc R . .
C18 C -0.3169(3) -0.64085(15) -0.83059(13) 0.0332(7) Uani 1 1 d . . .
H18A H -0.3806 -0.6614 -0.8055 0.040 Uiso 1 1 calc R . .
H18B H -0.3100 -0.6698 -0.8624 0.040 Uiso 1 1 calc R . .
C19 C -0.3643(3) -0.57049(14) -0.84659(11) 0.0260(6) Uani 1 1 d . . .
H19 H -0.3077 -0.5553 -0.8769 0.031 Uiso 1 1 calc R . .
C20 C -0.1155(3) -0.25837(14) -0.83240(11) 0.0257(6) Uani 1 1 d . . .
H20 H -0.1683 -0.2709 -0.8646 0.031 Uiso 1 1 calc R . .
C21 C -0.1618(3) -0.18884(15) -0.81416(13) 0.0310(7) Uani 1 1 d . . .
H21A H -0.0968 -0.1695 -0.7890 0.037 Uiso 1 1 calc R . .
H21B H -0.1694 -0.1585 -0.8452 0.037 Uiso 1 1 calc R . .
C22 C -0.2961(3) -0.19647(15) -0.78718(14) 0.0343(7) Uani 1 1 d . . .
H22A H -0.3642 -0.2102 -0.8134 0.041 Uiso 1 1 calc R . .
H22B H -0.3238 -0.1536 -0.7709 0.041 Uiso 1 1 calc R . .
C23 C -0.2793(3) -0.25078(13) -0.74386(11) 0.0250(6) Uani 1 1 d . . .
H23 H -0.2289 -0.2305 -0.7136 0.030 Uiso 1 1 calc R . .
C24 C 0.0368(3) -0.29284(16) -0.53600(11) 0.0297(6) Uani 1 1 d . . .
C25 C -0.0216(4) -0.31092(18) -0.48133(12) 0.0360(7) Uani 1 1 d . . .
H25A H -0.1133 -0.2949 -0.4792 0.054 Uiso 1 1 calc R . .
H25B H 0.0313 -0.2898 -0.4533 0.054 Uiso 1 1 calc R . .
H25C H -0.0200 -0.3595 -0.4767 0.054 Uiso 1 1 calc R . .
C26 C 0.1801(4) -0.3197(2) -0.53826(14) 0.0490(10) Uani 1 1 d . . .
H26A H 0.1789 -0.3685 -0.5352 0.074 Uiso 1 1 calc R . .
H26B H 0.2316 -0.3007 -0.5089 0.074 Uiso 1 1 calc R . .
H26C H 0.2207 -0.3070 -0.5722 0.074 Uiso 1 1 calc R . .
C27 C 0.0387(4) -0.21627(17) -0.54124(14) 0.0414(8) Uani 1 1 d . . .
H27A H 0.0837 -0.2037 -0.5743 0.062 Uiso 1 1 calc R . .
H27B H 0.0860 -0.1969 -0.5109 0.062 Uiso 1 1 calc R . .
H27C H -0.0526 -0.1994 -0.5419 0.062 Uiso 1 1 calc R . .
C28 C -0.5560(3) -0.56713(15) -0.55153(12) 0.0262(6) Uani 1 1 d . . .
C29 C -0.7044(3) -0.55036(17) -0.55659(13) 0.0331(7) Uani 1 1 d . . .
H29A H -0.7172 -0.5022 -0.5519 0.050 Uiso 1 1 calc R . .
H29B H -0.7543 -0.5745 -0.5292 0.050 Uiso 1 1 calc R . .
H29C H -0.7362 -0.5637 -0.5919 0.050 Uiso 1 1 calc R . .
C30 C -0.5371(4) -0.64309(15) -0.56054(13) 0.0339(7) Uani 1 1 d . . .
H30A H -0.5710 -0.6553 -0.5958 0.051 Uiso 1 1 calc R . .
H30B H -0.5857 -0.6679 -0.5332 0.051 Uiso 1 1 calc R . .
H30C H -0.4426 -0.6542 -0.5584 0.051 Uiso 1 1 calc R . .
C31 C -0.5104(3) -0.55116(18) -0.49452(12) 0.0351(7) Uani 1 1 d . . .
H31A H -0.4160 -0.5617 -0.4908 0.053 Uiso 1 1 calc R . .
H31B H -0.5618 -0.5780 -0.4692 0.053 Uiso 1 1 calc R . .
H31C H -0.5245 -0.5036 -0.4872 0.053 Uiso 1 1 calc R . .
C32 C -0.0631(3) -0.54687(15) -0.74465(13) 0.0288(6) Uani 1 1 d . . .
C33 C -0.0389(4) -0.53319(15) -0.69103(13) 0.0307(7) Uani 1 1 d . . .
H33 H -0.1035 -0.5444 -0.6650 0.037 Uiso 1 1 calc R . .
C34 C 0.0791(4) -0.50329(16) -0.67573(14) 0.0367(7) Uani 1 1 d . . .
H34 H 0.0942 -0.4936 -0.6392 0.044 Uiso 1 1 calc R . .
C35 C 0.1751(4) -0.48735(17) -0.71282(16) 0.0422(8) Uani 1 1 d . . .
H35 H 0.2566 -0.4679 -0.7020 0.051 Uiso 1 1 calc R . .
C36 C 0.1501(4) -0.50031(19) -0.76646(15) 0.0429(8) Uani 1 1 d . . .
H36 H 0.2152 -0.4897 -0.7925 0.051 Uiso 1 1 calc R . .
C37 C 0.0317(3) -0.52839(17) -0.78176(14) 0.0360(7) Uani 1 1 d . . .
H37 H 0.0144 -0.5352 -0.8185 0.043 Uiso 1 1 calc R . .
C38 C -0.5064(3) -0.56591(14) -0.86436(11) 0.0263(6) Uani 1 1 d . . .
C39 C -0.5481(4) -0.51447(16) -0.89792(13) 0.0350(7) Uani 1 1 d . . .
H39 H -0.4875 -0.4803 -0.9076 0.042 Uiso 1 1 calc R . .
C40 C -0.6771(4) -0.51258(17) -0.91732(13) 0.0400(8) Uani 1 1 d . . .
H40 H -0.7035 -0.4769 -0.9399 0.048 Uiso 1 1 calc R . .
C41 C -0.7671(4) -0.56170(17) -0.90422(13) 0.0378(7) Uani 1 1 d . . .
H41 H -0.8546 -0.5606 -0.9182 0.045 Uiso 1 1 calc R . .
C42 C -0.7286(4) -0.61263(16) -0.87046(13) 0.0368(7) Uani 1 1 d . . .
H42 H -0.7902 -0.6464 -0.8607 0.044 Uiso 1 1 calc R . .
C43 C -0.5997(3) -0.61444(15) -0.85066(12) 0.0308(6) Uani 1 1 d . . .
H43 H -0.5746 -0.6496 -0.8273 0.037 Uiso 1 1 calc R . .
C44 C 0.0300(3) -0.26623(15) -0.84604(11) 0.0261(6) Uani 1 1 d . . .
C45 C 0.0767(4) -0.32557(18) -0.86711(14) 0.0383(8) Uani 1 1 d . . .
H45 H 0.0170 -0.3616 -0.8729 0.046 Uiso 1 1 calc R . .
C46 C 0.2090(4) -0.3332(2) -0.87981(15) 0.0454(9) Uani 1 1 d . . .
H46 H 0.2392 -0.3743 -0.8942 0.054 Uiso 1 1 calc R . .
C47 C 0.2984(4) -0.2815(2) -0.87184(13) 0.0399(8) Uani 1 1 d . . .
H47 H 0.3894 -0.2868 -0.8808 0.048 Uiso 1 1 calc R . .
C48 C 0.2534(4) -0.22266(18) -0.85088(13) 0.0395(7) Uani 1 1 d . . .
H48 H 0.3135 -0.1868 -0.8452 0.047 Uiso 1 1 calc R . .
C49 C 0.1201(4) -0.21501(17) -0.83781(12) 0.0331(7) Uani 1 1 d . . .
H49 H 0.0905 -0.1740 -0.8230 0.040 Uiso 1 1 calc R . .
C50 C -0.4053(3) -0.27961(14) -0.72176(12) 0.0265(6) Uani 1 1 d . . .
C51 C -0.5083(3) -0.30118(17) -0.75464(14) 0.0342(7) Uani 1 1 d . . .
H51 H -0.4989 -0.2974 -0.7921 0.041 Uiso 1 1 calc R . .
C52 C -0.6236(4) -0.32797(19) -0.73388(14) 0.0386(8) Uani 1 1 d . . .
H52 H -0.6929 -0.3418 -0.7570 0.046 Uiso 1 1 calc R . .
C53 C -0.6383(4) -0.33470(17) -0.67885(15) 0.0380(8) Uani 1 1 d . . .
H53 H -0.7172 -0.3532 -0.6644 0.046 Uiso 1 1 calc R . .
C54 C -0.5367(4) -0.31414(16) -0.64555(13) 0.0339(7) Uani 1 1 d . . .
H54 H -0.5455 -0.3190 -0.6081 0.041 Uiso 1 1 calc R . .
C55 C -0.4217(3) -0.28640(14) -0.66676(12) 0.0277(6) Uani 1 1 d . . .
H55 H -0.3532 -0.2719 -0.6435 0.033 Uiso 1 1 calc R . .
C81 C -0.0745(4) -0.53520(18) -0.52898(16) 0.0441(9) Uani 1 1 d . . .
H81A H -0.0685 -0.4995 -0.5555 0.066 Uiso 1 1 calc R . .
H81B H 0.0115 -0.5405 -0.5113 0.066 Uiso 1 1 calc R . .
H81C H -0.1422 -0.5237 -0.5025 0.066 Uiso 1 1 calc R . .
C82 C -0.1119(4) -0.60005(18) -0.55616(14) 0.0393(8) Uani 1 1 d . . .
H82A H -0.0401 -0.6128 -0.5811 0.047 Uiso 1 1 calc R . .
H82B H -0.1934 -0.5928 -0.5773 0.047 Uiso 1 1 calc R . .
C83 C -0.1355(4) -0.65734(19) -0.51755(14) 0.0405(8) Uani 1 1 d . . .
H83A H -0.1683 -0.6963 -0.5379 0.049 Uiso 1 1 calc R . .
H83B H -0.2064 -0.6440 -0.4924 0.049 Uiso 1 1 calc R . .
C84 C -0.0144(4) -0.67901(17) -0.48540(14) 0.0395(8) Uani 1 1 d . . .
H84A H 0.0243 -0.6393 -0.4678 0.047 Uiso 1 1 calc R . .
H84B H -0.0432 -0.7103 -0.4572 0.047 Uiso 1 1 calc R . .
C85 C 0.0914(4) -0.7124(2) -0.51872(16) 0.0455(9) Uani 1 1 d . . .
H85A H 0.1141 -0.6836 -0.5489 0.068 Uiso 1 1 calc R . .
H85B H 0.0580 -0.7553 -0.5319 0.068 Uiso 1 1 calc R . .
H85C H 0.1705 -0.7200 -0.4969 0.068 Uiso 1 1 calc R . .

loop_
_atom_site_aniso_label
_atom_site_aniso_U_11
_atom_site_aniso_U_22
_atom_site_aniso_U_33
_atom_site_aniso_U_23
_atom_site_aniso_U_13
_atom_site_aniso_U_12
Br1 0.0714(3) 0.03827(17) 0.01694(15) 0.00327(11) -0.00491(16) -0.02680(18)
Ni 0.0302(2) 0.0180(2) 0.0141(2) 0.00055(14) -0.0002(2) -0.0030(2)
P1 0.0275(3) 0.0169(3) 0.0172(3) -0.0012(2) -0.0004(3) -0.0014(3)
P2 0.0275(3) 0.0171(3) 0.0178(3) 0.0011(2) 0.0006(3) -0.0018(3)
N1 0.0271(12) 0.0167(9) 0.0207(10) 0.0003(8) 0.0003(10) -0.0024(10)
C2 0.0272(13) 0.0171(11) 0.0198(12) -0.0002(10) 0.0005(11) 0.0037(11)
C3 0.0292(14) 0.0191(12) 0.0189(13) 0.0012(10) 0.0001(11) 0.0025(11)
C4 0.0299(14) 0.0224(12) 0.0221(13) 0.0006(11) 0.0002(11) 0.0002(11)
C5 0.0316(15) 0.0237(13) 0.0194(13) -0.0015(10) -0.0025(11) 0.0027(12)
C6 0.0326(15) 0.0220(13) 0.0189(12) -0.0002(10) 0.0004(11) 0.0016(11)
C7 0.0300(15) 0.0192(11) 0.0185(12) 0.0022(10) 0.0018(10) 0.0025(11)
C8 0.0282(14) 0.0218(12) 0.0191(12) -0.0003(10) 0.0000(11) 0.0021(11)
C9 0.0313(15) 0.0226(13) 0.0198(13) 0.0010(10) 0.0004(11) 0.0031(12)
C10 0.0290(15) 0.0241(13) 0.0202(13) 0.0012(11) 0.0023(11) 0.0027(12)
C11 0.0295(15) 0.0219(12) 0.0231(13) -0.0014(10) 0.0000(12) -0.0021(12)
C12 0.0285(14) 0.0214(13) 0.0191(13) 0.0001(10) 0.0000(11) 0.0005(11)
C13 0.0286(14) 0.0184(12) 0.0193(12) 0.0003(10) 0.0004(11) 0.0027(11)
C14 0.0281(14) 0.0268(13) 0.0193(13) -0.0012(11) 0.0004(11) -0.0052(12)
C15 0.0285(14) 0.0229(13) 0.0178(13) 0.0011(10) 0.0005(10) -0.0010(11)
C16 0.0314(15) 0.0203(12) 0.0288(14) 0.0010(11) -0.0018(12) 0.0032(11)
C17 0.0390(18) 0.0254(14) 0.0465(19) -0.0115(13) -0.0090(15) 0.0073(14)
C18 0.0413(17) 0.0224(13) 0.0359(16) -0.0089(12) -0.0086(15) 0.0033(13)
C19 0.0381(17) 0.0216(13) 0.0183(12) -0.0037(10) -0.0008(12) -0.0026(12)
C20 0.0393(16) 0.0208(13) 0.0170(12) 0.0043(10) 0.0023(12) -0.0061(12)
C21 0.0381(17) 0.0214(13) 0.0335(15) 0.0062(12) 0.0063(13) 0.0008(13)
C22 0.0383(17) 0.0258(14) 0.0387(17) 0.0069(13) 0.0049(14) 0.0062(13)
C23 0.0297(16) 0.0192(12) 0.0261(13) -0.0016(10) 0.0020(11) 0.0015(11)
C24 0.0346(16) 0.0340(15) 0.0206(14) -0.0046(12) -0.0014(12) -0.0042(13)
C25 0.0437(19) 0.0426(17) 0.0216(14) -0.0030(13) -0.0053(13) -0.0056(15)
C26 0.0389(19) 0.076(3) 0.0320(17) -0.0134(18) -0.0082(15) 0.005(2)
C27 0.059(2) 0.0353(17) 0.0303(17) -0.0097(13) 0.0017(16) -0.0164(16)
C28 0.0303(15) 0.0262(14) 0.0222(13) 0.0032(11) 0.0019(12) -0.0017(12)
C29 0.0323(17) 0.0349(15) 0.0319(15) 0.0026(13) 0.0048(13) 0.0004(13)
C30 0.0441(18) 0.0256(14) 0.0319(16) 0.0081(12) 0.0066(14) -0.0001(14)
C31 0.0397(18) 0.0437(18) 0.0220(14) 0.0061(13) 0.0048(13) -0.0082(15)
C32 0.0332(16) 0.0218(13) 0.0315(15) -0.0037(12) -0.0063(13) 0.0052(12)
C33 0.0396(17) 0.0239(14) 0.0286(15) -0.0007(11) -0.0003(13) 0.0094(13)
C34 0.0444(19) 0.0289(15) 0.0369(17) -0.0071(13) -0.0120(15) 0.0110(14)
C35 0.0334(17) 0.0323(16) 0.061(2) -0.0119(16) -0.0113(17) 0.0045(14)
C36 0.0383(19) 0.046(2) 0.0448(19) -0.0070(15) 0.0040(16) -0.0035(16)
C37 0.0355(17) 0.0378(16) 0.0346(17) -0.0031(14) 0.0015(14) 0.0023(14)
C38 0.0373(16) 0.0238(13) 0.0178(13) -0.0059(10) -0.0028(12) -0.0031(12)
C39 0.0466(19) 0.0293(15) 0.0292(15) 0.0019(13) -0.0050(14) -0.0071(15)
C40 0.054(2) 0.0330(16) 0.0334(16) 0.0082(13) -0.0087(15) -0.0003(16)
C41 0.0383(18) 0.0425(17) 0.0327(15) 0.0003(13) -0.0093(15) -0.0013(15)
C42 0.0413(18) 0.0309(15) 0.0383(16) 0.0040(13) -0.0046(15) -0.0045(14)
C43 0.0421(17) 0.0242(14) 0.0263(14) 0.0050(11) -0.0051(13) -0.0017(13)
C44 0.0366(16) 0.0267(13) 0.0151(12) 0.0041(10) 0.0050(11) -0.0051(12)
C45 0.0421(19) 0.0368(17) 0.0361(17) -0.0062(14) 0.0068(15) -0.0064(15)
C46 0.051(2) 0.048(2) 0.0377(18) -0.0101(15) 0.0064(16) 0.0085(17)
C47 0.0355(17) 0.061(2) 0.0235(14) 0.0004(15) 0.0075(13) 0.0004(16)
C48 0.0388(17) 0.0484(18) 0.0313(15) 0.0026(13) 0.0015(16) -0.0098(17)
C49 0.0429(18) 0.0309(15) 0.0256(15) 0.0007(12) 0.0012(13) -0.0056(14)
C50 0.0296(14) 0.0187(12) 0.0313(15) 0.0011(11) 0.0021(13) 0.0038(11)
C51 0.0348(17) 0.0346(16) 0.0331(16) 0.0020(13) 0.0007(14) -0.0002(14)
C52 0.0337(17) 0.0425(18) 0.0398(19) -0.0056(14) -0.0013(14) -0.0019(15)
C53 0.0360(18) 0.0337(16) 0.0443(19) -0.0014(14) 0.0144(15) -0.0015(14)
C54 0.0415(18) 0.0291(15) 0.0311(16) -0.0007(13) 0.0103(14) 0.0028(14)
C55 0.0352(16) 0.0204(13) 0.0276(14) -0.0018(11) 0.0003(13) 0.0045(12)
C81 0.053(2) 0.0368(18) 0.043(2) 0.0017(15) -0.0029(17) 0.0072(16)
C82 0.046(2) 0.0411(18) 0.0312(16) 0.0029(14) -0.0065(15) 0.0082(16)
C83 0.048(2) 0.0408(18) 0.0323(17) -0.0022(14) 0.0017(15) -0.0018(16)
C84 0.056(2) 0.0330(16) 0.0299(16) 0.0033(13) -0.0052(15) -0.0024(16)
C85 0.054(2) 0.0406(19) 0.0420(19) 0.0061(16) -0.0067(17) 0.0012(17)

_geom_special_details
;
 All esds (except the esd in the dihedral angle between two l.s. planes)
 are estimated using the full covariance matrix.  The cell esds are taken
 into account individually in the estimation of esds in distances, angles
 and torsion angles; correlations between esds in cell parameters are only
 used when they are defined by crystal symmetry.  An approximate (isotropic)
 treatment of cell esds is used for estimating esds involving l.s. planes.
;

loop_
_geom_bond_atom_site_label_1
_geom_bond_atom_site_label_2
_geom_bond_distance
_geom_bond_site_symmetry_2
_geom_bond_publ_flag
Br1 Ni 2.3073(5) . ?
Ni N1 1.937(2) . ?
Ni P2 2.1921(8) . ?
Ni P1 2.1940(8) . ?
P1 C14 1.812(3) . ?
P1 C16 1.863(3) . ?
P1 C19 1.874(3) . ?
P2 C15 1.823(3) . ?
P2 C23 1.864(3) . ?
P2 C20 1.869(3) . ?
N1 C2 1.391(4) . ?
N1 C13 1.400(4) . ?
C2 C3 1.409(4) . ?
C2 C7 1.413(4) . ?
C3 C4 1.386(4) . ?
C3 C15 1.506(4) . ?
C4 C5 1.424(4) . ?
C4 H4 0.9500 . ?
C5 C6 1.376(4) . ?
C5 C24 1.538(4) . ?
C6 C7 1.396(4) . ?
C6 H6 0.9500 . ?
C7 C8 1.433(4) . ?
C8 C9 1.395(4) . ?
C8 C13 1.418(4) . ?
C9 C10 1.386(4) . ?
C9 H9 0.9500 . ?
C10 C11 1.411(4) . ?
C10 C28 1.530(4) . ?
C11 C12 1.392(4) . ?
C11 H11 0.9500 . ?
C12 C13 1.407(4) . ?
C12 C14 1.506(4) . ?
C14 H14A 0.9900 . ?
C14 H14B 0.9900 . ?
C15 H15A 0.9900 . ?
C15 H15B 0.9900 . ?
C16 C32 1.518(4) . ?
C16 C17 1.541(4) . ?
C16 H16 1.0000 . ?
C17 C18 1.534(5) . ?
C17 H17A 0.9900 . ?
C17 H17B 0.9900 . ?
C18 C19 1.540(4) . ?
C18 H18A 0.9900 . ?
C18 H18B 0.9900 . ?
C19 C38 1.504(4) . ?
C19 H19 1.0000 . ?
C20 C44 1.515(4) . ?
C20 C21 1.537(4) . ?
C20 H20 1.0000 . ?
C21 C22 1.522(4) . ?
C21 H21A 0.9900 . ?
C21 H21B 0.9900 . ?
C22 C23 1.548(4) . ?
C22 H22A 0.9900 . ?
C22 H22B 0.9900 . ?
C23 C50 1.502(4) . ?
C23 H23 1.0000 . ?
C24 C25 1.538(4) . ?
C24 C27 1.538(5) . ?
C24 C26 1.543(5) . ?
C25 H25A 0.9800 . ?
C25 H25B 0.9800 . ?
C25 H25C 0.9800 . ?
C26 H26A 0.9800 . ?
C26 H26B 0.9800 . ?
C26 H26C 0.9800 . ?
C27 H27A 0.9800 . ?
C27 H27B 0.9800 . ?
C27 H27C 0.9800 . ?
C28 C31 1.538(4) . ?
C28 C29 1.539(4) . ?
C28 C30 1.548(4) . ?
C29 H29A 0.9800 . ?
C29 H29B 0.9800 . ?
C29 H29C 0.9800 . ?
C30 H30A 0.9800 . ?
C30 H30B 0.9800 . ?
C30 H30C 0.9800 . ?
C31 H31A 0.9800 . ?
C31 H31B 0.9800 . ?
C31 H31C 0.9800 . ?
C32 C37 1.386(5) . ?
C32 C33 1.397(4) . ?
C33 C34 1.386(5) . ?
C33 H33 0.9500 . ?
C34 C35 1.381(6) . ?
C34 H34 0.9500 . ?
C35 C36 1.396(5) . ?
C35 H35 0.9500 . ?
C36 C37 1.375(5) . ?
C36 H36 0.9500 . ?
C37 H37 0.9500 . ?
C38 C43 1.395(4) . ?
C38 C39 1.396(4) . ?
C39 C40 1.389(5) . ?
C39 H39 0.9500 . ?
C40 C41 1.378(5) . ?
C40 H40 0.9500 . ?
C41 C42 1.382(5) . ?
C41 H41 0.9500 . ?
C42 C43 1.393(5) . ?
C42 H42 0.9500 . ?
C43 H43 0.9500 . ?
C44 C45 1.383(5) . ?
C44 C49 1.386(4) . ?
C45 C46 1.380(5) . ?
C45 H45 0.9500 . ?
C46 C47 1.387(6) . ?
C46 H46 0.9500 . ?
C47 C48 1.367(5) . ?
C47 H47 0.9500 . ?
C48 C49 1.392(5) . ?
C48 H48 0.9500 . ?
C49 H49 0.9500 . ?
C50 C51 1.395(5) . ?
C50 C55 1.399(4) . ?
C51 C52 1.383(5) . ?
C51 H51 0.9500 . ?
C52 C53 1.397(5) . ?
C52 H52 0.9500 . ?
C53 C54 1.385(5) . ?
C53 H53 0.9500 . ?
C54 C55 1.392(5) . ?
C54 H54 0.9500 . ?
C55 H55 0.9500 . ?
C81 C82 1.514(5) . ?
C81 H81A 0.9800 . ?
C81 H81B 0.9800 . ?
C81 H81C 0.9800 . ?
C82 C83 1.521(5) . ?
C82 H82A 0.9900 . ?
C82 H82B 0.9900 . ?
C83 C84 1.527(5) . ?
C83 H83A 0.9900 . ?
C83 H83B 0.9900 . ?
C84 C85 1.512(6) . ?
C84 H84A 0.9900 . ?
C84 H84B 0.9900 . ?
C85 H85A 0.9800 . ?
C85 H85B 0.9800 . ?
C85 H85C 0.9800 . ?

loop_
_geom_angle_atom_site_label_1
_geom_angle_atom_site_label_2
_geom_angle_atom_site_label_3
_geom_angle
_geom_angle_site_symmetry_1
_geom_angle_site_symmetry_3
_geom_angle_publ_flag
N1 Ni P2 88.76(7) . . ?
N1 Ni P1 89.42(6) . . ?
P2 Ni P1 175.61(4) . . ?
N1 Ni Br1 177.75(8) . . ?
P2 Ni Br1 91.24(2) . . ?
P1 Ni Br1 90.73(2) . . ?
C14 P1 C16 107.54(14) . . ?
C14 P1 C19 102.94(14) . . ?
C16 P1 C19 95.48(13) . . ?
C14 P1 Ni 106.61(10) . . ?
C16 P1 Ni 112.93(10) . . ?
C19 P1 Ni 129.47(10) . . ?
C15 P2 C23 106.09(13) . . ?
C15 P2 C20 104.46(14) . . ?
C23 P2 C20 96.03(13) . . ?
C15 P2 Ni 105.89(9) . . ?
C23 P2 Ni 115.75(10) . . ?
C20 P2 Ni 126.72(9) . . ?
C2 N1 C13 105.4(2) . . ?
C2 N1 Ni 127.89(18) . . ?
C13 N1 Ni 126.65(18) . . ?
N1 C2 C3 131.0(2) . . ?
N1 C2 C7 111.4(2) . . ?
C3 C2 C7 117.5(3) . . ?
C4 C3 C2 118.7(3) . . ?
C4 C3 C15 119.6(3) . . ?
C2 C3 C15 121.7(3) . . ?
C3 C4 C5 123.8(3) . . ?
C3 C4 H4 118.1 . . ?
C5 C4 H4 118.1 . . ?
C6 C5 C4 116.8(3) . . ?
C6 C5 C24 123.8(3) . . ?
C4 C5 C24 119.3(3) . . ?
C5 C6 C7 120.5(3) . . ?
C5 C6 H6 119.8 . . ?
C7 C6 H6 119.8 . . ?
C6 C7 C2 122.6(3) . . ?
C6 C7 C8 131.2(2) . . ?
C2 C7 C8 106.2(2) . . ?
C9 C8 C13 122.6(3) . . ?
C9 C8 C7 131.3(3) . . ?
C13 C8 C7 106.1(2) . . ?
C10 C9 C8 119.9(3) . . ?
C10 C9 H9 120.0 . . ?
C8 C9 H9 120.0 . . ?
C9 C10 C11 117.2(3) . . ?
C9 C10 C28 123.0(3) . . ?
C11 C10 C28 119.7(3) . . ?
C12 C11 C10 124.2(3) . . ?
C12 C11 H11 117.9 . . ?
C10 C11 H11 117.9 . . ?
C11 C12 C13 118.2(3) . . ?
C11 C12 C14 118.9(3) . . ?
C13 C12 C14 122.9(3) . . ?
N1 C13 C12 131.1(2) . . ?
N1 C13 C8 111.0(2) . . ?
C12 C13 C8 117.9(3) . . ?
C12 C14 P1 111.4(2) . . ?
C12 C14 H14A 109.3 . . ?
P1 C14 H14A 109.3 . . ?
C12 C14 H14B 109.3 . . ?
P1 C14 H14B 109.3 . . ?
H14A C14 H14B 108.0 . . ?
C3 C15 P2 108.4(2) . . ?
C3 C15 H15A 110.0 . . ?
P2 C15 H15A 110.0 . . ?
C3 C15 H15B 110.0 . . ?
P2 C15 H15B 110.0 . . ?
H15A C15 H15B 108.4 . . ?
C32 C16 C17 114.8(3) . . ?
C32 C16 P1 113.8(2) . . ?
C17 C16 P1 105.2(2) . . ?
C32 C16 H16 107.6 . . ?
C17 C16 H16 107.6 . . ?
P1 C16 H16 107.6 . . ?
C18 C17 C16 107.5(3) . . ?
C18 C17 H17A 110.2 . . ?
C16 C17 H17A 110.2 . . ?
C18 C17 H17B 110.2 . . ?
C16 C17 H17B 110.2 . . ?
H17A C17 H17B 108.5 . . ?
C17 C18 C19 107.7(3) . . ?
C17 C18 H18A 110.2 . . ?
C19 C18 H18A 110.2 . . ?
C17 C18 H18B 110.2 . . ?
C19 C18 H18B 110.2 . . ?
H18A C18 H18B 108.5 . . ?
C38 C19 C18 115.4(3) . . ?
C38 C19 P1 116.2(2) . . ?
C18 C19 P1 102.51(19) . . ?
C38 C19 H19 107.4 . . ?
C18 C19 H19 107.4 . . ?
P1 C19 H19 107.4 . . ?
C44 C20 C21 117.1(2) . . ?
C44 C20 P2 113.0(2) . . ?
C21 C20 P2 102.84(19) . . ?
C44 C20 H20 107.8 . . ?
C21 C20 H20 107.8 . . ?
P2 C20 H20 107.8 . . ?
C22 C21 C20 108.2(2) . . ?
C22 C21 H21A 110.1 . . ?
C20 C21 H21A 110.1 . . ?
C22 C21 H21B 110.1 . . ?
C20 C21 H21B 110.1 . . ?
H21A C21 H21B 108.4 . . ?
C21 C22 C23 106.7(2) . . ?
C21 C22 H22A 110.4 . . ?
C23 C22 H22A 110.4 . . ?
C21 C22 H22B 110.4 . . ?
C23 C22 H22B 110.4 . . ?
H22A C22 H22B 108.6 . . ?
C50 C23 C22 115.9(3) . . ?
C50 C23 P2 113.95(19) . . ?
C22 C23 P2 103.2(2) . . ?
C50 C23 H23 107.8 . . ?
C22 C23 H23 107.8 . . ?
P2 C23 H23 107.8 . . ?
C5 C24 C25 111.5(3) . . ?
C5 C24 C27 110.4(3) . . ?
C25 C24 C27 108.4(3) . . ?
C5 C24 C26 109.0(3) . . ?
C25 C24 C26 108.0(3) . . ?
C27 C24 C26 109.4(3) . . ?
C24 C25 H25A 109.5 . . ?
C24 C25 H25B 109.5 . . ?
H25A C25 H25B 109.5 . . ?
C24 C25 H25C 109.5 . . ?
H25A C25 H25C 109.5 . . ?
H25B C25 H25C 109.5 . . ?
C24 C26 H26A 109.5 . . ?
C24 C26 H26B 109.5 . . ?
H26A C26 H26B 109.5 . . ?
C24 C26 H26C 109.5 . . ?
H26A C26 H26C 109.5 . . ?
H26B C26 H26C 109.5 . . ?
C24 C27 H27A 109.5 . . ?
C24 C27 H27B 109.5 . . ?
H27A C27 H27B 109.5 . . ?
C24 C27 H27C 109.5 . . ?
H27A C27 H27C 109.5 . . ?
H27B C27 H27C 109.5 . . ?
C10 C28 C31 112.0(3) . . ?
C10 C28 C29 109.3(2) . . ?
C31 C28 C29 108.8(3) . . ?
C10 C28 C30 110.3(2) . . ?
C31 C28 C30 107.7(3) . . ?
C29 C28 C30 108.7(3) . . ?
C28 C29 H29A 109.5 . . ?
C28 C29 H29B 109.5 . . ?
H29A C29 H29B 109.5 . . ?
C28 C29 H29C 109.5 . . ?
H29A C29 H29C 109.5 . . ?
H29B C29 H29C 109.5 . . ?
C28 C30 H30A 109.5 . . ?
C28 C30 H30B 109.5 . . ?
H30A C30 H30B 109.5 . . ?
C28 C30 H30C 109.5 . . ?
H30A C30 H30C 109.5 . . ?
H30B C30 H30C 109.5 . . ?
C28 C31 H31A 109.5 . . ?
C28 C31 H31B 109.5 . . ?
H31A C31 H31B 109.5 . . ?
C28 C31 H31C 109.5 . . ?
H31A C31 H31C 109.5 . . ?
H31B C31 H31C 109.5 . . ?
C37 C32 C33 118.5(3) . . ?
C37 C32 C16 121.9(3) . . ?
C33 C32 C16 119.6(3) . . ?
C34 C33 C32 120.1(3) . . ?
C34 C33 H33 119.9 . . ?
C32 C33 H33 119.9 . . ?
C35 C34 C33 120.9(3) . . ?
C35 C34 H34 119.5 . . ?
C33 C34 H34 119.5 . . ?
C34 C35 C36 118.9(3) . . ?
C34 C35 H35 120.6 . . ?
C36 C35 H35 120.6 . . ?
C37 C36 C35 120.2(4) . . ?
C37 C36 H36 119.9 . . ?
C35 C36 H36 119.9 . . ?
C36 C37 C32 121.3(3) . . ?
C36 C37 H37 119.3 . . ?
C32 C37 H37 119.3 . . ?
C43 C38 C39 117.4(3) . . ?
C43 C38 C19 121.8(3) . . ?
C39 C38 C19 120.8(3) . . ?
C40 C39 C38 121.0(3) . . ?
C40 C39 H39 119.5 . . ?
C38 C39 H39 119.5 . . ?
C41 C40 C39 120.9(3) . . ?
C41 C40 H40 119.6 . . ?
C39 C40 H40 119.6 . . ?
C40 C41 C42 119.2(3) . . ?
C40 C41 H41 120.4 . . ?
C42 C41 H41 120.4 . . ?
C41 C42 C43 120.1(3) . . ?
C41 C42 H42 120.0 . . ?
C43 C42 H42 120.0 . . ?
C42 C43 C38 121.5(3) . . ?
C42 C43 H43 119.2 . . ?
C38 C43 H43 119.2 . . ?
C45 C44 C49 118.0(3) . . ?
C45 C44 C20 120.4(3) . . ?
C49 C44 C20 121.7(3) . . ?
C46 C45 C44 120.8(3) . . ?
C46 C45 H45 119.6 . . ?
C44 C45 H45 119.6 . . ?
C45 C46 C47 120.9(3) . . ?
C45 C46 H46 119.6 . . ?
C47 C46 H46 119.6 . . ?
C48 C47 C46 118.8(3) . . ?
C48 C47 H47 120.6 . . ?
C46 C47 H47 120.6 . . ?
C47 C48 C49 120.4(3) . . ?
C47 C48 H48 119.8 . . ?
C49 C48 H48 119.8 . . ?
C44 C49 C48 121.1(3) . . ?
C44 C49 H49 119.4 . . ?
C48 C49 H49 119.4 . . ?
C51 C50 C55 117.9(3) . . ?
C51 C50 C23 121.9(3) . . ?
C55 C50 C23 120.2(3) . . ?
C52 C51 C50 121.5(3) . . ?
C52 C51 H51 119.3 . . ?
C50 C51 H51 119.3 . . ?
C51 C52 C53 120.0(3) . . ?
C51 C52 H52 120.0 . . ?
C53 C52 H52 120.0 . . ?
C54 C53 C52 119.4(3) . . ?
C54 C53 H53 120.3 . . ?
C52 C53 H53 120.3 . . ?
C53 C54 C55 120.2(3) . . ?
C53 C54 H54 119.9 . . ?
C55 C54 H54 119.9 . . ?
C54 C55 C50 121.0(3) . . ?
C54 C55 H55 119.5 . . ?
C50 C55 H55 119.5 . . ?
C82 C81 H81A 109.5 . . ?
C82 C81 H81B 109.5 . . ?
H81A C81 H81B 109.5 . . ?
C82 C81 H81C 109.5 . . ?
H81A C81 H81C 109.5 . . ?
H81B C81 H81C 109.5 . . ?
C81 C82 C83 113.4(3) . . ?
C81 C82 H82A 108.9 . . ?
C83 C82 H82A 108.9 . . ?
C81 C82 H82B 108.9 . . ?
C83 C82 H82B 108.9 . . ?
H82A C82 H82B 107.7 . . ?
C82 C83 C84 115.2(3) . . ?
C82 C83 H83A 108.5 . . ?
C84 C83 H83A 108.5 . . ?
C82 C83 H83B 108.5 . . ?
C84 C83 H83B 108.5 . . ?
H83A C83 H83B 107.5 . . ?
C85 C84 C83 113.4(3) . . ?
C85 C84 H84A 108.9 . . ?
C83 C84 H84A 108.9 . . ?
C85 C84 H84B 108.9 . . ?
C83 C84 H84B 108.9 . . ?
H84A C84 H84B 107.7 . . ?
C84 C85 H85A 109.5 . . ?
C84 C85 H85B 109.5 . . ?
H85A C85 H85B 109.5 . . ?
C84 C85 H85C 109.5 . . ?
H85A C85 H85C 109.5 . . ?
H85B C85 H85C 109.5 . . ?

loop_
_geom_torsion_atom_site_label_1
_geom_torsion_atom_site_label_2
_geom_torsion_atom_site_label_3
_geom_torsion_atom_site_label_4
_geom_torsion
_geom_torsion_site_symmetry_1
_geom_torsion_site_symmetry_2
_geom_torsion_site_symmetry_3
_geom_torsion_site_symmetry_4
_geom_torsion_publ_flag
N1 Ni P1 C14 52.75(13) . . . . ?
P2 Ni P1 C14 118.3(4) . . . . ?
Br1 Ni P1 C14 -125.01(10) . . . . ?
N1 Ni P1 C16 -65.14(13) . . . . ?
P2 Ni P1 C16 0.4(5) . . . . ?
Br1 Ni P1 C16 117.10(11) . . . . ?
N1 Ni P1 C19 176.01(16) . . . . ?
P2 Ni P1 C19 -118.5(4) . . . . ?
Br1 Ni P1 C19 -1.75(14) . . . . ?
N1 Ni P2 C15 52.87(12) . . . . ?
P1 Ni P2 C15 -12.7(5) . . . . ?
Br1 Ni P2 C15 -129.38(10) . . . . ?
N1 Ni P2 C23 -64.35(13) . . . . ?
P1 Ni P2 C23 -129.9(4) . . . . ?
Br1 Ni P2 C23 113.40(10) . . . . ?
N1 Ni P2 C20 175.29(15) . . . . ?
P1 Ni P2 C20 109.7(4) . . . . ?
Br1 Ni P2 C20 -6.95(13) . . . . ?
P2 Ni N1 C2 -24.2(2) . . . . ?
P1 Ni N1 C2 151.8(2) . . . . ?
Br1 Ni N1 C2 -114.3(17) . . . . ?
P2 Ni N1 C13 151.4(2) . . . . ?
P1 Ni N1 C13 -32.5(2) . . . . ?
Br1 Ni N1 C13 61.3(18) . . . . ?
C13 N1 C2 C3 179.2(3) . . . . ?
Ni N1 C2 C3 -4.4(4) . . . . ?
C13 N1 C2 C7 -1.4(3) . . . . ?
Ni N1 C2 C7 174.97(18) . . . . ?
N1 C2 C3 C4 179.0(3) . . . . ?
C7 C2 C3 C4 -0.3(4) . . . . ?
N1 C2 C3 C15 0.5(5) . . . . ?
C7 C2 C3 C15 -178.9(3) . . . . ?
C2 C3 C4 C5 0.5(4) . . . . ?
C15 C3 C4 C5 179.0(3) . . . . ?
C3 C4 C5 C6 -1.0(4) . . . . ?
C3 C4 C5 C24 175.6(3) . . . . ?
C4 C5 C6 C7 1.4(4) . . . . ?
C24 C5 C6 C7 -175.0(3) . . . . ?
C5 C6 C7 C2 -1.4(4) . . . . ?
C5 C6 C7 C8 178.8(3) . . . . ?
N1 C2 C7 C6 -178.7(3) . . . . ?
C3 C2 C7 C6 0.8(4) . . . . ?
N1 C2 C7 C8 1.2(3) . . . . ?
C3 C2 C7 C8 -179.3(2) . . . . ?
C6 C7 C8 C9 -3.2(5) . . . . ?
C2 C7 C8 C9 176.9(3) . . . . ?
C6 C7 C8 C13 179.4(3) . . . . ?
C2 C7 C8 C13 -0.4(3) . . . . ?
C13 C8 C9 C10 1.5(4) . . . . ?
C7 C8 C9 C10 -175.5(3) . . . . ?
C8 C9 C10 C11 -1.4(4) . . . . ?
C8 C9 C10 C28 178.4(3) . . . . ?
C9 C10 C11 C12 0.4(5) . . . . ?
C28 C10 C11 C12 -179.4(3) . . . . ?
C10 C11 C12 C13 0.6(5) . . . . ?
C10 C11 C12 C14 178.9(3) . . . . ?
C2 N1 C13 C12 -176.1(3) . . . . ?
Ni N1 C13 C12 7.5(4) . . . . ?
C2 N1 C13 C8 1.1(3) . . . . ?
Ni N1 C13 C8 -175.32(18) . . . . ?
C11 C12 C13 N1 176.5(3) . . . . ?
C14 C12 C13 N1 -1.7(5) . . . . ?
C11 C12 C13 C8 -0.5(4) . . . . ?
C14 C12 C13 C8 -178.8(3) . . . . ?
C9 C8 C13 N1 -178.1(3) . . . . ?
C7 C8 C13 N1 -0.4(3) . . . . ?
C9 C8 C13 C12 -0.5(4) . . . . ?
C7 C8 C13 C12 177.2(2) . . . . ?
C11 C12 C14 P1 -145.8(2) . . . . ?
C13 C12 C14 P1 32.5(4) . . . . ?
C16 P1 C14 C12 61.2(2) . . . . ?
C19 P1 C14 C12 161.3(2) . . . . ?
Ni P1 C14 C12 -60.1(2) . . . . ?
C4 C3 C15 P2 -139.7(2) . . . . ?
C2 C3 C15 P2 38.8(3) . . . . ?
C23 P2 C15 C3 56.6(2) . . . . ?
C20 P2 C15 C3 157.45(19) . . . . ?
Ni P2 C15 C3 -66.88(19) . . . . ?
C14 P1 C16 C32 -121.2(2) . . . . ?
C19 P1 C16 C32 133.4(2) . . . . ?
Ni P1 C16 C32 -3.8(2) . . . . ?
C14 P1 C16 C17 112.4(2) . . . . ?
C19 P1 C16 C17 6.9(2) . . . . ?
Ni P1 C16 C17 -130.3(2) . . . . ?
C32 C16 C17 C18 -158.4(3) . . . . ?
P1 C16 C17 C18 -32.6(3) . . . . ?
C16 C17 C18 C19 50.6(3) . . . . ?
C17 C18 C19 C38 -169.6(3) . . . . ?
C17 C18 C19 P1 -42.3(3) . . . . ?
C14 P1 C19 C38 37.2(2) . . . . ?
C16 P1 C19 C38 146.7(2) . . . . ?
Ni P1 C19 C38 -87.5(2) . . . . ?
C14 P1 C19 C18 -89.6(2) . . . . ?
C16 P1 C19 C18 19.9(2) . . . . ?
Ni P1 C19 C18 145.74(17) . . . . ?
C15 P2 C20 C44 31.8(2) . . . . ?
C23 P2 C20 C44 140.2(2) . . . . ?
Ni P2 C20 C44 -91.2(2) . . . . ?
C15 P2 C20 C21 -95.3(2) . . . . ?
C23 P2 C20 C21 13.1(2) . . . . ?
Ni P2 C20 C21 141.66(17) . . . . ?
C44 C20 C21 C22 -163.2(3) . . . . ?
P2 C20 C21 C22 -38.7(3) . . . . ?
C20 C21 C22 C23 53.0(3) . . . . ?
C21 C22 C23 C50 -164.6(3) . . . . ?
C21 C22 C23 P2 -39.3(3) . . . . ?
C15 P2 C23 C50 -111.8(2) . . . . ?
C20 P2 C23 C50 141.3(2) . . . . ?
Ni P2 C23 C50 5.3(2) . . . . ?
C15 P2 C23 C22 121.6(2) . . . . ?
C20 P2 C23 C22 14.7(2) . . . . ?
Ni P2 C23 C22 -121.27(18) . . . . ?
C6 C5 C24 C25 -6.2(4) . . . . ?
C4 C5 C24 C25 177.4(3) . . . . ?
C6 C5 C24 C27 -126.8(3) . . . . ?
C4 C5 C24 C27 56.8(4) . . . . ?
C6 C5 C24 C26 112.9(4) . . . . ?
C4 C5 C24 C26 -63.4(4) . . . . ?
C9 C10 C28 C31 -4.4(4) . . . . ?
C11 C10 C28 C31 175.3(3) . . . . ?
C9 C10 C28 C29 116.2(3) . . . . ?
C11 C10 C28 C29 -64.1(4) . . . . ?
C9 C10 C28 C30 -124.3(3) . . . . ?
C11 C10 C28 C30 55.4(4) . . . . ?
C17 C16 C32 C37 42.9(4) . . . . ?
P1 C16 C32 C37 -78.3(3) . . . . ?
C17 C16 C32 C33 -139.1(3) . . . . ?
P1 C16 C32 C33 99.7(3) . . . . ?
C37 C32 C33 C34 -1.6(5) . . . . ?
C16 C32 C33 C34 -179.6(3) . . . . ?
C32 C33 C34 C35 -0.8(5) . . . . ?
C33 C34 C35 C36 1.6(5) . . . . ?
C34 C35 C36 C37 0.1(5) . . . . ?
C35 C36 C37 C32 -2.6(5) . . . . ?
C33 C32 C37 C36 3.3(5) . . . . ?
C16 C32 C37 C36 -178.7(3) . . . . ?
C18 C19 C38 C43 20.9(4) . . . . ?
P1 C19 C38 C43 -99.2(3) . . . . ?
C18 C19 C38 C39 -155.4(3) . . . . ?
P1 C19 C38 C39 84.5(3) . . . . ?
C43 C38 C39 C40 -0.9(5) . . . . ?
C19 C38 C39 C40 175.6(3) . . . . ?
C38 C39 C40 C41 -0.4(5) . . . . ?
C39 C40 C41 C42 1.3(5) . . . . ?
C40 C41 C42 C43 -0.9(5) . . . . ?
C41 C42 C43 C38 -0.4(5) . . . . ?
C39 C38 C43 C42 1.3(5) . . . . ?
C19 C38 C43 C42 -175.2(3) . . . . ?
C21 C20 C44 C45 -174.4(3) . . . . ?
P2 C20 C44 C45 66.4(3) . . . . ?
C21 C20 C44 C49 5.9(4) . . . . ?
P2 C20 C44 C49 -113.4(3) . . . . ?
C49 C44 C45 C46 -0.4(5) . . . . ?
C20 C44 C45 C46 179.8(3) . . . . ?
C44 C45 C46 C47 -0.1(6) . . . . ?
C45 C46 C47 C48 0.3(6) . . . . ?
C46 C47 C48 C49 0.0(5) . . . . ?
C45 C44 C49 C48 0.7(5) . . . . ?
C20 C44 C49 C48 -179.5(3) . . . . ?
C47 C48 C49 C44 -0.5(5) . . . . ?
C22 C23 C50 C51 47.8(4) . . . . ?
P2 C23 C50 C51 -71.8(3) . . . . ?
C22 C23 C50 C55 -133.1(3) . . . . ?
P2 C23 C50 C55 107.3(3) . . . . ?
C55 C50 C51 C52 0.5(5) . . . . ?
C23 C50 C51 C52 179.7(3) . . . . ?
C50 C51 C52 C53 -0.8(5) . . . . ?
C51 C52 C53 C54 0.2(5) . . . . ?
C52 C53 C54 C55 0.7(5) . . . . ?
C53 C54 C55 C50 -1.0(5) . . . . ?
C51 C50 C55 C54 0.4(4) . . . . ?
C23 C50 C55 C54 -178.8(3) . . . . ?
C81 C82 C83 C84 -64.0(4) . . . . ?
C82 C83 C84 C85 -68.8(4) . . . . ?

_diffrn_measured_fraction_theta_max 0.980
_diffrn_reflns_theta_full        73.51
_diffrn_measured_fraction_theta_full 0.980
_refine_diff_density_max         0.860
_refine_diff_density_min         -0.603
_refine_diff_density_rms         0.077
_cell_oxdiff_length_a            10.0851(6)
_cell_oxdiff_length_b            20.0112(7)
_cell_oxdiff_length_c            25.1240(8)
_cell_oxdiff_angle_alpha         90.042(3)
_cell_oxdiff_angle_beta          90.017(4)
_cell_oxdiff_angle_gamma         90.022(4)
_cell_oxdiff_volume              5070.4(4)
_cell_oxdiff_measurement_reflns_used 21103
loop_
_exptl_crystal_face_index_h
_exptl_crystal_face_index_k
_exptl_crystal_face_index_l
_exptl_crystal_face_perp_dist
_exptl_oxdiff_crystal_face_indexfrac_h
_exptl_oxdiff_crystal_face_indexfrac_k
_exptl_oxdiff_crystal_face_indexfrac_l
_exptl_oxdiff_crystal_face_x
_exptl_oxdiff_crystal_face_y
_exptl_oxdiff_crystal_face_z
-4 7 -9 0.0354 -3.9974 7.0238 -8.9835 0.0679 -0.3199 0.9281
4 -7 10 0.0305 3.9980 -7.0243 9.9849 -0.0292 0.3037 -0.9730
5 5 -9 0.1635 4.9992 4.9790 -9.0384 -0.0441 0.9444 0.3781
-5 -5 9 0.1713 -4.9992 -4.9790 9.0384 0.0441 -0.9444 -0.3781
-1 -10 -10 0.0166 -1.0166 -9.9904 -10.0142 -0.9859 -0.1405 0.0424
1 10 10 0.0166 1.0166 9.9904 10.0142 0.9859 0.1405 -0.0424
-5 -4 9 0.1590 -4.9981 -3.9790 9.0391 0.1040 -0.9286 -0.3324
_diffrn_orient_matrix_UB_11      0.0013910000
_diffrn_orient_matrix_UB_12      0.0598372000
_diffrn_orient_matrix_UB_13      0.0386118000
_diffrn_orient_matrix_UB_21      0.1439934000
_diffrn_orient_matrix_UB_22      0.0156670000
_diffrn_orient_matrix_UB_23      -0.0162178000
_diffrn_orient_matrix_UB_31      -0.0509901000
_diffrn_orient_matrix_UB_32      0.0458380000
_diffrn_orient_matrix_UB_33      -0.0447887000
_diffrn_measurement_details
;
#__ type_ start__ end____ width___ exp.time_
  1 omega  -68.00   21.00   1.0000    5.0000
omega____ theta____ kappa____ phi______ frames
    -        0.0000  -57.0000   30.0000 89

#__ type_ start__ end____ width___ exp.time_
  2 omega  -68.00  -42.00   1.0000    5.0000
omega____ theta____ kappa____ phi______ frames
    -        0.0000  -57.0000   86.0000 26

#__ type_ start__ end____ width___ exp.time_
  3 omega    1.00   34.00   1.0000    5.0000
omega____ theta____ kappa____ phi______ frames
    -        0.0000   57.0000  -90.0000 33

#__ type_ start__ end____ width___ exp.time_
  4 omega  -52.00   -6.00   1.0000    5.0000
omega____ theta____ kappa____ phi______ frames
    -        0.0000  -57.0000  150.0000 46

#__ type_ start__ end____ width___ exp.time_
  5 omega   -6.00   69.00   1.0000    5.0000
omega____ theta____ kappa____ phi______ frames
    -        0.0000   57.0000 -180.0000 75

#__ type_ start__ end____ width___ exp.time_
  6 omega  -17.00   44.00   1.0000    5.0000
omega____ theta____ kappa____ phi______ frames
    -       10.0000   80.0000  -32.0000 61

#__ type_ start__ end____ width___ exp.time_
  7 omega   -6.00   19.00   1.0000    5.0000
omega____ theta____ kappa____ phi______ frames
    -       26.0000   80.0000  112.0000 25

#__ type_ start__ end____ width___ exp.time_
  8 omega    3.00   28.00   1.0000   10.0000
omega____ theta____ kappa____ phi______ frames
    -       34.0000   78.0000  176.0000 25

#__ type_ start__ end____ width___ exp.time_
  9 omega    7.00   32.00   1.0000   10.0000
omega____ theta____ kappa____ phi______ frames
    -       38.0000   79.0000  103.0000 25

#__ type_ start__ end____ width___ exp.time_
 10 omega   11.00   36.00   1.0000   10.0000
omega____ theta____ kappa____ phi______ frames
    -       42.0000   78.0000  -69.0000 25

#__ type_ start__ end____ width___ exp.time_
 11 omega   12.00   37.00   1.0000   10.0000
omega____ theta____ kappa____ phi______ frames
    -       42.0000   80.0000  105.0000 25

#__ type_ start__ end____ width___ exp.time_
 12 omega   11.00   37.00   1.0000   10.0000
omega____ theta____ kappa____ phi______ frames
    -       42.0000   80.0000  134.0000 26

#__ type_ start__ end____ width___ exp.time_
 13 omega  -72.00   24.00   1.0000   10.0000
omega____ theta____ kappa____ phi______ frames
    -      -42.5000   77.0000 -180.0000 96

#__ type_ start__ end____ width___ exp.time_
 14 omega  -51.00   30.00   1.0000   10.0000
omega____ theta____ kappa____ phi______ frames
    -      -42.5000   25.0000  150.0000 81

#__ type_ start__ end____ width___ exp.time_
 15 omega  -44.00  -17.00   1.0000   10.0000
omega____ theta____ kappa____ phi______ frames
    -      -42.5000  -77.0000  120.0000 27

#__ type_ start__ end____ width___ exp.time_
 16 omega  -39.00  -12.00   1.0000   10.0000
omega____ theta____ kappa____ phi______ frames
    -      -42.5000  -77.0000   90.0000 27

#__ type_ start__ end____ width___ exp.time_
 17 omega   14.00   42.00   1.0000   10.0000
omega____ theta____ kappa____ phi______ frames
    -       46.0000   80.0000 -126.0000 28

#__ type_ start__ end____ width___ exp.time_
 18 omega   15.00   40.00   1.0000   10.0000
omega____ theta____ kappa____ phi______ frames
    -       46.0000   79.0000  -52.0000 25

#__ type_ start__ end____ width___ exp.time_
 19 omega   14.00   39.00   1.0000   10.0000
omega____ theta____ kappa____ phi______ frames
    -       46.0000   80.0000   35.0000 25

#__ type_ start__ end____ width___ exp.time_
 20 omega   14.00   39.00   1.0000   10.0000
omega____ theta____ kappa____ phi______ frames
    -       46.0000   80.0000 -157.0000 25

#__ type_ start__ end____ width___ exp.time_
 21 omega   15.00   40.00   1.0000   10.0000
omega____ theta____ kappa____ phi______ frames
    -       46.0000   79.0000   10.0000 25

#__ type_ start__ end____ width___ exp.time_
 22 omega   15.00   40.00   1.0000   10.0000
omega____ theta____ kappa____ phi______ frames
    -       46.0000   78.0000   75.0000 25

#__ type_ start__ end____ width___ exp.time_
 23 omega   18.00   43.00   1.0000   10.0000
omega____ theta____ kappa____ phi______ frames
    -       50.0000   80.0000  -64.0000 25

#__ type_ start__ end____ width___ exp.time_
 24 omega   19.00   44.00   1.0000   10.0000
omega____ theta____ kappa____ phi______ frames
    -       50.0000   78.0000   66.0000 25

#__ type_ start__ end____ width___ exp.time_
 25 omega   19.00   44.00   1.0000   10.0000
omega____ theta____ kappa____ phi______ frames
    -       50.0000   79.0000  124.0000 25

#__ type_ start__ end____ width___ exp.time_
 26 omega   18.00   43.00   1.0000   10.0000
omega____ theta____ kappa____ phi______ frames
    -       50.0000   80.0000  -36.0000 25

#__ type_ start__ end____ width___ exp.time_
 27 omega   19.00   44.00   1.0000   10.0000
omega____ theta____ kappa____ phi______ frames
    -       50.0000   79.0000   75.0000 25

#__ type_ start__ end____ width___ exp.time_
 28 omega   19.00   46.00   1.0000   10.0000
omega____ theta____ kappa____ phi______ frames
    -       50.0000   78.0000  -87.0000 27

#__ type_ start__ end____ width___ exp.time_
 29 omega   18.00   43.00   1.0000   10.0000
omega____ theta____ kappa____ phi______ frames
    -       50.0000   80.0000 -132.0000 25

#__ type_ start__ end____ width___ exp.time_
 30 omega   19.00   45.00   1.0000   10.0000
omega____ theta____ kappa____ phi______ frames
    -       50.0000   78.0000   35.0000 26

#__ type_ start__ end____ width___ exp.time_
 31 omega   20.00   45.00   1.0000   10.0000
omega____ theta____ kappa____ phi______ frames
    -       50.0000   78.0000  -13.0000 25

#__ type_ start__ end____ width___ exp.time_
 32 omega   27.00   54.00   1.0000   10.0000
omega____ theta____ kappa____ phi______ frames
    -       54.0000   76.0000  -35.0000 27

#__ type_ start__ end____ width___ exp.time_
 33 omega   80.00  107.00   1.0000   10.0000
omega____ theta____ kappa____ phi______ frames
    -       54.0000   76.0000  -35.0000 27

#__ type_ start__ end____ width___ exp.time_
 34 omega   23.00   48.00   1.0000   10.0000
omega____ theta____ kappa____ phi______ frames
    -       54.0000   78.0000   62.0000 25

#__ type_ start__ end____ width___ exp.time_
 35 omega   24.00   51.00   1.0000   10.0000
omega____ theta____ kappa____ phi______ frames
    -       54.0000   77.0000  121.0000 27

#__ type_ start__ end____ width___ exp.time_
 36 omega   24.00   51.00   1.0000   10.0000
omega____ theta____ kappa____ phi______ frames
    -       54.0000   77.0000 -177.0000 27

#__ type_ start__ end____ width___ exp.time_
 37 omega   25.00   52.00   1.0000   10.0000
omega____ theta____ kappa____ phi______ frames
    -       54.0000   76.0000  139.0000 27

#__ type_ start__ end____ width___ exp.time_
 38 omega   23.00   48.00   1.0000   10.0000
omega____ theta____ kappa____ phi______ frames
    -       54.0000   78.0000  -57.0000 25

#__ type_ start__ end____ width___ exp.time_
 39 omega   99.00  124.00   1.0000   10.0000
omega____ theta____ kappa____ phi______ frames
    -       54.0000   77.0000 -177.0000 25

#__ type_ start__ end____ width___ exp.time_
 40 omega   25.00   52.00   1.0000   10.0000
omega____ theta____ kappa____ phi______ frames
    -       54.0000   77.0000 -146.0000 27

#__ type_ start__ end____ width___ exp.time_
 41 omega   23.00   48.00   1.0000   10.0000
omega____ theta____ kappa____ phi______ frames
    -       54.0000   78.0000   91.0000 25

#__ type_ start__ end____ width___ exp.time_
 42 omega   23.00   48.00   1.0000   10.0000
omega____ theta____ kappa____ phi______ frames
    -       54.0000   78.0000   -2.0000 25

#__ type_ start__ end____ width___ exp.time_
 43 omega   30.00   65.00   1.0000   10.0000
omega____ theta____ kappa____ phi______ frames
    -       58.0000   73.0000  -95.0000 35

#__ type_ start__ end____ width___ exp.time_
 44 omega   28.00   55.00   1.0000   10.0000
omega____ theta____ kappa____ phi______ frames
    -       58.0000   77.0000  -90.0000 27

#__ type_ start__ end____ width___ exp.time_
 45 omega   29.00   54.00   1.0000   10.0000
omega____ theta____ kappa____ phi______ frames
    -       58.0000   77.0000   84.0000 25

#__ type_ start__ end____ width___ exp.time_
 46 omega   28.00   54.00   1.0000   10.0000
omega____ theta____ kappa____ phi______ frames
    -       58.0000   77.0000 -123.0000 26

#__ type_ start__ end____ width___ exp.time_
 47 omega   29.00   54.00   1.0000   10.0000
omega____ theta____ kappa____ phi______ frames
    -       58.0000   77.0000   94.0000 25

#__ type_ start__ end____ width___ exp.time_
 48 omega   28.00  104.00   1.0000   10.0000
omega____ theta____ kappa____ phi______ frames
    -       58.0000   77.0000 -150.0000 76

#__ type_ start__ end____ width___ exp.time_
 49 omega   28.00   55.00   1.0000   10.0000
omega____ theta____ kappa____ phi______ frames
    -       58.0000   77.0000 -169.0000 27

#__ type_ start__ end____ width___ exp.time_
 50 omega  103.00  128.00   1.0000   10.0000
omega____ theta____ kappa____ phi______ frames
    -       58.0000   75.0000  156.0000 25

#__ type_ start__ end____ width___ exp.time_
 51 omega   85.00  112.00   1.0000   10.0000
omega____ theta____ kappa____ phi______ frames
    -       58.0000   75.0000   52.0000 27

#__ type_ start__ end____ width___ exp.time_
 52 omega   30.00   57.00   1.0000   10.0000
omega____ theta____ kappa____ phi______ frames
    -       58.0000   75.0000  156.0000 27

#__ type_ start__ end____ width___ exp.time_
 53 omega   29.00   55.00   1.0000   10.0000
omega____ theta____ kappa____ phi______ frames
    -       58.0000   75.0000   52.0000 26

#__ type_ start__ end____ width___ exp.time_
 54 omega   31.00   59.00   1.0000   10.0000
omega____ theta____ kappa____ phi______ frames
    -       58.0000   73.0000  -23.0000 28

#__ type_ start__ end____ width___ exp.time_
 55 omega   35.00  114.00   1.0000   10.0000
omega____ theta____ kappa____ phi______ frames
    -       62.0000   71.0000  -30.0000 79

#__ type_ start__ end____ width___ exp.time_
 56 omega   33.00  131.00   1.0000   10.0000
omega____ theta____ kappa____ phi______ frames
    -       62.0000   75.0000  105.0000 98

#__ type_ start__ end____ width___ exp.time_
 57 omega   34.00  107.00   1.0000   10.0000
omega____ theta____ kappa____ phi______ frames
    -       62.0000   73.0000 -125.0000 73

#__ type_ start__ end____ width___ exp.time_
 58 omega   91.00  118.00   1.0000   10.0000
omega____ theta____ kappa____ phi______ frames
    -       62.0000   73.0000  -75.0000 27

#__ type_ start__ end____ width___ exp.time_
 59 omega   36.00  131.00   1.0000   10.0000
omega____ theta____ kappa____ phi______ frames
    -       62.0000   70.0000   30.0000 95

#__ type_ start__ end____ width___ exp.time_
 60 omega   34.00   83.00   1.0000   10.0000
omega____ theta____ kappa____ phi______ frames
    -       62.0000   73.0000  -75.0000 49

#__ type_ start__ end____ width___ exp.time_
 61 omega   34.00  131.00   1.0000   10.0000
omega____ theta____ kappa____ phi______ frames
    -       62.0000   75.0000  142.0000 97

#__ type_ start__ end____ width___ exp.time_
 62 omega   34.00  131.00   1.0000   10.0000
omega____ theta____ kappa____ phi______ frames
    -       62.0000   74.0000  128.0000 97

#__ type_ start__ end____ width___ exp.time_
 63 omega   -4.00   82.00   1.0000   10.0000
omega____ theta____ kappa____ phi______ frames
    -       66.0000  -80.0000   45.0000 86

#__ type_ start__ end____ width___ exp.time_
 64 omega   -5.00   97.00   1.0000   10.0000
omega____ theta____ kappa____ phi______ frames
    -       66.0000  -80.0000  -89.0000 102

#__ type_ start__ end____ width___ exp.time_
 65 omega   69.00   94.00   1.0000   10.0000
omega____ theta____ kappa____ phi______ frames
    -       66.0000  -79.0000  -55.0000 25

#__ type_ start__ end____ width___ exp.time_
 66 omega   53.00   80.00   1.0000   10.0000
omega____ theta____ kappa____ phi______ frames
    -       78.0000  -79.0000   -7.0000 27

#__ type_ start__ end____ width___ exp.time_
 67 omega   53.00   80.00   1.0000   10.0000
omega____ theta____ kappa____ phi______ frames
    -       82.0000  -79.0000   72.0000 27

#__ type_ start__ end____ width___ exp.time_
 68 omega   12.00   87.00   1.0000   10.0000
omega____ theta____ kappa____ phi______ frames
    -       82.0000  -80.0000  165.0000 75

#__ type_ start__ end____ width___ exp.time_
 69 omega  125.00  159.00   1.0000   20.0000
omega____ theta____ kappa____ phi______ frames
    -      110.2342   38.0000  150.0000 34

#__ type_ start__ end____ width___ exp.time_
 70 omega   93.00  120.00   1.0000   20.0000
omega____ theta____ kappa____ phi______ frames
    -      110.2342   50.0000  -90.0000 27

#__ type_ start__ end____ width___ exp.time_
 71 omega   85.00  123.00   1.0000   20.0000
omega____ theta____ kappa____ phi______ frames
    -      110.2342   38.0000  150.0000 38

#__ type_ start__ end____ width___ exp.time_
 72 omega   41.00  140.00   1.0000   20.0000
omega____ theta____ kappa____ phi______ frames
    -      110.2342  -79.0000   41.0000 99

#__ type_ start__ end____ width___ exp.time_
 73 omega   88.00  115.00   1.0000   20.0000
omega____ theta____ kappa____ phi______ frames
    -      110.2342   64.0000 -150.0000 27

#__ type_ start__ end____ width___ exp.time_
 74 omega   85.00  111.00   1.0000   20.0000
omega____ theta____ kappa____ phi______ frames
    -      110.2342   38.0000 -150.0000 26

#__ type_ start__ end____ width___ exp.time_
 75 omega   77.00  142.00   1.0000   20.0000
omega____ theta____ kappa____ phi______ frames
    -      110.2342  -80.0000   79.0000 65

#__ type_ start__ end____ width___ exp.time_
 76 omega   78.00  107.00   1.0000   20.0000
omega____ theta____ kappa____ phi______ frames
    -      110.2342  -80.0000  -39.0000 29

#__ type_ start__ end____ width___ exp.time_
 77 omega  117.00  142.00   1.0000   20.0000
omega____ theta____ kappa____ phi______ frames
    -      110.2342  -80.0000  136.0000 25

#__ type_ start__ end____ width___ exp.time_
 78 omega   82.00  108.00   1.0000   20.0000
omega____ theta____ kappa____ phi______ frames
    -      110.2342  -80.0000  136.0000 26

#__ type_ start__ end____ width___ exp.time_
 79 omega   88.00  178.00   1.0000   20.0000
omega____ theta____ kappa____ phi______ frames
    -      110.2342   64.0000   90.0000 90

#__ type_ start__ end____ width___ exp.time_
 80 omega  153.00  178.00   1.0000   20.0000
omega____ theta____ kappa____ phi______ frames
    -      110.2342   38.0000   30.0000 25

#__ type_ start__ end____ width___ exp.time_
 81 omega   86.00  113.00   1.0000   20.0000
omega____ theta____ kappa____ phi______ frames
    -      110.2342  -80.0000  167.0000 27

#__ type_ start__ end____ width___ exp.time_
 82 omega   48.00   75.00   1.0000   20.0000
omega____ theta____ kappa____ phi______ frames
    -      110.2342  -80.0000  167.0000 27

#__ type_ start__ end____ width___ exp.time_
 83 omega  122.00  177.00   1.0000   20.0000
omega____ theta____ kappa____ phi______ frames
    -      110.2342   64.0000   60.0000 55

#__ type_ start__ end____ width___ exp.time_
 84 omega   40.00  141.00   1.0000   20.0000
omega____ theta____ kappa____ phi______ frames
    -      110.2342  -80.0000  -84.0000 101

#__ type_ start__ end____ width___ exp.time_
 85 omega   93.00  120.00   1.0000   20.0000
omega____ theta____ kappa____ phi______ frames
    -      110.2342   50.0000   60.0000 27

#__ type_ start__ end____ width___ exp.time_
 86 omega   64.00   91.00   1.0000   20.0000
omega____ theta____ kappa____ phi______ frames
    -      110.2342  -80.0000   93.0000 27

#__ type_ start__ end____ width___ exp.time_
 87 omega   80.00  129.00   1.0000   20.0000
omega____ theta____ kappa____ phi______ frames
    -      110.2342  -80.0000   -8.0000 49

#__ type_ start__ end____ width___ exp.time_
 88 omega   39.00  141.00   1.0000   20.0000
omega____ theta____ kappa____ phi______ frames
    -      110.2342  -80.0000 -137.0000 102

#__ type_ start__ end____ width___ exp.time_
 89 omega   90.00  157.00   1.0000   20.0000
omega____ theta____ kappa____ phi______ frames
    -      110.2342   50.0000  -60.0000 67

#__ type_ start__ end____ width___ exp.time_
 90 omega  152.00  177.00   1.0000   20.0000
omega____ theta____ kappa____ phi______ frames
    -      110.2342   64.0000    0.0000 25

#__ type_ start__ end____ width___ exp.time_
 91 omega   88.00  115.00   1.0000   20.0000
omega____ theta____ kappa____ phi______ frames
    -      110.2342   64.0000    0.0000 27

#__ type_ start__ end____ width___ exp.time_
 92 omega   89.00  114.00   1.0000   20.0000
omega____ theta____ kappa____ phi______ frames
    -      110.2342   64.0000 -120.0000 25

#__ type_ start__ end____ width___ exp.time_
 93 omega   85.00  111.00   1.0000   20.0000
omega____ theta____ kappa____ phi______ frames
    -      110.2342   38.0000    0.0000 26

#__ type_ start__ end____ width___ exp.time_
 94 omega   80.00  106.00   1.0000   20.0000
omega____ theta____ kappa____ phi______ frames
    -      110.2342   77.0000  -60.0000 26

#__ type_ start__ end____ width___ exp.time_
 95 omega   88.00  177.00   1.0000   20.0000
omega____ theta____ kappa____ phi______ frames
    -      110.2342   64.0000 -180.0000 89

#__ type_ start__ end____ width___ exp.time_
 96 omega   85.00  111.00   1.0000   20.0000
omega____ theta____ kappa____ phi______ frames
    -      110.2342   38.0000  120.0000 26

#__ type_ start__ end____ width___ exp.time_
 97 omega   80.00  106.00   1.0000   20.0000
omega____ theta____ kappa____ phi______ frames
    -      110.2342   77.0000  150.0000 26

#__ type_ start__ end____ width___ exp.time_
 98 omega   85.00  111.00   1.0000   20.0000
omega____ theta____ kappa____ phi______ frames
    -      110.2342   38.0000   60.0000 26

#__ type_ start__ end____ width___ exp.time_
 99 omega   85.00  146.00   1.0000   20.0000
omega____ theta____ kappa____ phi______ frames
    -      110.2342   38.0000   90.0000 61

#__ type_ start__ end____ width___ exp.time_
100 omega   85.00  128.00   1.0000   20.0000
omega____ theta____ kappa____ phi______ frames
    -      110.2342   38.0000 -120.0000 43

#__ type_ start__ end____ width___ exp.time_
101 omega   89.00  116.00   1.0000   20.0000
omega____ theta____ kappa____ phi______ frames
    -      110.2342   57.0000  -86.0000 27

#__ type_ start__ end____ width___ exp.time_
102 omega   85.00  141.00   1.0000   20.0000
omega____ theta____ kappa____ phi______ frames
    -      110.2342   38.0000 -180.0000 56

#__ type_ start__ end____ width___ exp.time_
103 omega  132.00  178.00   1.0000   20.0000
omega____ theta____ kappa____ phi______ frames
    -      110.2342   77.0000  120.0000 46

#__ type_ start__ end____ width___ exp.time_
104 omega   80.00  106.00   1.0000   20.0000
omega____ theta____ kappa____ phi______ frames
    -      110.2342   77.0000  120.0000 26

#__ type_ start__ end____ width___ exp.time_
105 omega   80.00  106.00   1.0000   20.0000
omega____ theta____ kappa____ phi______ frames
    -      110.2342   77.0000 -180.0000 26

#__ type_ start__ end____ width___ exp.time_
106 omega   88.00  117.00   1.0000   20.0000
omega____ theta____ kappa____ phi______ frames
    -      110.2342   64.0000   60.0000 29

#__ type_ start__ end____ width___ exp.time_
107 omega  143.00  170.00   1.0000   20.0000
omega____ theta____ kappa____ phi______ frames
    -      110.2342   77.0000  -30.0000 27

#__ type_ start__ end____ width___ exp.time_
108 omega   89.00  116.00   1.0000   20.0000
omega____ theta____ kappa____ phi______ frames
    -      110.2342   50.0000   30.0000 27

#__ type_ start__ end____ width___ exp.time_
109 omega   80.00  106.00   1.0000   20.0000
omega____ theta____ kappa____ phi______ frames
    -      110.2342   77.0000  -30.0000 26

#__ type_ start__ end____ width___ exp.time_
110 omega   86.00  113.00   1.0000   20.0000
omega____ theta____ kappa____ phi______ frames
    -      110.2342   38.0000   30.0000 27

#__ type_ start__ end____ width___ exp.time_
111 omega  153.00  178.00   1.0000   20.0000
omega____ theta____ kappa____ phi______ frames
    -      110.2342   64.0000  150.0000 25

#__ type_ start__ end____ width___ exp.time_
112 omega   88.00  115.00   1.0000   20.0000
omega____ theta____ kappa____ phi______ frames
    -      110.2342   64.0000  150.0000 27

#__ type_ start__ end____ width___ exp.time_
113 omega   93.00  175.00   1.0000   20.0000
omega____ theta____ kappa____ phi______ frames
    -      110.2342   50.0000 -120.0000 82

#__ type_ start__ end____ width___ exp.time_
114 omega   92.00  119.00   1.0000   20.0000
omega____ theta____ kappa____ phi______ frames
    -      110.2342   50.0000   90.0000 27

#__ type_ start__ end____ width___ exp.time_
115 omega   80.00  106.00   1.0000   20.0000
omega____ theta____ kappa____ phi______ frames
    -      110.2342   77.0000    0.0000 26

#__ type_ start__ end____ width___ exp.time_
116 omega   88.00  178.00   1.0000   20.0000
omega____ theta____ kappa____ phi______ frames
    -      110.2342   64.0000  -60.0000 90

#__ type_ start__ end____ width___ exp.time_
117 omega   89.00  114.00   1.0000   20.0000
omega____ theta____ kappa____ phi______ frames
    -      110.2342   64.0000  120.0000 25

#__ type_ start__ end____ width___ exp.time_
118 omega   96.00  176.00   1.0000   20.0000
omega____ theta____ kappa____ phi______ frames
    -      110.2342   50.0000  150.0000 80

#__ type_ start__ end____ width___ exp.time_
119 omega   80.00  106.00   1.0000   20.0000
omega____ theta____ kappa____ phi______ frames
    -      110.2342   77.0000   30.0000 26

#__ type_ start__ end____ width___ exp.time_
120 omega   80.00  177.00   1.0000   20.0000
omega____ theta____ kappa____ phi______ frames
    -      110.2342   77.0000 -120.0000 97

#__ type_ start__ end____ width___ exp.time_
121 omega   88.00  114.00   1.0000   20.0000
omega____ theta____ kappa____ phi______ frames
    -      110.2342   64.0000  -30.0000 26

#__ type_ start__ end____ width___ exp.time_
122 omega   89.00  114.00   1.0000   20.0000
omega____ theta____ kappa____ phi______ frames
    -      110.2342   50.0000 -150.0000 25

#__ type_ start__ end____ width___ exp.time_
123 omega  136.00  178.00   1.0000   20.0000
omega____ theta____ kappa____ phi______ frames
    -      110.2342   77.0000 -150.0000 42

#__ type_ start__ end____ width___ exp.time_
124 omega   91.00  177.00   1.0000   20.0000
omega____ theta____ kappa____ phi______ frames
    -      110.2342   50.0000    0.0000 86

#__ type_ start__ end____ width___ exp.time_
125 omega   96.00  123.00   1.0000   20.0000
omega____ theta____ kappa____ phi______ frames
    -      110.2342   50.0000  120.0000 27

#__ type_ start__ end____ width___ exp.time_
126 omega   85.00  118.00   1.0000   20.0000
omega____ theta____ kappa____ phi______ frames
    -      110.2342   38.0000  -30.0000 33

#__ type_ start__ end____ width___ exp.time_
127 omega   80.00  106.00   1.0000   20.0000
omega____ theta____ kappa____ phi______ frames
    -      110.2342   77.0000 -150.0000 26

#__ type_ start__ end____ width___ exp.time_
128 omega   80.00  111.00   1.0000   20.0000
omega____ theta____ kappa____ phi______ frames
    -      110.2342   25.0000  150.0000 31

#__ type_ start__ end____ width___ exp.time_
129 omega   80.00  106.00   1.0000   20.0000
omega____ theta____ kappa____ phi______ frames
    -      110.2342   77.0000   60.0000 26

#__ type_ start__ end____ width___ exp.time_
130 omega   80.00  117.00   1.0000   20.0000
omega____ theta____ kappa____ phi______ frames
    -      110.2342   25.0000   90.0000 37

#__ type_ start__ end____ width___ exp.time_
131 omega   86.00  112.00   1.0000   20.0000
omega____ theta____ kappa____ phi______ frames
    -      110.2342   38.0000  -60.0000 26

#__ type_ start__ end____ width___ exp.time_
132 omega  128.00  171.00   1.0000   20.0000
omega____ theta____ kappa____ phi______ frames
    -      110.2342   77.0000  -90.0000 43

#__ type_ start__ end____ width___ exp.time_
133 omega   80.00  106.00   1.0000   20.0000
omega____ theta____ kappa____ phi______ frames
    -      110.2342   77.0000  -90.0000 26

#__ type_ start__ end____ width___ exp.time_
134 omega   86.00  111.00   1.0000   20.0000
omega____ theta____ kappa____ phi______ frames
    -      110.2342   38.0000  -90.0000 25

#__ type_ start__ end____ width___ exp.time_
135 omega  142.00  169.00   1.0000   20.0000
omega____ theta____ kappa____ phi______ frames
    -      110.2342   64.0000   30.0000 27

#__ type_ start__ end____ width___ exp.time_
136 omega   80.00  106.00   1.0000   20.0000
omega____ theta____ kappa____ phi______ frames
    -      110.2342   77.0000   90.0000 26

#__ type_ start__ end____ width___ exp.time_
137 omega   89.00  114.00   1.0000   20.0000
omega____ theta____ kappa____ phi______ frames
    -      110.2342   64.0000   30.0000 25

#__ type_ start__ end____ width___ exp.time_
138 omega   88.00  115.00   1.0000   20.0000
omega____ theta____ kappa____ phi______ frames
    -      110.2342   64.0000  -90.0000 27

#__ type_ start__ end____ width___ exp.time_
139 omega   94.00  119.00   1.0000   20.0000
omega____ theta____ kappa____ phi______ frames
    -      110.2342   50.0000 -180.0000 25

#__ type_ start__ end____ width___ exp.time_
140 omega   92.00  177.00   1.0000   20.0000
omega____ theta____ kappa____ phi______ frames
    -      110.2342   50.0000  -30.0000 85

;
_reflns_odcompleteness_completeness 99.94
_reflns_odcompleteness_theta     66.97
_reflns_odcompleteness_iscentric 1
_diffrn_measurement_device       '\k-geometry diffractometer'
_diffrn_detector                 'CCD plate'
_diffrn_detector_type            'Agilent EOS'
_diffrn_measurement_specimen_support 'polyimid foil'


#==end==


data_complex_14

_audit_creation_method           SHELXL-97
_audit_block_code                ga_ng13
_audit_block_refno               1335
_audit_block_usercomment         'yellow, 0.1x0.08x0.04 mm'
_audit_creation_date
;
'Thu Sep 29 13:09:57 2011'
;
_audit_update_record             'Mon Oct 29 17:39:12 CET 2012'


_chemical_name_systematic        ?
_chemical_name_common            ?
_chemical_formula_moiety         ?
_chemical_formula_sum            'C61 H73 N Ni O2 P2'
_chemical_melting_point          ?

_exptl_crystal_description       irregular
_exptl_crystal_colour            yellow
_diffrn_ambient_temperature      100(1)
_chemical_formula_weight         972.85

loop_
_atom_type_symbol
_atom_type_description
_atom_type_scat_dispersion_real
_atom_type_scat_dispersion_imag
_atom_type_scat_source
C C 0.0181 0.0091 'International Tables Vol C Tables 4.2.6.8 and 6.1.1.4'
H H 0.0000 0.0000 'International Tables Vol C Tables 4.2.6.8 and 6.1.1.4'
N N 0.0311 0.0180 'International Tables Vol C Tables 4.2.6.8 and 6.1.1.4'
Ni Ni -3.0029 0.5091 'International Tables Vol C Tables 4.2.6.8 and 6.1.1.4'
O O 0.0492 0.0322 'International Tables Vol C Tables 4.2.6.8 and 6.1.1.4'
P P 0.2955 0.4335 'International Tables Vol C Tables 4.2.6.8 and 6.1.1.4'

_symmetry_cell_setting           monoclinic
_symmetry_space_group_name_H-M   'P 21'
_symmetry_int_tables_number      4
_chemical_absolute_configuration ad

loop_
_symmetry_equiv_pos_as_xyz
'x, y, z'
'-x, y+1/2, -z'

_cell_length_a                   10.1320(2)
_cell_length_b                   19.6549(4)
_cell_length_c                   13.9636(4)
_cell_angle_alpha                90.00
_cell_angle_beta                 108.054(2)
_cell_angle_gamma                90.00
_cell_volume                     2643.85(11)
_cell_formula_units_Z            2
_cell_measurement_temperature    99.9(4)
_cell_measurement_reflns_used    38717
_cell_measurement_theta_min      4.0145
_cell_measurement_theta_max      71.9807
_exptl_crystal_size_max          0.10
_exptl_crystal_size_mid          0.08
_exptl_crystal_size_min          0.04
_exptl_crystal_density_meas      ?
_exptl_crystal_density_diffrn    1.222
_exptl_crystal_density_method    'not measured'
_exptl_crystal_F_000             1040
_exptl_absorpt_coefficient_mu    1.425
_exptl_absorpt_correction_type   multi-scan
_exptl_absorpt_correction_T_min  0.89352
_exptl_absorpt_correction_T_max  1.00000
_exptl_absorpt_process_details
;
CrysAlisPro, Agilent Technologies,
Version 1.171.35.15 (release 03-08-2011 CrysAlis171 .NET)
(compiled Aug  3 2011,13:03:54)
Empirical absorption correction using spherical harmonics,
 implemented in SCALE3 ABSPACK scaling algorithm.
;

_exptl_special_details
;
 ?
;
_diffrn_radiation_probe          x-ray
_diffrn_radiation_type           'Cu K\a'
_diffrn_radiation_wavelength     1.5418
_diffrn_source                   'microfocus X-Ray tube'
_diffrn_source_type              'Agilent SuperNova (Cu) X-ray Source'
_diffrn_radiation_monochromator  mirror
_diffrn_measurement_device_type  'Agilent SuperNova, Dual, Cu at zero, Eos'
_diffrn_measurement_method       '\w and \p scans'
_diffrn_detector_area_resol_mean 15.9241
_diffrn_reflns_number            57008
_diffrn_reflns_av_R_equivalents  0.0399
_diffrn_reflns_av_sigmaI/netI    0.0230
_diffrn_reflns_limit_h_min       -12
_diffrn_reflns_limit_h_max       12
_diffrn_reflns_limit_k_min       -24
_diffrn_reflns_limit_k_max       24
_diffrn_reflns_limit_l_min       -17
_diffrn_reflns_limit_l_max       17
_diffrn_reflns_theta_min         4.02
_diffrn_reflns_theta_max         72.10
_reflns_number_total             9707
_reflns_number_gt                9550
_reflns_threshold_expression     >2sigma(I)
_computing_data_collection
;
CrysAlisPro, Agilent Technologies,
Version 1.171.35.15 (release 03-08-2011 CrysAlis171 .NET)
(compiled Aug  3 2011,13:03:54)
;
_computing_cell_refinement
;
CrysAlisPro, Agilent Technologies,
Version 1.171.35.15 (release 03-08-2011 CrysAlis171 .NET)
(compiled Aug  3 2011,13:03:54)
;
_computing_data_reduction
;
CrysAlisPro, Agilent Technologies,
Version 1.171.35.15 (release 03-08-2011 CrysAlis171 .NET)
(compiled Aug  3 2011,13:03:54)
;
_computing_structure_solution    'SUPERFLIP (Palatinus, 2007-2009)'
_computing_structure_refinement  'SHELXL-97 (Sheldrick, 2008)'
_computing_molecular_graphics    ?
_computing_publication_material  'encif (Wadepohl, 2012); encifer 1.4 (CCDC, 2011)'

_refine_special_details
;
 Refinement of F^2^ against ALL reflections.  The weighted R-factor wR and
 goodness of fit S are based on F^2^, conventional R-factors R are based
 on F, with F set to zero for negative F^2^. The threshold expression of
 F^2^ > 2sigma(F^2^) is used only for calculating R-factors(gt) etc. and is
 not relevant to the choice of reflections for refinement.  R-factors based
 on F^2^ are statistically about twice as large as those based on F, and R-
 factors based on ALL data will be even larger.
;

_refine_ls_structure_factor_coef Fsqd
_refine_ls_matrix_type           full
_refine_ls_weighting_scheme      calc
_refine_ls_weighting_details
'calc w=1/[\s^2^(Fo^2^)+(0.0436P)^2^+0.5886P] where P=(Fo^2^+2Fc^2^)/3'
_atom_sites_solution_primary     iterative
_atom_sites_solution_secondary   difmap
_atom_sites_solution_hydrogens   geom
_refine_ls_hydrogen_treatment    constr
_refine_ls_extinction_method     none
_refine_ls_extinction_coef       ?
_refine_ls_abs_structure_details 'Flack H D (1983), Acta Cryst. A39, 876-881'
_refine_ls_abs_structure_Flack   -0.003(10)
_refine_ls_number_reflns         9707
_refine_ls_number_parameters     649
_refine_ls_number_restraints     31
_refine_ls_R_factor_all          0.0280
_refine_ls_R_factor_gt           0.0274
_refine_ls_wR_factor_ref         0.0712
_refine_ls_wR_factor_gt          0.0706
_refine_ls_goodness_of_fit_ref   1.029
_refine_ls_restrained_S_all      1.028
_refine_ls_shift/su_max          0.000
_refine_ls_shift/su_mean         0.000

loop_
_atom_site_label
_atom_site_type_symbol
_atom_site_fract_x
_atom_site_fract_y
_atom_site_fract_z
_atom_site_U_iso_or_equiv
_atom_site_adp_type
_atom_site_occupancy
_atom_site_symmetry_multiplicity
_atom_site_calc_flag
_atom_site_refinement_flags
_atom_site_disorder_assembly
_atom_site_disorder_group
Ni Ni 0.28216(3) 0.289319(13) 0.07065(2) 0.01639(7) Uani 1 1 d . . .
P1 P 0.19984(4) 0.185384(18) 0.06224(3) 0.01453(8) Uani 1 1 d . A .
P2 P 0.35402(4) 0.394441(18) 0.07247(3) 0.01652(9) Uani 1 1 d . A .
O1A O 0.3227(2) 0.29411(10) 0.21106(15) 0.0197(4) Uani 0.763(3) 1 d PDU A 1
O2A O 0.48913(18) 0.21487(9) 0.23623(13) 0.0287(5) Uani 0.763(3) 1 d PD A 1
C56A C 0.4187(3) 0.25415(12) 0.2674(2) 0.0204(5) Uani 0.763(3) 1 d PDU A 1
C57A C 0.4345(8) 0.2576(2) 0.3782(3) 0.0309(10) Uani 0.763(3) 1 d PDU A 1
H57A H 0.3695 0.2912 0.3895 0.046 Uiso 0.763(3) 1 calc PR A 1
H57B H 0.5297 0.2709 0.4156 0.046 Uiso 0.763(3) 1 calc PR A 1
H57C H 0.4146 0.2128 0.4014 0.046 Uiso 0.763(3) 1 calc PR A 1
O1B O 0.3831(8) 0.2692(3) 0.2059(5) 0.0248(14) Uani 0.237(3) 1 d PDU A 2
O2B O 0.2607(7) 0.3391(3) 0.2656(5) 0.0361(17) Uani 0.237(3) 1 d PD A 2
C56B C 0.3504(8) 0.2964(4) 0.2776(7) 0.0282(19) Uani 0.237(3) 1 d PDU A 2
C57B C 0.427(3) 0.2729(11) 0.3832(11) 0.0305(12) Uani 0.237(3) 1 d PDU A 2
H57D H 0.5023 0.2422 0.3816 0.046 Uiso 0.237(3) 1 calc PR A 2
H57E H 0.3624 0.2489 0.4112 0.046 Uiso 0.237(3) 1 calc PR A 2
H57F H 0.4656 0.3124 0.4254 0.046 Uiso 0.237(3) 1 calc PR A 2
N1 N 0.22005(14) 0.29271(7) -0.07324(9) 0.0139(2) Uani 1 1 d . A .
C2 C 0.27843(17) 0.32988(7) -0.13567(12) 0.0153(3) Uani 1 1 d . . .
C3 C 0.39001(17) 0.37628(8) -0.11153(13) 0.0175(3) Uani 1 1 d . A .
C4 C 0.42487(18) 0.40641(8) -0.19084(13) 0.0191(3) Uani 1 1 d . . .
H4 H 0.5003 0.4375 -0.1747 0.023 Uiso 1 1 calc R A .
C5 C 0.35543(17) 0.39361(8) -0.29313(12) 0.0190(3) Uani 1 1 d . A .
C6 C 0.24454(18) 0.34936(8) -0.31593(12) 0.0182(3) Uani 1 1 d . . .
H6 H 0.1942 0.3399 -0.3842 0.022 Uiso 1 1 calc R A .
C7 C 0.20603(17) 0.31831(8) -0.23848(12) 0.0162(3) Uani 1 1 d . A .
C8 C 0.09672(17) 0.27217(7) -0.24109(12) 0.0165(3) Uani 1 1 d . . .
C9 C -0.00440(17) 0.24206(8) -0.32124(12) 0.0170(3) Uani 1 1 d . A .
H9 H -0.0107 0.2537 -0.3885 0.020 Uiso 1 1 calc R . .
C10 C -0.09606(17) 0.19492(8) -0.30287(12) 0.0170(3) Uani 1 1 d . . .
C11 C -0.08322(17) 0.18124(8) -0.20124(12) 0.0170(3) Uani 1 1 d . A .
H11 H -0.1454 0.1493 -0.1876 0.020 Uiso 1 1 calc R . .
C12 C 0.01416(17) 0.21139(8) -0.12011(12) 0.0155(3) Uani 1 1 d . . .
C13 C 0.10892(16) 0.25763(7) -0.13935(12) 0.0148(3) Uani 1 1 d . A .
C14 C 0.01952(17) 0.19177(8) -0.01483(12) 0.0173(3) Uani 1 1 d . A .
H14A H -0.0277 0.1476 -0.0158 0.021 Uiso 1 1 calc R . .
H14B H -0.0286 0.2265 0.0135 0.021 Uiso 1 1 calc R . .
C15 C 0.46942(18) 0.39558(9) -0.00476(13) 0.0200(3) Uani 1 1 d . . .
H15A H 0.5095 0.4416 -0.0036 0.024 Uiso 1 1 calc R A .
H15B H 0.5466 0.3631 0.0228 0.024 Uiso 1 1 calc R . .
C16 C 0.19486(18) 0.13151(8) 0.17104(13) 0.0189(3) Uani 1 1 d . . .
H16 H 0.2767 0.1433 0.2302 0.023 Uiso 1 1 calc R A .
C17 C 0.2166(2) 0.05942(8) 0.13484(15) 0.0244(4) Uani 1 1 d . A .
H17A H 0.2478 0.0281 0.1930 0.029 Uiso 1 1 calc R . .
H17B H 0.1286 0.0419 0.0881 0.029 Uiso 1 1 calc R . .
C18 C 0.3267(2) 0.06424(9) 0.08129(15) 0.0260(4) Uani 1 1 d . . .
H18A H 0.3362 0.0201 0.0500 0.031 Uiso 1 1 calc R A .
H18B H 0.4177 0.0766 0.1297 0.031 Uiso 1 1 calc R . .
C19 C 0.27807(18) 0.11970(8) -0.00006(13) 0.0197(3) Uani 1 1 d . A .
H19 H 0.2018 0.1000 -0.0571 0.024 Uiso 1 1 calc R . .
C20 C 0.4422(2) 0.44558(9) 0.18668(13) 0.0238(4) Uani 1 1 d . . .
H20 H 0.4013 0.4320 0.2405 0.029 Uiso 1 1 calc R A .
C21 C 0.3918(2) 0.51859(9) 0.15350(16) 0.0305(4) Uani 1 1 d . A .
H21A H 0.4082 0.5484 0.2132 0.037 Uiso 1 1 calc R . .
H21B H 0.4432 0.5374 0.1096 0.037 Uiso 1 1 calc R . .
C22 C 0.2378(2) 0.51518(9) 0.09649(18) 0.0347(5) Uani 1 1 d . . .
H22A H 0.2058 0.5592 0.0629 0.042 Uiso 1 1 calc R A .
H22B H 0.1846 0.5056 0.1437 0.042 Uiso 1 1 calc R . .
C23 C 0.21401(19) 0.45779(8) 0.01708(14) 0.0231(4) Uani 1 1 d . A .
H23 H 0.2296 0.4772 -0.0447 0.028 Uiso 1 1 calc R . .
C24 C 0.40644(19) 0.42696(9) -0.37495(13) 0.0239(4) Uani 1 1 d . . .
C25 C 0.3094(2) 0.41299(9) -0.48072(13) 0.0273(4) Uani 1 1 d . A .
H25A H 0.3014 0.3638 -0.4923 0.041 Uiso 1 1 calc R . .
H25B H 0.3468 0.4342 -0.5303 0.041 Uiso 1 1 calc R . .
H25C H 0.2175 0.4320 -0.4875 0.041 Uiso 1 1 calc R . .
C26 C 0.4177(3) 0.50444(10) -0.35972(15) 0.0403(5) Uani 1 1 d . A .
H26A H 0.3253 0.5235 -0.3684 0.060 Uiso 1 1 calc R . .
H26B H 0.4564 0.5247 -0.4093 0.060 Uiso 1 1 calc R . .
H26C H 0.4787 0.5146 -0.2917 0.060 Uiso 1 1 calc R . .
C27 C 0.5494(2) 0.39701(15) -0.36723(18) 0.0450(6) Uani 1 1 d . A .
H27A H 0.6161 0.4096 -0.3023 0.067 Uiso 1 1 calc R . .
H27B H 0.5807 0.4150 -0.4220 0.067 Uiso 1 1 calc R . .
H27C H 0.5425 0.3473 -0.3725 0.067 Uiso 1 1 calc R . .
C28 C -0.20520(19) 0.15726(9) -0.38631(13) 0.0213(3) Uani 1 1 d . A .
C29 C -0.1745(2) 0.08010(9) -0.37483(14) 0.0315(4) Uani 1 1 d . . .
H29A H -0.0811 0.0713 -0.3787 0.047 Uiso 1 1 calc R A .
H29B H -0.2428 0.0555 -0.4290 0.047 Uiso 1 1 calc R . .
H29C H -0.1803 0.0646 -0.3095 0.047 Uiso 1 1 calc R . .
C30 C -0.35050(19) 0.17083(11) -0.37836(14) 0.0289(4) Uani 1 1 d . . .
H30A H -0.3548 0.1549 -0.3129 0.043 Uiso 1 1 calc R A .
H30B H -0.4197 0.1465 -0.4324 0.043 Uiso 1 1 calc R . .
H30C H -0.3698 0.2198 -0.3847 0.043 Uiso 1 1 calc R . .
C31 C -0.2030(2) 0.17830(10) -0.49121(13) 0.0263(4) Uani 1 1 d . . .
H31A H -0.2226 0.2271 -0.5008 0.039 Uiso 1 1 calc R A .
H31B H -0.2737 0.1526 -0.5423 0.039 Uiso 1 1 calc R . .
H31C H -0.1113 0.1687 -0.4978 0.039 Uiso 1 1 calc R . .
C32 C 0.06339(18) 0.14308(9) 0.19977(12) 0.0208(3) Uani 1 1 d . A .
C33 C -0.0352(2) 0.09224(10) 0.19030(14) 0.0271(4) Uani 1 1 d . . .
H33 H -0.0201 0.0485 0.1667 0.032 Uiso 1 1 calc R A .
C34 C -0.1560(2) 0.10484(12) 0.21507(15) 0.0349(5) Uani 1 1 d . A .
H34 H -0.2222 0.0695 0.2087 0.042 Uiso 1 1 calc R . .
C35 C -0.1803(2) 0.16830(13) 0.24890(14) 0.0372(5) Uani 1 1 d . . .
H35 H -0.2629 0.1768 0.2655 0.045 Uiso 1 1 calc R A .
C36 C -0.0827(2) 0.21931(12) 0.25831(15) 0.0360(5) Uani 1 1 d . A .
H36 H -0.0987 0.2631 0.2812 0.043 Uiso 1 1 calc R . .
C37 C 0.0390(2) 0.20679(9) 0.23443(14) 0.0287(4) Uani 1 1 d . . .
H37 H 0.1056 0.2420 0.2419 0.034 Uiso 1 1 calc R A .
C38 C 0.38766(19) 0.14771(8) -0.04296(13) 0.0206(3) Uani 1 1 d . . .
C39 C 0.35708(19) 0.15717(8) -0.14615(14) 0.0222(3) Uani 1 1 d . A .
H39 H 0.2688 0.1440 -0.1900 0.027 Uiso 1 1 calc R . .
C40 C 0.4538(2) 0.18557(9) -0.18586(14) 0.0262(4) Uani 1 1 d . . .
H40 H 0.4309 0.1922 -0.2565 0.031 Uiso 1 1 calc R A .
C41 C 0.5834(2) 0.20429(9) -0.12334(15) 0.0275(4) Uani 1 1 d . A .
H41 H 0.6501 0.2232 -0.1508 0.033 Uiso 1 1 calc R . .
C42 C 0.6153(2) 0.19525(10) -0.01995(15) 0.0302(4) Uani 1 1 d . . .
H42 H 0.7040 0.2081 0.0236 0.036 Uiso 1 1 calc R A .
C43 C 0.5175(2) 0.16735(9) 0.01986(14) 0.0255(4) Uani 1 1 d . A .
H43 H 0.5395 0.1617 0.0906 0.031 Uiso 1 1 calc R . .
C44 C 0.5976(2) 0.43693(9) 0.22919(14) 0.0280(4) Uani 1 1 d . A .
C45 C 0.6905(2) 0.47723(10) 0.19822(15) 0.0321(4) Uani 1 1 d . . .
H45 H 0.6556 0.5104 0.1471 0.039 Uiso 1 1 calc R A .
C46 C 0.8316(2) 0.46969(12) 0.24051(18) 0.0410(5) Uani 1 1 d . A .
H46 H 0.8930 0.4974 0.2182 0.049 Uiso 1 1 calc R . .
C47 C 0.8844(3) 0.42207(12) 0.31520(19) 0.0472(6) Uani 1 1 d . . .
H47 H 0.9819 0.4169 0.3442 0.057 Uiso 1 1 calc R A .
C48 C 0.7953(3) 0.38231(11) 0.34718(19) 0.0522(7) Uani 1 1 d . A .
H48 H 0.8312 0.3495 0.3987 0.063 Uiso 1 1 calc R . .
C49 C 0.6528(3) 0.38966(11) 0.30476(16) 0.0419(5) Uani 1 1 d . . .
H49 H 0.5921 0.3619 0.3278 0.050 Uiso 1 1 calc R A .
C50 C 0.07107(19) 0.42567(8) -0.01341(15) 0.0247(4) Uani 1 1 d . . .
C51 C 0.0067(2) 0.40719(10) 0.05783(17) 0.0324(4) Uani 1 1 d . A .
H51 H 0.0518 0.4158 0.1272 0.039 Uiso 1 1 calc R . .
C52 C -0.1235(2) 0.37610(11) 0.0277(2) 0.0431(5) Uani 1 1 d . . .
H52 H -0.1671 0.3641 0.0766 0.052 Uiso 1 1 calc R A .
C53 C -0.1889(2) 0.36280(11) -0.0723(2) 0.0459(6) Uani 1 1 d . A .
H53 H -0.2783 0.3424 -0.0928 0.055 Uiso 1 1 calc R . .
C54 C -0.1251(2) 0.37904(10) -0.14240(19) 0.0423(6) Uani 1 1 d . . .
H54 H -0.1693 0.3684 -0.2113 0.051 Uiso 1 1 calc R A .
C55 C 0.0037(2) 0.41092(9) -0.11398(16) 0.0305(4) Uani 1 1 d . A .
H55 H 0.0459 0.4227 -0.1637 0.037 Uiso 1 1 calc R . .
C91 C 0.7692(2) 0.68367(12) 0.46261(16) 0.0407(5) Uani 1 1 d . . .
H91A H 0.8017 0.6779 0.4039 0.061 Uiso 1 1 calc R . .
H91B H 0.8420 0.7056 0.5171 0.061 Uiso 1 1 calc R . .
H91C H 0.6857 0.7121 0.4442 0.061 Uiso 1 1 calc R . .
C92 C 0.7358(2) 0.61510(12) 0.49740(17) 0.0375(5) Uani 1 1 d . . .
H92A H 0.6617 0.5935 0.4422 0.045 Uiso 1 1 calc R . .
H92B H 0.6997 0.6215 0.5550 0.045 Uiso 1 1 calc R . .
C93 C 0.8609(2) 0.56744(11) 0.52923(16) 0.0337(4) Uani 1 1 d . . .
H93A H 0.8935 0.5588 0.4704 0.040 Uiso 1 1 calc R . .
H93B H 0.9372 0.5902 0.5814 0.040 Uiso 1 1 calc R . .
C94 C 0.8299(2) 0.50024(11) 0.57006(17) 0.0381(5) Uani 1 1 d . . .
H94A H 0.7537 0.4775 0.5178 0.046 Uiso 1 1 calc R . .
H94B H 0.7971 0.5090 0.6287 0.046 Uiso 1 1 calc R . .
C95 C 0.9536(3) 0.45271(13) 0.60199(18) 0.0485(6) Uani 1 1 d . . .
H95A H 0.9899 0.4456 0.5453 0.073 Uiso 1 1 calc R . .
H95B H 0.9248 0.4089 0.6227 0.073 Uiso 1 1 calc R . .
H95C H 1.0261 0.4728 0.6586 0.073 Uiso 1 1 calc R . .

loop_
_atom_site_aniso_label
_atom_site_aniso_U_11
_atom_site_aniso_U_22
_atom_site_aniso_U_33
_atom_site_aniso_U_23
_atom_site_aniso_U_13
_atom_site_aniso_U_12
Ni 0.02038(15) 0.01283(12) 0.01542(13) 0.00030(9) 0.00476(11) -0.00313(10)
P1 0.0160(2) 0.01112(17) 0.01753(18) 0.00175(14) 0.00670(17) 0.00075(14)
P2 0.0189(2) 0.01219(17) 0.01853(19) -0.00190(14) 0.00582(17) -0.00239(14)
O1A 0.0242(10) 0.0169(8) 0.0169(11) -0.0003(7) 0.0049(9) 0.0019(7)
O2A 0.0240(10) 0.0333(9) 0.0275(9) 0.0004(7) 0.0060(8) 0.0052(7)
C56A 0.0178(12) 0.0218(12) 0.0198(14) 0.0024(10) 0.0032(11) -0.0015(9)
C57A 0.0390(15) 0.033(3) 0.0184(10) 0.0010(13) 0.0059(11) 0.003(2)
O1B 0.028(4) 0.019(3) 0.021(4) 0.007(3) -0.001(3) -0.007(3)
O2B 0.051(4) 0.030(3) 0.031(3) 0.002(2) 0.019(3) 0.002(3)
C56B 0.029(5) 0.023(4) 0.029(5) 0.001(3) 0.005(4) -0.014(4)
C57B 0.0383(17) 0.034(3) 0.0179(13) 0.0012(16) 0.0063(13) 0.004(2)
N1 0.0141(6) 0.0111(5) 0.0162(6) -0.0006(5) 0.0043(5) -0.0005(5)
C2 0.0167(9) 0.0120(7) 0.0184(8) 0.0021(5) 0.0072(7) 0.0033(6)
C3 0.0170(8) 0.0142(7) 0.0212(8) -0.0005(6) 0.0058(7) 0.0004(6)
C4 0.0175(8) 0.0152(7) 0.0251(8) 0.0011(6) 0.0071(7) -0.0033(6)
C5 0.0206(9) 0.0146(7) 0.0228(8) 0.0041(6) 0.0082(7) 0.0006(6)
C6 0.0210(9) 0.0166(7) 0.0169(8) 0.0005(6) 0.0059(7) 0.0007(6)
C7 0.0174(8) 0.0115(6) 0.0199(8) -0.0001(6) 0.0062(7) 0.0011(6)
C8 0.0176(8) 0.0128(7) 0.0192(8) 0.0011(6) 0.0058(7) 0.0016(6)
C9 0.0180(8) 0.0165(7) 0.0158(7) 0.0013(6) 0.0042(7) 0.0005(6)
C10 0.0164(8) 0.0145(7) 0.0200(8) -0.0016(6) 0.0055(7) -0.0010(6)
C11 0.0163(8) 0.0136(7) 0.0217(8) -0.0006(6) 0.0065(7) -0.0010(6)
C12 0.0152(8) 0.0136(7) 0.0180(8) 0.0010(6) 0.0054(7) 0.0026(6)
C13 0.0145(8) 0.0116(7) 0.0176(8) -0.0003(5) 0.0038(7) 0.0024(6)
C14 0.0180(8) 0.0162(7) 0.0190(8) -0.0009(6) 0.0078(7) -0.0016(6)
C15 0.0177(9) 0.0194(7) 0.0237(8) 0.0001(6) 0.0076(7) -0.0021(6)
C16 0.0204(9) 0.0171(7) 0.0193(8) 0.0055(6) 0.0063(7) -0.0001(6)
C17 0.0269(10) 0.0174(8) 0.0312(10) 0.0066(7) 0.0126(8) 0.0035(6)
C18 0.0291(10) 0.0168(8) 0.0353(10) 0.0065(7) 0.0148(9) 0.0077(7)
C19 0.0216(9) 0.0142(7) 0.0250(9) 0.0016(6) 0.0095(8) 0.0032(6)
C20 0.0297(10) 0.0199(8) 0.0223(8) -0.0075(6) 0.0088(8) -0.0081(7)
C21 0.0314(11) 0.0180(8) 0.0423(11) -0.0128(8) 0.0116(9) -0.0060(7)
C22 0.0296(11) 0.0198(9) 0.0551(13) -0.0146(8) 0.0138(10) -0.0033(7)
C23 0.0243(9) 0.0156(7) 0.0305(9) -0.0013(7) 0.0101(8) 0.0022(6)
C24 0.0247(10) 0.0256(9) 0.0215(8) 0.0062(7) 0.0072(8) -0.0057(7)
C25 0.0343(11) 0.0271(9) 0.0216(9) 0.0040(7) 0.0103(8) -0.0068(7)
C26 0.0644(16) 0.0280(10) 0.0242(9) 0.0040(8) 0.0073(10) -0.0223(10)
C27 0.0294(12) 0.0709(16) 0.0397(12) 0.0222(11) 0.0180(10) 0.0039(11)
C28 0.0235(9) 0.0224(8) 0.0176(8) -0.0013(6) 0.0057(7) -0.0054(6)
C29 0.0431(12) 0.0232(9) 0.0251(9) -0.0070(7) 0.0061(9) -0.0082(8)
C30 0.0207(10) 0.0420(11) 0.0236(9) -0.0040(7) 0.0062(8) -0.0067(8)
C31 0.0254(10) 0.0327(9) 0.0185(8) -0.0024(7) 0.0037(8) -0.0079(7)
C32 0.0207(9) 0.0262(8) 0.0152(8) 0.0054(6) 0.0054(7) 0.0014(7)
C33 0.0258(10) 0.0320(9) 0.0249(9) 0.0013(7) 0.0101(8) -0.0055(7)
C34 0.0238(11) 0.0521(13) 0.0308(10) 0.0042(9) 0.0114(9) -0.0064(9)
C35 0.0248(11) 0.0671(15) 0.0227(9) 0.0068(9) 0.0118(9) 0.0101(9)
C36 0.0382(12) 0.0441(11) 0.0288(10) 0.0008(8) 0.0147(10) 0.0113(9)
C37 0.0328(11) 0.0280(9) 0.0283(9) 0.0006(7) 0.0136(9) 0.0015(7)
C38 0.0235(9) 0.0159(7) 0.0245(8) 0.0000(6) 0.0103(8) 0.0068(6)
C39 0.0236(9) 0.0165(7) 0.0271(9) -0.0005(6) 0.0088(8) 0.0071(6)
C40 0.0331(11) 0.0223(8) 0.0277(9) 0.0035(7) 0.0157(9) 0.0080(7)
C41 0.0313(11) 0.0219(8) 0.0369(10) -0.0003(7) 0.0220(9) -0.0002(7)
C42 0.0265(10) 0.0328(10) 0.0335(10) -0.0043(8) 0.0127(9) -0.0043(8)
C43 0.0245(10) 0.0295(9) 0.0243(9) -0.0017(7) 0.0100(8) 0.0013(7)
C44 0.0360(11) 0.0204(8) 0.0237(9) -0.0079(7) 0.0039(9) -0.0067(7)
C45 0.0309(11) 0.0315(10) 0.0300(10) -0.0013(8) 0.0037(9) -0.0051(8)
C46 0.0344(13) 0.0424(12) 0.0424(12) -0.0063(10) 0.0061(11) -0.0063(9)
C47 0.0381(14) 0.0427(12) 0.0475(13) -0.0122(10) -0.0061(12) 0.0048(10)
C48 0.0641(18) 0.0300(11) 0.0418(13) 0.0027(9) -0.0136(13) 0.0005(11)
C49 0.0511(15) 0.0287(10) 0.0342(11) 0.0002(9) -0.0040(11) -0.0131(10)
C50 0.0221(9) 0.0139(7) 0.0365(10) -0.0020(7) 0.0065(8) 0.0049(6)
C51 0.0259(10) 0.0302(10) 0.0402(11) -0.0025(8) 0.0089(9) -0.0022(8)
C52 0.0274(12) 0.0346(11) 0.0690(16) -0.0011(10) 0.0174(12) -0.0027(8)
C53 0.0178(11) 0.0242(10) 0.0869(19) -0.0160(11) 0.0038(12) 0.0011(8)
C54 0.0269(12) 0.0310(11) 0.0537(14) -0.0202(10) -0.0097(11) 0.0129(8)
C55 0.0286(11) 0.0214(9) 0.0363(11) -0.0051(7) 0.0026(9) 0.0115(7)
C91 0.0419(13) 0.0460(12) 0.0345(11) 0.0029(10) 0.0120(10) -0.0010(10)
C92 0.0319(12) 0.0432(12) 0.0400(12) 0.0031(9) 0.0148(10) 0.0013(9)
C93 0.0281(11) 0.0427(11) 0.0315(10) -0.0001(8) 0.0110(9) -0.0022(8)
C94 0.0411(13) 0.0362(11) 0.0425(12) -0.0014(9) 0.0210(11) 0.0008(9)
C95 0.0589(17) 0.0436(13) 0.0389(12) -0.0001(10) 0.0092(12) 0.0121(11)

_geom_special_details
;
 All esds (except the esd in the dihedral angle between two l.s. planes)
 are estimated using the full covariance matrix.  The cell esds are taken
 into account individually in the estimation of esds in distances, angles
 and torsion angles; correlations between esds in cell parameters are only
 used when they are defined by crystal symmetry.  An approximate (isotropic)
 treatment of cell esds is used for estimating esds involving l.s. planes.
;

loop_
_geom_bond_atom_site_label_1
_geom_bond_atom_site_label_2
_geom_bond_distance
_geom_bond_site_symmetry_2
_geom_bond_publ_flag
Ni O1A 1.877(2) . ?
Ni O1B 1.890(7) . ?
Ni N1 1.9113(13) . ?
Ni P2 2.1882(5) . ?
Ni P1 2.1959(4) . ?
P1 C14 1.8147(17) . ?
P1 C19 1.8653(16) . ?
P1 C16 1.8652(16) . ?
P2 C15 1.8200(16) . ?
P2 C20 1.8624(17) . ?
P2 C23 1.8657(18) . ?
O1A C56A 1.306(3) . ?
O2A C56A 1.219(3) . ?
C56A C57A 1.507(5) . ?
C57A H57A 0.9800 . ?
C57A H57B 0.9800 . ?
C57A H57C 0.9800 . ?
O1B C56B 1.267(10) . ?
O2B C56B 1.210(10) . ?
C56B C57B 1.509(14) . ?
C57B H57D 0.9800 . ?
C57B H57E 0.9800 . ?
C57B H57F 0.9800 . ?
N1 C13 1.397(2) . ?
N1 C2 1.4012(19) . ?
C2 C3 1.410(2) . ?
C2 C7 1.414(2) . ?
C3 C4 1.394(2) . ?
C3 C15 1.507(2) . ?
C4 C5 1.406(2) . ?
C4 H4 0.9500 . ?
C5 C6 1.378(2) . ?
C5 C24 1.539(2) . ?
C6 C7 1.398(2) . ?
C6 H6 0.9500 . ?
C7 C8 1.423(2) . ?
C8 C9 1.393(2) . ?
C8 C13 1.417(2) . ?
C9 C10 1.391(2) . ?
C9 H9 0.9500 . ?
C10 C11 1.410(2) . ?
C10 C28 1.526(2) . ?
C11 C12 1.384(2) . ?
C11 H11 0.9500 . ?
C12 C13 1.407(2) . ?
C12 C14 1.504(2) . ?
C14 H14A 0.9900 . ?
C14 H14B 0.9900 . ?
C15 H15A 0.9900 . ?
C15 H15B 0.9900 . ?
C16 C32 1.523(2) . ?
C16 C17 1.543(2) . ?
C16 H16 1.0000 . ?
C17 C18 1.526(2) . ?
C17 H17A 0.9900 . ?
C17 H17B 0.9900 . ?
C18 C19 1.541(2) . ?
C18 H18A 0.9900 . ?
C18 H18B 0.9900 . ?
C19 C38 1.519(2) . ?
C19 H19 1.0000 . ?
C20 C44 1.510(3) . ?
C20 C21 1.545(3) . ?
C20 H20 1.0000 . ?
C21 C22 1.518(3) . ?
C21 H21A 0.9900 . ?
C21 H21B 0.9900 . ?
C22 C23 1.547(2) . ?
C22 H22A 0.9900 . ?
C22 H22B 0.9900 . ?
C23 C50 1.515(3) . ?
C23 H23 1.0000 . ?
C24 C25 1.524(3) . ?
C24 C27 1.536(3) . ?
C24 C26 1.537(3) . ?
C25 H25A 0.9800 . ?
C25 H25B 0.9800 . ?
C25 H25C 0.9800 . ?
C26 H26A 0.9800 . ?
C26 H26B 0.9800 . ?
C26 H26C 0.9800 . ?
C27 H27A 0.9800 . ?
C27 H27B 0.9800 . ?
C27 H27C 0.9800 . ?
C28 C31 1.529(2) . ?
C28 C30 1.534(2) . ?
C28 C29 1.546(2) . ?
C29 H29A 0.9800 . ?
C29 H29B 0.9800 . ?
C29 H29C 0.9800 . ?
C30 H30A 0.9800 . ?
C30 H30B 0.9800 . ?
C30 H30C 0.9800 . ?
C31 H31A 0.9800 . ?
C31 H31B 0.9800 . ?
C31 H31C 0.9800 . ?
C32 C33 1.390(2) . ?
C32 C37 1.392(2) . ?
C33 C34 1.393(3) . ?
C33 H33 0.9500 . ?
C34 C35 1.382(3) . ?
C34 H34 0.9500 . ?
C35 C36 1.386(3) . ?
C35 H35 0.9500 . ?
C36 C37 1.395(3) . ?
C36 H36 0.9500 . ?
C37 H37 0.9500 . ?
C38 C39 1.389(3) . ?
C38 C43 1.390(3) . ?
C39 C40 1.384(2) . ?
C39 H39 0.9500 . ?
C40 C41 1.383(3) . ?
C40 H40 0.9500 . ?
C41 C42 1.390(3) . ?
C41 H41 0.9500 . ?
C42 C43 1.391(2) . ?
C42 H42 0.9500 . ?
C43 H43 0.9500 . ?
C44 C49 1.387(3) . ?
C44 C45 1.397(3) . ?
C45 C46 1.375(3) . ?
C45 H45 0.9500 . ?
C46 C47 1.380(3) . ?
C46 H46 0.9500 . ?
C47 C48 1.369(4) . ?
C47 H47 0.9500 . ?
C48 C49 1.388(4) . ?
C48 H48 0.9500 . ?
C49 H49 0.9500 . ?
C50 C55 1.388(3) . ?
C50 C51 1.396(3) . ?
C51 C52 1.396(3) . ?
C51 H51 0.9500 . ?
C52 C53 1.372(4) . ?
C52 H52 0.9500 . ?
C53 C54 1.368(4) . ?
C53 H53 0.9500 . ?
C54 C55 1.390(3) . ?
C54 H54 0.9500 . ?
C55 H55 0.9500 . ?
C91 C92 1.506(3) . ?
C91 H91A 0.9800 . ?
C91 H91B 0.9800 . ?
C91 H91C 0.9800 . ?
C92 C93 1.527(3) . ?
C92 H92A 0.9900 . ?
C92 H92B 0.9900 . ?
C93 C94 1.510(3) . ?
C93 H93A 0.9900 . ?
C93 H93B 0.9900 . ?
C94 C95 1.515(3) . ?
C94 H94A 0.9900 . ?
C94 H94B 0.9900 . ?
C95 H95A 0.9800 . ?
C95 H95B 0.9800 . ?
C95 H95C 0.9800 . ?

loop_
_geom_angle_atom_site_label_1
_geom_angle_atom_site_label_2
_geom_angle_atom_site_label_3
_geom_angle
_geom_angle_site_symmetry_1
_geom_angle_site_symmetry_3
_geom_angle_publ_flag
O1A Ni O1B 24.7(2) . . ?
O1A Ni N1 172.09(8) . . ?
O1B Ni N1 163.2(2) . . ?
O1A Ni P2 88.63(5) . . ?
O1B Ni P2 96.39(17) . . ?
N1 Ni P2 88.81(4) . . ?
O1A Ni P1 93.38(5) . . ?
O1B Ni P1 86.41(17) . . ?
N1 Ni P1 88.88(4) . . ?
P2 Ni P1 176.89(2) . . ?
C14 P1 C19 105.45(8) . . ?
C14 P1 C16 104.24(7) . . ?
C19 P1 C16 96.29(7) . . ?
C14 P1 Ni 105.27(5) . . ?
C19 P1 Ni 117.36(5) . . ?
C16 P1 Ni 126.18(6) . . ?
C15 P2 C20 105.97(8) . . ?
C15 P2 C23 106.96(8) . . ?
C20 P2 C23 95.51(8) . . ?
C15 P2 Ni 106.10(6) . . ?
C20 P2 Ni 126.10(6) . . ?
C23 P2 Ni 114.70(6) . . ?
C56A O1A Ni 118.6(2) . . ?
O2A C56A O1A 125.1(3) . . ?
O2A C56A C57A 120.4(3) . . ?
O1A C56A C57A 114.4(3) . . ?
C56A C57A H57A 109.5 . . ?
C56A C57A H57B 109.5 . . ?
H57A C57A H57B 109.5 . . ?
C56A C57A H57C 109.5 . . ?
H57A C57A H57C 109.5 . . ?
H57B C57A H57C 109.5 . . ?
C56B O1B Ni 120.6(7) . . ?
O2B C56B O1B 123.5(10) . . ?
O2B C56B C57B 118.9(11) . . ?
O1B C56B C57B 117.5(11) . . ?
C56B C57B H57D 109.5 . . ?
C56B C57B H57E 109.5 . . ?
H57D C57B H57E 109.5 . . ?
C56B C57B H57F 109.5 . . ?
H57D C57B H57F 109.5 . . ?
H57E C57B H57F 109.5 . . ?
C13 N1 C2 104.80(12) . . ?
C13 N1 Ni 127.79(10) . . ?
C2 N1 Ni 127.39(11) . . ?
N1 C2 C3 130.58(15) . . ?
N1 C2 C7 111.21(14) . . ?
C3 C2 C7 118.18(14) . . ?
C4 C3 C2 117.82(15) . . ?
C4 C3 C15 119.33(15) . . ?
C2 C3 C15 122.83(14) . . ?
C3 C4 C5 124.11(15) . . ?
C3 C4 H4 117.9 . . ?
C5 C4 H4 117.9 . . ?
C6 C5 C4 117.60(14) . . ?
C6 C5 C24 122.33(15) . . ?
C4 C5 C24 120.05(15) . . ?
C5 C6 C7 119.98(16) . . ?
C5 C6 H6 120.0 . . ?
C7 C6 H6 120.0 . . ?
C6 C7 C2 122.27(15) . . ?
C6 C7 C8 131.28(16) . . ?
C2 C7 C8 106.46(14) . . ?
C9 C8 C13 122.26(14) . . ?
C9 C8 C7 131.59(15) . . ?
C13 C8 C7 106.11(14) . . ?
C10 C9 C8 120.10(14) . . ?
C10 C9 H9 119.9 . . ?
C8 C9 H9 119.9 . . ?
C9 C10 C11 117.00(15) . . ?
C9 C10 C28 123.33(14) . . ?
C11 C10 C28 119.66(14) . . ?
C12 C11 C10 124.20(14) . . ?
C12 C11 H11 117.9 . . ?
C10 C11 H11 117.9 . . ?
C11 C12 C13 118.42(14) . . ?
C11 C12 C14 119.39(14) . . ?
C13 C12 C14 122.14(15) . . ?
N1 C13 C12 130.59(14) . . ?
N1 C13 C8 111.42(13) . . ?
C12 C13 C8 117.98(15) . . ?
C12 C14 P1 108.79(10) . . ?
C12 C14 H14A 109.9 . . ?
P1 C14 H14A 109.9 . . ?
C12 C14 H14B 109.9 . . ?
P1 C14 H14B 109.9 . . ?
H14A C14 H14B 108.3 . . ?
C3 C15 P2 109.82(11) . . ?
C3 C15 H15A 109.7 . . ?
P2 C15 H15A 109.7 . . ?
C3 C15 H15B 109.7 . . ?
P2 C15 H15B 109.7 . . ?
H15A C15 H15B 108.2 . . ?
C32 C16 C17 116.68(14) . . ?
C32 C16 P1 112.12(11) . . ?
C17 C16 P1 102.22(11) . . ?
C32 C16 H16 108.5 . . ?
C17 C16 H16 108.5 . . ?
P1 C16 H16 108.5 . . ?
C18 C17 C16 107.69(13) . . ?
C18 C17 H17A 110.2 . . ?
C16 C17 H17A 110.2 . . ?
C18 C17 H17B 110.2 . . ?
C16 C17 H17B 110.2 . . ?
H17A C17 H17B 108.5 . . ?
C17 C18 C19 106.85(14) . . ?
C17 C18 H18A 110.4 . . ?
C19 C18 H18A 110.4 . . ?
C17 C18 H18B 110.4 . . ?
C19 C18 H18B 110.4 . . ?
H18A C18 H18B 108.6 . . ?
C38 C19 C18 116.19(15) . . ?
C38 C19 P1 113.66(11) . . ?
C18 C19 P1 103.35(11) . . ?
C38 C19 H19 107.7 . . ?
C18 C19 H19 107.7 . . ?
P1 C19 H19 107.7 . . ?
C44 C20 C21 115.43(15) . . ?
C44 C20 P2 116.15(12) . . ?
C21 C20 P2 102.61(13) . . ?
C44 C20 H20 107.4 . . ?
C21 C20 H20 107.4 . . ?
P2 C20 H20 107.4 . . ?
C22 C21 C20 107.85(15) . . ?
C22 C21 H21A 110.1 . . ?
C20 C21 H21A 110.1 . . ?
C22 C21 H21B 110.1 . . ?
C20 C21 H21B 110.1 . . ?
H21A C21 H21B 108.4 . . ?
C21 C22 C23 108.34(15) . . ?
C21 C22 H22A 110.0 . . ?
C23 C22 H22A 110.0 . . ?
C21 C22 H22B 110.0 . . ?
C23 C22 H22B 110.0 . . ?
H22A C22 H22B 108.4 . . ?
C50 C23 C22 115.36(15) . . ?
C50 C23 P2 112.10(11) . . ?
C22 C23 P2 105.05(13) . . ?
C50 C23 H23 108.0 . . ?
C22 C23 H23 108.0 . . ?
P2 C23 H23 108.0 . . ?
C25 C24 C27 108.08(16) . . ?
C25 C24 C26 108.10(15) . . ?
C27 C24 C26 109.99(18) . . ?
C25 C24 C5 112.22(14) . . ?
C27 C24 C5 108.12(14) . . ?
C26 C24 C5 110.30(15) . . ?
C24 C25 H25A 109.5 . . ?
C24 C25 H25B 109.5 . . ?
H25A C25 H25B 109.5 . . ?
C24 C25 H25C 109.5 . . ?
H25A C25 H25C 109.5 . . ?
H25B C25 H25C 109.5 . . ?
C24 C26 H26A 109.5 . . ?
C24 C26 H26B 109.5 . . ?
H26A C26 H26B 109.5 . . ?
C24 C26 H26C 109.5 . . ?
H26A C26 H26C 109.5 . . ?
H26B C26 H26C 109.5 . . ?
C24 C27 H27A 109.5 . . ?
C24 C27 H27B 109.5 . . ?
H27A C27 H27B 109.5 . . ?
C24 C27 H27C 109.5 . . ?
H27A C27 H27C 109.5 . . ?
H27B C27 H27C 109.5 . . ?
C10 C28 C31 112.21(14) . . ?
C10 C28 C30 110.18(13) . . ?
C31 C28 C30 108.76(15) . . ?
C10 C28 C29 108.76(15) . . ?
C31 C28 C29 107.60(14) . . ?
C30 C28 C29 109.24(15) . . ?
C28 C29 H29A 109.5 . . ?
C28 C29 H29B 109.5 . . ?
H29A C29 H29B 109.5 . . ?
C28 C29 H29C 109.5 . . ?
H29A C29 H29C 109.5 . . ?
H29B C29 H29C 109.5 . . ?
C28 C30 H30A 109.5 . . ?
C28 C30 H30B 109.5 . . ?
H30A C30 H30B 109.5 . . ?
C28 C30 H30C 109.5 . . ?
H30A C30 H30C 109.5 . . ?
H30B C30 H30C 109.5 . . ?
C28 C31 H31A 109.5 . . ?
C28 C31 H31B 109.5 . . ?
H31A C31 H31B 109.5 . . ?
C28 C31 H31C 109.5 . . ?
H31A C31 H31C 109.5 . . ?
H31B C31 H31C 109.5 . . ?
C33 C32 C37 118.66(16) . . ?
C33 C32 C16 121.97(16) . . ?
C37 C32 C16 119.35(16) . . ?
C32 C33 C34 120.62(19) . . ?
C32 C33 H33 119.7 . . ?
C34 C33 H33 119.7 . . ?
C35 C34 C33 120.6(2) . . ?
C35 C34 H34 119.7 . . ?
C33 C34 H34 119.7 . . ?
C34 C35 C36 119.21(18) . . ?
C34 C35 H35 120.4 . . ?
C36 C35 H35 120.4 . . ?
C35 C36 C37 120.5(2) . . ?
C35 C36 H36 119.8 . . ?
C37 C36 H36 119.8 . . ?
C32 C37 C36 120.49(19) . . ?
C32 C37 H37 119.8 . . ?
C36 C37 H37 119.8 . . ?
C39 C38 C43 118.72(16) . . ?
C39 C38 C19 120.15(16) . . ?
C43 C38 C19 121.06(16) . . ?
C40 C39 C38 120.76(18) . . ?
C40 C39 H39 119.6 . . ?
C38 C39 H39 119.6 . . ?
C41 C40 C39 120.41(17) . . ?
C41 C40 H40 119.8 . . ?
C39 C40 H40 119.8 . . ?
C40 C41 C42 119.46(16) . . ?
C40 C41 H41 120.3 . . ?
C42 C41 H41 120.3 . . ?
C41 C42 C43 120.02(18) . . ?
C41 C42 H42 120.0 . . ?
C43 C42 H42 120.0 . . ?
C38 C43 C42 120.63(17) . . ?
C38 C43 H43 119.7 . . ?
C42 C43 H43 119.7 . . ?
C49 C44 C45 117.6(2) . . ?
C49 C44 C20 119.97(18) . . ?
C45 C44 C20 122.33(18) . . ?
C46 C45 C44 121.1(2) . . ?
C46 C45 H45 119.5 . . ?
C44 C45 H45 119.5 . . ?
C45 C46 C47 120.4(2) . . ?
C45 C46 H46 119.8 . . ?
C47 C46 H46 119.8 . . ?
C48 C47 C46 119.6(2) . . ?
C48 C47 H47 120.2 . . ?
C46 C47 H47 120.2 . . ?
C47 C48 C49 120.3(2) . . ?
C47 C48 H48 119.8 . . ?
C49 C48 H48 119.8 . . ?
C44 C49 C48 121.0(2) . . ?
C44 C49 H49 119.5 . . ?
C48 C49 H49 119.5 . . ?
C55 C50 C51 118.33(19) . . ?
C55 C50 C23 119.92(17) . . ?
C51 C50 C23 121.68(18) . . ?
C52 C51 C50 120.4(2) . . ?
C52 C51 H51 119.8 . . ?
C50 C51 H51 119.8 . . ?
C53 C52 C51 120.2(2) . . ?
C53 C52 H52 119.9 . . ?
C51 C52 H52 119.9 . . ?
C54 C53 C52 119.8(2) . . ?
C54 C53 H53 120.1 . . ?
C52 C53 H53 120.1 . . ?
C53 C54 C55 120.8(2) . . ?
C53 C54 H54 119.6 . . ?
C55 C54 H54 119.6 . . ?
C50 C55 C54 120.4(2) . . ?
C50 C55 H55 119.8 . . ?
C54 C55 H55 119.8 . . ?
C92 C91 H91A 109.5 . . ?
C92 C91 H91B 109.5 . . ?
H91A C91 H91B 109.5 . . ?
C92 C91 H91C 109.5 . . ?
H91A C91 H91C 109.5 . . ?
H91B C91 H91C 109.5 . . ?
C91 C92 C93 113.17(18) . . ?
C91 C92 H92A 108.9 . . ?
C93 C92 H92A 108.9 . . ?
C91 C92 H92B 108.9 . . ?
C93 C92 H92B 108.9 . . ?
H92A C92 H92B 107.8 . . ?
C94 C93 C92 113.28(17) . . ?
C94 C93 H93A 108.9 . . ?
C92 C93 H93A 108.9 . . ?
C94 C93 H93B 108.9 . . ?
C92 C93 H93B 108.9 . . ?
H93A C93 H93B 107.7 . . ?
C93 C94 C95 113.60(19) . . ?
C93 C94 H94A 108.8 . . ?
C95 C94 H94A 108.8 . . ?
C93 C94 H94B 108.8 . . ?
C95 C94 H94B 108.8 . . ?
H94A C94 H94B 107.7 . . ?
C94 C95 H95A 109.5 . . ?
C94 C95 H95B 109.5 . . ?
H95A C95 H95B 109.5 . . ?
C94 C95 H95C 109.5 . . ?
H95A C95 H95C 109.5 . . ?
H95B C95 H95C 109.5 . . ?

loop_
_geom_torsion_atom_site_label_1
_geom_torsion_atom_site_label_2
_geom_torsion_atom_site_label_3
_geom_torsion_atom_site_label_4
_geom_torsion
_geom_torsion_site_symmetry_1
_geom_torsion_site_symmetry_2
_geom_torsion_site_symmetry_3
_geom_torsion_site_symmetry_4
_geom_torsion_publ_flag
O1A Ni P1 C14 118.17(8) . . . . ?
O1B Ni P1 C14 141.8(2) . . . . ?
N1 Ni P1 C14 -54.24(6) . . . . ?
P2 Ni P1 C14 -12.2(4) . . . . ?
O1A Ni P1 C19 -124.94(9) . . . . ?
O1B Ni P1 C19 -101.3(2) . . . . ?
N1 Ni P1 C19 62.65(8) . . . . ?
P2 Ni P1 C19 104.7(3) . . . . ?
O1A Ni P1 C16 -2.85(10) . . . . ?
O1B Ni P1 C16 20.8(2) . . . . ?
N1 Ni P1 C16 -175.26(8) . . . . ?
P2 Ni P1 C16 -133.3(3) . . . . ?
O1A Ni P2 C15 132.77(9) . . . . ?
O1B Ni P2 C15 109.3(2) . . . . ?
N1 Ni P2 C15 -54.72(7) . . . . ?
P1 Ni P2 C15 -96.7(4) . . . . ?
O1A Ni P2 C20 8.39(10) . . . . ?
O1B Ni P2 C20 -15.1(2) . . . . ?
N1 Ni P2 C20 -179.10(8) . . . . ?
P1 Ni P2 C20 138.9(3) . . . . ?
O1A Ni P2 C23 -109.40(9) . . . . ?
O1B Ni P2 C23 -132.9(2) . . . . ?
N1 Ni P2 C23 63.11(7) . . . . ?
P1 Ni P2 C23 21.1(4) . . . . ?
O1B Ni O1A C56A -7.8(4) . . . . ?
N1 Ni O1A C56A 172.5(4) . . . . ?
P2 Ni O1A C56A -116.33(16) . . . . ?
P1 Ni O1A C56A 66.04(16) . . . . ?
Ni O1A C56A O2A 2.8(3) . . . . ?
Ni O1A C56A C57A -174.9(3) . . . . ?
O1A Ni O1B C56B -2.8(4) . . . . ?
N1 Ni O1B C56B 177.1(4) . . . . ?
P2 Ni O1B C56B 69.7(5) . . . . ?
P1 Ni O1B C56B -109.0(5) . . . . ?
Ni O1B C56B O2B -4.6(10) . . . . ?
Ni O1B C56B C57B 174.4(13) . . . . ?
O1A Ni N1 C13 -78.7(5) . . . . ?
O1B Ni N1 C13 101.6(6) . . . . ?
P2 Ni N1 C13 -149.92(13) . . . . ?
P1 Ni N1 C13 28.00(13) . . . . ?
O1A Ni N1 C2 102.9(5) . . . . ?
O1B Ni N1 C2 -76.8(6) . . . . ?
P2 Ni N1 C2 31.74(13) . . . . ?
P1 Ni N1 C2 -150.34(13) . . . . ?
C13 N1 C2 C3 177.55(15) . . . . ?
Ni N1 C2 C3 -3.8(2) . . . . ?
C13 N1 C2 C7 -0.14(16) . . . . ?
Ni N1 C2 C7 178.49(11) . . . . ?
N1 C2 C3 C4 -179.50(15) . . . . ?
C7 C2 C3 C4 -1.9(2) . . . . ?
N1 C2 C3 C15 -1.1(3) . . . . ?
C7 C2 C3 C15 176.45(14) . . . . ?
C2 C3 C4 C5 0.3(2) . . . . ?
C15 C3 C4 C5 -178.18(15) . . . . ?
C3 C4 C5 C6 1.2(2) . . . . ?
C3 C4 C5 C24 -177.12(15) . . . . ?
C4 C5 C6 C7 -0.9(2) . . . . ?
C24 C5 C6 C7 177.38(15) . . . . ?
C5 C6 C7 C2 -0.8(2) . . . . ?
C5 C6 C7 C8 179.10(16) . . . . ?
N1 C2 C7 C6 -179.70(14) . . . . ?
C3 C2 C7 C6 2.3(2) . . . . ?
N1 C2 C7 C8 0.35(17) . . . . ?
C3 C2 C7 C8 -177.67(13) . . . . ?
C6 C7 C8 C9 1.8(3) . . . . ?
C2 C7 C8 C9 -178.30(16) . . . . ?
C6 C7 C8 C13 179.66(16) . . . . ?
C2 C7 C8 C13 -0.40(16) . . . . ?
C13 C8 C9 C10 -1.3(2) . . . . ?
C7 C8 C9 C10 176.31(16) . . . . ?
C8 C9 C10 C11 1.6(2) . . . . ?
C8 C9 C10 C28 -177.08(15) . . . . ?
C9 C10 C11 C12 -0.2(2) . . . . ?
C28 C10 C11 C12 178.49(15) . . . . ?
C10 C11 C12 C13 -1.5(2) . . . . ?
C10 C11 C12 C14 -178.92(14) . . . . ?
C2 N1 C13 C12 178.58(15) . . . . ?
Ni N1 C13 C12 0.0(2) . . . . ?
C2 N1 C13 C8 -0.12(17) . . . . ?
Ni N1 C13 C8 -178.75(11) . . . . ?
C11 C12 C13 N1 -176.90(15) . . . . ?
C14 C12 C13 N1 0.5(2) . . . . ?
C11 C12 C13 C8 1.7(2) . . . . ?
C14 C12 C13 C8 179.12(14) . . . . ?
C9 C8 C13 N1 178.47(14) . . . . ?
C7 C8 C13 N1 0.33(17) . . . . ?
C9 C8 C13 C12 -0.4(2) . . . . ?
C7 C8 C13 C12 -178.55(13) . . . . ?
C11 C12 C14 P1 139.70(13) . . . . ?
C13 C12 C14 P1 -37.67(18) . . . . ?
C19 P1 C14 C12 -58.83(12) . . . . ?
C16 P1 C14 C12 -159.64(10) . . . . ?
Ni P1 C14 C12 65.90(11) . . . . ?
C4 C3 C15 P2 145.65(13) . . . . ?
C2 C3 C15 P2 -32.72(19) . . . . ?
C20 P2 C15 C3 -161.40(11) . . . . ?
C23 P2 C15 C3 -60.34(13) . . . . ?
Ni P2 C15 C3 62.52(12) . . . . ?
C14 P1 C16 C32 -33.49(14) . . . . ?
C19 P1 C16 C32 -141.22(13) . . . . ?
Ni P1 C16 C32 87.98(13) . . . . ?
C14 P1 C16 C17 92.24(12) . . . . ?
C19 P1 C16 C17 -15.49(13) . . . . ?
Ni P1 C16 C17 -146.29(9) . . . . ?
C32 C16 C17 C18 163.28(15) . . . . ?
P1 C16 C17 C18 40.59(17) . . . . ?
C16 C17 C18 C19 -53.6(2) . . . . ?
C17 C18 C19 C38 163.25(15) . . . . ?
C17 C18 C19 P1 38.06(17) . . . . ?
C14 P1 C19 C38 113.98(13) . . . . ?
C16 P1 C19 C38 -139.33(13) . . . . ?
Ni P1 C19 C38 -2.81(15) . . . . ?
C14 P1 C19 C18 -119.22(12) . . . . ?
C16 P1 C19 C18 -12.53(13) . . . . ?
Ni P1 C19 C18 124.00(11) . . . . ?
C15 P2 C20 C44 -39.08(15) . . . . ?
C23 P2 C20 C44 -148.49(14) . . . . ?
Ni P2 C20 C44 85.36(14) . . . . ?
C15 P2 C20 C21 87.79(13) . . . . ?
C23 P2 C20 C21 -21.63(12) . . . . ?
Ni P2 C20 C21 -147.78(9) . . . . ?
C44 C20 C21 C22 170.08(16) . . . . ?
P2 C20 C21 C22 42.75(17) . . . . ?
C20 C21 C22 C23 -48.8(2) . . . . ?
C21 C22 C23 C50 153.71(17) . . . . ?
C21 C22 C23 P2 29.75(19) . . . . ?
C15 P2 C23 C50 121.47(13) . . . . ?
C20 P2 C23 C50 -129.97(13) . . . . ?
Ni P2 C23 C50 4.13(14) . . . . ?
C15 P2 C23 C22 -112.52(13) . . . . ?
C20 P2 C23 C22 -3.96(13) . . . . ?
Ni P2 C23 C22 130.14(11) . . . . ?
C6 C5 C24 C25 7.8(2) . . . . ?
C4 C5 C24 C25 -173.99(15) . . . . ?
C6 C5 C24 C27 -111.3(2) . . . . ?
C4 C5 C24 C27 66.9(2) . . . . ?
C6 C5 C24 C26 128.40(19) . . . . ?
C4 C5 C24 C26 -53.4(2) . . . . ?
C9 C10 C28 C31 -0.9(2) . . . . ?
C11 C10 C28 C31 -179.57(15) . . . . ?
C9 C10 C28 C30 -122.28(17) . . . . ?
C11 C10 C28 C30 59.1(2) . . . . ?
C9 C10 C28 C29 118.00(17) . . . . ?
C11 C10 C28 C29 -60.64(19) . . . . ?
C17 C16 C32 C33 -2.5(2) . . . . ?
P1 C16 C32 C33 114.92(16) . . . . ?
C17 C16 C32 C37 179.05(16) . . . . ?
P1 C16 C32 C37 -63.56(19) . . . . ?
C37 C32 C33 C34 0.0(3) . . . . ?
C16 C32 C33 C34 -178.54(17) . . . . ?
C32 C33 C34 C35 0.4(3) . . . . ?
C33 C34 C35 C36 -0.2(3) . . . . ?
C34 C35 C36 C37 -0.3(3) . . . . ?
C33 C32 C37 C36 -0.5(3) . . . . ?
C16 C32 C37 C36 178.03(17) . . . . ?
C35 C36 C37 C32 0.7(3) . . . . ?
C18 C19 C38 C39 135.69(17) . . . . ?
P1 C19 C38 C39 -104.56(16) . . . . ?
C18 C19 C38 C43 -47.4(2) . . . . ?
P1 C19 C38 C43 72.35(18) . . . . ?
C43 C38 C39 C40 0.0(2) . . . . ?
C19 C38 C39 C40 177.00(15) . . . . ?
C38 C39 C40 C41 0.8(3) . . . . ?
C39 C40 C41 C42 -0.9(3) . . . . ?
C40 C41 C42 C43 0.2(3) . . . . ?
C39 C38 C43 C42 -0.7(3) . . . . ?
C19 C38 C43 C42 -177.64(16) . . . . ?
C41 C42 C43 C38 0.6(3) . . . . ?
C21 C20 C44 C49 146.65(18) . . . . ?
P2 C20 C44 C49 -93.17(19) . . . . ?
C21 C20 C44 C45 -30.5(2) . . . . ?
P2 C20 C44 C45 89.66(19) . . . . ?
C49 C44 C45 C46 0.7(3) . . . . ?
C20 C44 C45 C46 177.91(18) . . . . ?
C44 C45 C46 C47 -0.3(3) . . . . ?
C45 C46 C47 C48 -0.1(4) . . . . ?
C46 C47 C48 C49 0.1(4) . . . . ?
C45 C44 C49 C48 -0.7(3) . . . . ?
C20 C44 C49 C48 -177.95(19) . . . . ?
C47 C48 C49 C44 0.3(4) . . . . ?
C22 C23 C50 C55 138.00(18) . . . . ?
P2 C23 C50 C55 -101.82(16) . . . . ?
C22 C23 C50 C51 -45.1(2) . . . . ?
P2 C23 C50 C51 75.03(19) . . . . ?
C55 C50 C51 C52 -1.5(3) . . . . ?
C23 C50 C51 C52 -178.36(18) . . . . ?
C50 C51 C52 C53 0.7(3) . . . . ?
C51 C52 C53 C54 1.1(3) . . . . ?
C52 C53 C54 C55 -2.1(3) . . . . ?
C51 C50 C55 C54 0.5(3) . . . . ?
C23 C50 C55 C54 177.49(16) . . . . ?
C53 C54 C55 C50 1.2(3) . . . . ?
C91 C92 C93 C94 176.51(18) . . . . ?
C92 C93 C94 C95 -179.89(19) . . . . ?

_diffrn_measured_fraction_theta_max 0.961
_diffrn_reflns_theta_full        72.10
_diffrn_measured_fraction_theta_full 0.961
_refine_diff_density_max         0.376
_refine_diff_density_min         -0.206
_refine_diff_density_rms         0.040
_cell_oxdiff_length_a            10.1320(2)
_cell_oxdiff_length_b            19.6549(4)
_cell_oxdiff_length_c            13.9636(4)
_cell_oxdiff_angle_alpha         89.9812(19)
_cell_oxdiff_angle_beta          108.054(2)
_cell_oxdiff_angle_gamma         90.0042(18)
_cell_oxdiff_volume              2643.85(11)
_cell_oxdiff_measurement_reflns_used 38717
loop_
_exptl_crystal_face_index_h
_exptl_crystal_face_index_k
_exptl_crystal_face_index_l
_exptl_crystal_face_perp_dist
_exptl_oxdiff_crystal_face_indexfrac_h
_exptl_oxdiff_crystal_face_indexfrac_k
_exptl_oxdiff_crystal_face_indexfrac_l
_exptl_oxdiff_crystal_face_x
_exptl_oxdiff_crystal_face_y
_exptl_oxdiff_crystal_face_z
3 -12 -1 0.1021 3.0152 -12.0000 -1.0347 -0.1187 -1.0392 -0.0416
0 -3 8 0.0609 0.0046 -3.0330 8.0114 0.7582 -0.3086 -0.5012
0 3 -8 0.0656 -0.0046 3.0330 -8.0114 -0.7582 0.3086 0.5012
3 -11 -3 0.0863 3.0137 -10.9916 -3.0369 -0.3110 -0.9437 0.0774
5 4 3 0.0669 4.9875 3.9991 3.0114 -0.0448 -0.0222 -1.0133
-5 -4 -3 0.0839 -4.9875 -3.9991 -3.0114 0.0448 0.0222 1.0133
0 0 -9 0.0632 0.0001 0.0347 -9.0210 -0.8151 0.0995 0.6493
6 5 -3 0.0459 5.9848 5.0246 -3.0013 -0.6538 0.0610 -0.7448
-6 -5 3 0.0611 -5.9848 -5.0246 3.0013 0.6538 -0.0610 0.7448
6 6 -2 0.0492 5.9832 6.0214 -1.9965 -0.5744 0.1233 -0.8423
0 -1 8 0.0597 0.0014 -1.0316 8.0163 0.7357 -0.1618 -0.5519
0 1 -8 0.0663 -0.0014 1.0316 -8.0163 -0.7357 0.1618 0.5519
5 4 3 0.0669 4.9875 3.9991 3.0114 -0.0448 -0.0222 -1.0133
3 -12 -1 0.0989 3.0152 -12.0000 -1.0347 -0.1187 -1.0392 -0.0416
-3 12 1 0.0946 -3.0152 12.0000 1.0347 0.1187 1.0392 0.0416
0 0 9 0.0556 -0.0001 -0.0347 9.0210 0.8151 -0.0995 -0.6493
3 8 4 0.0562 2.9836 7.9950 4.0256 0.1094 0.3733 -0.9084
-3 11 3 0.0809 -3.0137 10.9916 3.0369 0.3110 0.9437 -0.0774
_diffrn_orient_matrix_UB_11      -0.0542678000
_diffrn_orient_matrix_UB_12      -0.0115323000
_diffrn_orient_matrix_UB_13      0.0903050000
_diffrn_orient_matrix_UB_21      -0.0567149000
_diffrn_orient_matrix_UB_22      0.0732726000
_diffrn_orient_matrix_UB_23      -0.0107440000
_diffrn_orient_matrix_UB_31      -0.1393333000
_diffrn_orient_matrix_UB_32      -0.0253309000
_diffrn_orient_matrix_UB_33      -0.0720759000
_diffrn_measurement_details
;
#__ type_ start__ end____ width___ exp.time_
  1 omega    3.00   29.00   1.0000    2.0000
omega____ theta____ kappa____ phi______ frames
    -       26.0000   80.0000  139.0000 26

#__ type_ start__ end____ width___ exp.time_
  2 omega  -56.00   25.00   1.0000    8.0000
omega____ theta____ kappa____ phi______ frames
    -      -42.5000   57.0000  -60.0000 81

#__ type_ start__ end____ width___ exp.time_
  3 omega  -26.00   25.00   1.0000    8.0000
omega____ theta____ kappa____ phi______ frames
    -      -42.5000   50.0000   60.0000 51

#__ type_ start__ end____ width___ exp.time_
  4 omega  -60.00   23.00   1.0000    8.0000
omega____ theta____ kappa____ phi______ frames
    -      -42.5000   63.0000  150.0000 83

#__ type_ start__ end____ width___ exp.time_
  5 phi    262.00  329.00   1.0000    8.0000
omega____ theta____ kappa____ phi______ frames
 -42.5000  -42.5000  -20.0000     -     67

#__ type_ start__ end____ width___ exp.time_
  6 omega   14.00   39.00   1.0000    8.0000
omega____ theta____ kappa____ phi______ frames
    -       46.0000   80.0000  110.0000 25

#__ type_ start__ end____ width___ exp.time_
  7 omega   19.00   44.00   1.0000    8.0000
omega____ theta____ kappa____ phi______ frames
    -       50.0000   79.0000  130.0000 25

#__ type_ start__ end____ width___ exp.time_
  8 omega   19.00   46.00   1.0000    8.0000
omega____ theta____ kappa____ phi______ frames
    -       50.0000   79.0000   23.0000 27

#__ type_ start__ end____ width___ exp.time_
  9 omega   56.00  104.00   1.0000    8.0000
omega____ theta____ kappa____ phi______ frames
    -       54.0000   76.0000   48.0000 48

#__ type_ start__ end____ width___ exp.time_
 10 omega   23.00   49.00   1.0000    8.0000
omega____ theta____ kappa____ phi______ frames
    -       54.0000   78.0000   61.0000 26

#__ type_ start__ end____ width___ exp.time_
 11 omega   39.00  104.00   1.0000    8.0000
omega____ theta____ kappa____ phi______ frames
    -       55.1171   74.0000  -72.0000 65

#__ type_ start__ end____ width___ exp.time_
 12 omega   29.00  107.00   1.0000    8.0000
omega____ theta____ kappa____ phi______ frames
    -       58.0000   75.0000  148.0000 78

#__ type_ start__ end____ width___ exp.time_
 13 omega   31.00   63.00   1.0000    8.0000
omega____ theta____ kappa____ phi______ frames
    -       58.0000   72.0000  121.0000 32

#__ type_ start__ end____ width___ exp.time_
 14 omega   80.00  106.00   1.0000   14.0000
omega____ theta____ kappa____ phi______ frames
    -      110.2342   77.0000   60.0000 26

#__ type_ start__ end____ width___ exp.time_
 15 phi      1.00   83.00   1.0000   14.0000
omega____ theta____ kappa____ phi______ frames
 110.2342  110.2342  -60.0000     -     82

#__ type_ start__ end____ width___ exp.time_
 16 omega   81.00  178.00   1.0000   14.0000
omega____ theta____ kappa____ phi______ frames
    -      110.2342   77.0000 -150.0000 97

#__ type_ start__ end____ width___ exp.time_
 17 omega   91.00  178.00   1.0000   14.0000
omega____ theta____ kappa____ phi______ frames
    -      110.2342   77.0000 -180.0000 87

#__ type_ start__ end____ width___ exp.time_
 18 omega   88.00  177.00   1.0000   14.0000
omega____ theta____ kappa____ phi______ frames
    -      110.2342   77.0000  -90.0000 89

#__ type_ start__ end____ width___ exp.time_
 19 omega   88.00  154.00   1.0000   14.0000
omega____ theta____ kappa____ phi______ frames
    -      110.2342   63.0000  120.0000 66

#__ type_ start__ end____ width___ exp.time_
 20 omega   80.00  106.00   1.0000   14.0000
omega____ theta____ kappa____ phi______ frames
    -      110.2342   77.0000   90.0000 26

#__ type_ start__ end____ width___ exp.time_
 21 phi    263.00  360.00   1.0000   14.0000
omega____ theta____ kappa____ phi______ frames
 110.2342  110.2342  -60.0000     -     97

#__ type_ start__ end____ width___ exp.time_
 22 omega  144.00  178.00   1.0000   14.0000
omega____ theta____ kappa____ phi______ frames
    -      110.2342   77.0000  120.0000 34

#__ type_ start__ end____ width___ exp.time_
 23 omega   80.00  106.00   1.0000   14.0000
omega____ theta____ kappa____ phi______ frames
    -      110.2342   77.0000  120.0000 26

#__ type_ start__ end____ width___ exp.time_
 24 omega  150.00  178.00   1.0000   14.0000
omega____ theta____ kappa____ phi______ frames
    -      110.2342   77.0000  150.0000 28

#__ type_ start__ end____ width___ exp.time_
 25 omega   88.00  120.00   1.0000   14.0000
omega____ theta____ kappa____ phi______ frames
    -      110.2342   63.0000   60.0000 32

#__ type_ start__ end____ width___ exp.time_
 26 omega   88.00  178.00   1.0000   14.0000
omega____ theta____ kappa____ phi______ frames
    -      110.2342   63.0000   90.0000 90

#__ type_ start__ end____ width___ exp.time_
 27 omega  101.00  177.00   1.0000   14.0000
omega____ theta____ kappa____ phi______ frames
    -      110.2342   77.0000  -60.0000 76

#__ type_ start__ end____ width___ exp.time_
 28 omega   89.00  114.00   1.0000   14.0000
omega____ theta____ kappa____ phi______ frames
    -      110.2342   50.0000  120.0000 25

#__ type_ start__ end____ width___ exp.time_
 29 omega  151.00  177.00   1.0000   14.0000
omega____ theta____ kappa____ phi______ frames
    -      110.2342   77.0000  -30.0000 26

#__ type_ start__ end____ width___ exp.time_
 30 omega   89.00  151.00   1.0000   14.0000
omega____ theta____ kappa____ phi______ frames
    -      110.2342   50.0000   90.0000 62

#__ type_ start__ end____ width___ exp.time_
 31 omega   87.00  178.00   1.0000   14.0000
omega____ theta____ kappa____ phi______ frames
    -      110.2342   77.0000 -120.0000 91

#__ type_ start__ end____ width___ exp.time_
 32 omega   92.00  118.00   1.0000   14.0000
omega____ theta____ kappa____ phi______ frames
    -      110.2342   50.0000   60.0000 26

#__ type_ start__ end____ width___ exp.time_
 33 omega  131.00  157.00   1.0000   14.0000
omega____ theta____ kappa____ phi______ frames
    -      110.2342   77.0000   60.0000 26

#__ type_ start__ end____ width___ exp.time_
 34 omega   88.00  167.00   1.0000   14.0000
omega____ theta____ kappa____ phi______ frames
    -      110.2342   63.0000  150.0000 79

#__ type_ start__ end____ width___ exp.time_
 35 omega   80.00  106.00   1.0000   14.0000
omega____ theta____ kappa____ phi______ frames
    -      110.2342   77.0000   30.0000 26

#__ type_ start__ end____ width___ exp.time_
 36 omega  -14.00   46.00   1.0000    2.0000
omega____ theta____ kappa____ phi______ frames
    -       18.0000   80.0000  -79.0000 60

#__ type_ start__ end____ width___ exp.time_
 37 omega   -2.00   46.00   1.0000    8.0000
omega____ theta____ kappa____ phi______ frames
    -       30.0000   80.0000    0.0000 48

#__ type_ start__ end____ width___ exp.time_
 38 omega    2.00   46.00   1.0000    8.0000
omega____ theta____ kappa____ phi______ frames
    -       34.0000   80.0000 -173.0000 44

#__ type_ start__ end____ width___ exp.time_
 39 omega  -73.00   28.00   1.0000    8.0000
omega____ theta____ kappa____ phi______ frames
    -      -42.5000   77.0000 -120.0000 101

#__ type_ start__ end____ width___ exp.time_
 40 omega  -73.00   28.00   1.0000    8.0000
omega____ theta____ kappa____ phi______ frames
    -      -42.5000   77.0000    0.0000 101

#__ type_ start__ end____ width___ exp.time_
 41 phi      0.00  120.00   1.0000    8.0000
omega____ theta____ kappa____ phi______ frames
 -42.5000  -42.5000  -20.0000     -     120

#__ type_ start__ end____ width___ exp.time_
 42 omega  -73.00   28.00   1.0000    8.0000
omega____ theta____ kappa____ phi______ frames
    -      -42.5000   77.0000   90.0000 101

#__ type_ start__ end____ width___ exp.time_
 43 omega  -73.00   28.00   1.0000    8.0000
omega____ theta____ kappa____ phi______ frames
    -      -42.5000   77.0000 -180.0000 101

#__ type_ start__ end____ width___ exp.time_
 44 omega   15.00   49.00   1.0000    8.0000
omega____ theta____ kappa____ phi______ frames
    -       46.0000   78.0000  -78.0000 34

#__ type_ start__ end____ width___ exp.time_
 45 omega   14.00   46.00   1.0000    8.0000
omega____ theta____ kappa____ phi______ frames
    -       46.0000   80.0000   37.0000 32

#__ type_ start__ end____ width___ exp.time_
 46 omega   15.00   47.00   1.0000    8.0000
omega____ theta____ kappa____ phi______ frames
    -       46.0000   79.0000 -133.0000 32

#__ type_ start__ end____ width___ exp.time_
 47 omega   18.00   46.00   1.0000    8.0000
omega____ theta____ kappa____ phi______ frames
    -       50.0000   80.0000  -16.0000 28

#__ type_ start__ end____ width___ exp.time_
 48 omega   19.00   49.00   1.0000    8.0000
omega____ theta____ kappa____ phi______ frames
    -       50.0000   78.0000 -157.0000 30

#__ type_ start__ end____ width___ exp.time_
 49 omega   18.00   46.00   1.0000    8.0000
omega____ theta____ kappa____ phi______ frames
    -       50.0000   80.0000   80.0000 28

#__ type_ start__ end____ width___ exp.time_
 50 omega   19.00   49.00   1.0000    8.0000
omega____ theta____ kappa____ phi______ frames
    -       50.0000   78.0000 -115.0000 30

#__ type_ start__ end____ width___ exp.time_
 51 omega   19.00   47.00   1.0000    8.0000
omega____ theta____ kappa____ phi______ frames
    -       50.0000   79.0000  153.0000 28

#__ type_ start__ end____ width___ exp.time_
 52 omega   23.00   49.00   1.0000    8.0000
omega____ theta____ kappa____ phi______ frames
    -       54.0000   78.0000  -88.0000 26

#__ type_ start__ end____ width___ exp.time_
 53 omega   34.00  124.00   1.0000    8.0000
omega____ theta____ kappa____ phi______ frames
    -       55.1171   57.0000 -120.0000 90

#__ type_ start__ end____ width___ exp.time_
 54 phi    120.00  240.00   1.0000    8.0000
omega____ theta____ kappa____ phi______ frames
  55.1171   55.1171  -60.0000     -     120

#__ type_ start__ end____ width___ exp.time_
 55 omega   31.00  127.00   1.0000    8.0000
omega____ theta____ kappa____ phi______ frames
    -       58.0000   72.0000  121.0000 96

#__ type_ start__ end____ width___ exp.time_
 56 omega   28.00  128.00   1.0000    8.0000
omega____ theta____ kappa____ phi______ frames
    -       58.0000   77.0000   37.0000 100

#__ type_ start__ end____ width___ exp.time_
 57 omega   31.00  127.00   1.0000    8.0000
omega____ theta____ kappa____ phi______ frames
    -       58.0000   72.0000 -168.0000 96

#__ type_ start__ end____ width___ exp.time_
 58 omega   30.00  128.00   1.0000    8.0000
omega____ theta____ kappa____ phi______ frames
    -       58.0000   74.0000  -87.0000 98

#__ type_ start__ end____ width___ exp.time_
 59 omega   32.00  127.00   1.0000    8.0000
omega____ theta____ kappa____ phi______ frames
    -       58.0000   70.0000    5.0000 95

#__ type_ start__ end____ width___ exp.time_
 60 omega   80.00  178.00   1.0000   14.0000
omega____ theta____ kappa____ phi______ frames
    -      110.2342   77.0000  -30.0000 98

#__ type_ start__ end____ width___ exp.time_
 61 omega   88.00  178.00   1.0000   14.0000
omega____ theta____ kappa____ phi______ frames
    -      110.2342   50.0000   60.0000 90

#__ type_ start__ end____ width___ exp.time_
 62 omega   88.00  178.00   1.0000   14.0000
omega____ theta____ kappa____ phi______ frames
    -      110.2342   50.0000 -180.0000 90

#__ type_ start__ end____ width___ exp.time_
 63 phi    120.00  240.00   1.0000   14.0000
omega____ theta____ kappa____ phi______ frames
 110.2342  110.2342  -60.0000     -     120

#__ type_ start__ end____ width___ exp.time_
 64 phi    240.00  360.00   1.0000   14.0000
omega____ theta____ kappa____ phi______ frames
 110.2342  110.2342   40.0000     -     120

#__ type_ start__ end____ width___ exp.time_
 65 omega   80.00  178.00   1.0000   14.0000
omega____ theta____ kappa____ phi______ frames
    -      110.2342   77.0000 -120.0000 98

#__ type_ start__ end____ width___ exp.time_
 66 omega   88.00  178.00   1.0000   14.0000
omega____ theta____ kappa____ phi______ frames
    -      110.2342   63.0000    0.0000 90

#__ type_ start__ end____ width___ exp.time_
 67 omega   80.00  178.00   1.0000   14.0000
omega____ theta____ kappa____ phi______ frames
    -      110.2342   77.0000   90.0000 98

#__ type_ start__ end____ width___ exp.time_
 68 phi    240.00  360.00   1.0000   14.0000
omega____ theta____ kappa____ phi______ frames
 110.2342  110.2342  -60.0000     -     120

#__ type_ start__ end____ width___ exp.time_
 69 omega   80.00  178.00   1.0000   14.0000
omega____ theta____ kappa____ phi______ frames
    -      110.2342   77.0000  -90.0000 98

#__ type_ start__ end____ width___ exp.time_
 70 omega   80.00  178.00   1.0000   14.0000
omega____ theta____ kappa____ phi______ frames
    -      110.2342   77.0000 -180.0000 98

#__ type_ start__ end____ width___ exp.time_
 71 omega   80.00  178.00   1.0000   14.0000
omega____ theta____ kappa____ phi______ frames
    -      110.2342   77.0000  -60.0000 98

#__ type_ start__ end____ width___ exp.time_
 72 omega   80.00  178.00   1.0000   14.0000
omega____ theta____ kappa____ phi______ frames
    -      110.2342   77.0000    0.0000 98

#__ type_ start__ end____ width___ exp.time_
 73 omega   80.00  155.00   1.0000   14.0000
omega____ theta____ kappa____ phi______ frames
    -      110.2342   77.0000   30.0000 75

#__ type_ start__ end____ width___ exp.time_
 74 omega   80.00  178.00   1.0000   14.0000
omega____ theta____ kappa____ phi______ frames
    -      110.2342   77.0000  150.0000 98

;
_reflns_odcompleteness_completeness 96.91
_reflns_odcompleteness_theta     66.97
_reflns_odcompleteness_iscentric 1
_diffrn_measurement_device       '\k-geometry diffractometer'
_diffrn_detector                 'CCD plate'
_diffrn_detector_type            'Agilent EOS'
_diffrn_measurement_specimen_support 'polyimid foil'
